# Supplementary material for: Signatures of Co-Deregulated Genes and Their Transcriptional Regulators in Lung Cancer
Source: Int J Mol Sci. 2022 Sep 18;23(18):10933. doi: 10.3390/ijms231810933 (PMC9504879; doi:10.3390/ijms231810933)
Supplement: Supplementary file 1 [file ijms-23-10933-s001.zip]

Archive with 16 entries (16 files):
- ijms-1930414-Figure S1.pdf
- Table S1.xlsx
- Table S10.xlsx
- Table S11.xlsx
- Table S12.xlsx
- Table S13.xlsx
- Table S14.xlsx
- Table S15.xlsx
- Table S2.xlsx
- Table S3.xlsx
- Table S4.xlsx
- Table S5.xlsx
- Table S6.xlsx
- Table S7.xlsx
- Table S8.xlsx
- Table S9.xlsx
