# Supplementary material for: Signatures of Co-Deregulated Genes and Their Transcriptional Regulators in Lung Cancer
Source: Int J Mol Sci. 2022 Sep 18;23(18):10933. doi: 10.3390/ijms231810933 (PMC9504879; doi:10.3390/ijms231810933)
Supplement: Supplementary file 1 [file ijms-23-10933-s001.zip › Table S1.xlsx]

## Sheet: Table S1
Table S1: Co-deregulated genes (co-DEGs) in LC against the adjacent normal mucosa; in LC tissue or cell lines with a single-gene perturbation against the wild type (wt) tissue or cells; and in LC tissue or cell lines with a single-drug perturbation against non-treated tissue or cells.
co-upregulated genes_LC vs Normal	co-downregulated genes_LC vs Normal	co-upregulated genes_single gene peturbation	co-downregulated genes_single gene peturbation	co-upregulated genes_single drug peturbation	co-downregulated genes_single drug peturbation
AGR2	BEX1	ABHD2	ACADM	ABCC3	ACLY
AZGP1	CCL2	ABRACL	ACE	ABLIM1	ACTB
CD24	CLEC3B	ACAT2	ACER2	ACBD3	ACTG1
COL1A2	CRIP1	ACTB	ACOT7	ACOT13	ACTN1
COL3A1	EMP2	ACTR3	ACOXL	ACTB	ACTN4
CTHRC1	FABP4	ADM	ACTB	ADM	ADM
DSP	FCGR3B	ADRB2	ACTN1	AHCY	ADNP
IGJ	FCN1	ADSS	ACTN4	AKR1B1	AIMP2
IGKV4-1	G0S2	ADSSL1	ACVRL1	AKR1B10	AKR1B10
IGLJ3	GNLY	AGPAT9	ADH1C	AKR1C3	AKR1C2
IGLL3P	GPRC5A	AKR1B10	ADIPOQ	ALCAM	AKR1C3
IGLV1-36	GZMB	ALCAM	ADRB1	ALDH1A1	ALCAM
IGLV3-19	GZMH	ANGPTL4	AGBL2	ALDH1A3	ALDH1A1
MMP1	ID1	ANKRD1	AGER	ALDH2	ALDH2
OCIAD2	IL6	ANO1	AKAP12	ALDH9A1	ALDH3A1
PIGR	MCEMP1	ANXA3	AKAP2	ALDOA	ALX1
S100A2	MNDA	AOX1	AKR1B1	ANGPTL4	AMIGO2
SCGB3A1	NKG7	AQP5	ALAS2	ANXA1	ANP32E
SPP1	NRGN	AREG	ALDH1A1	ANXA2	ANXA1
SSR4	PPBP	ARG2	ALDH2	ANXA4	ANXA2
	PRF1	ARL6IP1	ALDOA	ANXA5	ANXA3
	S100A4	ATP10D	ANKRD13A	APOA1BP	APEX1
	S100A8	ATP11A	ANP32B	APOE	AREG
	S100A9	ATP13A4	ANXA1	AREG	ARF6
	SCGB1A1	ATP1A1	ANXA2	ARHGDIA	ASNS
		ATP1B1	ANXA5	ARPC1A	ATF4
		ATP5F1	AP2M1	ARPC2	ATP2A2
		ATP5G3	APOE	ASNS	ATP5G1
		ATP5J	AQP1	ATF4	ATP6
		ATP5J2	ARAP3	ATP11A	AURKA
		ATP5L	ARF1	ATP1B1	BASP1
		ATP8B1	ARHGDIA	ATP1B3	BMP6
		AVPI1	ARPC2	ATP5B	BNC1
		AZIN1	ARPC3	ATP5G2	BSG
		BASP1	ASS1	ATP5G3	C12orf57
		BEX4	ATF4	ATP5L	C14orf2
		BHLHE40	ATP1B1	ATP6V0C	C18orf32
		BNIP3	ATP5B	ATP6V1F	C1orf194
		BRI3	ATP5C1	ATRAID	C8orf4
		BZW1	ATP5F1	AXL	C9orf3
		C16orf89	ATP5H	B2M	CA12
		C1QBP	AXL	BANF1	CALM1
		C3	B2M	BCAP31	CAMK2N1
		C5	BCAM	BEX2	CAV1
		CCND1	BCL2A1	BHLHE40	CBR1
		CD14	BGN	BLVRB	CBX3
		CD177	BMP6	BRI3	CCNB2
		CD24	BMPR2	BTG2	CCT2
		CD74	BPIFA1	BTG3	CCT4
		CD9	BPIFB1	C10orf32	CCT7
		CDH1	BSG	C14orf2	CD24
		CDH2	BTF3	C19orf33	CD59
		CDKN1A	C19orf33	C1QBP	CDC25B
		CEBPA	C1orf54	CAPG	CDKN1B
		CH25H	C1QBP	CBR1	CENPA
		CHCHD1	C20orf24	CCL2	CENPF
		CHI3L1	C3	CCL20	CFD
		CHIA	C5	CCT3	CKB
		CHORDC1	C5orf28	CD14	CKS2
		CLDN18	CA3	CD53	CNN3
		CLDN2	CA4	CD63	COL4A2
		CLDN3	CALCRL	CD99	COPB1
		CLIC4	CALR	CDH1	COTL1
		CLIP4	CAPN2	CDH2	COX1
		CLU	CAPNS1	CDK2AP1	COX16
		CNBP	CAV1	CDKN1A	COX17
		COL3A1	CAV2	CEACAM6	COX2
		COL4A1	CCDC153	CEBPB	COX5B
		COL4A2	CCNG1	CEBPD	COX6B1
		COTL1	CCNI	CFL1	COX6C
		COX6A1	CCT3	CHCHD2	COX7A2
		COX6B1	CCT4	CHP1	COX7B
		COX7A2	CCT5	CKS1B	COX8A
		COX8A	CD68	CKS2	CP
		CPM	CD74	CLDN7	CPED1
		CSDE1	CD9	CLIC1	CRIP1
		CSTB	CD97	CLTA	CRYZ
		CTGF	CD99	CLU	CSRP3
		CTSC	CDC42EP1	CNN2	CTCF
		CTSH	CDH5	COL3A1	CTNNAL1
		CTSK	CDO1	COTL1	CXADR
		CXCL17	CEBPB	COX14	CXCL10
		CYB5A	CFD	COX4I1	CYB5A
		CYBA	CFL1	COX5B	CYB5R3
		CYP2F1	CHCHD2	COX6A1	CYP24A1
		CYR61	CHST1	COX6B1	CYP4B1
		DBP	CKB	COX7A2	CYR61
		DCN	CLDN5	COX7A2L	DDX21
		DCXR	CLEC14A	COX7B	DDX3X
		DDIT4	CLIC1	COX7C	DDX47
		DHX15	CLIC4	CPNE3	DDX5
		DMKN	CLIC5	CSRP1	DHX15
		DNAJA1	CNBP	CST3	DKC1
		DRAM1	CNN2	CSTB	DKK1
		DUSP6	COL6A1	CTGF	DNAJA1
		EEF1B2	COL6A2	CTNNB1	DNAJB1
		EEF2	CORO1A	CTPS1	DUSP1
		EGR1	COX6A1	CTSB	DYNLL1
		EIF3A	COX7A1	CTSC	EDN1
		EIF3F	CPE	CTSD	EFNA1
		EIF4A1	CPM	CTSL	EGR1
		EMB	CRABP2	CXCL1	EGR3
		EMP1	CRIP1	CYBA	EIF1
		EPCAM	CRYAB	CYP1B1	EIF2S2
		EPHA2	CSDE1	CYR61	EIF3E
		EREG	CST3	DAD1	EIF3M
		ERRFI1	CTGF	DBI	EIF4A1
		ESRP1	CTNNA1	DDIT4	EIF4A2
		EXOSC7	CTSB	DHCR7	EIF4A3
		F2R	CTSD	DHRS3	EMC10
		F2RL1	CTSH	DKK1	EMP1
		F3	CTSS	DNAJB1	EMP2
		FAM102B	CXCL1	DSP	ENO1
		FAM162A	CXCL2	DUSP1	EPAS1
		FASN	CXCL3	DUSP5	EPS8
		FAT1	CXCR4	DYNLT1	ERH
		FETUB	CYP1B1	DYNLT3	ERP27
		FN1	CYP2B6	ECH1	ERRFI1
		FNDC3B	CYP2F1	EEF1B2	ETF1
		FTH1	CYP4B1	EEF1D	FAM107B
		GABARAP	CYR61	EEF1G	FAM136A
		GAPDH	CYYR1	EEF2	FAM83D
		GCLC	DBI	EGR1	FBL
		GKN2	DCN	EIF1	FGG
		GLRX	DENND3	EIF3H	FKBP4
		GOLM1	DENND5A	EIF3I	FLNB
		GPNMB	DMKN	EIF4H	FLRT3
		GPRC5A	DPEP1	ELF3	FOLR1
		GPX2	DPT	EMP3	GABRE
		GPX3	DPYSL2	ENO1	GALC
		GUCY1B3	DUSP1	EPHA2	GAPDH
		H2AFZ	DUSP6	EPS8	GEMIN6
		HADH	DYNLL1	ERH	GIMAP4
		HBEGF	ECSCR	ERRFI1	GJA1
		HERPUD1	EEF1A1	F3	GNB2L1
		HIGD2A	EEF1B2	FABP5	GOLPH3
		HINT1	EEF1G	FADS1	GPI
		HK2	EEF2	FADS2	GPX2
		HLA-A	EFEMP1	FAM83A	GPX4
		HMGN1	EGFL7	FAU	GSTP1
		HMGN3	EGR1	FDFT1	GTF2H2
		HNMT	EHD4	FDXR	H2AFZ
		HP	EIF2S2	FGD6	H3F3B
		HSP90AB1	EIF4A1	FGFBP1	HDGF
		HSP90B1	EIF4H	FHL2	HIGD2A
		HSPA8	EIF6	FN1	HINT1
		HSPD1	ELMOD1	FOSL1	HIST1H2BK
		ID1	ELOVL1	FOXJ1	HIST1H4C
		ID2	ENG	FTH1	HMMR
		IGJ	ENO1	FTH1P5	HN1
		IL33	EPAS1	FTL	HNRNPA2B1
		ITGA2	EPB41L3	G6PD	HNRNPAB
		ITGB5	ERP29	GABARAPL2	HNRNPK
		ITIH4	ESAM	GADD45A	HNRNPM
		JUND	ETS1	GAPDH	HPGD
		KCNK1	EVA1B	GCLC	HSP90AA1
		KIT	EXTL2	GCLM	HSP90AB1
		KLF2	F2R	GDF15	HSPA1A
		KRT18	FABP3	GFPT2	HSPA8
		KRT19	FAM162B	GNB2L1	HSPD1
		KRT7	FAU	GPR56	HSPE1
		KRT8	FGF1	GPRC5A	HSPH1
		LAMB3	FHL1	GPX1	ID1
		LAMC2	FIGF	GPX2	ID2
		LAPTM4A	FKBP1A	GRN	ID3
		LCN2	FKBP9	GSTO1	IER2
		LDHA	FMNL2	H1F0	IER3
		LGALS3BP	FMO1	H3F3B	IGFBP3
		LOC100129361	FMO3	HDGF	IGFBP4
		LPCAT1	FOS	HEBP1	IGJ
		LRG1	FOXF1	HERPUD1	IL12A
		LRRC8C	FPR2	HEXB	ILF2
		LTBP2	FTH1	HIF1A	INHBB
		LYZ	FTL	HINT1	KCNMA1
		MAL	G0S2	HLA-A	KIF23
		MARCKSL1	GABARAP	HMGA1	KLF10
		ME1	GAPDH	HMGCS1	KPNA2
		MFAP4	GBP2	HMGN2	KRT18
		MFSD2A	GDI2	HMOX1	KRT8
		MGST1	GDPD3	HSBP1	KRT81
		MID1IP1	GIMAP8	HSP90AB1	KYNU
		MLLT11	GJA1	HSPA1A	LAPTM4A
		MORF4L2	GJA4	HSPA5	LBR
		MRC1	GNAS	HSPB1	LDHA
		MRPL32	GNB2	IARS	LDHB
		MT1HL1	GNB2L1	IER2	LEPROT
		MT1X	GNG11	IER3	LPCAT1
		MYH7	GNG5	IFITM1	LY6D
		NAB2	GOT2	IL1B	LY6E
		NACA	GPAM	INSL4	MANF
		NAPSA	GPI	ISCU	MAT2A
		NDUFA1	GPR116	ITGB8	MCM3
		NDUFA2	GPR126	JUN	MCM6
		NDUFA3	GPR182	JUNB	MCM7
		NDUFA4	GPRC5A	KCNK1	MGME1
		NDUFC2	GPX1	KDELR1	MID1
		NFE2L2	GPX3	KLF10	MIF
		NME2	GSN	KRT10	MIR663AHG
		NPC2	GSTM1	KRT17	MLPH
		NPM1	GSTO1	KRT7	MMD
		NR4A1	GSTP1	KRT8	MORF4L1
		NRP1	GUCY1B3	KRT81	MRPL23
		NUCB2	GYG1	LAMB3	MRPL45
		OGN	H3F3B	LAPTM4B	MRPL51
		OVOS2	HCK	LAPTM5	MRPS24
		P4HB	HDC	LBH	MRPS34
		PABPC1	HEY1	LDHA	MT1E
		PAG1	HIST1H2BI	LGALS1	MT1H
		PAICS	HLA-A	LGALS3	MT1X
		PARM1	HLA-DQA1	LGMN	MT2A
		PCBD1	HLA-DQB1	LIPA	MTHFD1
		PCDHB6	HLA-DRB5	LTA4H	MTHFD2
		PFKFB3	HMGN2	LTBP4	MUC5B
		PGLYRP1	HNRNPA1	MAFG	MYC
		PHLDA1	HNRNPAB	MALAT1	MYL12A
		PHLDB2	HOPX	MANF	NANP
		PI4K2B	HP	MAP1B	NCEH1
		PLS3	HPGD	MATN4	NCL
		PPIC	HSD11B1	MEA1	NCOR2
		PRDX4	HSP90AB1	MFGE8	ND2
		PRNP	HSP90B1	MGST1	NDUFB9
		PRR15L	HSPA8	MITF	NET1
		PSAP	HSPB1	MKNK2	NFKBIA
		PSMA1	HSPD1	MMADHC	NOP2
		PSMA2	HSPH1	MRFAP1	NOP56
		PSMA4	HTRA1	MRPL33	NOP58
		PSMB8	HUWE1	MRPL51	NPM1
		PSME1	ICAM1	MRPS24	NPR3
		PTGR1	ICAM2	MSN	NQO1
		PTP4A2	ID3	MT2A	NR4A1
		PTPRF	IER3	MTHFD2	NT5E
		PTPRN	IFI27	MX1	NTS
		RAB3B	IFI44L	MYADM	OAZ1
		RAP1GAP	IFITM1	MYC	ODC1
		RBM3	IFITM2	MYH9	OSTC
		RBP4	IFITM3	MYL12B	PARK7
		RGCC	IGFBP2	MYL6	PBK
		RNASE4	IGFBP3	NACA	PCBP1
		RND3	IGFBP4	NACAP1	PCBP2
		RNF11	IGFBP6	NARS	PCNA
		RNF128	IGFBP7	NDRG1	PFDN5
		RPL10A	IMPG2	NDUFA1	PFKFB3
		RPL11	INMT	NDUFA12	PFKP
		RPL13A	ISG15	NDUFAB1	PFN1
		RPL18	ITGA6	NDUFB11	PGK1
		RPL22	ITGA8	NDUFS6	PHB2
		RPL27A	ITGB2	NDUFV2	PHF23
		RPL3	ITM2B	NEDD8	PKM
		RPL36AL	ITPRIPL2	NFIL3	PLAT
		RPL4	JUN	NFKBIA	PLCXD1
		RPS11	JUNB	NGFRAP1	PLD3
		RPS12	KDELC2	NHP2	PLK1
		RPS13	KDR	NME1	PLP2
		RPS19	KIAA1462	NOG	PLTP
		RPS2	KIT	NOP10	POLR2L
		RPS23	KITLG	NPC2	PON2
		RPS27A	KLF2	NPM1	POP7
		RPS27L	KLF4	NQO1	PPDPF
		RPS29	KLHL5	NRSN2	PPEF1
		RPS7	KRT18	NSA2	PPIA
		RPS8	KRT19	NUTF2	PPIB
		RRS1	KRT8	OCIAD2	PRC1
		S100A14	LAMP1	OST4	PRPF8
		S100A4	LAPTM4A	PABPC1	PSAT1
		SCD	LASP1	PABPC3	PSMC6
		SCGB1A1	LCN2	PARK7	PTBP3
		SCGB3A1	LDHA	PCBP1	PTDSS1
		SCNN1A	LDHB	PDGFA	PTGES3
		SDC1	LGALS1	PDIA6	PTPRO
		SDC4	LGALS3	PDK4	PTTG1
		SEC61G	LHFP	PFDN2	QARS
		SELENBP1	LIMCH1	PFDN5	RAC1
		SEMA3C	LIMS2	PFKFB3	RAN
		SERPINE1	LOX	PFN1	RANBP1
		SERPINE2	LOXL1	PGAM1	RARS
		SFTPA1	LRRC17	PGD	RBMX
		SFTPC	LRRC58	PHB2	REPIN1
		SFTPD	LTBP1	PIGR	RGS2
		SFXN1	LYVE1	PIR	RHOA
		SGK1	MAGED1	PLAU	RHPN2
		SGMS1	MALL	PLIN2	RNASEK
		SGPP2	MAMDC2	PLK2	RPA3
		SH3BGRL3	MAPK3	PNRC1	RPL10
		SIVA1	METTL7A	POLR2G	RPL10A
		SLC12A2	MFAP4	POLR2L	RPL11
		SLC15A2	MGP	PPP1R15A	RPL12
		SLC25A5	MGST1	PPP1R15B	RPL17
		SLC26A4	MID1IP1	PRDX1	RPL18
		SLC2A3	MSN	PRDX5	RPL18A
		SLPI	MT1E	PRDX6	RPL19
		SNX25	MTCH1	PRKAR1A	RPL26
		SOCS2	MTHFD2	PRNP	RPL27
		SOD2	MXRA8	PROCR	RPL27A
		SORL1	MYC	PRR13	RPL32
		SP3	MYH10	PRSS23	RPL34
		SPARC	MYL4	PSAP	RPL35
		SPINT1	MYL7	PSMA1	RPL35A
		SPINT2	MYL9	PSMB3	RPL36AL
		SPP1	MYZAP	PSMB6	RPL4
		SPRR1A	NACA	PSMB7	RPL5
		SPRR1B	NAPSA	PSMD8	RPL6
		SRP9	NDUFA1	PSME1	RPL7A
		ST8SIA6	NDUFA13	PSME2	RPL8
		STARD10	NEFL	PTP4A1	RPL9
		SYTL5	NFKBIA	PTPLAD1	RPLP1
		TAGLN2	NFKBIZ	RAB13	RPS10
		TCP1	NGFRAP1	RAB5C	RPS11
		TF	NHP2	RABAC1	RPS14
		TFPI	NONO	RAP1B	RPS15A
		TFRC	NPC2	RAP1GAP	RPS16
		THBS1	NPM1	RBP7	RPS17
		TIMM8B	NPNT	RCN1	RPS19
		TMA7	NPPA	RNASE4	RPS2
		TMBIM6	NREP	RNASEK	RPS20
		TMC4	NUPR1	RND3	RPS21
		TMEM213	OAT	RNF181	RPS23
		TMEM30B	OAZ1	RNPEP	RPS24
		TMEM50A	ODC1	RPL11	RPS25
		TMSB15A	OGN	RPL12	RPS28
		TNFRSF12A	OLFML3	RPL13A	RPS29
		TSPAN13	OR8G1	RPL17	RPS3
		TST	OS9	RPL19	RPS3A
		TUSC3	OTUD6B	RPL21	RPS4X
		TXNIP	P4HB	RPL22	RPS7
		UBE2E3	PABPC1	RPL23	RPS8
		UBL3	PALD1	RPL23A	RPS9
		UQCR11	PCBP1	RPL24	RRAD
		UQCRB	PCOLCE	RPL27	RRS1
		VCPKMT	PCOLCE2	RPL28	RSL24D1
		VMP1	PDIA3	RPL3	RSRC2
		WBP5	PDLIM1	RPL32	S100A10
		WFDC2	PDPN	RPL35	S100A16
		ZFP36L1	PFN1	RPL36A	S100A2
			PGRMC1	RPL37A	S100A6
			PHB2	RPL38	S100A8
			PKM	RPL39	S100A9
			PLAC8	RPL4	SCD
			PLOD2	RPL5	SDPR
			PLTP	RPL8	SELT
			PLVAP	RPL9	SEMA3C
			PMP22	RPLP0	SERP1
			POMP	RPLP2	SERPINB6
			POSTN	RPN2	SERPIND1
			PPA1	RPS10	SFTPC
			PPAP2B	RPS12	SGCE
			PPIA	RPS13	SGK223
			PPIB	RPS14P3	SHFM1
			PPP1CC	RPS15	SIK1
			PPP1R14A	RPS15A	SLC16A14
			PRDX1	RPS16	SLC25A3
			PRDX6	RPS17	SLC25A6
			PRELP	RPS18	SLC38A2
			PRICKLE1	RPS19	SLC7A5
			PRICKLE2	RPS21	SNHG5
			PRMT1	RPS25	SNRPA
			PRSS3	RPS26	SNRPD2
			PRX	RPS27	SNRPG
			PSAP	RPS27L	SOX4
			PSMB1	RPS3	SRP9
			PSMB7	RPS3A	SRSF2
			PSME2	RPS4Y1	SRSF3
			PTGES3	RPS6	SRSF7
			PTGIS	RPS8	SRXN1
			PTPRB	RRAGA	SSB
			PTTG1	RRM1	SSR2
			PTTG1IP	RRM2	SSR3
			PXDN	S100A10	SSRP1
			RABAC1	S100A11	STC1
			RAC1	S100A13	TAGLN
			RAMP2	S100A16	TCEB1
			RAN	S100A4	TESC
			RAPGEF2	S100A6	TGFB1I1
			RELA	SAT1	TGFBI
			RHOB	SCARB1	TGFBR1
			RHOC	SCD	TGFBR2
			RIPPLY3	SCGB3A1	TIMM13
			RPL10	SDC1	TIMM17A
			RPL10A	SDC4	TIMM23
			RPL11	SEC11A	TK1
			RPL12	SEC61G	TKT
			RPL13A	SERPINE1	TM4SF1
			RPL15	SERPINE2	TM4SF20
			RPL17	SERPINF1	TMED2
			RPL19	SFN	TMEM14B
			RPL22	SH3RF1	TMEM230
			RPL24	SHC1	TMEM256
			RPL26	SHFM1	TMEM27
			RPL28	SLAMF7	TMEM47
			RPL29	SLC20A1	TMEM50A
			RPL3	SLC25A15	TMOD3
			RPL32	SLC25A3	TMSB10
			RPL34	SLC25A6	TNFRSF12A
			RPL35	SLIRP	TNFRSF1A
			RPL37A	SLPI	TNS3
			RPL38	SNHG6	TNS4
			RPL4	SNRPD2	TOB1
			RPL5	SNRPF	TOMM5
			RPL6	SOD1	TOP1
			RPL7A	SOD2	TOP2A
			RPL8	SPARCL1	TRA2B
			RPL9	SPINK6	TRAM1
			RPLP0	SPINT2	TRAP1
			RPLP2	SPP1	TRIB3
			RPN2	SQLE	TRIM28
			RPP25	SQSTM1	TRMT5
			RPS10	SRP14	TSKU
			RPS12	STBD1	TUBA1A
			RPS14	SUCNR1	TUBA1B
			RPS15	TACSTD2	TUBA1C
			RPS15A	TAGLN2	TUBB
			RPS16	TALDO1	TUBB2B
			RPS17	TBCA	TUBB3
			RPS18	TCEB1	TUBB4B
			RPS19	TIPARP	TXLNG
			RPS20	TKT	TXNRD1
			RPS21	TM4SF1	UBA2
			RPS23	TM7SF2	UBB
			RPS24	TMBIM4	UBC
			RPS25	TMED10	UBE2S
			RPS27A	TMED2	UGDH
			RPS28	TMEM117	UQCC3
			RPS29	TMSB10	UQCRB
			RPS5	TNFAIP8	USP11
			RPS7	TNFRSF10B	VCAN
			RPS8	TOB1	VDAC2
			RPS9	TOX2	VIM
			RPSA	TP53I3	VMP1
			RTKN2	TPT1	WIPI1
			S100A10	TRIAP1	XBP1
			S100A13	TRIB1	XPOT
			S100A16	TRIB3	YBX1
			S100A6	TSG101	YBX3
			S100A8	TSPAN3	YTHDF2
			S100A9	TSPO	YWHAG
			S100G	TUBA1A	ZFAND5
			SAMD12	TUBG1	ZFP36L1
			SARAF	TXN	ZNF146
			SARS	TXNIP	ZNF281
			SATB1	TXNL4A	ZSWIM6
			SCD	TXNRD1
			SCGB1A1	UBA52
			SCGB3A2	UBB
			SCN3B	UCHL1
			SCN7A	UCP2
			SCNN1G	UQCRB
			SCUBE2	UQCRC1
			SDPR	UQCRH
			SELENBP1	UQCRQ
			SEMA3C	USMG5
			SEMA3G	VAT1
			SEPP1	VIM
			SEPW1	VIMP
			SERPINA3	XPOT
			SERPINE2	YBX1
			SERPINF1	YBX3
			SERPING1	YWHAQ
			SERPINH1	YWHAZ
			SFTPB	ZFP36
			SGK1	ZWINT
			SH3BGRL
			SHC1
			SHFM1
			SLC25A3
			SLC25A6
			SLC43A3
			SLC9A3R2
			SMAD6
			SNX3
			SOX17
			SOX18
			SOX2
			SPARC
			SPP1
			SPTAN1
			SQRDL
			ST5
			ST8SIA4
			TBX2
			TCF21
			TCN2
			TEK
			TGFBI
			THBD
			TIMP1
			TIMP2
			TKT
			TMA7
			TMBIM1
			TMBIM6
			TMCC2
			TMCC3
			TMEM100
			TMEM109
			TMEM204
			TNFRSF19
			TNFSF10
			TNNC1
			TNS1
			TOMM20
			TPI1
			TPPP3
			TPRG1L
			TPT1
			TSPAN13
			TSPAN31
			TSPAN7
			TSPAN8
			TSPO
			TUBA1A
			TUBA1B
			TUBB
			TXNIP
			TYROBP
			UACA
			UBA52
			UBC
			UBE2E1
			UPP1
			UQCRH
			USMG5
			VCL
			VCP
			VDAC2
			VIM
			VOPP1
			VWF
			WFDC2
			ZFP36
