# Supplementary material for: Signatures of Co-Deregulated Genes and Their Transcriptional Regulators in Lung Cancer
Source: Int J Mol Sci. 2022 Sep 18;23(18):10933. doi: 10.3390/ijms231810933 (PMC9504879; doi:10.3390/ijms231810933)
Supplement: Supplementary file 1 [file ijms-23-10933-s001.zip › Table S2.xlsx]

## Sheet: Normal vs Lung cancer
Table S2. GEO datasets. The Table shows the GEO datasets that were used for analysis in each category (lung vs normal; single-gene perturbation experiments; single-drug perturbation experiments), along with corresponding information.
GEO Accession Number		Control Samples	Lung Cancer Samples	Subtype	Summary	Platform	Citation	Reference Series
GDS3837		GSM494625	GSM494565	Non-small cell lung carcinoma	Analysis of paired tumor and adjacent normal lung tissue specimens obtained from nonsmoking female non-small cell lung carcinoma (NSCLC) patients in Taiwan. Results provide insight into potential prognostic biomarkers and therapeutic targets for NSCLC.	GPL570: [HG-U133_Plus_2] Affymetrix Human Genome U133 Plus 2.0 Array	Lu TP, Tsai MH, Lee JM, Hsu CP et al. Identification of a novel biomarker, SEMA5A, for non-small cell lung carcinoma in nonsmoking women. Cancer Epidemiol Biomarkers Prev 2010 Oct;19(10):2590-7. PMID: 20802022 Lu TP, Hsiao CK, Lai LC, Tsai MH et al. Identification of regulatory SNPs associated with genetic modifications in lung adenocarcinoma. BMC Res Notes 2015 Mar 24;8:92. PMID: 25889623	GSE19804
		GSM494627	GSM494602
		GSM494672	GSM494612
		GSM494663	GSM494603
		GSM494647	GSM494582
		GSM494640	GSM494563
		GSM494645	GSM494585
		GSM494667	GSM494607
		GSM494650	GSM494590
		GSM494639	GSM494566
		GSM494654	GSM494594
		GSM494673	GSM494613
		GSM494618	GSM494558
		GSM494628	GSM494568
		GSM494659	GSM494599
		GSM494623	GSM494576
		GSM494671	GSM494611
		GSM494621	GSM494569
		GSM494669	GSM494609
		GSM494661	GSM494601
		GSM494664	GSM494604
		GSM494649	GSM494589
		GSM494631	GSM494556
		GSM494632	GSM494572
		GSM494670	GSM494610
		GSM494644	GSM494605
		GSM494655	GSM494560
		GSM494629	GSM494561
		GSM494666	GSM494608
		GSM494617	GSM494557
		GSM494624	GSM494564
		GSM494658	GSM494598
		GSM494619	GSM494559
		GSM494660	GSM494600
		GSM494675	GSM494587
		GSM494646	GSM494584
		GSM494620	GSM494595
		GSM494637	GSM494592
		GSM494668	GSM494606
		GSM494626	GSM494579
		GSM494651	GSM494591
		GSM494653	GSM494593
		GSM494674	GSM494571
		GSM494622	GSM494562
		GSM494641	GSM494581
		GSM494665	GSM494586
		GSM494630	GSM494570
		GSM494652	GSM494577
		GSM494633	GSM494574
		GSM494656	GSM494596
		GSM494662	GSM494567
		GSM494643	GSM494583
		GSM494616	GSM494614
		GSM494642	GSM494615
		GSM494636	GSM494580
		GSM494638	GSM494578
		GSM494657	GSM494597
		GSM494648	GSM494588
		GSM494634	GSM494573
		GSM494635	GSM494575
GDS4794		GSM1060768	GSM1060768	Small cell lung cancer	Analysis of 23 clinical small cell lung cancer (SCLC) samples from patients undergoing pulmonary resection and 42 normal tissue samples including the lung. SCLC is a lung cancer subtype with poor prognosis. Results provide insight into the molecular mechanisms underlying SCLC.	GPL570: [HG-U133_Plus_2] Affymetrix Human Genome U133 Plus 2.0 Array	Sato T, Kaneda A, Tsuji S, Isagawa T et al. PRC2 overexpression and PRC2-target gene repression relating to poorer prognosis in small cell lung cancer. Sci Rep 2013;3:1911. PMID: 23714854	GSE43346
		GSM1060774	GSM1060769
		GSM1060780	GSM1060770
		GSM1060786	GSM1060771
		GSM1060769	GSM1060772
		GSM1060775	GSM1060773
		GSM1060781	GSM1060774
		GSM1060787	GSM1060776
		GSM1060770	GSM1060775
		GSM1060776	GSM1060777
		GSM1060782	GSM1060778
		GSM1060788	GSM1060779
		GSM1060771	GSM1060780
		GSM1060777	GSM1060781
		GSM1060783	GSM1060782
		GSM1060789	GSM1060783
		GSM1060773	GSM1060784
		GSM1060778	GSM1060786
		GSM1060784	GSM1060785
		GSM1060790	GSM1060787
		GSM1060772	GSM1060788
		GSM1060779	GSM1060789
		GSM1060785	GSM1060790

## Sheet: Single-gene perturbation 
GEO Accession Number	Control Samples	Treatment Samples	Subtype	Summary	Platform	Citation	Reference Series
GDS2958	GSM183436	GSM183438	Non small cell lung cancer	Analysis of A431, HCC827, and SKBR-3 carcinoma cell lines depleted for the tumor suppressor PTEN. Inactivation of PTEN is a common genetic lesion in cancer. Results provide insight into the molecular basis of the oncogenic phenotypes resulting from PTEN deficiency.	GPL570: [HG-U133_Plus_2] Affymetrix Human Genome U133 Plus 2.0 Array	Vivanco I, Palaskas N, Tran C, Finn SP et al. Identification of the JNK signaling pathway as a functional target of the tumor suppressor PTEN. Cancer Cell 2007 Jun;11(6):555-69. PMID: 17560336	GSE7562
	GSM183437	GSM183439
GDS3029	GSM170724	GSM170738	Small-cell lung cancer	Analysis of small-cell lung carcinoma cell (SCLC) lines. Expression profiles compared to the cell lines' sensitivity to the Bcl-2 antagonist ABT-737 and chromosomal gains that include changes in Bcl-2 gene copy number. ABT-737 induces the regression of a fraction of SCLC solid tumors.	GPL571: [HG-U133A_2] Affymetrix Human Genome U133A 2.0 Array	Olejniczak ET, Van Sant C, Anderson MG, Wang G et al. Integrative genomic analysis of small-cell lung carcinoma reveals correlates of sensitivity to bcl-2 antagonists and uncovers novel chromosomal gains. Mol Cancer Res 2007 Apr;5(4):331-9. PMID: 17426248	GSE7097
	GSM170725	GSM170740
	GSM170728	GSM170741
	GSM170732	GSM170710
	GSM170733	GSM170712
	GSM170730	GSM170735
	GSM170731	GSM17074
GDS3321	GSM277580	GSM277576	Lung adenocarcinoma	Analysis of cancerous lungs of transgenics overexpressing the c-Myc proto-oncogene in their alveolar epithelia. This overexpression results in bronchiolo-alveolar carcinoma and papillary adenocarcinoma. Results provide insight into the molecular mechanisms by which c-Myc effects tumorigenesis.	GPL1261: [Mouse430_2] Affymetrix Mouse Genome 430 2.0 Array	Reymann S, Borlak J. Transcription profiling of lung adenocarcinomas of c-myc-transgenic mice: identification of the c-myc regulatory gene network. BMC Syst Biol 2008 May 22;2:46. PMID: 18498649	GSE10954
	GSM277581	GSM277577
	GSM277582	GSM277578
	GSM277583	GSM277579
GDS3510	GSM260533	GSM260535	Lung adenocarcinoma	Analysis of lung adenocarcinoma CL1-5 cells overexpressing Claudin-1 (CLDN1), a component of tight junction complexes. Low CLDN1 expression in lung adenocarcinomas is associated with shorter overall survival. Results provide insight into the role of CLDN1 in the progression of lung adenocarcinoma.	GPL570: [HG-U133_Plus_2] Affymetrix Human Genome U133 Plus 2.0 Array	Chao YC, Pan SH, Yang SC, Yu SL et al. Claudin-1 is a metastasis suppressor and correlates with clinical outcome in lung adenocarcinoma. Am J Respir Crit Care Med 2009 Jan 15;179(2):123-33. PMID: 18787218	GSE10309
	GSM260534	GSM260536
GDS3825	GSM351095	GSM351067	Lung carcinoma	Analysis of dysplastic lung cells and transgenic but morphologically unaltered lung cells, both harvested from SP-C/c-raf transgenics. Normal lung from non-transgenic littermates also examined. Results provide insight into molecular mechanisms underlying an early stage of lung cancer development.	GPL1261: [Mouse430_2] Affymetrix Mouse Genome 430 2.0 Array	Rohrbeck A, Müller VS, Borlak J. Molecular characterization of lung dysplasia induced by c-Raf-1. PLoS One 2009 May 20;4(5):e5637. PMID: 19529782	GSE13963
	GSM351144	GSM351068
	GSM351146	GSM351066
	GSM351145	GSM351065
	GSM351147	GSM351069
GDS3826	GSM351072	GSM357141	Lung adenocarcinoma	Analysis of lung tumor cells and transgenic but morphologically unaltered lung cells, both harvested from SP-C/c-raf transgenics. Normal lung from non-transgenic littermates also examined. Results provide insight into molecular mechanisms underlying the progression from lung dysplasia to cancer.	GPL1261: [Mouse430_2] Affymetrix Mouse Genome 430 2.0 Array	Rohrbeck A, Borlak J. Cancer genomics identifies regulatory gene networks associated with the transition from dysplasia to advanced lung adenocarcinomas induced by c-Raf-1. PLoS One 2009 Oct 8;4(10):e7315. PMID: 19812696	GSE14277
	GSM351094	GSM357143
	GSM351071	GSM357144
	GSM351095	GSM357142
	GSM351144	GSM357145
GDS4840	GSM1245196	GSM1245194	Lung carcinoma	Analysis of lungs from CCR5-deficient mutants 6 to 48 hrs after tail vein injection with B16-F10 melanoma cells. Lungs of CCR5-deficient mutants develop fewer metastatic nodules than in wild type animals. Results provide insight into the molecular mechanisms underlying CCR5-dependent metastasis.	GPL1261: [Mouse430_2] Affymetrix Mouse Genome 430 2.0 Array	Mango RL, Wu QP, West M, McCook EC et al. C-C chemokine receptor 5 on pulmonary mesenchymal cells promotes experimental metastasis via the induction of erythroid differentiation regulator 1. Mol Cancer Res 2014 Feb;12(2):274-82. PMID: 24197118	GSE51422
	GSM1245198	GSM1245193
	GSM1245200	GSM1245191
GDS5201	GSM661022	GSM661020	Lung carcinoma	Analysis of lung tumors resulting from the concurrent activation of Wnt/beta-catenin signaling and expression of a constitutively active Kras mutant in the lung epithelium. 21% of lung tumors have Kras mutations. Results provide insight into the role of Wnt/beta-catenin signaling in lung cancer.	GPL6246: [MoGene-1_0-st] Affymetrix Mouse Gene 1.0 ST Array [transcript (gene) version]	Pacheco-Pinedo EC, Durham AC, Stewart KM, Goss AM et al. Wnt/β-catenin signaling accelerates mouse lung tumorigenesis by imposing an embryonic distal progenitor phenotype on lung epithelium. J Clin Invest 2011 May;121(5):1935-45. PMID: 21490395	GSE26850
	GSM661023	GSM661021
GDS5496	GSM832616	GSM832614	Lung adenocarcinoma	Analysis of NCI-H441 adenocarcinoma cells expressing hsa-miR-365-2, a precursor of miR-365. Results identify targets of miR-365 and the role of miR-365 in the pulmonary transcriptional program responsible for lung development and malignancy.	GPL6244: [HuGene-1_0-st] Affymetrix Human Gene 1.0 ST Array [transcript (gene) version]	Qi J, Rice SJ, Salzberg AC, Runkle EA et al. MiR-365 regulates lung cancer and developmental gene thyroid transcription factor 1. Cell Cycle 2012 Jan 1;11(1):177-86. PMID: 22185756	GSE33672
	GSM832617	GSM832615
GDS5648	GSM1357899	GSM1357904	Lung carcinoma	Analysis of lung tumors isolated from mice that develop KRAS-driven lung tumors. The KrasG12D mice were fed a high-calorie diet (HCD) starting 12 wk before tumor induction; tumors were collected 11 wk after tumor induction. Results provide insight into HCD effects on KRAS-driven lung tumorigenesis.	GPL6887: Illumina MouseWG-6 v2.0 expression beadchip	Ramadori G, Konstantinidou G, Venkateswaran N, Biscotti T et al. Diet-induced unresolved ER stress hinders KRAS-driven lung tumorigenesis. Cell Metab 2015 Jan 6;21(1):117-25. PMID: 25533479	GSE56260
	GSM1357901	GSM1357905
	GSM1357900	GSM1357906
	GSM1357902	GSM1357907
	GSM1357903	GSM1357908
		GSM1357909

## Sheet: Single drug perturbation
GEO Accession Number	Control Samples	Treatment Samples	Summary	Platform	Citation	Reference Series
GDS1649	GSM47977	GSM47985	Analysis of pulmonary adenocarcinomas (AC). Carcinogen exposure is responsible for the majority of ACs. Results compared with those obtained from a urethane-induced lung tumor model in the mouse (GDS1649), and provide insight into the conserved pathways underlying the development of AC.	GPL81: [MG_U74Av2] Affymetrix Murine Genome U74A Version 2 Array	Stearman RS, Dwyer-Nield L, Zerbe L, Blaine SA et al. Analysis of orthologous gene expression between human pulmonary adenocarcinoma and a carcinogen-induced murine model. Am J Pathol 2005 Dec;167(6):1763-75. PMID: 16314486	GSE2514
	GSM47978	GSM47986
	GSM47979	GSM47987
	GSM47980	GSM47988
	GSM47981	GSM47989
	GSM47982	GSM47990
	GSM47983	GSM47991
	GSM47984	GSM47992
	GSM47997	GSM47993
	GSM47998	GSM47994
	GSM47999	GSM47995
	GSM48000	GSM47996
	GSM48001	GSM48004
	GSM48002	GSM48005
	GSM48003	GSM48006
		GSM48007
		GSM48008
		GSM48009
		GSM48010
		GSM48011
		GSM48012
		GSM48013
		GSM48014
		GSM48015
		GSM48016
		GSM48017
		GSM48018
		GSM48019
		GSM48020
GDS2298	GSM99020	GSM99035	Analysis of baseline non-small cell lung cancer (NSCLC) cell lines with a broad range of sensitivity to the anticancer drug gefitinib. Gefitinib is an epidermal growth factor receptor (EGFR) tyrosine kinase inhibitor (TKI). Results used to define a gene expression signature of gefitinib sensitivity.	GPL97: [HG-U133B] Affymetrix Human Genome U133B Array	Coldren CD, Helfrich BA, Witta SE, Sugita M et al. Baseline gene expression predicts sensitivity to gefitinib in non-small cell lung cancer cell lines. Mol Cancer Res 2006 Aug;4(8):521-8. PMID: 16877703 Barthel BL, Zhang Z, Rudnicki DL, Coldren CD et al. Preclinical efficacy of a carboxylesterase 2-activated prodrug of doxazolidine. J Med Chem 2009 Dec 10;52(23):7678-88. PMID: 19634903	GSE4342
	GSM99022	GSM99028
	GSM99024	GSM99018
	GSM99029	GSM99034
	GSM99030	GSM99025
	GSM99019	GSM99033
	GSM99021	GSM99027
	GSM99023
	GSM99026
	GSM99031
GDS2489	GSM99020	GSM114034	Analysis of large airway epithelial cells of phenotypically normal smokers. Lung cancer tumors exhibit neuroendocrine properties, and chronic smokers have increased numbers of neuroendocrine cells. Results provide insight into the effect of cigarette smoking on neuroendocrine cells.	GPL80: [Hu6800] Affymetrix Human Full Length HuGeneFL Array	Carolan BJ, Heguy A, Harvey BG, Leopold PL et al. Up-regulation of expression of the ubiquitin carboxyl-terminal hydrolase L1 gene in human airway epithelium of cigarette smokers. Cancer Res 2006 Nov 15;66(22):10729-40. PMID: 17108109	GSE5056
	GSM99022	GSM114035
	GSM99024	GSM114036
	GSM99029	GSM114037
	GSM99030	GSM114038
	GSM99019	GSM114039
	GSM99021	GSM114040
	GSM99023	GSM114041
	GSM99026	GSM114042
	GSM99031	GSM114043
	GSM99032	GSM114044
		GSM114045
		GSM114046
		GSM114047
		GSM114048
		GSM114049
		GSM114050
		GSM114051
GDS2499	GSM147365	GSM147369	Analysis of A549 lung cancer cells following treatment with anti-cancer agent sapphyrin PCI-2050 or transcription inhibitor actinomycin D. Hydrophilic sapphyrins localize to tumors, generate oxidative stress, and inhibit gene expression.	GPL570: [HG-U133_Plus_2] Affymetrix Human Genome U133 Plus 2.0 Array	Wang Z, Lecane PS, Thiemann P, Fan Q et al. Synthesis and biologic properties of hydrophilic sapphyrins, a new class of tumor-selective inhibitors of gene expression. Mol Cancer 2007 Jan 19;6:9. PMID: 17233922	GSE6400
	GSM147366	GSM147370
	GSM147367	GSM147520
		GSM147521
		GSM147522
		GSM147099
		GSM147363
		GSM147364
		GSM147368
GDS2604	GSM139646	GSM139640	Analysis of epithelial and mesothelial lung cell lines at various time points up to 7 days after exposure to asbestos. Asbestos exposure causes lung diseases such as asbestosis, malignant mesothelioma, and lung cancer. Results provide insight into the pathogenesis of asbestos-associated diseases.	GPL570: [HG-U133_Plus_2] Affymetrix Human Genome U133 Plus 2.0 Array	Nymark P, Lindholm PM, Korpela MV, Lahti L et al. Gene expression profiles in asbestos-exposed epithelial and mesothelial lung cell lines. BMC Genomics 2007 Mar 1;8:62. PMID: 17331233	GSE6013
	GSM139660	GSM139654
	GSM139647	GSM139760
	GSM139661	GSM139641
	GSM139669	GSM139655
	GSM139648	GSM139643
	GSM139663	GSM139656
	GSM139653	GSM139657
	GSM139664	GSM139644
	GSM139652	GSM139645
	GSM139666	GSM139659
	GSM139761	GSM139667
	GSM139649	GSM139668
		GSM139642
GDS2966	GSM228717	GSM228718	Analysis of lung carcinoma A549 cells treated with resveratrol. Resveratrol is a phytoestrogen found in red wine. Results provide insight into protective effect of resveratrol against lung cancer.	GPL570: [HG-U133_Plus_2] Affymetrix Human Genome U133 Plus 2.0 Array	Whyte L, Huang YY, Torres K, Mehta RG. Molecular mechanisms of resveratrol action in lung cancer cells using dual protein and microarray analyses. Cancer Res 2007 Dec 15;67(24):12007-17. PMID: 18089832	GSE9008
	GSM228719	GSM228720
GDS3101	GSM147889	GSM147892	Analysis of cisplatin-resistant A549 lung adenocarcinoma cell line treated with cisplatin, a chemotherapy drug. Its cytotoxic effects are likely due to the DNA damage it induces in cells. Results provide insight into molecular mechanisms underlying the response of A549 to cisplatin insult.	GPL201: [HG-Focus] Affymetrix Human HG-Focus Target Array	Almeida GM, Duarte TL, Farmer PB, Steward WP et al. Multiple end-point analysis reveals cisplatin damage tolerance to be a chemoresistance mechanism in a NSCLC model: implications for predictive testing. Int J Cancer 2008 Apr 15;122(8):1810-9. PMID: 18074354	GSE6410
	GSM147890	GSM147893
	GSM147891	GSM147894
GDS4847	GSM1001779	GSM1001775	Lung cAnalysis of lungs of F344 females exposed to 0 to 200 ppm chloroprene (CR) for 5 or 15 days. CR, a monomer used in the production of neoprene elastomers, generates multiorgan tumors in mouse and rat cancer bioassays. Compared to mice (GDS4847), F344 rats are insensitive to CR-induced lung tumors.arcinoma	GPL1355: [Rat230_2] Affymetrix Rat Genome 230 2.0 Array	Thomas RS, Himmelstein MW, Clewell HJ 3rd, Yang Y et al. Cross-species transcriptomic analysis of mouse and rat lung exposed to chloroprene. Toxicol Sci 2013 Feb;131(2):629-40. PMID: 23125180	GSE40795
	GSM1001780	GSM1001776
	GSM1001781	GSM1001777
	GSM1001782	GSM1001778
	GSM1001783	GSM1001874
	GSM1001784	GSM1001804
	GSM1001785	GSM1001805
	GSM1001786	GSM1001807
	GSM1001787	GSM1001806
	GSM1001788	GSM1001808
		GSM1001794
		GSM1001796
		GSM1001795
		GSM1001797
		GSM1001798
		GSM1001814
		GSM1001815
		GSM1001816
		GSM1001817
		GSM1001818
		GSM1001869
		GSM1001870
		GSM1001871
		GSM1001872
		GSM1001873
		GSM1001799
		GSM1001800
		GSM1001801
		GSM1001803
		GSM1001802
		GSM1001789
		GSM1001790
		GSM1001791
		GSM1001792
		GSM1001793
		GSM1001809
		GSM1001810
		GSM1001811
		GSM1001812
		GSM1001813
GDS5067	GSM1169207	GSM1169213	Analysis of hypoxic A549 cells treated with oligooxopiperazines (OOPs) BB2-125, BB2-162, and BB2-282. OOPs are designed mimics of a key α-helical domain at the interface of hypoxia-inducible factor 1α (HIF1α) and coactivator p300. Results provide insight into the effect of OOPs on HIF signaling.	GPL6244: [HuGene-1_0-st] Affymetrix Human Gene 1.0 ST Array [transcript (gene) version]	Lao BB, Grishagin I, Mesallati H, Brewer TF et al. In vivo modulation of hypoxia-inducible signaling by topographical helix mimetics. Proc Natl Acad Sci U S A 2014 May 27;111(21):7531-6. PMID: 24821806	GSE48134
	GSM1169208	GSM1169214
	GSM1169210	GSM1169215
	GSM1169211	GSM1169216
	GSM1169212	GSM1169217
		GSM1169218
		GSM1169219
		GSM1169220
		GSM1169221
GDS5206	GSM1299152	GSM1299155	Analysis of A549 cells treated with SiO2 NPs (diameters of 9nm and 18nm) and examined after 3hr and 22hr recovery times. Coated nanomaterials (e.g., SiO2 NPs) agglomerate less and are, thus, more easily inhalable. Results provide molecular insight into molecular basis of nanotoxicological effects.	GPL6480: Agilent-014850 Whole Human Genome Microarray 4x44K G4112F (Probe Name version)	Fede C, Millino C, Pacchioni B, Celegato B et al. Altered gene transcription in human cells treated with Ludox® silica nanoparticles. Int J Environ Res Public Health 2014 Aug 28;11(9):8867-90. PMID: 25170680	GSE53700
	GSM1299153	GSM1299156
	GSM1299154	GSM1299157
	GSM1299158	GSM1299161
	GSM1299159	GSM1299162
	GSM1299160	GSM1299163
	GSM1299164	GSM1299149
	GSM1299165	GSM1299150
	GSM1299166	GSM1299151
GDS5247	GSM540420	GSM540423	Analysis of cisplatin-resistant lung cancer cells derived from the non-small cell lung cancer (NSCLC) cell line H460. Results provide insight into the molecular mechanisms underlying the development of cisplatin resistance in NSCLC.	GPL6244: [HuGene-1_0-st] Affymetrix Human Gene 1.0 ST Array [transcript (gene) version]	Sun Y, Zheng S, Torossian A, Speirs CK et al. Role of insulin-like growth factor-1 signaling pathway in cisplatin-resistant lung cancer cells. Int J Radiat Oncol Biol Phys 2012 Mar 1;82(3):e563-72. PMID: 22197230	GSE21656
	GSM540421	GSM540424
	GSM540422	GSM540425
GDS5418	GSM1370129	GSM1370133	Analysis of highly glycolytic A549 lung cancer cells depleted for steroid receptor coactivator SRC-1 and grown in the absence of glucose. SRC-1 promotes gluconeogenesis and glycemia. Results provide insight into the role of SRC-1 in glycolytic cancer cells undergoing glucose deprivation.	GPL570: [HG-U133_Plus_2] Affymetrix Human Genome U133 Plus 2.0 Array	Motamed M, Rajapakshe KI, Hartig SM, Coarfa C et al. Steroid receptor coactivator 1 is an integrator of glucose and NAD+/NADH homeostasis. Mol Endocrinol 2014 Mar;28(3):395-405. PMID: 24438340	GSE56843
	GSM1370130	GSM1370134
	GSM1370131	GSM1370135
	GSM1370132	GSM1370136
