# Supplementary material for: Signatures of Co-Deregulated Genes and Their Transcriptional Regulators in Lung Cancer
Source: Int J Mol Sci. 2022 Sep 18;23(18):10933. doi: 10.3390/ijms231810933 (PMC9504879; doi:10.3390/ijms231810933)
Supplement: Supplementary file 1 [file ijms-23-10933-s001.zip › Table S3.xlsx]

## Sheet: Table S3
Table S3: Gene Ontology (GO) annotations significantly associated with the co-DEGs in lung cancer versus the normal mucosa. The terms are sorted according to the combined score between the Benjamini-Hochberg (BH)-adjusted p-value and the z-score of the deviation from the expected rank.
Co-upregulated genes (Biological Process)
Term	Overlap	P-value	Adjusted P-value	Old P-value	Old Adjusted P-value	Odds Ratio	Combined Score	Genes
immune response-regulating cell surface receptor signaling pathway (GO:0002768)	2/14	8.58304e-05	0.00375508	0	0	184.889	1731.14	PIGR;CD24
cellular response to testosterone stimulus (GO:0071394)	1/5	0.00499044	0.0421207	0	0	262.842	1393.12	SPP1
renal filtration cell differentiation (GO:0061318)	1/6	0.00598569	0.0421207	0	0	210.263	1076.21	CD24
bundle of His cell-Purkinje myocyte adhesion involved in cell communication (GO:0086073)	1/22	0.00598569	0.0421207	0	0	210.263	1076.21	DSP
ventricular compact myocardium morphogenesis (GO:0003223)	1/22	0.00598569	0.0421207	0	0	210.263	1076.21	DSP
response to testosterone (GO:0033574)	1/22	0.00598569	0.0421207	0	0	210.263	1076.21	SPP1
negative regulation of neuron migration (GO:2001223)	1/22	0.00598569	0.0421207	0	0	210.263	1076.21	COL3A1
glomerular epithelial cell differentiation (GO:0072311)	1/22	0.00598569	0.0421207	0	0	210.263	1076.21	CD24
positive regulation of epithelial cell differentiation involved in kidney development (GO:2000698)	1/22	0.00598569	0.0421207	0	0	210.263	1076.21	CD24
skin morphogenesis (GO:0043589)	1/22	0.00698	0.0421207	0	0	175.211	869.869	COL1A2
Co-upregulated genes (Molecular Function)
Term	Overlap	P-value	Adjusted P-value	Old P-value	Old Adjusted P-value	Odds Ratio	Combined Score	Genes
platelet-derived growth factor binding (GO:0048407)	2/11	5.19687e-05	0.00109134	0	0	246.556	2432.24	COL3A1;COL1A2
cell adhesive protein binding involved in bundle of His cell-Purkinje myocyte communication (GO:0086083)	1/5	0.00499044	0.0428256	0	0	262.842	1393.12	DSP
protein binding involved in heterotypic cell-cell adhesion (GO:0086080)	1/10	0.00995725	0.0522756	0	0	116.789	538.336	DSP
protein tyrosine kinase activator activity (GO:0030296)	1/19	0.0188382	0.0791205	0	0	58.3684	231.832	CD24
epidermal growth factor receptor binding (GO:0005154)	1/26	0.0256933	0.0899265	0	0	42.0105	153.823	AGR2
ribonuclease activity (GO:0004540)	1/66	0.0640005	0.134401	0	0	16.1255	44.3268	AZGP1
nuclease activity (GO:0004518)	1/60	0.0583471	0.134401	0	0	17.7707	50.4928	AZGP1
protein kinase C binding (GO:0005080)	1/45	0.0440713	0.132214	0	0	23.8469	74.4487	DSP
Co-upregulated genes (Cellular Component)
Term	Overlap	P-value	Adjusted P-value	Old P-value	Old Adjusted P-value	Odds Ratio	Combined Score	Genes
Sec61 translocon complex (GO:0005784)	1/5	0.00499044	0.0432505	0	0	262.842	1393.12	SSR4
anchored component of external side of plasma membrane (GO:0031362)	1/20	0.0198203	0.109608	0	0	55.2936	216.809	CD24
intrinsic component of external side of plasma membrane (GO:0031233)	1/24	0.0237393	0.109608	0	0	45.6682	170.827	CD24
intercalated disc (GO:0014704)	1/31	0.0305619	0.109608	0	0	35	122.08	DSP
cornified envelope (GO:0001533)	1/43	0.0421524	0.109608	0	0	24.985	79.114	DSP
anchored component of plasma membrane (GO:0046658)	1/46	0.0450293	0.109608	0	0	23.3158	72.2892	CD24
cell-cell contact zone (GO:0044291)	1/47	0.0459865	0.109608	0	0	22.8078	70.2344	DSP
intermediate filament (GO:0005882)	1/50	0.0488525	0.109608	0	0	21.4082	64.6301	DSP
endoplasmic reticulum lumen (GO:0005788)	3/285	0.0027274	0.0354562	0	0	12.3267	72.7816	COL3A1;COL1A2;SPP1
collagen-containing extracellular matrix (GO:0062023)	4/380	0.000488321	0.0126963	0	0	13.0346	99.3826	AZGP1;COL3A1;COL1A2;CTHRC1
Co-downregulated genes (Biological Process)
Term	Overlap	P-value	Adjusted P-value	Old P-value	Old Adjusted P-value	Odds Ratio	Combined Score	Genes
peptidyl-cysteine S-nitrosylation (GO:0018119)	2/5	1.49654e-05	0.000711687	0	0	578.899	6431.43	S100A9;S100A8
cellular defense response (GO:0006968)	3/49	3.06006e-05	0.00130971	0	0	59.0781	614.086	GNLY;PRF1;MNDA
leukocyte aggregation (GO:0070486)	2/8	4.18072e-05	0.00162668	0	0	289.406	2917.92	S100A9;S100A8
positive regulation of glial cell proliferation (GO:0060252)	1/5	0.00623494	0.0421098	0	0	208.031	1056.3	IL6
caveola assembly (GO:0070836)	1/5	0.00623494	0.0421098	0	0	208.031	1056.3	EMP2
cellular response to antibiotic (GO:0071236)	1/5	0.00623494	0.0421098	0	0	208.031	1056.3	CRIP1
negative regulation of vascular endothelial cell proliferation (GO:1905563)	1/5	0.00623494	0.0421098	0	0	208.031	1056.3	CCL2
peptidyl-cysteine modification (GO:0018198)	2/9	5.37111e-05	0.00176833	0	0	248.05	2438.8	S100A9;S100A8
regulation of type B pancreatic cell apoptotic process (GO:2000674)	1/5	0.00623494	0.0421098	0	0	208.031	1056.3	IL6
Co-downregulated genes (Molecular Function)
Term	Overlap	P-value	Adjusted P-value	Old P-value	Old Adjusted P-value	Odds Ratio	Combined Score	Genes
RAGE receptor binding (GO:0050786)	3/9	1.44189e-07	5.91174e-06	0	0	453.841	7148.97	S100A4;S100A9;S100A8
arachidonic acid binding (GO:0050544)	2/6	2.2431e-05	0.000306557	0	0	434.152	4647.63	S100A9;S100A8
icosatetraenoic acid binding (GO:0050543)	2/6	2.2431e-05	0.000306557	0	0	434.152	4647.63	S100A9;S100A8
icosanoid binding (GO:0050542)	2/7	3.13794e-05	0.000321639	0	0	347.304	3601.32	S100A9;S100A8
Toll-like receptor binding (GO:0035325)	2/11	8.19332e-05	0.000559877	0	0	192.908	1815.19	S100A9;S100A8
chemokine receptor binding (GO:0042379)	2/50	0.00177122	0.00726201	0	0	36.0996	228.73	CCL2;PPBP
interleukin-6 receptor binding (GO:0005138)	1/7	0.00871846	0.0255326	0	0	138.674	657.634	IL6
long-chain fatty acid binding (GO:0036041)	1/7	0.00871846	0.0255326	0	0	138.674	657.634	FABP4
hexose transmembrane transporter activity (GO:0015149)	1/15	0.0185931	0.0448423	0	0	59.4077	236.738	PPBP
CXCR chemokine receptor binding (GO:0045236)	1/17	0.021047	0.0479404	0	0	51.9766	200.681	PPBP
Co-downregulated genes (Cellular Component)
Term	Overlap	P-value	Adjusted P-value	Old P-value	Old Adjusted P-value	Odds Ratio	Combined Score	Genes
cytolytic granule (GO:0044194)	3/7	6.01771e-08	2.46726e-06	0	0	680.83	11319.5	GNLY;PRF1;GZMB
secretory granule lumen (GO:0034774)	6/316	2.03967e-06	4.18132e-05	0	0	20.0323	262.477	FCN1;CLEC3B;MNDA;PPBP;S100A9;S100A8
collagen-containing extracellular matrix (GO:0062023)	5/380	9.36611e-05	0.00128004	0	0	13.0667	121.204	FCN1;CLEC3B;S100A4;S100A9;S100A8
cytoplasmic vesicle lumen (GO:0060205)	3/115	0.000388378	0.00398087	0	0	24.1838	189.929	FCN1;S100A9;S100A8
lipid droplet (GO:0005811)	2/77	0.0041443	0.0283194	0	0	23.0725	126.576	FABP4;G0S2
phagocytic vesicle lumen (GO:0097013)	1/5	0.00623494	0.0365189	0	0	208.031	1056.3	GNLY
extrinsic component of external side of plasma membrane (GO:0031232)	1/8	0.00995799	0.0467435	0	0	118.857	547.858	FCN1
platelet dense granule (GO:0042827)	1/21	0.0259371	0.0664638	0	0	41.5729	151.828	CLEC3B
endocytic vesicle lumen (GO:0071682)	1/21	0.0259371	0.0664638	0	0	41.5729	151.828	GNLY
