# Supplementary material for: Signatures of Co-Deregulated Genes and Their Transcriptional Regulators in Lung Cancer
Source: Int J Mol Sci. 2022 Sep 18;23(18):10933. doi: 10.3390/ijms231810933 (PMC9504879; doi:10.3390/ijms231810933)
Supplement: Supplementary file 1 [file ijms-23-10933-s001.zip › Table S4.xlsx]

## Sheet: Table S4
Table S4: KEGG enrichment analysis for the co-DEGs in lung cancer vs the normal mucosa. The terms are sorted according to the combined score between the Benjamini-Hochberg (BH)-adjusted p-value and the z-score of the deviation from the expected rank.
Co-upregulated genes
Term	Overlap	P-value	Adjusted P-value	Old P-value	Old Adjusted P-value	Odds Ratio	Combined Score	Genes
Relaxin signaling pathway	3/129	0.000275787	0.00689469	0	0	27.8067	227.901	COL3A1;COL1A2;MMP1
ECM-receptor interaction	2/88	0.00345404	0.0234876	0	0	25.7028	145.689	COL1A2;SPP1
AGE-RAGE signaling pathway in diabetic complications	2/100	0.0044345	0.0234876	0	0	22.542	122.14	COL3A1;COL1A2
Amoebiasis	2/102	0.00460905	0.0234876	0	0	22.0889	118.832	COL3A1;COL1A2
Protein digestion and absorption	2/103	0.00469751	0.0234876	0	0	21.8691	117.234	COL3A1;COL1A2
Platelet activation	2/124	0.00673453	0.0280605	0	0	18.0856	90.4372	COL3A1;COL1A2
Focal adhesion	2/201	0.0169536	0.0539779	0	0	11.0447	45.0322	COL1A2;SPP1
Diabetic cardiomyopathy	2/203	0.0172729	0.0539779	0	0	10.9337	44.3755	COL3A1;COL1A2
Bladder cancer	1/41	0.0402298	0.100261	0	0	26.2368	84.3028	MMP1
Human papillomavirus infection	2/331	0.0426431	0.100261	0	0	6.63661	20.9378	COL1A2;SPP1
Intestinal immune network for IgA production	1/48	0.0469428	0.100261	0	0	22.3214	68.2772	PIGR
PI3K-Akt signaling pathway	2/354	0.0481253	0.100261	0	0	6.19571	18.7975	COL1A2;SPP1
GnRH secretion	1/64	0.0621196	0.119461	0	0	16.6391	46.235	SPP1
PPAR signaling pathway	1/74	0.0714882	0.123802	0	0	14.3526	37.8652	MMP1
Arrhythmogenic right ventricular cardiomyopathy	1/77	0.0742815	0.123802	0	0	13.7839	35.8368	DSP
Rheumatoid arthritis	1/93	0.0890443	0.130347	0	0	11.3776	27.518	MMP1
IL-17 signaling pathway	1/94	0.0899595	0.130347	0	0	11.2547	27.1057	MMP1
Hematopoietic cell lineage	1/99	0.0945224	0.130347	0	0	10.6778	25.188	CD24
Toll-like receptor signaling pathway	1/104	0.0990637	0.130347	0	0	10.1569	23.4826	SPP1
Apelin signaling pathway	1/137	0.128497	0.160622	0	0	7.67957	15.7573	SPP1
Protein processing in endoplasmic reticulum	1/171	0.157867	0.187936	0	0	6.13313	11.3218	SSR4
Proteoglycans in cancer	1/205	0.186294	0.211391	0	0	5.10217	8.57384	COL1A2
Lipid and atherosclerosis	1/215	0.19448	0.211391	0	0	4.86129	7.96001	MMP1
Coronavirus disease	1/232	0.208216	0.216892	0	0	4.49966	7.06076	MMP1
Pathways in cancer	1/531	0.416339	0.416339	0	0	1.93148	1.69247	MMP1
Co-downregulated genes
Term	Overlap	P-value	Adjusted P-value	Old P-value	Old Adjusted P-value	Odds Ratio	Combined Score	Genes
IL-17 signaling pathway	4/94	5.36596e-06	0.000370251	0	0	42.0847	510.716	IL6;CCL2;S100A9;S100A8
Graft-versus-host disease	3/42	1.91776e-05	0.000661627	0	0	69.7063	757.134	IL6;PRF1;GZMB
Viral protein interaction with cytokine and cytokine receptor	3/100	0.000257515	0.00592283	0	0	27.9447	230.947	IL6;CCL2;PPBP
Natural killer cell mediated cytotoxicity	3/131	0.0005684	0.0098049	0	0	21.1438	158.001	FCGR3B;PRF1;GZMB
Allograft rejection	2/38	0.00102584	0.0141565	0	0	48.1618	331.462	PRF1;GZMB
Type I diabetes mellitus	2/43	0.00131265	0.0150955	0	0	42.2778	280.543	PRF1;GZMB
Malaria	2/50	0.00177122	0.0171454	0	0	36.0996	228.73	IL6;CCL2
Autoimmune thyroid disease	2/53	0.00198788	0.0171454	0	0	33.971	211.323	PRF1;GZMB
Cytokine-cytokine receptor interaction	3/295	0.00574526	0.0411579	0	0	9.19194	47.4247	IL6;CCL2;PPBP
Rheumatoid arthritis	2/93	0.0059857	0.0411579	0	0	19.0005	97.2517	IL6;CCL2
AGE-RAGE signaling pathway in diabetic complications	2/100	0.00688907	0.0411579	0	0	17.6371	87.7942	IL6;CCL2
Chagas disease	2/102	0.00715789	0.0411579	0	0	17.2826	85.3681	IL6;CCL2
TNF signaling pathway	2/112	0.00857224	0.0454988	0	0	15.7036	74.7368	IL6;CCL2
Yersinia infection	2/137	0.0126051	0.0620727	0	0	12.7794	55.8926	IL6;CCL2
Apoptosis	2/142	0.0134941	0.0620727	0	0	12.3199	53.0433	PRF1;GZMB
Influenza A	2/172	0.0193759	0.0817143	0	0	10.1304	39.9517	IL6;CCL2
Tuberculosis	2/180	0.0210972	0.0817143	0	0	9.67123	37.3175	IL6;FCGR3B
NOD-like receptor signaling pathway	2/181	0.0213168	0.0817143	0	0	9.61671	37.0076	IL6;CCL2
Transcriptional misregulation in cancer	2/192	0.0237948	0.082092	0	0	9.05492	33.8499	IL6;GZMB
Chemokine signaling pathway	2/192	0.0237948	0.082092	0	0	9.05492	33.8499	CCL2;PPBP
Lipid and atherosclerosis	2/215	0.0293381	0.0963967	0	0	8.06777	28.4701	IL6;CCL2
Human cytomegalovirus infection	2/225	0.0318951	0.100035	0	0	7.70209	26.536	IL6;CCL2
Coronavirus disease	2/232	0.0337361	0.101208	0	0	7.46503	25.3004	IL6;CCL2
African trypanosomiasis	1 / 37	0.045264	0.130134	0	0	23.0775	71.4306	IL6
Intestinal immune network for IgA production	2 / 48	0.0583371	0.16101	0	0	17.6667	50.2001	IL6
Regulation of lipolysis in adipocytes	3 / 55	0.0665667	0.176091	0	0	15.3711	41.6489	FABP4
Legionellosis	4 / 57	0.0689053	0.176091	0	0	14.8207	39.6457	IL6
Viral myocarditis	5 / 60	0.0724027	0.178421	0	0	14.065	36.9277	PRF1
Cytosolic DNA-sensing pathway	6 / 63	0.0758875	0.179868	0	0	13.3824	34.5065	IL6
Inflammatory bowel disease	7 / 65	0.0782036	0.179868	0	0	12.9629	33.0351	IL6
PPAR signaling pathway	8 / 74	0.0885577	0.19233	0	0	11.3596	27.5368	FABP4
Pertussis	9 / 76	0.0908434	0.19233	0	0	11.0556	26.5181	IL6
Leishmaniasis	10 / 77	0.0919841	0.19233	0	0	10.9095	26.0317	FCGR3B
Hypertrophic cardiomyopathy	11 / 90	0.10669	0.195917	0	0	9.30993	20.834	IL6
TGF-beta signaling pathway	12 / 90	0.111168	0.195917	0	0	8.90771	19.5676	ID1
Staphylococcus aureus infection	13 / 95	0.112285	0.195917	0	0	8.8125	19.2704	FCGR3B
Fc gamma R-mediated phagocytosis	14 / 97	0.114513	0.195917	0	0	8.62804	18.6975	FCGR3B
Hematopoietic cell lineage	15 / 99	0.116736	0.195917	0	0	8.45111	18.1516	IL6
Amoebiasis	1/102	0.120061	0.195917	0	0	8.19884	17.3795	IL6
Toll-like receptor signaling pathway	1/104	0.122271	0.195917	0	0	8.03883	16.8937	IL6
C-type lectin receptor signaling pathway	1/104	0.122271	0.195917	0	0	8.03883	16.8937	IL6
Th17 cell differentiation	1/107	0.125576	0.195917	0	0	7.81014	16.2049	IL6
Insulin resistance	1/108	0.126674	0.195917	0	0	7.73676	15.9852	IL6
Herpes simplex virus 1 infection	2/498	0.127652	0.195917	0	0	3.41497	7.02955	IL6;CCL2
HIF-1 signaling pathway	1/109	0.127772	0.195917	0	0	7.66474	15.7703	IL6
Osteoclast differentiation	1/127	0.147304	0.220925	0	0	6.56382	12.5714	FCGR3B
FoxO signaling pathway	1/131	0.151587	0.220925	0	0	6.36058	11.9999	IL6
Systemic lupus erythematosus	1/135	0.155849	0.220925	0	0	6.16947	11.4682	FCGR3B
Measles	1/139	0.160091	0.220925	0	0	5.98943	10.9727	IL6
Fluid shear stress and atherosclerosis	1/139	0.160091	0.220925	0	0	5.98943	10.9727	CCL2
Signaling pathways regulating pluripotency of stem cells	1/143	0.164312	0.222304	0	0	5.81954	10.51	ID1
Phagosome	1/152	0.173735	0.224086	0	0	5.4702	9.57406	FCGR3B
Non-alcoholic fatty liver disease	1/155	0.176854	0.224086	0	0	5.36282	9.29073	IL6
Cellular senescence	1/156	0.177891	0.224086	0	0	5.32796	9.19917	IL6
JAK-STAT signaling pathway	1/162	0.184086	0.224086	0	0	5.12785	8.67812	IL6
Hepatitis B	1/162	0.184086	0.224086	0	0	5.12785	8.67812	IL6
Hippo signaling pathway	1/163	0.185115	0.224086	0	0	5.09594	8.59573	ID1
Neutrophil extracellular trap formation	1/189	0.211416	0.251512	0	0	4.38542	6.81462	FCGR3B
Kaposi sarcoma-associated herpesvirus infection	1/193	0.215389	0.251896	0	0	4.29319	6.59137	IL6
Pathogenic Escherichia coli infection	1/197	0.219343	0.252245	0	0	4.20472	6.37906	IL6
Epstein-Barr virus infection	1/202	0.224259	0.25367	0	0	4.09909	6.12795	IL6
Rap1 signaling pathway	1/210	0.232062	0.258263	0	0	3.94059	5.75622	ID1
Human T-cell leukemia virus 1 infection	1/219	0.240751	0.26368	0	0	3.77619	5.37726	IL6
Salmonella infection	1/249	0.269037	0.290055	0	0	3.31435	4.35143	IL6
Prion disease	1/273	0.290935	0.308838	0	0	3.01823	3.72648	IL6
PI3K-Akt signaling pathway	1/354	0.360285	0.376662	0	0	2.3161	2.36441	IL6
Alzheimer disease	1/369	0.372392	0.383508	0	0	2.22	2.19293	IL6
Pathways of neurodegeneration	1/475	0.45189	0.458535	0	0	1.71422	1.36164	IL6
Pathways in cancer	1/531	0.48989	0.48989	0	0	1.52869	1.09084	IL6
