# Supplementary material for: Signatures of Co-Deregulated Genes and Their Transcriptional Regulators in Lung Cancer
Source: Int J Mol Sci. 2022 Sep 18;23(18):10933. doi: 10.3390/ijms231810933 (PMC9504879; doi:10.3390/ijms231810933)
Supplement: Supplementary file 1 [file ijms-23-10933-s001.zip › Table S5.xlsx]

## Sheet: Table S5
Table S5: Protein-protein interaction (PPI) sub-network around proteins encoded by the co-upregulated genes in lung cancer vs the normal mucosa.
X2K
Rank	Transcription Factor	Hypergeometric p-value	Z-score	Combined score
1	SOX2	0.008321	0	0
2	RAD21	0.03117	0	0
3	NANOG	0.04418	0	0
4	ZKSCAN1	0.06782	0	0
5	CTCF	0.07523	0	0
6	FOSL2	0.1083	0	0
7	TCF3	0.1113	0	0
8	EZH2	0.1295	0	0
9	IRF1	0.1427	0	0
10	SMC3	0.1455	0	0
11	TP53	0.1705	0	0
12	SALL4	0.188	0	0
13	TP63	0.1911	0	0
14	TCF7L2	0.2912	0	0
15	SMAD4	0.2916	0	0
16	FOS	0.3138	0	0
17	ZBTB33	0.3403	0	0
18	KLF4	0.4458	0	0
19	SP2	0.4481	0	0
20	NFE2L2	0.4576	0	0
21	PBX3	0.5351	0	0
22	HNF4A	0.5371	0	0
23	SUZ12	0.6434	0	0
24	MAX	0.7239	0	0
25	ZBTB7A	0.7436	0	0
26	CREB1	0.7528	0	0
27	NFYA	0.7548	0	0
28	YY1	0.8266	0	0
29	BRCA1	0.8757	0	0
30	E2F6	0.8781	0	0
31	NFYB	0.9141	0	0
KEA
Rank	Protein Kinase	Hypergeometric p-value	Z-score	Combined score
1	CDK1	1.127e-07	0	0
2	CSNK2A1	2.256e-07	0	0
3	MAPK14	3.555e-07	0	0
4	CDK2	7.18e-07	0	0
5	PLK1	3.188e-05	0	0
6	DNAPK	3.193e-05	0	0
7	AKT1	7.525e-05	0	0
8	GSK3B	8.275e-05	0	0
9	CDK4	9.536e-05	0	0
10	ATM	0.001297	0	0
11	AURKB	0.001783	0	0
12	CDC2	0.002498	0	0
13	CHEK1	0.005971	0	0
14	HASPIN	0.006718	0	0
15	TGM2	0.006718	0	0
16	MAPK1	0.0111	0	0
17	CSNK2A2	0.01185	0	0
18	MAP3K20	0.01339	0	0
19	JAK2	0.01401	0	0
20	RPS6KA3	0.01574	0	0
21	CSNK1E	0.01877	0	0
22	PKBALPHA	0.0358	0	0
23	MAPK8	0.04278	0	0
24	TAOK3	0.06209	0	0
25	ATR	0.06468	0	0
26	ROR1	0.06526	0	0
27	NEK3	0.06841	0	0
28	MAP3K14	0.07026	0	0
29	PIK3CG	0.07155	0	0
30	GSG2	0.07155	0	0
31	HIPK1	0.07468	0	0
32	MAP3K10	0.07468	0	0
33	TLK1	0.07468	0	0
34	AURKC	0.07781	0	0
35	HIPK2	0.07989	0	0
36	PBK	0.08092	0	0
37	RPS6KA4	0.08092	0	0
38	PAK5	0.08092	0	0
39	MAP3K2	0.08092	0	0
40	MARK3	0.08402	0	0
41	VRK1	0.08711	0	0
42	MOS	0.08711	0	0
43	GSK3BETA	0.08788	0	0
44	CDC7	0.09327	0	0
45	CDK8	0.09327	0	0
46	JAK3	0.09633	0	0
47	CDK6	0.09633	0	0
48	STK3	0.09633	0	0
49	JAK1	0.09938	0	0
50	PKN1	0.1024	0	0
51	PLK2	0.1055	0	0
52	PLK3	0.1264	0	0
53	PRKAA2	0.1294	0	0
54	RPS6KA5	0.1323	0	0
55	PKR	0.1352	0	0
56	MET	0.1382	0	0
57	PRKD2	0.144	0	0
58	CSNK1D	0.144	0	0
59	PTK2	0.1469	0	0
60	NEK2	0.1498	0	0
61	PRKCI	0.1526	0	0
62	GSK3ALPHA	0.1612	0	0
63	PIM1	0.1669	0	0
64	ABL	0.1781	0	0
65	AKT2	0.1865	0	0
66	CK2ALPHA	0.1939	0	0
67	MAP3K8	0.2002	0	0
68	PRKCQ	0.2029	0	0
69	MAP2K1	0.219	0	0
70	ROCK1	0.219	0	0
71	AURORAB	0.2321	0	0
72	PRKCE	0.2399	0	0
73	IKBKE	0.2399	0	0
74	RPS6KA1	0.2399	0	0
75	CSNK1A1	0.2425	0	0
76	AURKA	0.2477	0	0
77	IKBKB	0.2629	0	0
78	MAPK3	0.2816	0	0
79	PRKDC	0.3139	0	0
80	MTOR	0.3185	0	0
81	PAK1	0.3324	0	0
82	RAF1	0.3614	0	0
83	PKCALPHA	0.3614	0	0
84	PRKCD	0.3893	0	0
85	ERK2	0.4119	0	0
86	LYN	0.416	0	0
87	ERK1	0.4279	0	0
88	LCK	0.4338	0	0
89	ABL1	0.4357	0	0
90	CDK5	0.4733	0	0
91	EGFR	0.4787	0	0
92	PRKCB	0.5085	0	0
93	PRKCA	0.6181	0	0
94	SRC	0.8066	0	0
95	PRKACA	0.9773	0	0
