# Supplementary material for: Signatures of Co-Deregulated Genes and Their Transcriptional Regulators in Lung Cancer
Source: Int J Mol Sci. 2022 Sep 18;23(18):10933. doi: 10.3390/ijms231810933 (PMC9504879; doi:10.3390/ijms231810933)
Supplement: Supplementary file 1 [file ijms-23-10933-s001.zip › Table S6.xlsx]

## Sheet: Table S6
Table S6: Protein-protein interaction (PPI) sub-network around proteins encoded by the co-downregulated genes in LC vs the normal mucosa
X2K
Rank	Transcription Factor	Hypergeometric p-value	Z-score	Combined score
1	SOX2	0.008321	0	0
2	RAD21	0.03117	0	0
3	NANOG	0.04418	0	0
4	ZKSCAN1	0.06782	0	0
5	CTCF	0.07523	0	0
6	FOSL2	0.1083	0	0
7	TCF3	0.1113	0	0
8	EZH2	0.1295	0	0
9	IRF1	0.1427	0	0
10	SMC3	0.1455	0	0
11	TP53	0.1705	0	0
12	SALL4	0.188	0	0
13	TP63	0.1911	0	0
14	TCF7L2	0.2912	0	0
15	SMAD4	0.2916	0	0
16	FOS	0.3138	0	0
17	ZBTB33	0.3403	0	0
18	KLF4	0.4458	0	0
19	SP2	0.4481	0	0
20	NFE2L2	0.4576	0	0
21	PBX3	0.5351	0	0
22	HNF4A	0.5371	0	0
23	SUZ12	0.6434	0	0
24	MAX	0.7239	0	0
25	ZBTB7A	0.7436	0	0
26	CREB1	0.7528	0	0
27	NFYA	0.7548	0	0
28	YY1	0.8266	0	0
29	BRCA1	0.8757	0	0
30	E2F6	0.8781	0	0
31	NFYB	0.9141	0	0
KEA
Rank	Protein Kinase	Hypergeometric p-value	Z-score	Combined score
1	MAPK1	7.532e-17	0	0
2	HIPK2	8.926e-16	0	0
3	GSK3B	3.289e-14	0	0
4	MAPK3	4.240e-14	0	0
5	ERK1	3.045e-11	0	0
6	CSNK2A1	4.219e-11	0	0
7	MAPK14	4.877e-11	0	0
8	CK2ALPHA	5.590e-11	0	0
9	ERK2	2.116e-9	0	0
10	CDK1	2.791e-9	0	0
11	MAPK8	2.921e-9	0	0
12	CK2	1.896e-8	0	0
13	AKT1	2.695e-8	0	0
14	CDK4	6.297e-8	0	0
15	PKBALPHA	8.411e-8	0	0
16	JNK1	1.498e-7	0	0
17	ATM	3.550e-7	0	0
18	ABL1	4.147e-7	0	0
19	DNAPK	8.223e-7	0	0
20	SRC	9.158e-7	0	0
21	CDK2	3.076e-06	0	0
22	RAF1	3.704e-06	0	0
23	TGFBR2	5.816e-06	0	0
24	GSK3BETA	8.542e-06	0	0
25	PRKCA	1.45e-05	0	0
26	IKK	3.694e-05	0	0
27	CDC2	5.509e-05	0	0
28	IKKALPHA	8.754e-05	0	0
29	PRKACA	9.72e-05	0	0
30	PRKCI	0.0001011	0	0
31	GSK3ALPHA	0.0001318	0	0
32	PRKCZ	0.0001323	0	0
33	GSK	0.0001734	0	0
34	CDK6	0.000196	0	0
35	JNK2	0.0002475	0	0
36	PKD1	0.0002877	0	0
37	IKBKE	0.0009263	0	0
38	CSNK1A1	0.0009767	0	0
39	PKCEPSILON	0.0009767	0	0
40	PKBBETA	0.001061	0	0
41	CHUK	0.00114	0	0
42	RPS6KA3	0.001245	0	0
43	CAM	0.001602	0	0
44	PRKCD	0.002125	0	0
45	PKBGAMMA	0.002559	0	0
46	PRKAA1	0.003027	0	0
47	CDK3	0.003342	0	0
48	DNA	0.003373	0	0
49	PRKDC	0.003526	0	0
50	CHEK1	0.003681	0	0
51	CDK9	0.004258	0	0
52	PRKD1	0.004827	0	0
53	CAMKIV	0.00489	0	0
54	MAPK11	0.005204	0	0
55	MARK2	0.005694	0	0
56	AURORAA	0.007134	0	0
57	CDK5	0.007309	0	0
58	AURKA	0.007428	0	0
59	CK1ALPHA	0.008359	0	0
60	ACTR2B	0.008689	0	0
61	CSNK1D	0.008838	0	0
62	NLK	0.008838	0	0
63	IKKBETA	0.009355	0	0
64	IKBKB	0.009363	0	0
65	CHEK2	0.01101	0	0
66	PRKCB	0.01158	0	0
67	GSK3A	0.0116	0	0
68	MAP2K4	0.0122	0	0
69	PKCTHETA	0.0122	0	0
70	MAP3K7	0.01284	0	0
71	PIM1	0.01347	0	0
72	PDK	0.01477	0	0
73	PKMYT1	0.01616	0	0
74	PKAGAMMA	0.01694	0	0
75	FOXO3	0.01777	0	0
76	PIKFYVE	0.01777	0	0
77	MAP4K4	0.01909	0	0
78	CSNK1E	0.01924	0	0
79	CK2A2	0.02005	0	0
80	EPHB4	0.02063	0	0
81	PAK5	0.02222	0	0
82	PIM2	0.02386	0	0
83	MOK	0.02555	0	0
84	MELK	0.02729	0	0
85	CAMK2A	0.02782	0	0
86	LATS1	0.02907	0	0
87	MAP2K1	0.02911	0	0
88	EGFR	0.02971	0	0
89	DYRK1B	0.0309	0	0
90	UHMK1	0.0309	0	0
91	CAMK4	0.0309	0	0
92	LATS2	0.03277	0	0
93	PAK2	0.03324	0	0
94	BARK1	0.03432	0	0
95	CAMK1	0.03469	0	0
96	TBK1	0.03653	0	0
97	EIF2AK2	0.03665	0	0
98	YES1	0.03665	0	0
99	RPS6KA1	0.03767	0	0
100	CSNK2A2	0.03934	0	0
101	MAP3K5	0.04277	0	0
102	RET	0.04705	0	0
103	ALK	0.04705	0	0
104	AURKB	0.05222	0	0
105	PRKAA2	0.05375	0	0
106	MET	0.06077	0	0
107	PDHK2	0.06083	0	0
108	NIK	0.06083	0	0
109	PKCIOTA	0.06317	0	0
110	LCK	0.06489	0	0
111	RSK	0.06922	0	0
112	RSK3	0.06922	0	0
113	MAP2K3	0.07311	0	0
114	ERBB2	0.07967	0	0
115	MTOR	0.08299	0	0
116	JAK2	0.08351	0	0
117	PKAALPHA	0.08467	0	0
118	TRRAP	0.08577	0	0
119	MAPK10	0.09158	0	0
120	PAK1	0.09329	0	0
121	PKC	0.09393	0	0
122	ATR	0.1004	0	0
123	JNK3	0.102	0	0
124	TGFBR1	0.1055	0	0
125	BRD2	0.1101	0	0
126	ADRBK1	0.1101	0	0
127	PKCALPHA	0.1173	0	0
128	P70S6K	0.118	0	0
129	MAP3K8	0.12	0	0
130	SGK1	0.12	0	0
131	BTK	0.1259	0	0
132	RPS6KB1	0.1289	0	0
133	PDHK1	0.1349	0	0
134	SYK	0.138	0	0
135	CDC42BPG	0.1491	0	0
136	AURORAB	0.1565	0	0
137	TAOK3	0.1567	0	0
138	BMP2K	0.1567	0	0
139	PTK7	0.1567	0	0
140	RYK	0.1567	0	0
141	LMTK3	0.1567	0	0
142	MAST1	0.1567	0	0
143	POMK	0.1567	0	0
144	INSR	0.1596	0	0
145	CDK12	0.1643	0	0
146	PKCETA	0.1643	0	0
147	MINK1	0.1643	0	0
148	BMPR1A	0.1643	0	0
149	ACVR2B	0.1643	0	0
150	WEE2	0.1643	0	0
151	PRKCE	0.1659	0	0
152	TYRO3	0.1717	0	0
153	DMPK	0.1717	0	0
154	PKN3	0.1717	0	0
155	PRPF4B	0.1717	0	0
156	PKA	0.1717	0	0
157	MARK4	0.1717	0	0
158	PRKD3	0.1792	0	0
159	PKN2	0.1792	0	0
160	PIM3	0.1792	0	0
161	FLT3	0.1792	0	0
162	TLK2	0.1792	0	0
163	MAPK15	0.1792	0	0
164	HIPK1	0.1865	0	0
165	MAP3K10	0.1865	0	0
166	SIK1	0.1865	0	0
167	STK38L	0.1865	0	0
168	CAMKK2	0.1865	0	0
169	MAPK6	0.1865	0	0
170	WEE1	0.1865	0	0
171	CDK16	0.1938	0	0
172	CSNK1G1	0.1938	0	0
173	MAP3K11	0.1938	0	0
174	MERTK	0.1938	0	0
175	MAPK9	0.1948	0	0
176	PBK	0.201	0	0
177	RPS6KA4	0.201	0	0
178	NUAK1	0.201	0	0
179	CAMKK1	0.201	0	0
180	MKNK2	0.201	0	0
181	NEK1	0.2081	0	0
182	EPHB3	0.2081	0	0
183	EPHA8	0.2081	0	0
184	VRK1	0.2152	0	0
185	STK38	0.2152	0	0
186	MAP4K1	0.2152	0	0
187	MOS	0.2152	0	0
188	ILK	0.2152	0	0
189	MKNK1	0.2152	0	0
190	PRKG2	0.2223	0	0
191	AKT3	0.2292	0	0
192	TNK2	0.2292	0	0
193	CDK8	0.2292	0	0
194	SGK3	0.2292	0	0
195	JAK3	0.2361	0	0
196	LKB1	0.2361	0	0
197	PTK6	0.2361	0	0
198	STK3	0.2361	0	0
199	GRK2	0.2361	0	0
200	MAPK7	0.2361	0	0
201	PRKACB	0.243	0	0
202	PDK1	0.243	0	0
203	CAMK2D	0.243	0	0
204	TEC	0.243	0	0
205	PLK1	0.2434	0	0
206	PKN1	0.2497	0	0
207	LRRK2	0.2497	0	0
208	AXL	0.2497	0	0
209	FYN	0.2545	0	0
210	DAPK1	0.2565	0	0
211	PLK2	0.2565	0	0
212	STK4	0.2631	0	0
213	BMPR1B	0.2631	0	0
214	DAPK3	0.2697	0	0
215	CSK	0.2697	0	0
216	PDGFRB	0.2697	0	0
217	PAK6	0.2763	0	0
218	PKG1CGKI	0.2828	0	0
219	ARAF	0.2956	0	0
220	PLK3	0.3019	0	0
221	DYRK2	0.3019	0	0
222	PDGFRBETA	0.3081	0	0
223	HCK	0.3081	0	0
224	KIT	0.3081	0	0
225	MAP2K2	0.3143	0	0
226	DYRK1A	0.3143	0	0
227	ABL2	0.3143	0	0
228	RPS6KA5	0.3143	0	0
229	PKR	0.3205	0	0
230	RIPK1	0.3205	0	0
231	MAP2K6	0.3326	0	0
232	PRKD2	0.3386	0	0
233	PAK3	0.3445	0	0
234	NEK2	0.3504	0	0
235	PDPK1	0.3504	0	0
236	CK1DELTA	0.3902	0	0
237	PLK4	0.3956	0	0
238	ERBB3	0.4118	0	0
239	LYN	0.4166	0	0
240	CAMKIIALPHA	0.4223	0	0
241	PRKCQ	0.4528	0	0
242	PRKG1	0.4528	0	0
243	MAPKAPK2	0.4577	0	0
244	TYK2	0.4864	0	0
245	PKCGAMMA	0.4864	0	0
246	MAPK13	0.491	0	0
247	CDK7	0.4956	0	0
248	PKC	0.5179	0	0
249	MAPK12	0.5392	0	0
250	TTK	0.6086	0	0
251	RIPK3	0.6361	0	0
252	MAP3K14	0.6882	0	0
253	MAP3K3	0.8165	0	0
