# Supplementary material for: Signatures of Co-Deregulated Genes and Their Transcriptional Regulators in Lung Cancer
Source: Int J Mol Sci. 2022 Sep 18;23(18):10933. doi: 10.3390/ijms231810933 (PMC9504879; doi:10.3390/ijms231810933)
Supplement: Supplementary file 1 [file ijms-23-10933-s001.zip › Table S7.xlsx]

## Sheet: Table S7
Table S7: Cmap analysis results of the co-upregulated and co-downregulated genes in lung cancer.
CMap co-upregulated genes
Term	Overlap	P-value	Adjusted P-value	Old P-value	Old Adjusted P-value	Odds Ratio	Combined Score	Genes
valproic acid-2674	4/100	2.68032e-06	0.00216838	0	0	51.7812	664.331	DSP;AZGP1;IGKV4-1;IGLV3-19
betonicine-3745	3/100	0.000129975	0.0525749	0	0	36.1728	323.681	PIGR;IGLJ3;COL3A1
tetryzoline-6069	2/100	0.0044345	0.0954324	0	0	22.542	122.14	IGLJ3;IGLV3-19
troglitazone-2692	2/100	0.0044345	0.0954324	0	0	22.542	122.14	PIGR;AZGP1
tamoxifen-2050	2/100	0.0044345	0.0954324	0	0	22.542	122.14	COL3A1;COL1A2
(-)-isoprenaline-4495	2/100	0.0044345	0.0954324	0	0	22.542	122.14	COL3A1;CD24
phthalylsulfathiazole-3371	2/100	0.0044345	0.0954324	0	0	22.542	122.14	IGLJ3;SPP1
fulvestrant-5598	2/100	0.0044345	0.0954324	0	0	22.542	122.14	COL3A1;S100A2
tropicamide-3722	2/100	0.0044345	0.0954324	0	0	22.542	122.14	PIGR;COL1A2
thioridazine-2690	2/100	0.0044345	0.0954324	0	0	22.542	122.14	AZGP1;SPP1
spiradoline-4375	2/100	0.0044345	0.0954324	0	0	22.542	122.14	IGLJ3;AZGP1
glibenclamide-3163	2/100	0.0044345	0.0954324	0	0	22.542	122.14	PIGR;S100A2
propafenone-2871	2/100	0.0044345	0.0954324	0	0	22.542	122.14	AZGP1;COL3A1
ketotifen-3200	2/100	0.0044345	0.0954324	0	0	22.542	122.14	PIGR;S100A2
clenbuterol-5631	2/100	0.0044345	0.0954324	0	0	22.542	122.14	AZGP1;IGLV3-19
phenazopyridine-2537	2/100	0.0044345	0.0954324	0	0	22.542	122.14	AGR2;CD24
hydrocortisone-6684	2/100	0.0044345	0.0954324	0	0	22.542	122.14	IGLJ3;COL1A2
myosmine-3634	2/100	0.0044345	0.0954324	0	0	22.542	122.14	AZGP1;COL1A2
geldanamycin-2688	2/100	0.0044345	0.0954324	0	0	22.542	122.14	AZGP1;COL1A2
solasodine-3924	2/100	0.0044345	0.0954324	0	0	22.542	122.14	IGLJ3;COL3A1
16-phenyltetranorprostaglandin E2-7546	2/100	0.0044345	0.0954324	0	0	22.542	122.14	COL3A1;CD24
norcyclobenzaprine-2830	2/100	0.0044345	0.0954324	0	0	22.542	122.14	IGLJ3;SPP1
meclozine-3285	2/100	0.0044345	0.0954324	0	0	22.542	122.14	PIGR;COL3A1
cefalotin-2517	2/100	0.0044345	0.0954324	0	0	22.542	122.14	COL1A2;CD24
flumequine-2276	2/100	0.0044345	0.0954324	0	0	22.542	122.14	PIGR;COL3A1
rimexolone-3516	2/100	0.0044345	0.0954324	0	0	22.542	122.14	IGLJ3;COL3A1
pipemidic acid-6752	2/100	0.0044345	0.0954324	0	0	22.542	122.14	IGLJ3;COL3A1
tolazoline-4262	2/100	0.0044345	0.0954324	0	0	22.542	122.14	IGLJ3;COL1A2
myosmine-2199	2/100	0.0044345	0.0954324	0	0	22.542	122.14	IGLJ3;COL1A2
moracizine-7297	2/100	0.0044345	0.0954324	0	0	22.542	122.14	COL3A1;SPP1
pheneticillin-6105	2/100	0.0044345	0.0954324	0	0	22.542	122.14	IGLJ3;COL3A1
foliosidine-4295	2/100	0.0044345	0.0954324	0	0	22.542	122.14	SPP1;CD24
metaraminol-2298	2/100	0.0044345	0.0954324	0	0	22.542	122.14	IGLJ3;COL1A2
sulpiride-4389	2/100	0.0044345	0.0954324	0	0	22.542	122.14	AZGP1;SPP1
apomorphine-6683	2/100	0.0044345	0.0954324	0	0	22.542	122.14	PIGR;COL1A2
betaxolol-4608	1/100	0.0954324	0.0954324	0	0	10.5694	24.831	COL3A1
thioridazine-1905	1/100	0.0954324	0.0954324	0	0	10.5694	24.831	AGR2
trimethadione-4086	1/100	0.0954324	0.0954324	0	0	10.5694	24.831	COL3A1
practolol-5664	1/100	0.0954324	0.0954324	0	0	10.5694	24.831	IGLJ3
CP-944629-7544	1/100	0.0954324	0.0954324	0	0	10.5694	24.831	S100A2
ribavirin-6521	1/100	0.0954324	0.0954324	0	0	10.5694	24.831	AZGP1
alimemazine-7235	1/100	0.0954324	0.0954324	0	0	10.5694	24.831	IGLJ3
nitrendipine-3087	1/100	0.0954324	0.0954324	0	0	10.5694	24.831	S100A2
estradiol-2701	1/100	0.0954324	0.0954324	0	0	10.5694	24.831	COL1A2
bephenium hydroxynaphthoate-3089	1/100	0.0954324	0.0954324	0	0	10.5694	24.831	MMP1
alpha-estradiol-762	1/100	0.0954324	0.0954324	0	0	10.5694	24.831	PIGR
methyldopa-5272	1/100	0.0954324	0.0954324	0	0	10.5694	24.831	COL1A2
lidoflazine-3201	1/100	0.0954324	0.0954324	0	0	10.5694	24.831	PIGR
tiapride-2292	1/100	0.0954324	0.0954324	0	0	10.5694	24.831	PIGR
sulpiride-1967	1/100	0.0954324	0.0954324	0	0	10.5694	24.831	CD24
moxisylyte-7015	1/100	0.0954324	0.0954324	0	0	10.5694	24.831	COL3A1
bambuterol-3199	1/100	0.0954324	0.0954324	0	0	10.5694	24.831	COL3A1
mephenytoin-5801	1/100	0.0954324	0.0954324	0	0	10.5694	24.831	IGLV3-19
trichostatin A-2672	1/100	0.0954324	0.0954324	0	0	10.5694	24.831	DSP
fulvestrant-367	1/100	0.0954324	0.0954324	0	0	10.5694	24.831	COL1A2
pyrazinamide-2839	1/100	0.0954324	0.0954324	0	0	10.5694	24.831	PIGR
Prestwick-984-4948	1/100	0.0954324	0.0954324	0	0	10.5694	24.831	IGLJ3
cefoxitin-2735	1/100	0.0954324	0.0954324	0	0	10.5694	24.831	IGLJ3
aciclovir-1543	1/100	0.0954324	0.0954324	0	0	10.5694	24.831	COL3A1
primidone-3065	1/100	0.0954324	0.0954324	0	0	10.5694	24.831	PIGR
harmalol-5495	1/100	0.0954324	0.0954324	0	0	10.5694	24.831	S100A2
levonorgestrel-3708	1/100	0.0954324	0.0954324	0	0	10.5694	24.831	IGLJ3
Prestwick-972-7266	1/100	0.0954324	0.0954324	0	0	10.5694	24.831	COL3A1
bephenium hydroxynaphthoate-5628	1/100	0.0954324	0.0954324	0	0	10.5694	24.831	AZGP1
pramocaine-3894	1/100	0.0954324	0.0954324	0	0	10.5694	24.831	IGLJ3
adipiodone-5510	1/100	0.0954324	0.0954324	0	0	10.5694	24.831	PIGR
Prestwick-857-4980	1/100	0.0954324	0.0954324	0	0	10.5694	24.831	S100A2
tretinoin-447	1/100	0.0954324	0.0954324	0	0	10.5694	24.831	COL1A2
josamycin-5692	1/100	0.0954324	0.0954324	0	0	10.5694	24.831	COL3A1
diethylstilbestrol-3812	1/100	0.0954324	0.0954324	0	0	10.5694	24.831	AZGP1
mycophenolic acid-2857	1/100	0.0954324	0.0954324	0	0	10.5694	24.831	S100A2
metoclopramide-2353	1/100	0.0954324	0.0954324	0	0	10.5694	24.831	IGLJ3
pyrvinium-870	1/100	0.0954324	0.0954324	0	0	10.5694	24.831	MMP1
alpha-estradiol-122	1/100	0.0954324	0.0954324	0	0	10.5694	24.831	PIGR
novobiocin-342	1/100	0.0954324	0.0954324	0	0	10.5694	24.831	AZGP1
benzethonium chloride-2508	1/100	0.0954324	0.0954324	0	0	10.5694	24.831	COL1A2
mecamylamine-3525	1/100	0.0954324	0.0954324	0	0	10.5694	24.831	IGLJ3
blebbistatin-954	1/100	0.0954324	0.0954324	0	0	10.5694	24.831	CD24
tropicamide-4280	1/100	0.0954324	0.0954324	0	0	10.5694	24.831	PIGR
haloperidol-6923	1/100	0.0954324	0.0954324	0	0	10.5694	24.831	IGLJ3
solasodine-4305	1/100	0.0954324	0.0954324	0	0	10.5694	24.831	AZGP1
etidronic acid-4387	1/100	0.0954324	0.0954324	0	0	10.5694	24.831	IGLJ3
trichostatin A-6709	1/100	0.0954324	0.0954324	0	0	10.5694	24.831	MMP1
sulfametoxydiazine-2712	1/100	0.0954324	0.0954324	0	0	10.5694	24.831	CD24
PNU-0230031-3735	1/100	0.0954324	0.0954324	0	0	10.5694	24.831	IGLJ3
todralazine-5087	1/100	0.0954324	0.0954324	0	0	10.5694	24.831	IGLV3-19
iobenguane-6002	1/100	0.0954324	0.0954324	0	0	10.5694	24.831	S100A2
BCB000038-7520	1/100	0.0954324	0.0954324	0	0	10.5694	24.831	CD24
alpha-estradiol-6169	1/100	0.0954324	0.0954324	0	0	10.5694	24.831	PIGR
betonicine-3642	1/100	0.0954324	0.0954324	0	0	10.5694	24.831	IGLJ3
iohexol-5704	1/100	0.0954324	0.0954324	0	0	10.5694	24.831	IGLJ3
fludrocortisone-3977	1/100	0.0954324	0.0954324	0	0	10.5694	24.831	IGLJ3
PNU-0251126-3692	1/100	0.0954324	0.0954324	0	0	10.5694	24.831	SPP1
benzamil-2200	1/100	0.0954324	0.0954324	0	0	10.5694	24.831	IGLJ3
perphenazine-5698	1/100	0.0954324	0.0954324	0	0	10.5694	24.831	COL3A1
hydroflumethiazide-7259	1/100	0.0954324	0.0954324	0	0	10.5694	24.831	SPP1
simvastatin-3002	1/100	0.0954324	0.0954324	0	0	10.5694	24.831	PIGR
tropicamide-3619	1/100	0.0954324	0.0954324	0	0	10.5694	24.831	PIGR
Prestwick-665-6041	1/100	0.0954324	0.0954324	0	0	10.5694	24.831	IGLV3-19
guaifenesin-3897	1/100	0.0954324	0.0954324	0	0	10.5694	24.831	SPP1
promazine-2173	1/100	0.0954324	0.0954324	0	0	10.5694	24.831	IGLJ3
4-hydroxyphenazone-4095	1/100	0.0954324	0.0954324	0	0	10.5694	24.831	PIGR
phenindione-7289	1/100	0.0954324	0.0954324	0	0	10.5694	24.831	SPP1
cinchonidine-7190	1/100	0.0954324	0.0954324	0	0	10.5694	24.831	CD24
Prestwick-674-4738	1/100	0.0954324	0.0954324	0	0	10.5694	24.831	AZGP1
sulfaguanidine-4839	1/100	0.0954324	0.0954324	0	0	10.5694	24.831	IGLJ3
monocrotaline-2749	1/100	0.0954324	0.0954324	0	0	10.5694	24.831	IGLV3-19
sulfamethoxazole-3667	1/100	0.0954324	0.0954324	0	0	10.5694	24.831	PIGR
cefsulodin-3328	1/100	0.0954324	0.0954324	0	0	10.5694	24.831	IGLJ3
pentolonium-2305	1/100	0.0954324	0.0954324	0	0	10.5694	24.831	PIGR
prochlorperazine-2675	1/100	0.0954324	0.0954324	0	0	10.5694	24.831	SPP1
bromperidol-1723	1/100	0.0954324	0.0954324	0	0	10.5694	24.831	AZGP1
tomatidine-2746	1/100	0.0954324	0.0954324	0	0	10.5694	24.831	PIGR
epivincamine-6838	1/100	0.0954324	0.0954324	0	0	10.5694	24.831	S100A2
tranexamic acid-5762	1/100	0.0954324	0.0954324	0	0	10.5694	24.831	COL3A1
mephenytoin-6275	1/100	0.0954324	0.0954324	0	0	10.5694	24.831	AZGP1
thalidomide-7288	1/100	0.0954324	0.0954324	0	0	10.5694	24.831	COL3A1
fenoprofen-3714	1/100	0.0954324	0.0954324	0	0	10.5694	24.831	IGLJ3
nizatidine-3047	1/100	0.0954324	0.0954324	0	0	10.5694	24.831	COL1A2
ampyrone-2249	1/100	0.0954324	0.0954324	0	0	10.5694	24.831	IGLJ3
liothyronine-3324	1/100	0.0954324	0.0954324	0	0	10.5694	24.831	COL1A2
citiolone-2176	1/100	0.0954324	0.0954324	0	0	10.5694	24.831	CD24
diprophylline-5063	1/100	0.0954324	0.0954324	0	0	10.5694	24.831	COL3A1
scriptaid-6896	1/100	0.0954324	0.0954324	0	0	10.5694	24.831	MMP1
myosmine-4759	1/100	0.0954324	0.0954324	0	0	10.5694	24.831	IGLJ3
nafcillin-3323	1/100	0.0954324	0.0954324	0	0	10.5694	24.831	PIGR
fluvastatin-3370	1/100	0.0954324	0.0954324	0	0	10.5694	24.831	IGLJ3
5253409-844	1/100	0.0954324	0.0954324	0	0	10.5694	24.831	S100A2
doxazosin-3024	1/100	0.0954324	0.0954324	0	0	10.5694	24.831	PIGR
laudanosine-7270	1/100	0.0954324	0.0954324	0	0	10.5694	24.831	COL3A1
simvastatin-3340	1/100	0.0954324	0.0954324	0	0	10.5694	24.831	PIGR
lithocholic acid-2571	1/100	0.0954324	0.0954324	0	0	10.5694	24.831	CD24
nystatin-2500	1/100	0.0954324	0.0954324	0	0	10.5694	24.831	SPP1
nifuroxazide-4253	1/100	0.0954324	0.0954324	0	0	10.5694	24.831	SPP1
proxymetacaine-3113	1/100	0.0954324	0.0954324	0	0	10.5694	24.831	COL1A2
proxyphylline-5993	1/100	0.0954324	0.0954324	0	0	10.5694	24.831	IGLJ3
doxylamine-4235	1/100	0.0954324	0.0954324	0	0	10.5694	24.831	COL1A2
zimeldine-4609	1/100	0.0954324	0.0954324	0	0	10.5694	24.831	IGLJ3
colchicine-3213	1/100	0.0954324	0.0954324	0	0	10.5694	24.831	S100A2
nortriptyline-2391	1/100	0.0954324	0.0954324	0	0	10.5694	24.831	CD24
terbutaline-3202	1/100	0.0954324	0.0954324	0	0	10.5694	24.831	COL3A1
tetroquinone-4159	1/100	0.0954324	0.0954324	0	0	10.5694	24.831	COL3A1
etiocholanolone-2204	1/100	0.0954324	0.0954324	0	0	10.5694	24.831	IGLJ3
trichostatin A-2721	1/100	0.0954324	0.0954324	0	0	10.5694	24.831	DSP
flucloxacillin-3128	1/100	0.0954324	0.0954324	0	0	10.5694	24.831	DSP
acacetin-3849	1/100	0.0954324	0.0954324	0	0	10.5694	24.831	PIGR
sirolimus-5927	1/100	0.0954324	0.0954324	0	0	10.5694	24.831	COL1A2
protriptyline-5438	1/100	0.0954324	0.0954324	0	0	10.5694	24.831	S100A2
famprofazone-6029	1/100	0.0954324	0.0954324	0	0	10.5694	24.831	SPP1
oxolamine-4969	1/100	0.0954324	0.0954324	0	0	10.5694	24.831	S100A2
prednisolone-2393	1/100	0.0954324	0.0954324	0	0	10.5694	24.831	IGLV3-19
bicuculline-4397	1/100	0.0954324	0.0954324	0	0	10.5694	24.831	PIGR
leflunomide-6102	1/100	0.0954324	0.0954324	0	0	10.5694	24.831	IGLJ3
meclofenoxate-3707	1/100	0.0954324	0.0954324	0	0	10.5694	24.831	IGLJ3
alpha-ergocryptine-4552	1/100	0.0954324	0.0954324	0	0	10.5694	24.831	COL1A2
neomycin-5867	1/100	0.0954324	0.0954324	0	0	10.5694	24.831	AZGP1
captopril-4410	1/100	0.0954324	0.0954324	0	0	10.5694	24.831	AZGP1
(-)-atenolol-6725	1/100	0.0954324	0.0954324	0	0	10.5694	24.831	IGLJ3
mafenide-5499	1/100	0.0954324	0.0954324	0	0	10.5694	24.831	IGLJ3
sirolimus-5980	1/100	0.0954324	0.0954324	0	0	10.5694	24.831	COL3A1
16,16-dimethylprostaglandin E2-6562	1/100	0.0954324	0.0954324	0	0	10.5694	24.831	CD24
(+)-isoprenaline-6663	1/100	0.0954324	0.0954324	0	0	10.5694	24.831	AZGP1
nizatidine-3385	1/100	0.0954324	0.0954324	0	0	10.5694	24.831	IGLJ3
MS-275-7074	1/100	0.0954324	0.0954324	0	0	10.5694	24.831	MMP1
etodolac-2091	1/100	0.0954324	0.0954324	0	0	10.5694	24.831	COL1A2
glimepiride-4973	1/100	0.0954324	0.0954324	0	0	10.5694	24.831	S100A2
acetylsalicylic acid-984	1/100	0.0954324	0.0954324	0	0	10.5694	24.831	COL3A1
paracetamol-5384	1/100	0.0954324	0.0954324	0	0	10.5694	24.831	IGLJ3
ciclosporin-4411	1/100	0.0954324	0.0954324	0	0	10.5694	24.831	AGR2
lincomycin-2380	1/100	0.0954324	0.0954324	0	0	10.5694	24.831	IGLJ3
isoconazole-5857	1/100	0.0954324	0.0954324	0	0	10.5694	24.831	COL1A2
prednisone-4400	1/100	0.0954324	0.0954324	0	0	10.5694	24.831	AZGP1
GW-8510-7085	1/100	0.0954324	0.0954324	0	0	10.5694	24.831	MMP1
seneciphylline-4822	1/100	0.0954324	0.0954324	0	0	10.5694	24.831	IGLJ3
celecoxib-206	1/100	0.0954324	0.0954324	0	0	10.5694	24.831	COL1A2
thalidomide-606	1/100	0.0954324	0.0954324	0	0	10.5694	24.831	COL3A1
prazosin-826	1/100	0.0954324	0.0954324	0	0	10.5694	24.831	IGLJ3
trichostatin A-4184	1/100	0.0954324	0.0954324	0	0	10.5694	24.831	MMP1
Prestwick-642-2815	1/100	0.0954324	0.0954324	0	0	10.5694	24.831	PIGR
tanespimycin-1225	1/100	0.0954324	0.0954324	0	0	10.5694	24.831	AGR2
pregnenolone-2856	1/100	0.0954324	0.0954324	0	0	10.5694	24.831	S100A2
protoveratrine A-6618	1/100	0.0954324	0.0954324	0	0	10.5694	24.831	PIGR
sirolimus-987	1/100	0.0954324	0.0954324	0	0	10.5694	24.831	MMP1
sirolimus-2702	1/100	0.0954324	0.0954324	0	0	10.5694	24.831	AZGP1
trichostatin A-6439	1/100	0.0954324	0.0954324	0	0	10.5694	24.831	MMP1
flunisolide-6023	1/100	0.0954324	0.0954324	0	0	10.5694	24.831	COL3A1
decitabine-920	1/100	0.0954324	0.0954324	0	0	10.5694	24.831	COL3A1
chlorcyclizine-3893	1/100	0.0954324	0.0954324	0	0	10.5694	24.831	IGLJ3
thiethylperazine-6154	1/100	0.0954324	0.0954324	0	0	10.5694	24.831	IGLV3-19
Prestwick-682-4984	1/100	0.0954324	0.0954324	0	0	10.5694	24.831	PIGR
fludrocortisone-2368	1/100	0.0954324	0.0954324	0	0	10.5694	24.831	SPP1
furaltadone-3756	1/100	0.0954324	0.0954324	0	0	10.5694	24.831	PIGR
iodixanol-3023	1/100	0.0954324	0.0954324	0	0	10.5694	24.831	IGLV3-19
0173570-0000-3693	1/100	0.0954324	0.0954324	0	0	10.5694	24.831	COL1A2
rosiglitazone-5593	1/100	0.0954324	0.0954324	0	0	10.5694	24.831	AZGP1
sulfaquinoxaline-2528	1/100	0.0954324	0.0954324	0	0	10.5694	24.831	AZGP1
oxprenolol-3568	1/100	0.0954324	0.0954324	0	0	10.5694	24.831	COL3A1
fluphenazine-2697	1/100	0.0954324	0.0954324	0	0	10.5694	24.831	AZGP1
niclosamide-1998	1/100	0.0954324	0.0954324	0	0	10.5694	24.831	SPP1
karakoline-3638	1/100	0.0954324	0.0954324	0	0	10.5694	24.831	AZGP1
butyl hydroxybenzoate-6446	1/100	0.0954324	0.0954324	0	0	10.5694	24.831	PIGR
cobalt chloride-379	1/100	0.0954324	0.0954324	0	0	10.5694	24.831	SPP1
metergoline-6744	1/100	0.0954324	0.0954324	0	0	10.5694	24.831	CD24
prilocaine-3624	1/100	0.0954324	0.0954324	0	0	10.5694	24.831	IGLJ3
trichostatin A-1234	1/100	0.0954324	0.0954324	0	0	10.5694	24.831	MMP1
nicotinic acid-3381	1/100	0.0954324	0.0954324	0	0	10.5694	24.831	IGLJ3
natamycin-6126	1/100	0.0954324	0.0954324	0	0	10.5694	24.831	IGLV3-19
naltrexone-6241	1/100	0.0954324	0.0954324	0	0	10.5694	24.831	AZGP1
sotalol-4160	1/100	0.0954324	0.0954324	0	0	10.5694	24.831	COL3A1
haloperidol-1041	1/100	0.0954324	0.0954324	0	0	10.5694	24.831	CD24
finasteride-4766	1/100	0.0954324	0.0954324	0	0	10.5694	24.831	COL3A1
genistein-5595	1/100	0.0954324	0.0954324	0	0	10.5694	24.831	SPP1
isocorydine-4505	1/100	0.0954324	0.0954324	0	0	10.5694	24.831	COL3A1
genistein-6194	1/100	0.0954324	0.0954324	0	0	10.5694	24.831	COL1A2
josamycin-4631	1/100	0.0954324	0.0954324	0	0	10.5694	24.831	COL3A1
estradiol-1666	1/100	0.0954324	0.0954324	0	0	10.5694	24.831	S100A2
LY-294002-5576	1/100	0.0954324	0.0954324	0	0	10.5694	24.831	PIGR
trichostatin A-7077	1/100	0.0954324	0.0954324	0	0	10.5694	24.831	MMP1
hydrocotarnine-1772	1/100	0.0954324	0.0954324	0	0	10.5694	24.831	MMP1
trichostatin A-7073	1/100	0.0954324	0.0954324	0	0	10.5694	24.831	MMP1
indoprofen-3007	1/100	0.0954324	0.0954324	0	0	10.5694	24.831	IGLV3-19
trichostatin A-3791	1/100	0.0954324	0.0954324	0	0	10.5694	24.831	MMP1
troglitazone-462	1/100	0.0954324	0.0954324	0	0	10.5694	24.831	PIGR
trichostatin A-5950	1/100	0.0954324	0.0954324	0	0	10.5694	24.831	MMP1
clozapine-4453	1/100	0.0954324	0.0954324	0	0	10.5694	24.831	PIGR
quercetin-4846	1/100	0.0954324	0.0954324	0	0	10.5694	24.831	PIGR
pyrithyldione-2740	1/100	0.0954324	0.0954324	0	0	10.5694	24.831	AZGP1
risperidone-3508	1/100	0.0954324	0.0954324	0	0	10.5694	24.831	IGLJ3
acacetin-3942	1/100	0.0954324	0.0954324	0	0	10.5694	24.831	IGLJ3
genistein-2695	1/100	0.0954324	0.0954324	0	0	10.5694	24.831	AZGP1
minocycline-2405	1/100	0.0954324	0.0954324	0	0	10.5694	24.831	IGLJ3
syrosingopine-5733	1/100	0.0954324	0.0954324	0	0	10.5694	24.831	CD24
praziquantel-3189	1/100	0.0954324	0.0954324	0	0	10.5694	24.831	S100A2
HNMPA-(AM)3-583	1/100	0.0954324	0.0954324	0	0	10.5694	24.831	COL1A2
flunisolide-2168	1/100	0.0954324	0.0954324	0	0	10.5694	24.831	CD24
velnacrine-6651	1/100	0.0954324	0.0954324	0	0	10.5694	24.831	AZGP1
alfaxalone-5451	1/100	0.0954324	0.0954324	0	0	10.5694	24.831	PIGR
betahistine-2472	1/100	0.0954324	0.0954324	0	0	10.5694	24.831	IGLJ3
mestranol-3346	1/100	0.0954324	0.0954324	0	0	10.5694	24.831	COL3A1
pyrithyldione-3482	1/100	0.0954324	0.0954324	0	0	10.5694	24.831	S100A2
valproic acid-4433	1/100	0.0954324	0.0954324	0	0	10.5694	24.831	COL1A2
tubocurarine chloride-5449	1/100	0.0954324	0.0954324	0	0	10.5694	24.831	S100A2
pirinixic acid-464	1/100	0.0954324	0.0954324	0	0	10.5694	24.831	PIGR
estradiol-4432	1/100	0.0954324	0.0954324	0	0	10.5694	24.831	COL3A1
spiperone-1559	1/100	0.0954324	0.0954324	0	0	10.5694	24.831	PIGR
perhexiline-5081	1/100	0.0954324	0.0954324	0	0	10.5694	24.831	COL3A1
lasalocid-3021	1/100	0.0954324	0.0954324	0	0	10.5694	24.831	SPP1
vorinostat-4444	1/100	0.0954324	0.0954324	0	0	10.5694	24.831	MMP1
spiramycin-4319	1/100	0.0954324	0.0954324	0	0	10.5694	24.831	COL1A2
atropine methonitrate-6495	1/100	0.0954324	0.0954324	0	0	10.5694	24.831	PIGR
lymecycline-3514	1/100	0.0954324	0.0954324	0	0	10.5694	24.831	IGLJ3
diethylcarbamazine-2394	1/100	0.0954324	0.0954324	0	0	10.5694	24.831	PIGR
homochlorcyclizine-2386	1/100	0.0954324	0.0954324	0	0	10.5694	24.831	SPP1
remoxipride-3124	1/100	0.0954324	0.0954324	0	0	10.5694	24.831	PIGR
quercetin-283	1/100	0.0954324	0.0954324	0	0	10.5694	24.831	AZGP1
flutamide-2358	1/100	0.0954324	0.0954324	0	0	10.5694	24.831	IGLJ3
glibenclamide-7202	1/100	0.0954324	0.0954324	0	0	10.5694	24.831	IGLJ3
vorinostat-2680	1/100	0.0954324	0.0954324	0	0	10.5694	24.831	DSP
natamycin-3548	1/100	0.0954324	0.0954324	0	0	10.5694	24.831	S100A2
diprophylline-5482	1/100	0.0954324	0.0954324	0	0	10.5694	24.831	IGLJ3
tracazolate-6619	1/100	0.0954324	0.0954324	0	0	10.5694	24.831	AZGP1
benzydamine-7169	1/100	0.0954324	0.0954324	0	0	10.5694	24.831	IGLJ3
clomipramine-6825	1/100	0.0954324	0.0954324	0	0	10.5694	24.831	AZGP1
procyclidine-2991	1/100	0.0954324	0.0954324	0	0	10.5694	24.831	PIGR
BCB000039-7510	1/100	0.0954324	0.0954324	0	0	10.5694	24.831	PIGR
phenformin-4747	1/100	0.0954324	0.0954324	0	0	10.5694	24.831	IGLJ3
lovastatin-2494	1/100	0.0954324	0.0954324	0	0	10.5694	24.831	IGLJ3
antimycin A-2261	1/100	0.0954324	0.0954324	0	0	10.5694	24.831	PIGR
valproic acid-348	1/100	0.0954324	0.0954324	0	0	10.5694	24.831	PIGR
valproic acid-347	1/100	0.0954324	0.0954324	0	0	10.5694	24.831	PIGR
beclometasone-4580	1/100	0.0954324	0.0954324	0	0	10.5694	24.831	COL3A1
fulvestrant-5202	1/100	0.0954324	0.0954324	0	0	10.5694	24.831	IGKV4-1
sulfamethoxypyridazine-3609	1/100	0.0954324	0.0954324	0	0	10.5694	24.831	IGLJ3
salbutamol-7376	1/100	0.0954324	0.0954324	0	0	10.5694	24.831	CD24
nifenazone-7314	1/100	0.0954324	0.0954324	0	0	10.5694	24.831	COL3A1
metronidazole-2003	1/100	0.0954324	0.0954324	0	0	10.5694	24.831	PIGR
cefaclor-2843	1/100	0.0954324	0.0954324	0	0	10.5694	24.831	S100A2
bisoprolol-6748	1/100	0.0954324	0.0954324	0	0	10.5694	24.831	COL3A1
fludrocortisone-281	1/100	0.0954324	0.0954324	0	0	10.5694	24.831	AZGP1
phenformin-2350	1/100	0.0954324	0.0954324	0	0	10.5694	24.831	CD24
nordihydroguaiaretic acid-2683	1/100	0.0954324	0.0954324	0	0	10.5694	24.831	COL1A2
sulfamerazine-3718	1/100	0.0954324	0.0954324	0	0	10.5694	24.831	IGLJ3
alvespimycin-4437	1/100	0.0954324	0.0954324	0	0	10.5694	24.831	COL3A1
hydralazine-2311	1/100	0.0954324	0.0954324	0	0	10.5694	24.831	IGLJ3
lomefloxacin-3723	1/100	0.0954324	0.0954324	0	0	10.5694	24.831	IGLJ3
fenoterol-6331	1/100	0.0954324	0.0954324	0	0	10.5694	24.831	CD24
mefloquine-2048	1/100	0.0954324	0.0954324	0	0	10.5694	24.831	MMP1
terguride-3082	1/100	0.0954324	0.0954324	0	0	10.5694	24.831	MMP1
mesalazine-3584	1/100	0.0954324	0.0954324	0	0	10.5694	24.831	S100A2
trichostatin A-5981	1/100	0.0954324	0.0954324	0	0	10.5694	24.831	MMP1
trichostatin A-4458	1/100	0.0954324	0.0954324	0	0	10.5694	24.831	MMP1
chrysin-3106	1/100	0.0954324	0.0954324	0	0	10.5694	24.831	MMP1
lynestrenol-6756	1/100	0.0954324	0.0954324	0	0	10.5694	24.831	COL3A1
diphenylpyraline-4299	1/100	0.0954324	0.0954324	0	0	10.5694	24.831	IGLJ3
nifenazone-1439	1/100	0.0954324	0.0954324	0	0	10.5694	24.831	PIGR
ampicillin-5408	1/100	0.0954324	0.0954324	0	0	10.5694	24.831	IGKV4-1
demeclocycline-2545	1/100	0.0954324	0.0954324	0	0	10.5694	24.831	AZGP1
salbutamol-2344	1/100	0.0954324	0.0954324	0	0	10.5694	24.831	CD24
dicycloverine-4405	1/100	0.0954324	0.0954324	0	0	10.5694	24.831	COL3A1
mephenesin-2304	1/100	0.0954324	0.0954324	0	0	10.5694	24.831	PIGR
spiramycin-2558	1/100	0.0954324	0.0954324	0	0	10.5694	24.831	PIGR
alpha-yohimbine-5800	1/100	0.0954324	0.0954324	0	0	10.5694	24.831	SPP1
amikacin-6715	1/100	0.0954324	0.0954324	0	0	10.5694	24.831	COL3A1
bromopride-4741	1/100	0.0954324	0.0954324	0	0	10.5694	24.831	AZGP1
trimethadione-2486	1/100	0.0954324	0.0954324	0	0	10.5694	24.831	PIGR
trichostatin A-3114	1/100	0.0954324	0.0954324	0	0	10.5694	24.831	DSP
suloctidil-6675	1/100	0.0954324	0.0954324	0	0	10.5694	24.831	PIGR
miconazole-1896	1/100	0.0954324	0.0954324	0	0	10.5694	24.831	CD24
spiperone-5777	1/100	0.0954324	0.0954324	0	0	10.5694	24.831	AGR2
valproic acid-2669	1/100	0.0954324	0.0954324	0	0	10.5694	24.831	DSP
mephenesin-4698	1/100	0.0954324	0.0954324	0	0	10.5694	24.831	AZGP1
valproic acid-2700	1/100	0.0954324	0.0954324	0	0	10.5694	24.831	COL1A2
chlorogenic acid-4024	1/100	0.0954324	0.0954324	0	0	10.5694	24.831	COL3A1
meclofenoxate-4729	1/100	0.0954324	0.0954324	0	0	10.5694	24.831	IGLJ3
haloperidol-5200	1/100	0.0954324	0.0954324	0	0	10.5694	24.831	IGLJ3
nafcillin-3983	1/100	0.0954324	0.0954324	0	0	10.5694	24.831	SPP1
midecamycin-6745	1/100	0.0954324	0.0954324	0	0	10.5694	24.831	PIGR
N6-methyladenosine-6732	1/100	0.0954324	0.0954324	0	0	10.5694	24.831	COL3A1
methylergometrine-6704	1/100	0.0954324	0.0954324	0	0	10.5694	24.831	COL1A2
diclofenamide-3027	1/100	0.0954324	0.0954324	0	0	10.5694	24.831	PIGR
methyldopa-5637	1/100	0.0954324	0.0954324	0	0	10.5694	24.831	IGLJ3
Prestwick-664-2178	1/100	0.0954324	0.0954324	0	0	10.5694	24.831	CD24
scriptaid-6919	1/100	0.0954324	0.0954324	0	0	10.5694	24.831	MMP1
nialamide-4525	1/100	0.0954324	0.0954324	0	0	10.5694	24.831	COL1A2
alfuzosin-3203	1/100	0.0954324	0.0954324	0	0	10.5694	24.831	COL3A1
indapamide-2322	1/100	0.0954324	0.0954324	0	0	10.5694	24.831	SPP1
tolazamide-4003	1/100	0.0954324	0.0954324	0	0	10.5694	24.831	COL3A1
6-benzylaminopurine-3726	1/100	0.0954324	0.0954324	0	0	10.5694	24.831	PIGR
cyproheptadine-6740	1/100	0.0954324	0.0954324	0	0	10.5694	24.831	IGLJ3
spectinomycin-4773	1/100	0.0954324	0.0954324	0	0	10.5694	24.831	IGLV3-19
chlorpromazine-6176	1/100	0.0954324	0.0954324	0	0	10.5694	24.831	COL3A1
SC-58125-542	1/100	0.0954324	0.0954324	0	0	10.5694	24.831	PIGR
dimethadione-4607	1/100	0.0954324	0.0954324	0	0	10.5694	24.831	IGLJ3
tiabendazole-4402	1/100	0.0954324	0.0954324	0	0	10.5694	24.831	IGLJ3
thioridazine-5227	1/100	0.0954324	0.0954324	0	0	10.5694	24.831	S100A2
MS-275-7084	1/100	0.0954324	0.0954324	0	0	10.5694	24.831	MMP1
genistein-1235	1/100	0.0954324	0.0954324	0	0	10.5694	24.831	COL1A2
alpha-estradiol-6930	1/100	0.0954324	0.0954324	0	0	10.5694	24.831	IGLJ3
chlorphenamine-6773	1/100	0.0954324	0.0954324	0	0	10.5694	24.831	S100A2
hexamethonium bromide-1901	1/100	0.0954324	0.0954324	0	0	10.5694	24.831	CD24
diphenylpyraline-3743	1/100	0.0954324	0.0954324	0	0	10.5694	24.831	COL1A2
levonorgestrel-4269	1/100	0.0954324	0.0954324	0	0	10.5694	24.831	IGKV4-1
promethazine-6477	1/100	0.0954324	0.0954324	0	0	10.5694	24.831	COL3A1
dl-alpha tocopherol-4961	1/100	0.0954324	0.0954324	0	0	10.5694	24.831	COL1A2
buflomedil-4258	1/100	0.0954324	0.0954324	0	0	10.5694	24.831	COL3A1
Prestwick-675-3682	1/100	0.0954324	0.0954324	0	0	10.5694	24.831	COL3A1
dexpropranolol-3553	1/100	0.0954324	0.0954324	0	0	10.5694	24.831	S100A2
isometheptene-5502	1/100	0.0954324	0.0954324	0	0	10.5694	24.831	S100A2
solasodine-2170	1/100	0.0954324	0.0954324	0	0	10.5694	24.831	IGLJ3
parbendazole-4357	1/100	0.0954324	0.0954324	0	0	10.5694	24.831	IGLJ3
trichostatin A-1793	1/100	0.0954324	0.0954324	0	0	10.5694	24.831	MMP1
furaltadone-3413	1/100	0.0954324	0.0954324	0	0	10.5694	24.831	IGLJ3
nipecotic acid-6500	1/100	0.0954324	0.0954324	0	0	10.5694	24.831	COL1A2
resveratrol-662	1/100	0.0954324	0.0954324	0	0	10.5694	24.831	CD24
fluocinonide-3933	1/100	0.0954324	0.0954324	0	0	10.5694	24.831	IGLJ3
trichostatin A-6736	1/100	0.0954324	0.0954324	0	0	10.5694	24.831	MMP1
chlormezanone-4636	1/100	0.0954324	0.0954324	0	0	10.5694	24.831	COL3A1
lovastatin-6633	1/100	0.0954324	0.0954324	0	0	10.5694	24.831	CD24
bepridil-4613	1/100	0.0954324	0.0954324	0	0	10.5694	24.831	COL3A1
dizocilpine-6223	1/100	0.0954324	0.0954324	0	0	10.5694	24.831	S100A2
6-benzylaminopurine-4748	1/100	0.0954324	0.0954324	0	0	10.5694	24.831	AZGP1
lidocaine-1499	1/100	0.0954324	0.0954324	0	0	10.5694	24.831	S100A2
doxorubicin-3291	1/100	0.0954324	0.0954324	0	0	10.5694	24.831	S100A2
thioridazine-1986	1/100	0.0954324	0.0954324	0	0	10.5694	24.831	SPP1
benzamil-3738	1/100	0.0954324	0.0954324	0	0	10.5694	24.831	PIGR
N-acetyl-L-leucine-5683	1/100	0.0954324	0.0954324	0	0	10.5694	24.831	COL1A2
methocarbamol-2274	1/100	0.0954324	0.0954324	0	0	10.5694	24.831	SPP1
trichostatin A-2137	1/100	0.0954324	0.0954324	0	0	10.5694	24.831	DSP
ceftazidime-5473	1/100	0.0954324	0.0954324	0	0	10.5694	24.831	COL1A2
aceclofenac-7269	1/100	0.0954324	0.0954324	0	0	10.5694	24.831	COL3A1
dexibuprofen-3094	1/100	0.0954324	0.0954324	0	0	10.5694	24.831	PIGR
perphenazine-1956	1/100	0.0954324	0.0954324	0	0	10.5694	24.831	MMP1
calcium pantothenate-4775	1/100	0.0954324	0.0954324	0	0	10.5694	24.831	IGLJ3
6-benzylaminopurine-2351	1/100	0.0954324	0.0954324	0	0	10.5694	24.831	AZGP1
dl-alpha tocopherol-6616	1/100	0.0954324	0.0954324	0	0	10.5694	24.831	IGLV3-19
PHA-00745360-4384	1/100	0.0954324	0.0954324	0	0	10.5694	24.831	IGLJ3
minoxidil-1496	1/100	0.0954324	0.0954324	0	0	10.5694	24.831	SPP1
troglitazone-5229	1/100	0.0954324	0.0954324	0	0	10.5694	24.831	COL3A1
cefalexin-5615	1/100	0.0954324	0.0954324	0	0	10.5694	24.831	IGLJ3
berberine-6791	1/100	0.0954324	0.0954324	0	0	10.5694	24.831	IGLJ3
dexamethasone-5797	1/100	0.0954324	0.0954324	0	0	10.5694	24.831	SPP1
trichostatin A-1891	1/100	0.0954324	0.0954324	0	0	10.5694	24.831	MMP1
clemizole-2339	1/100	0.0954324	0.0954324	0	0	10.5694	24.831	COL1A2
talampicillin-7254	1/100	0.0954324	0.0954324	0	0	10.5694	24.831	COL3A1
ticlopidine-4074	1/100	0.0954324	0.0954324	0	0	10.5694	24.831	PIGR
CP-690334-01-3823	1/100	0.0954324	0.0954324	0	0	10.5694	24.831	MMP1
hydroxyzine-6660	1/100	0.0954324	0.0954324	0	0	10.5694	24.831	COL1A2
CP-690334-01-3826	1/100	0.0954324	0.0954324	0	0	10.5694	24.831	PIGR
N-acetylmuramic acid-4406	1/100	0.0954324	0.0954324	0	0	10.5694	24.831	PIGR
pyrantel-2260	1/100	0.0954324	0.0954324	0	0	10.5694	24.831	PIGR
lansoprazole-6009	1/100	0.0954324	0.0954324	0	0	10.5694	24.831	S100A2
galantamine-4772	1/100	0.0954324	0.0954324	0	0	10.5694	24.831	IGLJ3
BCB000040-7493	1/100	0.0954324	0.0954324	0	0	10.5694	24.831	PIGR
tanespimycin-1006	1/100	0.0954324	0.0954324	0	0	10.5694	24.831	COL3A1
sulfanilamide-2709	1/100	0.0954324	0.0954324	0	0	10.5694	24.831	AGR2
trichlormethiazide-4783	1/100	0.0954324	0.0954324	0	0	10.5694	24.831	IGLJ3
ondansetron-3575	1/100	0.0954324	0.0954324	0	0	10.5694	24.831	S100A2
trichostatin A-2084	1/100	0.0954324	0.0954324	0	0	10.5694	24.831	MMP1
Prestwick-920-5056	1/100	0.0954324	0.0954324	0	0	10.5694	24.831	COL1A2
practolol-1587	1/100	0.0954324	0.0954324	0	0	10.5694	24.831	SPP1
fulvestrant-7495	1/100	0.0954324	0.0954324	0	0	10.5694	24.831	COL3A1
cyproheptadine-5340	1/100	0.0954324	0.0954324	0	0	10.5694	24.831	IGLJ3
chlortalidone-1581	1/100	0.0954324	0.0954324	0	0	10.5694	24.831	AZGP1
etilefrine-4590	1/100	0.0954324	0.0954324	0	0	10.5694	24.831	CD24
enalapril-7026	1/100	0.0954324	0.0954324	0	0	10.5694	24.831	S100A2
ketoprofen-3729	1/100	0.0954324	0.0954324	0	0	10.5694	24.831	IGLJ3
hycanthone-3229	1/100	0.0954324	0.0954324	0	0	10.5694	24.831	S100A2
trimetazidine-5479	1/100	0.0954324	0.0954324	0	0	10.5694	24.831	IGLJ3
S-propranolol-5444	1/100	0.0954324	0.0954324	0	0	10.5694	24.831	S100A2
CP-319743-7491	1/100	0.0954324	0.0954324	0	0	10.5694	24.831	COL3A1
iobenguane-2878	1/100	0.0954324	0.0954324	0	0	10.5694	24.831	S100A2
rofecoxib-463	1/100	0.0954324	0.0954324	0	0	10.5694	24.831	PIGR
eucatropine-3841	1/100	0.0954324	0.0954324	0	0	10.5694	24.831	PIGR
ethotoin-2196	1/100	0.0954324	0.0954324	0	0	10.5694	24.831	CD24
mephentermine-3685	1/100	0.0954324	0.0954324	0	0	10.5694	24.831	IGLJ3
pentetic acid-3049	1/100	0.0954324	0.0954324	0	0	10.5694	24.831	CD24
trapidil-3136	1/100	0.0954324	0.0954324	0	0	10.5694	24.831	S100A2
colchicine-4614	1/100	0.0954324	0.0954324	0	0	10.5694	24.831	COL3A1
trichostatin A-2208	1/100	0.0954324	0.0954324	0	0	10.5694	24.831	DSP
nipecotic acid-7296	1/100	0.0954324	0.0954324	0	0	10.5694	24.831	COL3A1
amodiaquine-6224	1/100	0.0954324	0.0954324	0	0	10.5694	24.831	COL3A1
trichostatin A-1951	1/100	0.0954324	0.0954324	0	0	10.5694	24.831	MMP1
fluphenazine-5880	1/100	0.0954324	0.0954324	0	0	10.5694	24.831	MMP1
carisoprodol-4955	1/100	0.0954324	0.0954324	0	0	10.5694	24.831	AZGP1
cinchonidine-2772	1/100	0.0954324	0.0954324	0	0	10.5694	24.831	COL3A1
lorglumide-3079	1/100	0.0954324	0.0954324	0	0	10.5694	24.831	COL1A2
trichostatin A-2375	1/100	0.0954324	0.0954324	0	0	10.5694	24.831	CD24
glipizide-4991	1/100	0.0954324	0.0954324	0	0	10.5694	24.831	AZGP1
metoprolol-2543	1/100	0.0954324	0.0954324	0	0	10.5694	24.831	AZGP1
piroxicam-1405	1/100	0.0954324	0.0954324	0	0	10.5694	24.831	IGLJ3
sulfachlorpyridazine-3944	1/100	0.0954324	0.0954324	0	0	10.5694	24.831	COL3A1
succinylsulfathiazole-2821	1/100	0.0954324	0.0954324	0	0	10.5694	24.831	PIGR
danazol-1954	1/100	0.0954324	0.0954324	0	0	10.5694	24.831	CD24
naftidrofuryl-5287	1/100	0.0954324	0.0954324	0	0	10.5694	24.831	CD24
alimemazine-5881	1/100	0.0954324	0.0954324	0	0	10.5694	24.831	SPP1
cinchonine-3988	1/100	0.0954324	0.0954324	0	0	10.5694	24.831	COL3A1
vorinostat-1220	1/100	0.0954324	0.0954324	0	0	10.5694	24.831	MMP1
suxibuzone-6065	1/100	0.0954324	0.0954324	0	0	10.5694	24.831	IGLV3-19
mephentermine-2563	1/100	0.0954324	0.0954324	0	0	10.5694	24.831	COL1A2
beclometasone-3001	1/100	0.0954324	0.0954324	0	0	10.5694	24.831	PIGR
trichostatin A-4348	1/100	0.0954324	0.0954324	0	0	10.5694	24.831	PIGR
pipenzolate bromide-4484	1/100	0.0954324	0.0954324	0	0	10.5694	24.831	IGLJ3
CP-690334-01-4383	1/100	0.0954324	0.0954324	0	0	10.5694	24.831	IGLJ3
theobromine-2995	1/100	0.0954324	0.0954324	0	0	10.5694	24.831	PIGR
hydrastine hydrochloride-2889	1/100	0.0954324	0.0954324	0	0	10.5694	24.831	AZGP1
crotamiton-3050	1/100	0.0954324	0.0954324	0	0	10.5694	24.831	CD24
sulfadiazine-5098	1/100	0.0954324	0.0954324	0	0	10.5694	24.831	IGLJ3
gemfibrozil-2113	1/100	0.0954324	0.0954324	0	0	10.5694	24.831	COL3A1
pyrazinamide-6617	1/100	0.0954324	0.0954324	0	0	10.5694	24.831	COL1A2
sirolimus-4431	1/100	0.0954324	0.0954324	0	0	10.5694	24.831	PIGR
bisacodyl-4616	1/100	0.0954324	0.0954324	0	0	10.5694	24.831	COL3A1
methazolamide-2733	1/100	0.0954324	0.0954324	0	0	10.5694	24.831	AZGP1
chloroquine-7012	1/100	0.0954324	0.0954324	0	0	10.5694	24.831	IGLJ3
sulindac-5528	1/100	0.0954324	0.0954324	0	0	10.5694	24.831	IGLJ3
eldeline-3750	1/100	0.0954324	0.0954324	0	0	10.5694	24.831	AZGP1
Prestwick-685-2188	1/100	0.0954324	0.0954324	0	0	10.5694	24.831	IGLJ3
etofylline-2256	1/100	0.0954324	0.0954324	0	0	10.5694	24.831	IGLV3-19
ramifenazone-5879	1/100	0.0954324	0.0954324	0	0	10.5694	24.831	COL3A1
astemizole-2049	1/100	0.0954324	0.0954324	0	0	10.5694	24.831	AGR2
gibberellic acid-2910	1/100	0.0954324	0.0954324	0	0	10.5694	24.831	COL1A2
methyldopate-4986	1/100	0.0954324	0.0954324	0	0	10.5694	24.831	S100A2
esculetin-3120	1/100	0.0954324	0.0954324	0	0	10.5694	24.831	MMP1
Prestwick-1085-6131	1/100	0.0954324	0.0954324	0	0	10.5694	24.831	COL1A2
cimetidine-4063	1/100	0.0954324	0.0954324	0	0	10.5694	24.831	COL3A1
0175029-0000-4713	1/100	0.0954324	0.0954324	0	0	10.5694	24.831	CD24
betulinic acid-4181	1/100	0.0954324	0.0954324	0	0	10.5694	24.831	PIGR
etidronic acid-3325	1/100	0.0954324	0.0954324	0	0	10.5694	24.831	COL3A1
phenelzine-3802	1/100	0.0954324	0.0954324	0	0	10.5694	24.831	PIGR
ketoconazole-5685	1/100	0.0954324	0.0954324	0	0	10.5694	24.831	AZGP1
Prestwick-665-3681	1/100	0.0954324	0.0954324	0	0	10.5694	24.831	PIGR
mitoxantrone-6755	1/100	0.0954324	0.0954324	0	0	10.5694	24.831	IGLJ3
convolamine-5876	1/100	0.0954324	0.0954324	0	0	10.5694	24.831	COL1A2
androsterone-2650	1/100	0.0954324	0.0954324	0	0	10.5694	24.831	PIGR
trichostatin A-6193	1/100	0.0954324	0.0954324	0	0	10.5694	24.831	DSP
trichostatin A-3688	1/100	0.0954324	0.0954324	0	0	10.5694	24.831	MMP1
sulfapyridine-6101	1/100	0.0954324	0.0954324	0	0	10.5694	24.831	IGLJ3
deptropine-5118	1/100	0.0954324	0.0954324	0	0	10.5694	24.831	IGLJ3
trichlormethiazide-2998	1/100	0.0954324	0.0954324	0	0	10.5694	24.831	COL1A2
clidinium bromide-2734	1/100	0.0954324	0.0954324	0	0	10.5694	24.831	AZGP1
ursodeoxycholic acid-3105	1/100	0.0954324	0.0954324	0	0	10.5694	24.831	CD24
trichostatin A-7555	1/100	0.0954324	0.0954324	0	0	10.5694	24.831	MMP1
suprofen-3005	1/100	0.0954324	0.0954324	0	0	10.5694	24.831	AZGP1
pinacidil-6356	1/100	0.0954324	0.0954324	0	0	10.5694	24.831	IGLJ3
foliosidine-2201	1/100	0.0954324	0.0954324	0	0	10.5694	24.831	IGLJ3
clioquinol-3084	1/100	0.0954324	0.0954324	0	0	10.5694	24.831	MMP1
yohimbine-6777	1/100	0.0954324	0.0954324	0	0	10.5694	24.831	IGLJ3
clioquinol-4663	1/100	0.0954324	0.0954324	0	0	10.5694	24.831	AZGP1
stachydrine-2743	1/100	0.0954324	0.0954324	0	0	10.5694	24.831	COL1A2
SC-58125-254	1/100	0.0954324	0.0954324	0	0	10.5694	24.831	AZGP1
estradiol-365	1/100	0.0954324	0.0954324	0	0	10.5694	24.831	COL1A2
brompheniramine-4013	1/100	0.0954324	0.0954324	0	0	10.5694	24.831	PIGR
furaltadone-2554	1/100	0.0954324	0.0954324	0	0	10.5694	24.831	COL1A2
hymecromone-5684	1/100	0.0954324	0.0954324	0	0	10.5694	24.831	IGLJ3
nitrofurantoin-2303	1/100	0.0954324	0.0954324	0	0	10.5694	24.831	S100A2
roxarsone-5051	1/100	0.0954324	0.0954324	0	0	10.5694	24.831	SPP1
doxorubicin-4610	1/100	0.0954324	0.0954324	0	0	10.5694	24.831	COL3A1
nalidixic acid-2297	1/100	0.0954324	0.0954324	0	0	10.5694	24.831	SPP1
methapyrilene-6644	1/100	0.0954324	0.0954324	0	0	10.5694	24.831	CD24
LY-294002-2687	1/100	0.0954324	0.0954324	0	0	10.5694	24.831	AZGP1
3-hydroxy-DL-kynurenine-5641	1/100	0.0954324	0.0954324	0	0	10.5694	24.831	SPP1
valproic acid-5211	1/100	0.0954324	0.0954324	0	0	10.5694	24.831	PIGR
paclitaxel-1959	1/100	0.0954324	0.0954324	0	0	10.5694	24.831	PIGR
piperacillin-3939	1/100	0.0954324	0.0954324	0	0	10.5694	24.831	COL3A1
apigenin-4401	1/100	0.0954324	0.0954324	0	0	10.5694	24.831	AZGP1
clemizole-4695	1/100	0.0954324	0.0954324	0	0	10.5694	24.831	AZGP1
salsolinol-4232	1/100	0.0954324	0.0954324	0	0	10.5694	24.831	COL3A1
kawain-2299	1/100	0.0954324	0.0954324	0	0	10.5694	24.831	COL1A2
bucladesine-3483	1/100	0.0954324	0.0954324	0	0	10.5694	24.831	PIGR
trichostatin A-6316	1/100	0.0954324	0.0954324	0	0	10.5694	24.831	MMP1
hecogenin-7175	1/100	0.0954324	0.0954324	0	0	10.5694	24.831	AZGP1
clotrimazole-905	1/100	0.0954324	0.0954324	0	0	10.5694	24.831	COL3A1
oleandomycin-5676	1/100	0.0954324	0.0954324	0	0	10.5694	24.831	IGLJ3
hemicholinium-6739	1/100	0.0954324	0.0954324	0	0	10.5694	24.831	COL1A2
acetylsalicylic acid-5564	1/100	0.0954324	0.0954324	0	0	10.5694	24.831	S100A2
atropine-1768	1/100	0.0954324	0.0954324	0	0	10.5694	24.831	PIGR
estropipate-4472	1/100	0.0954324	0.0954324	0	0	10.5694	24.831	COL3A1
estradiol-5205	1/100	0.0954324	0.0954324	0	0	10.5694	24.831	AZGP1
carbinoxamine-3466	1/100	0.0954324	0.0954324	0	0	10.5694	24.831	CD24
gliquidone-3126	1/100	0.0954324	0.0954324	0	0	10.5694	24.831	COL3A1
amitriptyline-6353	1/100	0.0954324	0.0954324	0	0	10.5694	24.831	CD24
ethoxyquin-2559	1/100	0.0954324	0.0954324	0	0	10.5694	24.831	COL1A2
trichostatin A-3077	1/100	0.0954324	0.0954324	0	0	10.5694	24.831	DSP
clorsulon-7025	1/100	0.0954324	0.0954324	0	0	10.5694	24.831	IGLJ3
monorden-544	1/100	0.0954324	0.0954324	0	0	10.5694	24.831	PIGR
ethotoin-4366	1/100	0.0954324	0.0954324	0	0	10.5694	24.831	IGLJ3
resveratrol-622	1/100	0.0954324	0.0954324	0	0	10.5694	24.831	AZGP1
zuclopenthixol-4261	1/100	0.0954324	0.0954324	0	0	10.5694	24.831	IGLJ3
timolol-5280	1/100	0.0954324	0.0954324	0	0	10.5694	24.831	COL1A2
sulfamethoxypyridazine-4733	1/100	0.0954324	0.0954324	0	0	10.5694	24.831	COL3A1
delsoline-6075	1/100	0.0954324	0.0954324	0	0	10.5694	24.831	COL3A1
terbutaline-6240	1/100	0.0954324	0.0954324	0	0	10.5694	24.831	AZGP1
piretanide-6144	1/100	0.0954324	0.0954324	0	0	10.5694	24.831	PIGR
fluphenazine-3194	1/100	0.0954324	0.0954324	0	0	10.5694	24.831	AZGP1
phensuximide-5522	1/100	0.0954324	0.0954324	0	0	10.5694	24.831	AZGP1
harmine-1758	1/100	0.0954324	0.0954324	0	0	10.5694	24.831	SPP1
metyrapone-6447	1/100	0.0954324	0.0954324	0	0	10.5694	24.831	PIGR
molindone-4199	1/100	0.0954324	0.0954324	0	0	10.5694	24.831	COL1A2
articaine-7272	1/100	0.0954324	0.0954324	0	0	10.5694	24.831	COL3A1
dicloxacillin-2445	1/100	0.0954324	0.0954324	0	0	10.5694	24.831	PIGR
tanespimycin-1218	1/100	0.0954324	0.0954324	0	0	10.5694	24.831	AGR2
Prestwick-920-5475	1/100	0.0954324	0.0954324	0	0	10.5694	24.831	AZGP1
cisapride-2443	1/100	0.0954324	0.0954324	0	0	10.5694	24.831	IGLJ3
triflusal-2867	1/100	0.0954324	0.0954324	0	0	10.5694	24.831	COL1A2
monobenzone-3054	1/100	0.0954324	0.0954324	0	0	10.5694	24.831	COL3A1
PNU-0251126-3689	1/100	0.0954324	0.0954324	0	0	10.5694	24.831	COL1A2
dicloxacillin-3307	1/100	0.0954324	0.0954324	0	0	10.5694	24.831	PIGR
trichostatin A-3332	1/100	0.0954324	0.0954324	0	0	10.5694	24.831	IGLJ3
salsolinol-2791	1/100	0.0954324	0.0954324	0	0	10.5694	24.831	COL1A2
mexiletine-4338	1/100	0.0954324	0.0954324	0	0	10.5694	24.831	SPP1
vigabatrin-6314	1/100	0.0954324	0.0954324	0	0	10.5694	24.831	COL3A1
LY-294002-461	1/100	0.0954324	0.0954324	0	0	10.5694	24.831	PIGR
nilutamide-6763	1/100	0.0954324	0.0954324	0	0	10.5694	24.831	PIGR
tiapride-3663	1/100	0.0954324	0.0954324	0	0	10.5694	24.831	IGLJ3
solasodine-3749	1/100	0.0954324	0.0954324	0	0	10.5694	24.831	COL1A2
GW-8510-7067	1/100	0.0954324	0.0954324	0	0	10.5694	24.831	CD24
droperidol-5690	1/100	0.0954324	0.0954324	0	0	10.5694	24.831	COL1A2
phthalylsulfathiazole-3033	1/100	0.0954324	0.0954324	0	0	10.5694	24.831	CD24
bergenin-7224	1/100	0.0954324	0.0954324	0	0	10.5694	24.831	COL3A1
prenylamine-5489	1/100	0.0954324	0.0954324	0	0	10.5694	24.831	S100A2
pentoxifylline-6021	1/100	0.0954324	0.0954324	0	0	10.5694	24.831	S100A2
medrysone-2544	1/100	0.0954324	0.0954324	0	0	10.5694	24.831	AZGP1
rescinnamine-4386	1/100	0.0954324	0.0954324	0	0	10.5694	24.831	IGLJ3
terfenadine-1381	1/100	0.0954324	0.0954324	0	0	10.5694	24.831	SPP1
isosorbide-3720	1/100	0.0954324	0.0954324	0	0	10.5694	24.831	COL3A1
indapamide-3778	1/100	0.0954324	0.0954324	0	0	10.5694	24.831	PIGR
aciclovir-1960	1/100	0.0954324	0.0954324	0	0	10.5694	24.831	CD24
Prestwick-1085-6250	1/100	0.0954324	0.0954324	0	0	10.5694	24.831	IGLJ3
isoxsuprine-1904	1/100	0.0954324	0.0954324	0	0	10.5694	24.831	PIGR
6-azathymine-2466	1/100	0.0954324	0.0954324	0	0	10.5694	24.831	COL1A2
sulfadimidine-3940	1/100	0.0954324	0.0954324	0	0	10.5694	24.831	IGLJ3
cyanocobalamin-4395	1/100	0.0954324	0.0954324	0	0	10.5694	24.831	IGLJ3
Prestwick-674-6034	1/100	0.0954324	0.0954324	0	0	10.5694	24.831	COL3A1
terconazole-4583	1/100	0.0954324	0.0954324	0	0	10.5694	24.831	CD24
vidarabine-7203	1/100	0.0954324	0.0954324	0	0	10.5694	24.831	AZGP1
ofloxacin-7372	1/100	0.0954324	0.0954324	0	0	10.5694	24.831	IGLJ3
dyclonine-7261	1/100	0.0954324	0.0954324	0	0	10.5694	24.831	COL3A1
Prestwick-674-2179	1/100	0.0954324	0.0954324	0	0	10.5694	24.831	COL1A2
clopamide-6301	1/100	0.0954324	0.0954324	0	0	10.5694	24.831	COL3A1
prazosin-5416	1/100	0.0954324	0.0954324	0	0	10.5694	24.831	PIGR
clozapine-2644	1/100	0.0954324	0.0954324	0	0	10.5694	24.831	IGLJ3
trichostatin A-3787	1/100	0.0954324	0.0954324	0	0	10.5694	24.831	MMP1
suloctidil-1297	1/100	0.0954324	0.0954324	0	0	10.5694	24.831	DSP
L-methionine sulfoximine-4070	1/100	0.0954324	0.0954324	0	0	10.5694	24.831	COL3A1
chlorpropamide-3210	1/100	0.0954324	0.0954324	0	0	10.5694	24.831	PIGR
chlorambucil-3788	1/100	0.0954324	0.0954324	0	0	10.5694	24.831	PIGR
ergocalciferol-6746	1/100	0.0954324	0.0954324	0	0	10.5694	24.831	IGLJ3
trichostatin A-5822	1/100	0.0954324	0.0954324	0	0	10.5694	24.831	MMP1
Prestwick-981-3125	1/100	0.0954324	0.0954324	0	0	10.5694	24.831	S100A2
rolipram-6730	1/100	0.0954324	0.0954324	0	0	10.5694	24.831	IGLJ3
trichostatin A-5940	1/100	0.0954324	0.0954324	0	0	10.5694	24.831	MMP1
desoxycortone-6758	1/100	0.0954324	0.0954324	0	0	10.5694	24.831	IGLJ3
pancuronium bromide-2909	1/100	0.0954324	0.0954324	0	0	10.5694	24.831	COL1A2
Chicago Sky Blue 6B-4971	1/100	0.0954324	0.0954324	0	0	10.5694	24.831	S100A2
SC-560-6870	1/100	0.0954324	0.0954324	0	0	10.5694	24.831	S100A2
sanguinarine-2927	1/100	0.0954324	0.0954324	0	0	10.5694	24.831	MMP1
carteolol-3276	1/100	0.0954324	0.0954324	0	0	10.5694	24.831	S100A2
alpha-estradiol-2670	1/100	0.0954324	0.0954324	0	0	10.5694	24.831	AZGP1
cefuroxime-6088	1/100	0.0954324	0.0954324	0	0	10.5694	24.831	IGLJ3
betaxolol-3208	1/100	0.0954324	0.0954324	0	0	10.5694	24.831	IGLJ3
furosemide-3197	1/100	0.0954324	0.0954324	0	0	10.5694	24.831	COL1A2
geldanamycin-611	1/100	0.0954324	0.0954324	0	0	10.5694	24.831	AGR2
benzthiazide-2989	1/100	0.0954324	0.0954324	0	0	10.5694	24.831	AZGP1
nadolol-3020	1/100	0.0954324	0.0954324	0	0	10.5694	24.831	PIGR
repaglinide-7216	1/100	0.0954324	0.0954324	0	0	10.5694	24.831	IGLJ3
chlorambucil-4523	1/100	0.0954324	0.0954324	0	0	10.5694	24.831	COL1A2
tanespimycin-2686	1/100	0.0954324	0.0954324	0	0	10.5694	24.831	IGLJ3
wortmannin-1023	1/100	0.0954324	0.0954324	0	0	10.5694	24.831	COL3A1
noscapine-5851	1/100	0.0954324	0.0954324	0	0	10.5694	24.831	PIGR
trichostatin A-2904	1/100	0.0954324	0.0954324	0	0	10.5694	24.831	DSP
felbinac-4639	1/100	0.0954324	0.0954324	0	0	10.5694	24.831	COL3A1
valproic acid-6199	1/100	0.0954324	0.0954324	0	0	10.5694	24.831	DSP
flumetasone-4734	1/100	0.0954324	0.0954324	0	0	10.5694	24.831	AZGP1
tenoxicam-2860	1/100	0.0954324	0.0954324	0	0	10.5694	24.831	PIGR
tanespimycin-986	1/100	0.0954324	0.0954324	0	0	10.5694	24.831	COL1A2
thalidomide-2258	1/100	0.0954324	0.0954324	0	0	10.5694	24.831	COL3A1
phenformin-3622	1/100	0.0954324	0.0954324	0	0	10.5694	24.831	AZGP1
thiamazole-4372	1/100	0.0954324	0.0954324	0	0	10.5694	24.831	IGLJ3
diflorasone-2798	1/100	0.0954324	0.0954324	0	0	10.5694	24.831	PIGR
bisacodyl-3297	1/100	0.0954324	0.0954324	0	0	10.5694	24.831	COL3A1
paroxetine-3904	1/100	0.0954324	0.0954324	0	0	10.5694	24.831	PIGR
pentolonium-3676	1/100	0.0954324	0.0954324	0	0	10.5694	24.831	IGLJ3
16-phenyltetranorprostaglandin E2-7509	1/100	0.0954324	0.0954324	0	0	10.5694	24.831	CD24
clomipramine-1566	1/100	0.0954324	0.0954324	0	0	10.5694	24.831	PIGR
geldanamycin-1228	1/100	0.0954324	0.0954324	0	0	10.5694	24.831	AGR2
trichostatin A-7503	1/100	0.0954324	0.0954324	0	0	10.5694	24.831	MMP1
(-)-isoprenaline-3571	1/100	0.0954324	0.0954324	0	0	10.5694	24.831	COL3A1
ciclosporin-4586	1/100	0.0954324	0.0954324	0	0	10.5694	24.831	AGR2
tanespimycin-6185	1/100	0.0954324	0.0954324	0	0	10.5694	24.831	COL1A2
metolazone-1932	1/100	0.0954324	0.0954324	0	0	10.5694	24.831	PIGR
midodrine-6804	1/100	0.0954324	0.0954324	0	0	10.5694	24.831	IGLJ3
geldanamycin-6946	1/100	0.0954324	0.0954324	0	0	10.5694	24.831	AGR2
thioridazine-5590	1/100	0.0954324	0.0954324	0	0	10.5694	24.831	S100A2
morantel-1840	1/100	0.0954324	0.0954324	0	0	10.5694	24.831	IGLJ3
dorzolamide-6142	1/100	0.0954324	0.0954324	0	0	10.5694	24.831	COL1A2
cefoperazone-1627	1/100	0.0954324	0.0954324	0	0	10.5694	24.831	SPP1
PNU-0251126-7390	1/100	0.0954324	0.0954324	0	0	10.5694	24.831	IGLJ3
nefopam-4752	1/100	0.0954324	0.0954324	0	0	10.5694	24.831	IGLJ3
torasemide-3517	1/100	0.0954324	0.0954324	0	0	10.5694	24.831	IGLV3-19
quinethazone-3875	1/100	0.0954324	0.0954324	0	0	10.5694	24.831	IGLJ3
zoxazolamine-5390	1/100	0.0954324	0.0954324	0	0	10.5694	24.831	IGLJ3
josamycin-2034	1/100	0.0954324	0.0954324	0	0	10.5694	24.831	CD24
trichostatin A-4237	1/100	0.0954324	0.0954324	0	0	10.5694	24.831	MMP1
nordihydroguaiaretic acid-1061	1/100	0.0954324	0.0954324	0	0	10.5694	24.831	CD24
(-)-MK-801-3081	1/100	0.0954324	0.0954324	0	0	10.5694	24.831	MMP1
fulvestrant-4462	1/100	0.0954324	0.0954324	0	0	10.5694	24.831	PIGR
clebopride-5412	1/100	0.0954324	0.0954324	0	0	10.5694	24.831	COL1A2
vancomycin-2498	1/100	0.0954324	0.0954324	0	0	10.5694	24.831	COL1A2
naftifine-7273	1/100	0.0954324	0.0954324	0	0	10.5694	24.831	COL3A1
trichostatin A-2993	1/100	0.0954324	0.0954324	0	0	10.5694	24.831	DSP
albendazole-3164	1/100	0.0954324	0.0954324	0	0	10.5694	24.831	AZGP1
pentetic acid-5264	1/100	0.0954324	0.0954324	0	0	10.5694	24.831	PIGR
trichostatin A-3993	1/100	0.0954324	0.0954324	0	0	10.5694	24.831	MMP1
fenspiride-2106	1/100	0.0954324	0.0954324	0	0	10.5694	24.831	COL3A1
cefotiam-3319	1/100	0.0954324	0.0954324	0	0	10.5694	24.831	IGLJ3
cetirizine-2468	1/100	0.0954324	0.0954324	0	0	10.5694	24.831	MMP1
trichostatin A-4072	1/100	0.0954324	0.0954324	0	0	10.5694	24.831	MMP1
fenbufen-4743	1/100	0.0954324	0.0954324	0	0	10.5694	24.831	IGLJ3
meprylcaine-3544	1/100	0.0954324	0.0954324	0	0	10.5694	24.831	COL1A2
0225151-0000-6384	1/100	0.0954324	0.0954324	0	0	10.5694	24.831	COL3A1
trichostatin A-7387	1/100	0.0954324	0.0954324	0	0	10.5694	24.831	MMP1
furaltadone-3932	1/100	0.0954324	0.0954324	0	0	10.5694	24.831	IGLJ3
thioperamide-3055	1/100	0.0954324	0.0954324	0	0	10.5694	24.831	COL1A2
betazole-6344	1/100	0.0954324	0.0954324	0	0	10.5694	24.831	IGLJ3
cefapirin-6790	1/100	0.0954324	0.0954324	0	0	10.5694	24.831	IGLJ3
merbromin-2577	1/100	0.0954324	0.0954324	0	0	10.5694	24.831	SPP1
riluzole-2295	1/100	0.0954324	0.0954324	0	0	10.5694	24.831	COL3A1
carteolol-4096	1/100	0.0954324	0.0954324	0	0	10.5694	24.831	COL1A2
alsterpaullone-7051	1/100	0.0954324	0.0954324	0	0	10.5694	24.831	S100A2
mimosine-5302	1/100	0.0954324	0.0954324	0	0	10.5694	24.831	CD24
ofloxacin-3673	1/100	0.0954324	0.0954324	0	0	10.5694	24.831	AZGP1
colistin-4212	1/100	0.0954324	0.0954324	0	0	10.5694	24.831	COL3A1
fipexide-3176	1/100	0.0954324	0.0954324	0	0	10.5694	24.831	IGKV4-1
oxolinic acid-5094	1/100	0.0954324	0.0954324	0	0	10.5694	24.831	IGLJ3
LY-294002-1236	1/100	0.0954324	0.0954324	0	0	10.5694	24.831	MMP1
tanespimycin-5585	1/100	0.0954324	0.0954324	0	0	10.5694	24.831	PIGR
anabasine-2512	1/100	0.0954324	0.0954324	0	0	10.5694	24.831	PIGR
hydralazine-3621	1/100	0.0954324	0.0954324	0	0	10.5694	24.831	COL3A1
methotrexate-3214	1/100	0.0954324	0.0954324	0	0	10.5694	24.831	S100A2
mecamylamine-7263	1/100	0.0954324	0.0954324	0	0	10.5694	24.831	COL3A1
neostigmine bromide-6735	1/100	0.0954324	0.0954324	0	0	10.5694	24.831	IGLJ3
metrifonate-7287	1/100	0.0954324	0.0954324	0	0	10.5694	24.831	COL3A1
propoxycaine-6161	1/100	0.0954324	0.0954324	0	0	10.5694	24.831	PIGR
hydrocortisone-3284	1/100	0.0954324	0.0954324	0	0	10.5694	24.831	COL3A1
cyproheptadine-1521	1/100	0.0954324	0.0954324	0	0	10.5694	24.831	AZGP1
butyl hydroxybenzoate-5608	1/100	0.0954324	0.0954324	0	0	10.5694	24.831	PIGR
methylprednisolone-3183	1/100	0.0954324	0.0954324	0	0	10.5694	24.831	AZGP1
imipenem-7294	1/100	0.0954324	0.0954324	0	0	10.5694	24.831	COL3A1
domperidone-4640	1/100	0.0954324	0.0954324	0	0	10.5694	24.831	COL3A1
(+)-isoprenaline-3384	1/100	0.0954324	0.0954324	0	0	10.5694	24.831	COL3A1
skimmianine-6242	1/100	0.0954324	0.0954324	0	0	10.5694	24.831	S100A2
chlorpromazine-1822	1/100	0.0954324	0.0954324	0	0	10.5694	24.831	AGR2
Prestwick-1100-3798	1/100	0.0954324	0.0954324	0	0	10.5694	24.831	COL3A1
4-hydroxyphenazone-4175	1/100	0.0954324	0.0954324	0	0	10.5694	24.831	PIGR
latamoxef-4648	1/100	0.0954324	0.0954324	0	0	10.5694	24.831	IGLV3-19
trichostatin A-5065	1/100	0.0954324	0.0954324	0	0	10.5694	24.831	MMP1
doxepin-2384	1/100	0.0954324	0.0954324	0	0	10.5694	24.831	CD24
pargyline-2102	1/100	0.0954324	0.0954324	0	0	10.5694	24.831	CD24
propantheline bromide-3352	1/100	0.0954324	0.0954324	0	0	10.5694	24.831	PIGR
metoclopramide-2315	1/100	0.0954324	0.0954324	0	0	10.5694	24.831	IGLJ3
cinnarizine-3175	1/100	0.0954324	0.0954324	0	0	10.5694	24.831	PIGR
trimethylcolchicinic acid-2802	1/100	0.0954324	0.0954324	0	0	10.5694	24.831	PIGR
mefloquine-1364	1/100	0.0954324	0.0954324	0	0	10.5694	24.831	SPP1
leflunomide-7238	1/100	0.0954324	0.0954324	0	0	10.5694	24.831	IGLJ3
trioxysalen-2516	1/100	0.0954324	0.0954324	0	0	10.5694	24.831	AZGP1
ifenprodil-2372	1/100	0.0954324	0.0954324	0	0	10.5694	24.831	COL3A1
fluphenazine-490	1/100	0.0954324	0.0954324	0	0	10.5694	24.831	COL1A2
estropipate-2506	1/100	0.0954324	0.0954324	0	0	10.5694	24.831	CD24
Prestwick-674-3614	1/100	0.0954324	0.0954324	0	0	10.5694	24.831	IGLJ3
flumetasone-3410	1/100	0.0954324	0.0954324	0	0	10.5694	24.831	IGLJ3
metronidazole-4023	1/100	0.0954324	0.0954324	0	0	10.5694	24.831	COL1A2
dicycloverine-1902	1/100	0.0954324	0.0954324	0	0	10.5694	24.831	CD24
prednicarbate-5544	1/100	0.0954324	0.0954324	0	0	10.5694	24.831	PIGR
aminophylline-6295	1/100	0.0954324	0.0954324	0	0	10.5694	24.831	COL1A2
diltiazem-1532	1/100	0.0954324	0.0954324	0	0	10.5694	24.831	COL3A1
alfuzosin-1586	1/100	0.0954324	0.0954324	0	0	10.5694	24.831	SPP1
trichostatin A-6171	1/100	0.0954324	0.0954324	0	0	10.5694	24.831	DSP
nifedipine-6006	1/100	0.0954324	0.0954324	0	0	10.5694	24.831	IGLV3-19
0179445-0000-3630	1/100	0.0954324	0.0954324	0	0	10.5694	24.831	PIGR
clomipramine-3182	1/100	0.0954324	0.0954324	0	0	10.5694	24.831	COL3A1
trifluoperazine-5221	1/100	0.0954324	0.0954324	0	0	10.5694	24.831	AZGP1
LY-294002-6953	1/100	0.0954324	0.0954324	0	0	10.5694	24.831	IGLJ3
trichostatin A-2105	1/100	0.0954324	0.0954324	0	0	10.5694	24.831	MMP1
STOCK1N-35215-6422	1/100	0.0954324	0.0954324	0	0	10.5694	24.831	COL3A1
sirolimus-1162	1/100	0.0954324	0.0954324	0	0	10.5694	24.831	CD24
cycloserine-3562	1/100	0.0954324	0.0954324	0	0	10.5694	24.831	COL1A2
(+)-isoprenaline-3046	1/100	0.0954324	0.0954324	0	0	10.5694	24.831	IGLV3-19
promazine-3752	1/100	0.0954324	0.0954324	0	0	10.5694	24.831	PIGR
Prestwick-860-4618	1/100	0.0954324	0.0954324	0	0	10.5694	24.831	COL3A1
bemegride-3051	1/100	0.0954324	0.0954324	0	0	10.5694	24.831	COL1A2
pentoxyverine-2623	1/100	0.0954324	0.0954324	0	0	10.5694	24.831	COL1A2
famprofazone-4309	1/100	0.0954324	0.0954324	0	0	10.5694	24.831	COL1A2
lynestrenol-1953	1/100	0.0954324	0.0954324	0	0	10.5694	24.831	CD24
trichostatin A-7047	1/100	0.0954324	0.0954324	0	0	10.5694	24.831	MMP1
disopyramide-7276	1/100	0.0954324	0.0954324	0	0	10.5694	24.831	COL3A1
metoprolol-6846	1/100	0.0954324	0.0954324	0	0	10.5694	24.831	PIGR
ethionamide-4418	1/100	0.0954324	0.0954324	0	0	10.5694	24.831	IGLJ3
3-nitropropionic acid-6402	1/100	0.0954324	0.0954324	0	0	10.5694	24.831	AZGP1
tolazoline-4844	1/100	0.0954324	0.0954324	0	0	10.5694	24.831	IGLV3-19
quercetin-2499	1/100	0.0954324	0.0954324	0	0	10.5694	24.831	SPP1
trichostatin A-3746	1/100	0.0954324	0.0954324	0	0	10.5694	24.831	MMP1
trichostatin A-5908	1/100	0.0954324	0.0954324	0	0	10.5694	24.831	MMP1
fulvestrant-5931	1/100	0.0954324	0.0954324	0	0	10.5694	24.831	COL1A2
flumetasone-3712	1/100	0.0954324	0.0954324	0	0	10.5694	24.831	IGLJ3
1,4-chrysenequinone-7139	1/100	0.0954324	0.0954324	0	0	10.5694	24.831	MMP1
monastrol-627	1/100	0.0954324	0.0954324	0	0	10.5694	24.831	AZGP1
ergocalciferol-2442	1/100	0.0954324	0.0954324	0	0	10.5694	24.831	IGLJ3
sulfadimidine-2560	1/100	0.0954324	0.0954324	0	0	10.5694	24.831	AZGP1
furaltadone-4313	1/100	0.0954324	0.0954324	0	0	10.5694	24.831	SPP1
N-acetyl-L-leucine-6462	1/100	0.0954324	0.0954324	0	0	10.5694	24.831	COL3A1
trichostatin A-6340	1/100	0.0954324	0.0954324	0	0	10.5694	24.831	MMP1
canadine-4138	1/100	0.0954324	0.0954324	0	0	10.5694	24.831	IGLJ3
trifluoperazine-1165	1/100	0.0954324	0.0954324	0	0	10.5694	24.831	SPP1
(-)-atenolol-6444	1/100	0.0954324	0.0954324	0	0	10.5694	24.831	PIGR
phenacetin-3992	1/100	0.0954324	0.0954324	0	0	10.5694	24.831	AZGP1
nalidixic acid-3668	1/100	0.0954324	0.0954324	0	0	10.5694	24.831	IGLJ3
Prestwick-981-7464	1/100	0.0954324	0.0954324	0	0	10.5694	24.831	COL3A1
saquinavir-5770	1/100	0.0954324	0.0954324	0	0	10.5694	24.831	COL3A1
prednicarbate-3542	1/100	0.0954324	0.0954324	0	0	10.5694	24.831	IGLJ3
flumetasone-4272	1/100	0.0954324	0.0954324	0	0	10.5694	24.831	IGLJ3
alpha-estradiol-5207	1/100	0.0954324	0.0954324	0	0	10.5694	24.831	COL3A1
15-delta prostaglandin J2-5228	1/100	0.0954324	0.0954324	0	0	10.5694	24.831	IGLJ3
labetalol-1550	1/100	0.0954324	0.0954324	0	0	10.5694	24.831	SPP1
trifluoperazine-2684	1/100	0.0954324	0.0954324	0	0	10.5694	24.831	SPP1
tropine-6147	1/100	0.0954324	0.0954324	0	0	10.5694	24.831	PIGR
chloramphenicol-1795	1/100	0.0954324	0.0954324	0	0	10.5694	24.831	CD24
sodium phenylbutyrate-341	1/100	0.0954324	0.0954324	0	0	10.5694	24.831	AZGP1
astemizole-1365	1/100	0.0954324	0.0954324	0	0	10.5694	24.831	SPP1
trichostatin A-2949	1/100	0.0954324	0.0954324	0	0	10.5694	24.831	DSP
zalcitabine-2932	1/100	0.0954324	0.0954324	0	0	10.5694	24.831	AZGP1
Prestwick-857-3355	1/100	0.0954324	0.0954324	0	0	10.5694	24.831	COL3A1
carbimazole-2437	1/100	0.0954324	0.0954324	0	0	10.5694	24.831	IGLJ3
acetylsalicylsalicylic acid-6778	1/100	0.0954324	0.0954324	0	0	10.5694	24.831	S100A2
isopropamide iodide-2720	1/100	0.0954324	0.0954324	0	0	10.5694	24.831	IGLJ3
succinylsulfathiazole-4847	1/100	0.0954324	0.0954324	0	0	10.5694	24.831	AZGP1
nefopam-3627	1/100	0.0954324	0.0954324	0	0	10.5694	24.831	COL3A1
abamectin-2519	1/100	0.0954324	0.0954324	0	0	10.5694	24.831	IGLV3-19
santonin-3795	1/100	0.0954324	0.0954324	0	0	10.5694	24.831	PIGR
dexverapamil-164	1/100	0.0954324	0.0954324	0	0	10.5694	24.831	AZGP1
etiocholanolone-3639	1/100	0.0954324	0.0954324	0	0	10.5694	24.831	IGLV3-19
homosalate-3879	1/100	0.0954324	0.0954324	0	0	10.5694	24.831	IGLJ3
griseofulvin-2293	1/100	0.0954324	0.0954324	0	0	10.5694	24.831	IGLJ3
ciclacillin-4358	1/100	0.0954324	0.0954324	0	0	10.5694	24.831	COL3A1
dobutamine-6286	1/100	0.0954324	0.0954324	0	0	10.5694	24.831	CD24
tetroquinone-3338	1/100	0.0954324	0.0954324	0	0	10.5694	24.831	IGKV4-1
dimenhydrinate-2400	1/100	0.0954324	0.0954324	0	0	10.5694	24.831	CD24
gliclazide-2870	1/100	0.0954324	0.0954324	0	0	10.5694	24.831	COL3A1
(+/-)-catechin-4255	1/100	0.0954324	0.0954324	0	0	10.5694	24.831	IGLJ3
trichostatin A-6546	1/100	0.0954324	0.0954324	0	0	10.5694	24.831	MMP1
cefixime-4390	1/100	0.0954324	0.0954324	0	0	10.5694	24.831	IGLJ3
bromocriptine-4604	1/100	0.0954324	0.0954324	0	0	10.5694	24.831	COL3A1
trichostatin A-7105	1/100	0.0954324	0.0954324	0	0	10.5694	24.831	MMP1
iproniazid-5458	1/100	0.0954324	0.0954324	0	0	10.5694	24.831	PIGR
clozapine-5226	1/100	0.0954324	0.0954324	0	0	10.5694	24.831	IGLJ3
homatropine-5058	1/100	0.0954324	0.0954324	0	0	10.5694	24.831	SPP1
gliquidone-7301	1/100	0.0954324	0.0954324	0	0	10.5694	24.831	IGLJ3
metitepine-3231	1/100	0.0954324	0.0954324	0	0	10.5694	24.831	COL3A1
procarbazine-5452	1/100	0.0954324	0.0954324	0	0	10.5694	24.831	COL1A2
piromidic acid-2996	1/100	0.0954324	0.0954324	0	0	10.5694	24.831	CD24
econazole-2396	1/100	0.0954324	0.0954324	0	0	10.5694	24.831	IGLJ3
nifurtimox-4953	1/100	0.0954324	0.0954324	0	0	10.5694	24.831	S100A2
perhexiline-2410	1/100	0.0954324	0.0954324	0	0	10.5694	24.831	SPP1
myricetin-1334	1/100	0.0954324	0.0954324	0	0	10.5694	24.831	SPP1
cyclic adenosine monophosphate-5533	1/100	0.0954324	0.0954324	0	0	10.5694	24.831	IGLJ3
tanespimycin-6166	1/100	0.0954324	0.0954324	0	0	10.5694	24.831	PIGR
ornidazole-5483	1/100	0.0954324	0.0954324	0	0	10.5694	24.831	S100A2
hesperetin-1947	1/100	0.0954324	0.0954324	0	0	10.5694	24.831	CD24
tanespimycin-4450	1/100	0.0954324	0.0954324	0	0	10.5694	24.831	COL3A1
ceforanide-6751	1/100	0.0954324	0.0954324	0	0	10.5694	24.831	IGLJ3
benperidol-4781	1/100	0.0954324	0.0954324	0	0	10.5694	24.831	COL1A2
Cmap co-downregulated genes
Term	Overlap	P-value	Adjusted P-value	Old P-value	Old Adjusted P-value	Odds Ratio	Combined Score	Genes
astemizole-6807	4/100	6.86515e-06	0.0107234	0	0	39.4425	468.933	PRF1;S100A4;CRIP1;S100A9
paclitaxel-6720	3/100	0.000257515	0.0201119	0	0	27.9447	230.947	ID1;S100A4;NRGN
(+)-chelidonine-1786	3/100	0.000257515	0.0201119	0	0	27.9447	230.947	CCL2;CRIP1;S100A9
edrophonium chloride-5001	3/100	0.000257515	0.0201119	0	0	27.9447	230.947	PRF1;S100A9;NRGN
vigabatrin-5415	3/100	0.000257515	0.0201119	0	0	27.9447	230.947	PRF1;CRIP1;S100A9
gabexate-4804	3/100	0.000257515	0.0201119	0	0	27.9447	230.947	PRF1;CRIP1;NRGN
clenbuterol-5266	3/100	0.000257515	0.0201119	0	0	27.9447	230.947	S100A4;CRIP1;S100A9
pindolol-6834	3/100	0.000257515	0.0201119	0	0	27.9447	230.947	S100A4;S100A9;NRGN
nocodazole-1393	3/100	0.000257515	0.0201119	0	0	27.9447	230.947	CCL2;S100A9;S100A8
naringin-5666	3/100	0.000257515	0.0201119	0	0	27.9447	230.947	S100A4;CRIP1;S100A9
vanoxerine-5702	3/100	0.000257515	0.0201119	0	0	27.9447	230.947	S100A4;CRIP1;S100A9
florfenicol-6701	3/100	0.000257515	0.0201119	0	0	27.9447	230.947	IL6;BEX1;PRF1
prenylamine-1737	3/100	0.000257515	0.0201119	0	0	27.9447	230.947	S100A9;S100A8;NRGN
ambroxol-6719	3/100	0.000257515	0.0201119	0	0	27.9447	230.947	ID1;S100A4;NRGN
iohexol-5704	3/100	0.000257515	0.0201119	0	0	27.9447	230.947	CRIP1;S100A9;NRGN
nicotinic acid-6702	3/100	0.000257515	0.0201119	0	0	27.9447	230.947	IL6;BEX1;PRF1
clomipramine-6825	3/100	0.000257515	0.0201119	0	0	27.9447	230.947	PRF1;S100A9;NRGN
Prestwick-1100-3880	3/100	0.000257515	0.0201119	0	0	27.9447	230.947	S100A4;CRIP1;NRGN
cyproterone-4470	3/100	0.000257515	0.0201119	0	0	27.9447	230.947	IL6;BEX1;PRF1
trifluoperazine-2684	3/100	0.000257515	0.0201119	0	0	27.9447	230.947	SCGB1A1;S100A9;S100A8
estradiol-2701	2/100	0.00688907	0.0549017	0	0	17.6371	87.7942	PRF1;G0S2
estriol-3563	2/100	0.00688907	0.0549017	0	0	17.6371	87.7942	ID1;NRGN
moracizine-2959	2/100	0.00688907	0.0549017	0	0	17.6371	87.7942	CCL2;CRIP1
troglitazone-2692	2/100	0.00688907	0.0549017	0	0	17.6371	87.7942	SCGB1A1;CCL2
trichostatin A-6709	2/100	0.00688907	0.0549017	0	0	17.6371	87.7942	ID1;S100A4
gibberellic acid-4818	2/100	0.00688907	0.0549017	0	0	17.6371	87.7942	CRIP1;S100A9
testosterone-5636	2/100	0.00688907	0.0549017	0	0	17.6371	87.7942	S100A4;CRIP1
flunisolide-3828	2/100	0.00688907	0.0549017	0	0	17.6371	87.7942	S100A4;S100A9
theobromine-3334	2/100	0.00688907	0.0549017	0	0	17.6371	87.7942	ID1;S100A9
proadifen-3446	2/100	0.00688907	0.0549017	0	0	17.6371	87.7942	S100A4;NRGN
docosahexaenoic acid ethyl ester-881	2/100	0.00688907	0.0549017	0	0	17.6371	87.7942	CRIP1;NRGN
sulfanilamide-6810	2/100	0.00688907	0.0549017	0	0	17.6371	87.7942	PRF1;S100A9
benserazide-6722	2/100	0.00688907	0.0549017	0	0	17.6371	87.7942	FABP4;ID1
azathioprine-5627	2/100	0.00688907	0.0549017	0	0	17.6371	87.7942	CRIP1;S100A9
amantadine-4222	2/100	0.00688907	0.0549017	0	0	17.6371	87.7942	BEX1;PRF1
alclometasone-6094	2/100	0.00688907	0.0549017	0	0	17.6371	87.7942	CRIP1;NRGN
bicuculline-4397	2/100	0.00688907	0.0549017	0	0	17.6371	87.7942	S100A4;CRIP1
aminohippuric acid-5394	2/100	0.00688907	0.0549017	0	0	17.6371	87.7942	S100A9;NRGN
clopamide-5402	2/100	0.00688907	0.0549017	0	0	17.6371	87.7942	S100A9;NRGN
troglitazone-5592	2/100	0.00688907	0.0549017	0	0	17.6371	87.7942	CRIP1;NRGN
triprolidine-7408	2/100	0.00688907	0.0549017	0	0	17.6371	87.7942	S100A4;NRGN
glimepiride-4973	2/100	0.00688907	0.0549017	0	0	17.6371	87.7942	CRIP1;S100A9
prednisone-4400	2/100	0.00688907	0.0549017	0	0	17.6371	87.7942	CRIP1;S100A9
dihydroergotamine-6840	2/100	0.00688907	0.0549017	0	0	17.6371	87.7942	PRF1;CRIP1
albendazole-1547	2/100	0.00688907	0.0549017	0	0	17.6371	87.7942	CCL2;S100A9
piperine-4247	2/100	0.00688907	0.0549017	0	0	17.6371	87.7942	PRF1;NRGN
idazoxan-6747	2/100	0.00688907	0.0549017	0	0	17.6371	87.7942	IL6;CRIP1
methoxamine-4972	2/100	0.00688907	0.0549017	0	0	17.6371	87.7942	S100A4;CRIP1
luteolin-5004	2/100	0.00688907	0.0549017	0	0	17.6371	87.7942	ID1;S100A4
phenelzine-2319	2/100	0.00688907	0.0549017	0	0	17.6371	87.7942	PRF1;NRGN
acetohexamide-1829	2/100	0.00688907	0.0549017	0	0	17.6371	87.7942	S100A4;PPBP
estradiol-1021	2/100	0.00688907	0.0549017	0	0	17.6371	87.7942	ID1;NRGN
demeclocycline-4267	2/100	0.00688907	0.0549017	0	0	17.6371	87.7942	BEX1;S100A4
1,5-isoquinolinediol-543	2/100	0.00688907	0.0549017	0	0	17.6371	87.7942	CCL2;EMP2
carcinine-4809	2/100	0.00688907	0.0549017	0	0	17.6371	87.7942	ID1;NRGN
cefoxitin-6796	2/100	0.00688907	0.0549017	0	0	17.6371	87.7942	PRF1;S100A9
dexibuprofen-6712	2/100	0.00688907	0.0549017	0	0	17.6371	87.7942	ID1;S100A4
nordihydroguaiaretic acid-2683	2/100	0.00688907	0.0549017	0	0	17.6371	87.7942	PRF1;NRGN
propofol-6707	2/100	0.00688907	0.0549017	0	0	17.6371	87.7942	BEX1;PRF1
meptazinol-4188	2/100	0.00688907	0.0549017	0	0	17.6371	87.7942	ID1;S100A4
sulfamonomethoxine-5843	2/100	0.00688907	0.0549017	0	0	17.6371	87.7942	IL6;BEX1
sulfathiazole-4769	2/100	0.00688907	0.0549017	0	0	17.6371	87.7942	ID1;CRIP1
tiratricol-2259	2/100	0.00688907	0.0549017	0	0	17.6371	87.7942	CRIP1;S100A9
urapidil-6696	2/100	0.00688907	0.0549017	0	0	17.6371	87.7942	BEX1;PRF1
epitiostanol-4788	2/100	0.00688907	0.0549017	0	0	17.6371	87.7942	ID1;CRIP1
medrysone-4727	2/100	0.00688907	0.0549017	0	0	17.6371	87.7942	PRF1;S100A9
medrysone-4266	2/100	0.00688907	0.0549017	0	0	17.6371	87.7942	BEX1;CRIP1
spiradoline-3901	2/100	0.00688907	0.0549017	0	0	17.6371	87.7942	S100A4;CRIP1
isopropamide iodide-3461	2/100	0.00688907	0.0549017	0	0	17.6371	87.7942	S100A4;NRGN
norcyclobenzaprine-2469	2/100	0.00688907	0.0549017	0	0	17.6371	87.7942	CCL2;G0S2
lansoprazole-6009	2/100	0.00688907	0.0549017	0	0	17.6371	87.7942	CRIP1;NRGN
dacarbazine-4480	2/100	0.00688907	0.0549017	0	0	17.6371	87.7942	BEX1;PRF1
spironolactone-1380	2/100	0.00688907	0.0549017	0	0	17.6371	87.7942	CCL2;NRGN
acepromazine-1777	2/100	0.00688907	0.0549017	0	0	17.6371	87.7942	CCL2;CRIP1
khellin-6641	2/100	0.00688907	0.0549017	0	0	17.6371	87.7942	PRF1;MNDA
chlormezanone-5697	2/100	0.00688907	0.0549017	0	0	17.6371	87.7942	CRIP1;S100A9
haloperidol-5563	2/100	0.00688907	0.0549017	0	0	17.6371	87.7942	S100A4;NRGN
debrisoquine-6688	2/100	0.00688907	0.0549017	0	0	17.6371	87.7942	BEX1;PRF1
flunarizine-7252	2/100	0.00688907	0.0549017	0	0	17.6371	87.7942	CRIP1;NRGN
tanespimycin-4442	2/100	0.00688907	0.0549017	0	0	17.6371	87.7942	BEX1;ID1
etodolac-2254	2/100	0.00688907	0.0549017	0	0	17.6371	87.7942	CRIP1;S100A9
piracetam-1710	2/100	0.00688907	0.0549017	0	0	17.6371	87.7942	CRIP1;NRGN
apigenin-4401	2/100	0.00688907	0.0549017	0	0	17.6371	87.7942	ID1;S100A9
delsoline-6075	2/100	0.00688907	0.0549017	0	0	17.6371	87.7942	PRF1;CRIP1
arecoline-5423	2/100	0.00688907	0.0549017	0	0	17.6371	87.7942	CRIP1;S100A9
trimipramine-3342	2/100	0.00688907	0.0549017	0	0	17.6371	87.7942	S100A4;NRGN
terfenadine-1381	2/100	0.00688907	0.0549017	0	0	17.6371	87.7942	S100A9;S100A8
mepenzolate bromide-3829	2/100	0.00688907	0.0549017	0	0	17.6371	87.7942	S100A4;NRGN
tolazoline-4262	2/100	0.00688907	0.0549017	0	0	17.6371	87.7942	BEX1;CCL2
prazosin-5416	2/100	0.00688907	0.0549017	0	0	17.6371	87.7942	CRIP1;S100A9
butamben-6266	2/100	0.00688907	0.0549017	0	0	17.6371	87.7942	S100A4;NRGN
valproic acid-410	2/100	0.00688907	0.0549017	0	0	17.6371	87.7942	CCL2;MNDA
guanadrel-4720	2/100	0.00688907	0.0549017	0	0	17.6371	87.7942	PRF1;S100A4
piperlongumine-1764	2/100	0.00688907	0.0549017	0	0	17.6371	87.7942	CCL2;MNDA
alpha-ergocryptine-3817	2/100	0.00688907	0.0549017	0	0	17.6371	87.7942	IL6;PRF1
clidinium bromide-6837	2/100	0.00688907	0.0549017	0	0	17.6371	87.7942	PRF1;CRIP1
fosfosal-4239	2/100	0.00688907	0.0549017	0	0	17.6371	87.7942	PRF1;CCL2
methyldopa-4677	2/100	0.00688907	0.0549017	0	0	17.6371	87.7942	IL6;PRF1
eucatropine-3935	2/100	0.00688907	0.0549017	0	0	17.6371	87.7942	CRIP1;S100A9
tanespimycin-6944	2/100	0.00688907	0.0549017	0	0	17.6371	87.7942	ID1;NRGN
alvespimycin-2673	2/100	0.00688907	0.0549017	0	0	17.6371	87.7942	SCGB1A1;PRF1
spiramycin-3844	2/100	0.00688907	0.0549017	0	0	17.6371	87.7942	S100A9;NRGN
clomipramine-1566	2/100	0.00688907	0.0549017	0	0	17.6371	87.7942	BEX1;CCL2
geldanamycin-6946	2/100	0.00688907	0.0549017	0	0	17.6371	87.7942	ID1;NRGN
alprostadil-6555	2/100	0.00688907	0.0549017	0	0	17.6371	87.7942	BEX1;PRF1
atropine oxide-6812	2/100	0.00688907	0.0549017	0	0	17.6371	87.7942	PRF1;S100A9
deferoxamine-3936	2/100	0.00688907	0.0549017	0	0	17.6371	87.7942	PRF1;CRIP1
tanespimycin-1166	2/100	0.00688907	0.0549017	0	0	17.6371	87.7942	CRIP1;NRGN
cloperastine-4271	2/100	0.00688907	0.0549017	0	0	17.6371	87.7942	BEX1;S100A4
chlorpromazine-5577	2/100	0.00688907	0.0549017	0	0	17.6371	87.7942	PRF1;NRGN
PF-00875133-00-5923	2/100	0.00688907	0.0549017	0	0	17.6371	87.7942	SCGB1A1;PRF1
mefexamide-2284	2/100	0.00688907	0.0549017	0	0	17.6371	87.7942	PRF1;S100A9
F0447-0125-6401	2/100	0.00688907	0.0549017	0	0	17.6371	87.7942	FCN1;FCGR3B
tanespimycin-450	2/100	0.00688907	0.0549017	0	0	17.6371	87.7942	BEX1;ID1
ethoxyquin-4321	2/100	0.00688907	0.0549017	0	0	17.6371	87.7942	BEX1;PRF1
diphemanil metilsulfate-4416	2/100	0.00688907	0.0549017	0	0	17.6371	87.7942	CRIP1;S100A9
colchicine-1598	2/100	0.00688907	0.0549017	0	0	17.6371	87.7942	CCL2;S100A9
trichostatin A-1785	2/100	0.00688907	0.0549017	0	0	17.6371	87.7942	CCL2;CRIP1
tocainide-4838	2/100	0.00688907	0.0549017	0	0	17.6371	87.7942	PRF1;S100A9
nifedipine-6006	2/100	0.00688907	0.0549017	0	0	17.6371	87.7942	S100A4;CRIP1
clozapine-5630	2/100	0.00688907	0.0549017	0	0	17.6371	87.7942	CRIP1;S100A9
flupentixol-1288	2/100	0.00688907	0.0549017	0	0	17.6371	87.7942	CCL2;NRGN
LY-294002-1180	2/100	0.00688907	0.0549017	0	0	17.6371	87.7942	CRIP1;NRGN
15(S)-15-methylprostaglandin E2-7489	2/100	0.00688907	0.0549017	0	0	17.6371	87.7942	CRIP1;S100A9
0317956-0000-4331	2/100	0.00688907	0.0549017	0	0	17.6371	87.7942	PRF1;NRGN
fluorometholone-6071	2/100	0.00688907	0.0549017	0	0	17.6371	87.7942	S100A4;CRIP1
Prestwick-689-5816	2/100	0.00688907	0.0549017	0	0	17.6371	87.7942	BEX1;NRGN
MG-262-7063	2/100	0.00688907	0.0549017	0	0	17.6371	87.7942	EMP2;NRGN
Prestwick-981-6504	2/100	0.00688907	0.0549017	0	0	17.6371	87.7942	PRF1;NRGN
quinethazone-4351	2/100	0.00688907	0.0549017	0	0	17.6371	87.7942	PRF1;CRIP1
halofantrine-3130	2/100	0.00688907	0.0549017	0	0	17.6371	87.7942	CLEC3B;PRF1
dipyridamole-5617	2/100	0.00688907	0.0549017	0	0	17.6371	87.7942	CRIP1;S100A9
timolol-5645	2/100	0.00688907	0.0549017	0	0	17.6371	87.7942	PRF1;CRIP1
acenocoumarol-2240	2/100	0.00688907	0.0549017	0	0	17.6371	87.7942	CRIP1;S100A9
oxprenolol-5871	2/100	0.00688907	0.0549017	0	0	17.6371	87.7942	BEX1;S100A4
perhexiline-2410	2/100	0.00688907	0.0549017	0	0	17.6371	87.7942	S100A9;S100A8
gossypol-3637	2/100	0.00688907	0.0549017	0	0	17.6371	87.7942	FCN1;CRIP1
carbinoxamine-2725	2/100	0.00688907	0.0549017	0	0	17.6371	87.7942	PRF1;CRIP1
mifepristone-3185	2/100	0.00688907	0.0549017	0	0	17.6371	87.7942	S100A4;NRGN
tanespimycin-4430	2/100	0.00688907	0.0549017	0	0	17.6371	87.7942	BEX1;ID1
thioperamide-5270	2/100	0.00688907	0.0549017	0	0	17.6371	87.7942	S100A4;S100A9
(+)-isoprenaline-5009	2/100	0.00688907	0.0549017	0	0	17.6371	87.7942	PRF1;CRIP1
lithocholic acid-2571	2/100	0.00688907	0.0549017	0	0	17.6371	87.7942	CCL2;NRGN
tanespimycin-5953	2/100	0.00688907	0.0549017	0	0	17.6371	87.7942	ID1;S100A9
alpha-estradiol-6970	2/100	0.00688907	0.0549017	0	0	17.6371	87.7942	S100A4;NRGN
loracarbef-5073	2/100	0.00688907	0.0549017	0	0	17.6371	87.7942	IL6;BEX1
fisetin-579	2/100	0.00688907	0.0549017	0	0	17.6371	87.7942	ID1;G0S2
cefalotin-6819	2/100	0.00688907	0.0549017	0	0	17.6371	87.7942	CRIP1;S100A9
naproxen-1828	2/100	0.00688907	0.0549017	0	0	17.6371	87.7942	S100A4;PPBP
haloperidol-5604	2/100	0.00688907	0.0549017	0	0	17.6371	87.7942	S100A9;NRGN
isocorydine-6843	2/100	0.00688907	0.0549017	0	0	17.6371	87.7942	PRF1;S100A9
etilefrine-2930	2/100	0.00688907	0.0549017	0	0	17.6371	87.7942	CCL2;NRGN
azacyclonol-5398	2/100	0.00688907	0.0549017	0	0	17.6371	87.7942	CRIP1;S100A9
sulfamethoxypyridazine-3609	2/100	0.00688907	0.0549017	0	0	17.6371	87.7942	PRF1;CRIP1
megestrol-6468	2/100	0.00688907	0.0549017	0	0	17.6371	87.7942	ID1;CRIP1
alvespimycin-4437	2/100	0.00688907	0.0549017	0	0	17.6371	87.7942	IL6;ID1
valproic acid-2669	2/100	0.00688907	0.0549017	0	0	17.6371	87.7942	PRF1;CCL2
tribenoside-6328	2/100	0.00688907	0.0549017	0	0	17.6371	87.7942	ID1;S100A4
heliotrine-3615	2/100	0.00688907	0.0549017	0	0	17.6371	87.7942	PRF1;CRIP1
solanine-2152	2/100	0.00688907	0.0549017	0	0	17.6371	87.7942	CRIP1;NRGN
STOCK1N-28457-6869	2/100	0.00688907	0.0549017	0	0	17.6371	87.7942	PRF1;S100A9
diflorasone-2142	2/100	0.00688907	0.0549017	0	0	17.6371	87.7942	CCL2;NRGN
sulfafurazole-5257	2/100	0.00688907	0.0549017	0	0	17.6371	87.7942	S100A4;NRGN
carisoprodol-4955	2/100	0.00688907	0.0549017	0	0	17.6371	87.7942	S100A4;NRGN
tanespimycin-1631	2/100	0.00688907	0.0549017	0	0	17.6371	87.7942	ID1;NRGN
puromycin-6711	2/100	0.00688907	0.0549017	0	0	17.6371	87.7942	FABP4;S100A9
glafenine-7018	2/100	0.00688907	0.0549017	0	0	17.6371	87.7942	ID1;S100A4
15-delta prostaglandin J2-564	2/100	0.00688907	0.0549017	0	0	17.6371	87.7942	BEX1;EMP2
demeclocycline-3604	2/100	0.00688907	0.0549017	0	0	17.6371	87.7942	S100A4;CRIP1
raloxifene-3480	2/100	0.00688907	0.0549017	0	0	17.6371	87.7942	S100A4;NRGN
crotamiton-5689	2/100	0.00688907	0.0549017	0	0	17.6371	87.7942	S100A4;S100A9
etacrynic acid-1565	2/100	0.00688907	0.0549017	0	0	17.6371	87.7942	BEX1;CCL2
capsaicin-5673	2/100	0.00688907	0.0549017	0	0	17.6371	87.7942	CRIP1;S100A9
dexamethasone-1396	2/100	0.00688907	0.0549017	0	0	17.6371	87.7942	BEX1;CCL2
amiodarone-5253	2/100	0.00688907	0.0549017	0	0	17.6371	87.7942	PRF1;NRGN
thioperamide-5635	2/100	0.00688907	0.0549017	0	0	17.6371	87.7942	CRIP1;S100A9
napelline-6824	2/100	0.00688907	0.0549017	0	0	17.6371	87.7942	CRIP1;NRGN
mimosine-6703	2/100	0.00688907	0.0549017	0	0	17.6371	87.7942	IL6;BEX1
norcyclobenzaprine-4190	2/100	0.00688907	0.0549017	0	0	17.6371	87.7942	IL6;ID1
oxybenzone-5410	2/100	0.00688907	0.0549017	0	0	17.6371	87.7942	CRIP1;S100A9
monorden-5579	2/100	0.00688907	0.0549017	0	0	17.6371	87.7942	ID1;S100A9
guanfacine-5621	2/100	0.00688907	0.0549017	0	0	17.6371	87.7942	PRF1;S100A9
fluorocurarine-6083	2/100	0.00688907	0.0549017	0	0	17.6371	87.7942	PRF1;S100A9
N-acetyl-L-leucine-3085	2/100	0.00688907	0.0549017	0	0	17.6371	87.7942	CRIP1;NRGN
diphenylpyraline-3640	2/100	0.00688907	0.0549017	0	0	17.6371	87.7942	FCN1;CRIP1
betaxolol-1592	2/100	0.00688907	0.0549017	0	0	17.6371	87.7942	CCL2;NRGN
picotamide-2233	2/100	0.00688907	0.0549017	0	0	17.6371	87.7942	S100A4;CRIP1
iocetamic acid-4600	2/100	0.00688907	0.0549017	0	0	17.6371	87.7942	BEX1;PRF1
cefaclor-6622	2/100	0.00688907	0.0549017	0	0	17.6371	87.7942	PRF1;MNDA
dipivefrine-1752	2/100	0.00688907	0.0549017	0	0	17.6371	87.7942	CCL2;CRIP1
enoxacin-4655	2/100	0.00688907	0.0549017	0	0	17.6371	87.7942	IL6;BEX1
minaprine-4814	2/100	0.00688907	0.0549017	0	0	17.6371	87.7942	ID1;CRIP1
monensin-4726	2/100	0.00688907	0.0549017	0	0	17.6371	87.7942	CRIP1;S100A9
apomorphine-6683	2/100	0.00688907	0.0549017	0	0	17.6371	87.7942	IL6;PRF1
SR-95531-4236	2/100	0.00688907	0.0549017	0	0	17.6371	87.7942	CCL2;NRGN
corticosterone-1307	2/100	0.00688907	0.0549017	0	0	17.6371	87.7942	CCL2;NRGN
PF-00875133-00-5967	1/100	0.117846	0.117846	0	0	8.36532	17.8882	CRIP1
CP-944629-7549	1/100	0.117846	0.117846	0	0	8.36532	17.8882	IL6
thalidomide-5990	1/100	0.117846	0.117846	0	0	8.36532	17.8882	CRIP1
bisoprolol-1287	1/100	0.117846	0.117846	0	0	8.36532	17.8882	CRIP1
carbenoxolone-3353	1/100	0.117846	0.117846	0	0	8.36532	17.8882	CRIP1
piribedil-2951	1/100	0.117846	0.117846	0	0	8.36532	17.8882	BEX1
Prestwick-1103-6019	1/100	0.117846	0.117846	0	0	8.36532	17.8882	CRIP1
thiethylperazine-5756	1/100	0.117846	0.117846	0	0	8.36532	17.8882	BEX1
benfluorex-5327	1/100	0.117846	0.117846	0	0	8.36532	17.8882	ID1
fulvestrant-2665	1/100	0.117846	0.117846	0	0	8.36532	17.8882	PRF1
lasalocid-6639	1/100	0.117846	0.117846	0	0	8.36532	17.8882	PRF1
syrosingopine-2753	1/100	0.117846	0.117846	0	0	8.36532	17.8882	GPRC5A
prochlorperazine-4439	1/100	0.117846	0.117846	0	0	8.36532	17.8882	BEX1
dipivefrine-2744	1/100	0.117846	0.117846	0	0	8.36532	17.8882	NRGN
pentetic acid-4669	1/100	0.117846	0.117846	0	0	8.36532	17.8882	IL6
semustine-7492	1/100	0.117846	0.117846	0	0	8.36532	17.8882	PRF1
dropropizine-5106	1/100	0.117846	0.117846	0	0	8.36532	17.8882	BEX1
bumetanide-7440	1/100	0.117846	0.117846	0	0	8.36532	17.8882	S100A9
equilin-3377	1/100	0.117846	0.117846	0	0	8.36532	17.8882	S100A9
cefaclor-2483	1/100	0.117846	0.117846	0	0	8.36532	17.8882	G0S2
alclometasone-2532	1/100	0.117846	0.117846	0	0	8.36532	17.8882	CCL2
diethylstilbestrol-4369	1/100	0.117846	0.117846	0	0	8.36532	17.8882	PRF1
etifenin-2477	1/100	0.117846	0.117846	0	0	8.36532	17.8882	G0S2
famprofazone-3928	1/100	0.117846	0.117846	0	0	8.36532	17.8882	PRF1
phenelzine-2357	1/100	0.117846	0.117846	0	0	8.36532	17.8882	NRGN
dexibuprofen-6471	1/100	0.117846	0.117846	0	0	8.36532	17.8882	CRIP1
cefotaxime-7186	1/100	0.117846	0.117846	0	0	8.36532	17.8882	NRGN
piroxicam-2089	1/100	0.117846	0.117846	0	0	8.36532	17.8882	PPBP
omeprazole-4951	1/100	0.117846	0.117846	0	0	8.36532	17.8882	S100A4
CP-319743-7486	1/100	0.117846	0.117846	0	0	8.36532	17.8882	S100A9
ornidazole-5064	1/100	0.117846	0.117846	0	0	8.36532	17.8882	NRGN
neomycin-1383	1/100	0.117846	0.117846	0	0	8.36532	17.8882	NRGN
phenindione-2868	1/100	0.117846	0.117846	0	0	8.36532	17.8882	NRGN
fulvestrant-1146	1/100	0.117846	0.117846	0	0	8.36532	17.8882	CRIP1
sodium phenylbutyrate-411	1/100	0.117846	0.117846	0	0	8.36532	17.8882	EMP2
LY-294002-6198	1/100	0.117846	0.117846	0	0	8.36532	17.8882	CCL2
nizatidine-5406	1/100	0.117846	0.117846	0	0	8.36532	17.8882	S100A9
coralyne-1298	1/100	0.117846	0.117846	0	0	8.36532	17.8882	CRIP1
dihydrostreptomycin-1391	1/100	0.117846	0.117846	0	0	8.36532	17.8882	NRGN
phentolamine-4336	1/100	0.117846	0.117846	0	0	8.36532	17.8882	IL6
decamethonium bromide-7353	1/100	0.117846	0.117846	0	0	8.36532	17.8882	S100A4
ciprofloxacin-6700	1/100	0.117846	0.117846	0	0	8.36532	17.8882	BEX1
tobramycin-2841	1/100	0.117846	0.117846	0	0	8.36532	17.8882	NRGN
N6-methyladenosine-2626	1/100	0.117846	0.117846	0	0	8.36532	17.8882	S100A4
pilocarpine-3300	1/100	0.117846	0.117846	0	0	8.36532	17.8882	NRGN
LY-294002-5965	1/100	0.117846	0.117846	0	0	8.36532	17.8882	CRIP1
spironolactone-2226	1/100	0.117846	0.117846	0	0	8.36532	17.8882	NRGN
dipyridamole-4656	1/100	0.117846	0.117846	0	0	8.36532	17.8882	BEX1
iproniazid-2288	1/100	0.117846	0.117846	0	0	8.36532	17.8882	S100A9
selegiline-2826	1/100	0.117846	0.117846	0	0	8.36532	17.8882	NRGN
gliclazide-5089	1/100	0.117846	0.117846	0	0	8.36532	17.8882	BEX1
LY-294002-6186	1/100	0.117846	0.117846	0	0	8.36532	17.8882	CCL2
haloperidol-5638	1/100	0.117846	0.117846	0	0	8.36532	17.8882	S100A9
tolazamide-2842	1/100	0.117846	0.117846	0	0	8.36532	17.8882	NRGN
7-aminocephalosporanic acid-4242	1/100	0.117846	0.117846	0	0	8.36532	17.8882	CCL2
haloperidol-1539	1/100	0.117846	0.117846	0	0	8.36532	17.8882	NRGN
Prestwick-559-1728	1/100	0.117846	0.117846	0	0	8.36532	17.8882	CRIP1
iobenguane-6002	1/100	0.117846	0.117846	0	0	8.36532	17.8882	S100A4
Prestwick-664-4275	1/100	0.117846	0.117846	0	0	8.36532	17.8882	BEX1
hydralazine-4746	1/100	0.117846	0.117846	0	0	8.36532	17.8882	S100A4
nifenazone-2122	1/100	0.117846	0.117846	0	0	8.36532	17.8882	PPBP
nordihydroguaiaretic acid-415	1/100	0.117846	0.117846	0	0	8.36532	17.8882	NRGN
sirolimus-6958	1/100	0.117846	0.117846	0	0	8.36532	17.8882	S100A4
foliosidine-3636	1/100	0.117846	0.117846	0	0	8.36532	17.8882	CRIP1
benzylpenicillin-6155	1/100	0.117846	0.117846	0	0	8.36532	17.8882	NKG7
isoxicam-1862	1/100	0.117846	0.117846	0	0	8.36532	17.8882	NKG7
amoxapine-6650	1/100	0.117846	0.117846	0	0	8.36532	17.8882	ID1
betonicine-3642	1/100	0.117846	0.117846	0	0	8.36532	17.8882	CRIP1
deferoxamine-4317	1/100	0.117846	0.117846	0	0	8.36532	17.8882	BEX1
roxarsone-2950	1/100	0.117846	0.117846	0	0	8.36532	17.8882	CRIP1
iodixanol-4848	1/100	0.117846	0.117846	0	0	8.36532	17.8882	PRF1
thiocolchicoside-5095	1/100	0.117846	0.117846	0	0	8.36532	17.8882	BEX1
6-benzylaminopurine-3623	1/100	0.117846	0.117846	0	0	8.36532	17.8882	NRGN
pyrimethamine-4779	1/100	0.117846	0.117846	0	0	8.36532	17.8882	ID1
LY-294002-6987	1/100	0.117846	0.117846	0	0	8.36532	17.8882	S100A4
naphazoline-4949	1/100	0.117846	0.117846	0	0	8.36532	17.8882	NRGN
adenosine phosphate-5359	1/100	0.117846	0.117846	0	0	8.36532	17.8882	ID1
hydrocotarnine-6827	1/100	0.117846	0.117846	0	0	8.36532	17.8882	PRF1
tropicamide-3619	1/100	0.117846	0.117846	0	0	8.36532	17.8882	S100A4
levobunolol-3015	1/100	0.117846	0.117846	0	0	8.36532	17.8882	CRIP1
Prestwick-665-6041	1/100	0.117846	0.117846	0	0	8.36532	17.8882	S100A4
naftidrofuryl-6687	1/100	0.117846	0.117846	0	0	8.36532	17.8882	PRF1
Chicago Sky Blue 6B-1330	1/100	0.117846	0.117846	0	0	8.36532	17.8882	CCL2
lidocaine-1999	1/100	0.117846	0.117846	0	0	8.36532	17.8882	CCL2
tolmetin-3347	1/100	0.117846	0.117846	0	0	8.36532	17.8882	CRIP1
quinisocaine-2807	1/100	0.117846	0.117846	0	0	8.36532	17.8882	NRGN
valproic acid-2682	1/100	0.117846	0.117846	0	0	8.36532	17.8882	SCGB1A1
allantoin-1678	1/100	0.117846	0.117846	0	0	8.36532	17.8882	NRGN
(-)-MK-801-6458	1/100	0.117846	0.117846	0	0	8.36532	17.8882	CRIP1
dobutamine-5386	1/100	0.117846	0.117846	0	0	8.36532	17.8882	CRIP1
sulfamethoxazole-3667	1/100	0.117846	0.117846	0	0	8.36532	17.8882	IL6
molsidomine-6325	1/100	0.117846	0.117846	0	0	8.36532	17.8882	S100A9
ticarcillin-5829	1/100	0.117846	0.117846	0	0	8.36532	17.8882	FABP4
prochlorperazine-2675	1/100	0.117846	0.117846	0	0	8.36532	17.8882	S100A9
brompheniramine-4131	1/100	0.117846	0.117846	0	0	8.36532	17.8882	PRF1
apigenin-3257	1/100	0.117846	0.117846	0	0	8.36532	17.8882	ID1
ketoprofen-2316	1/100	0.117846	0.117846	0	0	8.36532	17.8882	PRF1
Prestwick-1082-7027	1/100	0.117846	0.117846	0	0	8.36532	17.8882	NRGN
paromomycin-4420	1/100	0.117846	0.117846	0	0	8.36532	17.8882	S100A4
LY-294002-4463	1/100	0.117846	0.117846	0	0	8.36532	17.8882	BEX1
sulfanilamide-3449	1/100	0.117846	0.117846	0	0	8.36532	17.8882	NRGN
LY-294002-1177	1/100	0.117846	0.117846	0	0	8.36532	17.8882	CCL2
bisoprolol-5348	1/100	0.117846	0.117846	0	0	8.36532	17.8882	NRGN
W-13-643	1/100	0.117846	0.117846	0	0	8.36532	17.8882	NRGN
corynanthine-4227	1/100	0.117846	0.117846	0	0	8.36532	17.8882	CCL2
tetraethylenepentamine-574	1/100	0.117846	0.117846	0	0	8.36532	17.8882	NRGN
androsterone-5696	1/100	0.117846	0.117846	0	0	8.36532	17.8882	S100A4
estradiol-6957	1/100	0.117846	0.117846	0	0	8.36532	17.8882	S100A4
myosmine-4759	1/100	0.117846	0.117846	0	0	8.36532	17.8882	S100A9
isosorbide-4742	1/100	0.117846	0.117846	0	0	8.36532	17.8882	CRIP1
trifluoperazine-5584	1/100	0.117846	0.117846	0	0	8.36532	17.8882	PRF1
ribostamycin-2705	1/100	0.117846	0.117846	0	0	8.36532	17.8882	PRF1
trichostatin A-6910	1/100	0.117846	0.117846	0	0	8.36532	17.8882	ID1
pivmecillinam-7312	1/100	0.117846	0.117846	0	0	8.36532	17.8882	BEX1
nafcillin-3323	1/100	0.117846	0.117846	0	0	8.36532	17.8882	S100A9
fluphenazine-1577	1/100	0.117846	0.117846	0	0	8.36532	17.8882	CCL2
0316684-0000-7057	1/100	0.117846	0.117846	0	0	8.36532	17.8882	IL6
zardaverine-2926	1/100	0.117846	0.117846	0	0	8.36532	17.8882	CCL2
vorinostat-6179	1/100	0.117846	0.117846	0	0	8.36532	17.8882	CCL2
CP-320650-01-4379	1/100	0.117846	0.117846	0	0	8.36532	17.8882	S100A9
sirolimus-1242	1/100	0.117846	0.117846	0	0	8.36532	17.8882	FABP4
(-)-isoprenaline-4495	1/100	0.117846	0.117846	0	0	8.36532	17.8882	G0S2
tanespimycin-6985	1/100	0.117846	0.117846	0	0	8.36532	17.8882	ID1
diethylcarbamazine-7425	1/100	0.117846	0.117846	0	0	8.36532	17.8882	S100A9
probucol-592	1/100	0.117846	0.117846	0	0	8.36532	17.8882	S100A9
lanatoside C-2193	1/100	0.117846	0.117846	0	0	8.36532	17.8882	CCL2
exisulind-314	1/100	0.117846	0.117846	0	0	8.36532	17.8882	IL6
nomegestrol-5461	1/100	0.117846	0.117846	0	0	8.36532	17.8882	S100A9
letrozole-2916	1/100	0.117846	0.117846	0	0	8.36532	17.8882	CCL2
riluzole-4689	1/100	0.117846	0.117846	0	0	8.36532	17.8882	CRIP1
citiolone-3836	1/100	0.117846	0.117846	0	0	8.36532	17.8882	S100A9
triamcinolone-5835	1/100	0.117846	0.117846	0	0	8.36532	17.8882	IL6
naftopidil-4193	1/100	0.117846	0.117846	0	0	8.36532	17.8882	NRGN
tolnaftate-4805	1/100	0.117846	0.117846	0	0	8.36532	17.8882	NRGN
tomatidine-1754	1/100	0.117846	0.117846	0	0	8.36532	17.8882	NRGN
danazol-2038	1/100	0.117846	0.117846	0	0	8.36532	17.8882	CCL2
clofazimine-5642	1/100	0.117846	0.117846	0	0	8.36532	17.8882	CRIP1
metitepine-1616	1/100	0.117846	0.117846	0	0	8.36532	17.8882	BEX1
Prestwick-1084-7125	1/100	0.117846	0.117846	0	0	8.36532	17.8882	CRIP1
tolfenamic acid-6354	1/100	0.117846	0.117846	0	0	8.36532	17.8882	BEX1
metaraminol-7368	1/100	0.117846	0.117846	0	0	8.36532	17.8882	FABP4
fulvestrant-5598	1/100	0.117846	0.117846	0	0	8.36532	17.8882	PRF1
flucloxacillin-3128	1/100	0.117846	0.117846	0	0	8.36532	17.8882	CLEC3B
sirolimus-5927	1/100	0.117846	0.117846	0	0	8.36532	17.8882	PRF1
propranolol-5358	1/100	0.117846	0.117846	0	0	8.36532	17.8882	ID1
nalbuphine-2063	1/100	0.117846	0.117846	0	0	8.36532	17.8882	PPBP
Prestwick-967-4833	1/100	0.117846	0.117846	0	0	8.36532	17.8882	PRF1
saquinavir-3549	1/100	0.117846	0.117846	0	0	8.36532	17.8882	S100A4
buflomedil-1338	1/100	0.117846	0.117846	0	0	8.36532	17.8882	CCL2
diloxanide-3399	1/100	0.117846	0.117846	0	0	8.36532	17.8882	CRIP1
rofecoxib-371	1/100	0.117846	0.117846	0	0	8.36532	17.8882	NKG7
monorden-6938	1/100	0.117846	0.117846	0	0	8.36532	17.8882	ID1
thiamine-7479	1/100	0.117846	0.117846	0	0	8.36532	17.8882	NRGN
leflunomide-6102	1/100	0.117846	0.117846	0	0	8.36532	17.8882	CRIP1
alvespimycin-6973	1/100	0.117846	0.117846	0	0	8.36532	17.8882	ID1
valproic acid-6969	1/100	0.117846	0.117846	0	0	8.36532	17.8882	NRGN
ketoconazole-2640	1/100	0.117846	0.117846	0	0	8.36532	17.8882	ID1
aminohippuric acid-3076	1/100	0.117846	0.117846	0	0	8.36532	17.8882	BEX1
bemegride-3389	1/100	0.117846	0.117846	0	0	8.36532	17.8882	S100A9
fenspiride-2269	1/100	0.117846	0.117846	0	0	8.36532	17.8882	S100A9
scopolamine-4219	1/100	0.117846	0.117846	0	0	8.36532	17.8882	BEX1
thioridazine-2690	1/100	0.117846	0.117846	0	0	8.36532	17.8882	PRF1
(-)-atenolol-6725	1/100	0.117846	0.117846	0	0	8.36532	17.8882	BEX1
diazoxide-2052	1/100	0.117846	0.117846	0	0	8.36532	17.8882	PPBP
prochlorperazine-455	1/100	0.117846	0.117846	0	0	8.36532	17.8882	PRF1
harmaline-2149	1/100	0.117846	0.117846	0	0	8.36532	17.8882	NRGN
nizatidine-3385	1/100	0.117846	0.117846	0	0	8.36532	17.8882	NRGN
azacitidine-4128	1/100	0.117846	0.117846	0	0	8.36532	17.8882	ID1
antazoline-7128	1/100	0.117846	0.117846	0	0	8.36532	17.8882	CRIP1
fursultiamine-4975	1/100	0.117846	0.117846	0	0	8.36532	17.8882	NRGN
ciclosporin-4411	1/100	0.117846	0.117846	0	0	8.36532	17.8882	CRIP1
quercetin-2859	1/100	0.117846	0.117846	0	0	8.36532	17.8882	ID1
Prestwick-983-6520	1/100	0.117846	0.117846	0	0	8.36532	17.8882	NRGN
tretinoin-4435	1/100	0.117846	0.117846	0	0	8.36532	17.8882	IL6
pyrithyldione-6801	1/100	0.117846	0.117846	0	0	8.36532	17.8882	S100A9
spiradoline-4375	1/100	0.117846	0.117846	0	0	8.36532	17.8882	S100A9
etamivan-2879	1/100	0.117846	0.117846	0	0	8.36532	17.8882	NRGN
kawain-3670	1/100	0.117846	0.117846	0	0	8.36532	17.8882	PRF1
tanespimycin-1225	1/100	0.117846	0.117846	0	0	8.36532	17.8882	NRGN
metformin-5487	1/100	0.117846	0.117846	0	0	8.36532	17.8882	PRF1
CAY-10397-7087	1/100	0.117846	0.117846	0	0	8.36532	17.8882	CRIP1
valproic acid-5600	1/100	0.117846	0.117846	0	0	8.36532	17.8882	PRF1
staurosporine-312	1/100	0.117846	0.117846	0	0	8.36532	17.8882	ID1
celecoxib-482	1/100	0.117846	0.117846	0	0	8.36532	17.8882	PPBP
xylometazoline-2270	1/100	0.117846	0.117846	0	0	8.36532	17.8882	S100A4
haloperidol-4678	1/100	0.117846	0.117846	0	0	8.36532	17.8882	BEX1
antimycin A-2098	1/100	0.117846	0.117846	0	0	8.36532	17.8882	PPBP
resveratrol-1715	1/100	0.117846	0.117846	0	0	8.36532	17.8882	CCL2
ivermectin-2051	1/100	0.117846	0.117846	0	0	8.36532	17.8882	NRGN
fludrocortisone-2368	1/100	0.117846	0.117846	0	0	8.36532	17.8882	CCL2
lomefloxacin-3620	1/100	0.117846	0.117846	0	0	8.36532	17.8882	CRIP1
trichostatin A-1306	1/100	0.117846	0.117846	0	0	8.36532	17.8882	CCL2
rosiglitazone-5593	1/100	0.117846	0.117846	0	0	8.36532	17.8882	NRGN
pirenperone-4679	1/100	0.117846	0.117846	0	0	8.36532	17.8882	IL6
3-acetylcoumarin-5624	1/100	0.117846	0.117846	0	0	8.36532	17.8882	CRIP1
CP-319743-7532	1/100	0.117846	0.117846	0	0	8.36532	17.8882	NRGN
cycloserine-7134	1/100	0.117846	0.117846	0	0	8.36532	17.8882	FABP4
nicergoline-1374	1/100	0.117846	0.117846	0	0	8.36532	17.8882	NRGN
glibenclamide-3163	1/100	0.117846	0.117846	0	0	8.36532	17.8882	S100A4
6-benzylaminopurine-2313	1/100	0.117846	0.117846	0	0	8.36532	17.8882	CRIP1
Trolox C-2883	1/100	0.117846	0.117846	0	0	8.36532	17.8882	NRGN
acemetacin-2411	1/100	0.117846	0.117846	0	0	8.36532	17.8882	FCGR3B
fluocinonide-4314	1/100	0.117846	0.117846	0	0	8.36532	17.8882	BEX1
acacetin-6044	1/100	0.117846	0.117846	0	0	8.36532	17.8882	ID1
syrosingopine-6213	1/100	0.117846	0.117846	0	0	8.36532	17.8882	GPRC5A
estradiol-5955	1/100	0.117846	0.117846	0	0	8.36532	17.8882	S100A9
finasteride-4766	1/100	0.117846	0.117846	0	0	8.36532	17.8882	PRF1
riboflavin-6822	1/100	0.117846	0.117846	0	0	8.36532	17.8882	CRIP1
metyrapone-5667	1/100	0.117846	0.117846	0	0	8.36532	17.8882	S100A9
PHA-00851261E-3854	1/100	0.117846	0.117846	0	0	8.36532	17.8882	S100A9
genistein-5595	1/100	0.117846	0.117846	0	0	8.36532	17.8882	S100A9
0297417-0002B-6902	1/100	0.117846	0.117846	0	0	8.36532	17.8882	ID1
pentamidine-2473	1/100	0.117846	0.117846	0	0	8.36532	17.8882	G0S2
neomycin-2229	1/100	0.117846	0.117846	0	0	8.36532	17.8882	S100A4
triamterene-6010	1/100	0.117846	0.117846	0	0	8.36532	17.8882	PRF1
5230742-970	1/100	0.117846	0.117846	0	0	8.36532	17.8882	NRGN
terguride-6299	1/100	0.117846	0.117846	0	0	8.36532	17.8882	GPRC5A
geldanamycin-5588	1/100	0.117846	0.117846	0	0	8.36532	17.8882	ID1
aminophenazone-6818	1/100	0.117846	0.117846	0	0	8.36532	17.8882	CRIP1
azaperone-7231	1/100	0.117846	0.117846	0	0	8.36532	17.8882	NRGN
Prestwick-691-2813	1/100	0.117846	0.117846	0	0	8.36532	17.8882	FCN1
azacitidine-3348	1/100	0.117846	0.117846	0	0	8.36532	17.8882	ID1
metrifonate-1797	1/100	0.117846	0.117846	0	0	8.36532	17.8882	PPBP
clozapine-4453	1/100	0.117846	0.117846	0	0	8.36532	17.8882	BEX1
tanespimycin-428	1/100	0.117846	0.117846	0	0	8.36532	17.8882	ID1
flavoxate-5427	1/100	0.117846	0.117846	0	0	8.36532	17.8882	S100A9
quercetin-4846	1/100	0.117846	0.117846	0	0	8.36532	17.8882	ID1
chloropyramine-3350	1/100	0.117846	0.117846	0	0	8.36532	17.8882	CRIP1
orciprenaline-2845	1/100	0.117846	0.117846	0	0	8.36532	17.8882	NRGN
tetracycline-6233	1/100	0.117846	0.117846	0	0	8.36532	17.8882	S100A4
pivampicillin-5465	1/100	0.117846	0.117846	0	0	8.36532	17.8882	PRF1
acacetin-3942	1/100	0.117846	0.117846	0	0	8.36532	17.8882	ID1
atropine oxide-4476	1/100	0.117846	0.117846	0	0	8.36532	17.8882	BEX1
rottlerin-914	1/100	0.117846	0.117846	0	0	8.36532	17.8882	CRIP1
hydrastinine-1436	1/100	0.117846	0.117846	0	0	8.36532	17.8882	NRGN
glibenclamide-1546	1/100	0.117846	0.117846	0	0	8.36532	17.8882	CCL2
HNMPA-(AM)3-583	1/100	0.117846	0.117846	0	0	8.36532	17.8882	PRF1
flunisolide-2168	1/100	0.117846	0.117846	0	0	8.36532	17.8882	CCL2
tranexamic acid-1401	1/100	0.117846	0.117846	0	0	8.36532	17.8882	NRGN
methylprednisolone-1567	1/100	0.117846	0.117846	0	0	8.36532	17.8882	CCL2
Prestwick-689-6076	1/100	0.117846	0.117846	0	0	8.36532	17.8882	CRIP1
iproniazid-1442	1/100	0.117846	0.117846	0	0	8.36532	17.8882	BEX1
harmol-1750	1/100	0.117846	0.117846	0	0	8.36532	17.8882	S100A8
lomustine-7094	1/100	0.117846	0.117846	0	0	8.36532	17.8882	G0S2
aminoglutethimide-7463	1/100	0.117846	0.117846	0	0	8.36532	17.8882	NRGN
etamsylate-7335	1/100	0.117846	0.117846	0	0	8.36532	17.8882	S100A4
sulfadiazine-1810	1/100	0.117846	0.117846	0	0	8.36532	17.8882	PPBP
isoxicam-1820	1/100	0.117846	0.117846	0	0	8.36532	17.8882	PPBP
valproic acid-6941	1/100	0.117846	0.117846	0	0	8.36532	17.8882	NRGN
tranylcypromine-2264	1/100	0.117846	0.117846	0	0	8.36532	17.8882	S100A9
disulfiram-2215	1/100	0.117846	0.117846	0	0	8.36532	17.8882	NRGN
fluphenazine-5597	1/100	0.117846	0.117846	0	0	8.36532	17.8882	PRF1
tanespimycin-998	1/100	0.117846	0.117846	0	0	8.36532	17.8882	ID1
ofloxacin-2340	1/100	0.117846	0.117846	0	0	8.36532	17.8882	NRGN
ursodeoxycholic acid-6484	1/100	0.117846	0.117846	0	0	8.36532	17.8882	NRGN
vinpocetine-1557	1/100	0.117846	0.117846	0	0	8.36532	17.8882	MNDA
vorinostat-2680	1/100	0.117846	0.117846	0	0	8.36532	17.8882	CCL2
6-bromoindirubin-3'-oxime-7044	1/100	0.117846	0.117846	0	0	8.36532	17.8882	GPRC5A
tiapride-4686	1/100	0.117846	0.117846	0	0	8.36532	17.8882	S100A9
guanethidine-1554	1/100	0.117846	0.117846	0	0	8.36532	17.8882	BEX1
cefmetazole-7222	1/100	0.117846	0.117846	0	0	8.36532	17.8882	S100A4
valdecoxib-6403	1/100	0.117846	0.117846	0	0	8.36532	17.8882	PRF1
carbamazepine-1683	1/100	0.117846	0.117846	0	0	8.36532	17.8882	S100A4
PHA-00745360-3910	1/100	0.117846	0.117846	0	0	8.36532	17.8882	CRIP1
isopropamide iodide-6781	1/100	0.117846	0.117846	0	0	8.36532	17.8882	S100A9
netilmicin-6005	1/100	0.117846	0.117846	0	0	8.36532	17.8882	CRIP1
ranitidine-1404	1/100	0.117846	0.117846	0	0	8.36532	17.8882	NRGN
lovastatin-2494	1/100	0.117846	0.117846	0	0	8.36532	17.8882	G0S2
valproic acid-348	1/100	0.117846	0.117846	0	0	8.36532	17.8882	PRF1
octopamine-5469	1/100	0.117846	0.117846	0	0	8.36532	17.8882	NRGN
ketorolac-5988	1/100	0.117846	0.117846	0	0	8.36532	17.8882	S100A4
SR-95531-4820	1/100	0.117846	0.117846	0	0	8.36532	17.8882	ID1
amphotericin B-5404	1/100	0.117846	0.117846	0	0	8.36532	17.8882	CRIP1
fludrocortisone-282	1/100	0.117846	0.117846	0	0	8.36532	17.8882	S100A4
phenformin-2350	1/100	0.117846	0.117846	0	0	8.36532	17.8882	NRGN
nomegestrol-6362	1/100	0.117846	0.117846	0	0	8.36532	17.8882	BEX1
harmol-6022	1/100	0.117846	0.117846	0	0	8.36532	17.8882	CRIP1
sulfamerazine-3718	1/100	0.117846	0.117846	0	0	8.36532	17.8882	PRF1
thioperamide-3392	1/100	0.117846	0.117846	0	0	8.36532	17.8882	CRIP1
pronetalol-4104	1/100	0.117846	0.117846	0	0	8.36532	17.8882	CRIP1
alpha-yohimbine-6274	1/100	0.117846	0.117846	0	0	8.36532	17.8882	S100A4
SB-203580-6915	1/100	0.117846	0.117846	0	0	8.36532	17.8882	S100A9
fenoterol-6331	1/100	0.117846	0.117846	0	0	8.36532	17.8882	G0S2
mefloquine-2048	1/100	0.117846	0.117846	0	0	8.36532	17.8882	GPRC5A
cefsulodin-2988	1/100	0.117846	0.117846	0	0	8.36532	17.8882	PRF1
cyclopenthiazide-4813	1/100	0.117846	0.117846	0	0	8.36532	17.8882	CRIP1
tolnaftate-2001	1/100	0.117846	0.117846	0	0	8.36532	17.8882	CCL2
fulvestrant-5235	1/100	0.117846	0.117846	0	0	8.36532	17.8882	NRGN
trichostatin A-2035	1/100	0.117846	0.117846	0	0	8.36532	17.8882	CCL2
scopolamine-3018	1/100	0.117846	0.117846	0	0	8.36532	17.8882	PRF1
mefenamic acid-1863	1/100	0.117846	0.117846	0	0	8.36532	17.8882	CCL2
digitoxigenin-1339	1/100	0.117846	0.117846	0	0	8.36532	17.8882	CCL2
amiloride-1890	1/100	0.117846	0.117846	0	0	8.36532	17.8882	NRGN
famotidine-5011	1/100	0.117846	0.117846	0	0	8.36532	17.8882	S100A9
LM-1685-612	1/100	0.117846	0.117846	0	0	8.36532	17.8882	NRGN
Prestwick-685-7382	1/100	0.117846	0.117846	0	0	8.36532	17.8882	BEX1
ranitidine-5425	1/100	0.117846	0.117846	0	0	8.36532	17.8882	S100A4
isoflupredone-1873	1/100	0.117846	0.117846	0	0	8.36532	17.8882	CCL2
hexetidine-5420	1/100	0.117846	0.117846	0	0	8.36532	17.8882	S100A9
alvespimycin-1051	1/100	0.117846	0.117846	0	0	8.36532	17.8882	ID1
milrinone-3552	1/100	0.117846	0.117846	0	0	8.36532	17.8882	S100A4
epitiostanol-4204	1/100	0.117846	0.117846	0	0	8.36532	17.8882	IL6
esculetin-6499	1/100	0.117846	0.117846	0	0	8.36532	17.8882	PRF1
imatinib-483	1/100	0.117846	0.117846	0	0	8.36532	17.8882	PPBP
protriptyline-3119	1/100	0.117846	0.117846	0	0	8.36532	17.8882	S100A9
ciclacillin-3800	1/100	0.117846	0.117846	0	0	8.36532	17.8882	PRF1
LY-294002-401	1/100	0.117846	0.117846	0	0	8.36532	17.8882	NRGN
amikacin-6715	1/100	0.117846	0.117846	0	0	8.36532	17.8882	ID1
naproxen-7146	1/100	0.117846	0.117846	0	0	8.36532	17.8882	CRIP1
theophylline-4228	1/100	0.117846	0.117846	0	0	8.36532	17.8882	CCL2
spiperone-5777	1/100	0.117846	0.117846	0	0	8.36532	17.8882	NRGN
5255229-833	1/100	0.117846	0.117846	0	0	8.36532	17.8882	S100A4
tropicamide-2309	1/100	0.117846	0.117846	0	0	8.36532	17.8882	PRF1
mephenesin-4698	1/100	0.117846	0.117846	0	0	8.36532	17.8882	S100A9
valproic acid-2700	1/100	0.117846	0.117846	0	0	8.36532	17.8882	PRF1
scopoletin-3131	1/100	0.117846	0.117846	0	0	8.36532	17.8882	CRIP1
butein-582	1/100	0.117846	0.117846	0	0	8.36532	17.8882	PRF1
haloperidol-5200	1/100	0.117846	0.117846	0	0	8.36532	17.8882	NRGN
LY-294002-1652	1/100	0.117846	0.117846	0	0	8.36532	17.8882	S100A4
iopamidol-2732	1/100	0.117846	0.117846	0	0	8.36532	17.8882	PRF1
N6-methyladenosine-6732	1/100	0.117846	0.117846	0	0	8.36532	17.8882	BEX1
methylergometrine-6704	1/100	0.117846	0.117846	0	0	8.36532	17.8882	ID1
pioglitazone-7083	1/100	0.117846	0.117846	0	0	8.36532	17.8882	S100A4
rolipram-3072	1/100	0.117846	0.117846	0	0	8.36532	17.8882	CCL2
chlorprothixene-6692	1/100	0.117846	0.117846	0	0	8.36532	17.8882	PRF1
dicloxacillin-5012	1/100	0.117846	0.117846	0	0	8.36532	17.8882	S100A9
penbutolol-2972	1/100	0.117846	0.117846	0	0	8.36532	17.8882	CRIP1
metrizamide-4075	1/100	0.117846	0.117846	0	0	8.36532	17.8882	PRF1
methyldopa-5637	1/100	0.117846	0.117846	0	0	8.36532	17.8882	S100A9
pindolol-1392	1/100	0.117846	0.117846	0	0	8.36532	17.8882	NRGN
8-azaguanine-1791	1/100	0.117846	0.117846	0	0	8.36532	17.8882	ID1
betazole-1690	1/100	0.117846	0.117846	0	0	8.36532	17.8882	NRGN
oxymetazoline-1431	1/100	0.117846	0.117846	0	0	8.36532	17.8882	BEX1
disulfiram-5729	1/100	0.117846	0.117846	0	0	8.36532	17.8882	IL6
6-benzylaminopurine-3726	1/100	0.117846	0.117846	0	0	8.36532	17.8882	PRF1
etamivan-1730	1/100	0.117846	0.117846	0	0	8.36532	17.8882	CCL2
bretylium tosilate-5020	1/100	0.117846	0.117846	0	0	8.36532	17.8882	PRF1
glimepiride-6628	1/100	0.117846	0.117846	0	0	8.36532	17.8882	PRF1
tranexamic acid-2248	1/100	0.117846	0.117846	0	0	8.36532	17.8882	S100A9
nabumetone-6327	1/100	0.117846	0.117846	0	0	8.36532	17.8882	FABP4
pizotifen-5072	1/100	0.117846	0.117846	0	0	8.36532	17.8882	BEX1
nefopam-3730	1/100	0.117846	0.117846	0	0	8.36532	17.8882	PRF1
proglumide-3861	1/100	0.117846	0.117846	0	0	8.36532	17.8882	NRGN
SC-58125-542	1/100	0.117846	0.117846	0	0	8.36532	17.8882	CCL2
BCB000038-7542	1/100	0.117846	0.117846	0	0	8.36532	17.8882	S100A4
BCB000038-7547	1/100	0.117846	0.117846	0	0	8.36532	17.8882	CLEC3B
xamoterol-3401	1/100	0.117846	0.117846	0	0	8.36532	17.8882	S100A9
daunorubicin-7511	1/100	0.117846	0.117846	0	0	8.36532	17.8882	ID1
trichostatin A-1971	1/100	0.117846	0.117846	0	0	8.36532	17.8882	CCL2
glycopyrronium bromide-4709	1/100	0.117846	0.117846	0	0	8.36532	17.8882	PRF1
geldanamycin-6187	1/100	0.117846	0.117846	0	0	8.36532	17.8882	CCL2
NS-398-6911	1/100	0.117846	0.117846	0	0	8.36532	17.8882	ID1
3-acetamidocoumarin-4601	1/100	0.117846	0.117846	0	0	8.36532	17.8882	BEX1
zoxazolamine-1270	1/100	0.117846	0.117846	0	0	8.36532	17.8882	NRGN
tanespimycin-831	1/100	0.117846	0.117846	0	0	8.36532	17.8882	ID1
dexpropranolol-3553	1/100	0.117846	0.117846	0	0	8.36532	17.8882	S100A4
labetalol-6809	1/100	0.117846	0.117846	0	0	8.36532	17.8882	NRGN
artemisinin-7007	1/100	0.117846	0.117846	0	0	8.36532	17.8882	S100A4
etofenamate-2907	1/100	0.117846	0.117846	0	0	8.36532	17.8882	CCL2
alfadolone-6506	1/100	0.117846	0.117846	0	0	8.36532	17.8882	PRF1
sulmazole-4127	1/100	0.117846	0.117846	0	0	8.36532	17.8882	S100A9
etamsylate-4399	1/100	0.117846	0.117846	0	0	8.36532	17.8882	CRIP1
prednisone-4577	1/100	0.117846	0.117846	0	0	8.36532	17.8882	PRF1
todralazine-1677	1/100	0.117846	0.117846	0	0	8.36532	17.8882	S100A4
estropipate-6808	1/100	0.117846	0.117846	0	0	8.36532	17.8882	S100A9
ethaverine-3375	1/100	0.117846	0.117846	0	0	8.36532	17.8882	CRIP1
trioxysalen-5736	1/100	0.117846	0.117846	0	0	8.36532	17.8882	FABP4
acetohexamide-1870	1/100	0.117846	0.117846	0	0	8.36532	17.8882	NKG7
carcinine-4225	1/100	0.117846	0.117846	0	0	8.36532	17.8882	CCL2
clemastine-2412	1/100	0.117846	0.117846	0	0	8.36532	17.8882	FCGR3B
N-acetyl-L-leucine-5683	1/100	0.117846	0.117846	0	0	8.36532	17.8882	S100A9
carbachol-3042	1/100	0.117846	0.117846	0	0	8.36532	17.8882	CCL2
florfenicol-3083	1/100	0.117846	0.117846	0	0	8.36532	17.8882	PRF1
allantoin-1842	1/100	0.117846	0.117846	0	0	8.36532	17.8882	CRIP1
sulfachlorpyridazine-4326	1/100	0.117846	0.117846	0	0	8.36532	17.8882	BEX1
tremorine-3196	1/100	0.117846	0.117846	0	0	8.36532	17.8882	NRGN
pyrazinamide-4962	1/100	0.117846	0.117846	0	0	8.36532	17.8882	NRGN
methocarbamol-2274	1/100	0.117846	0.117846	0	0	8.36532	17.8882	S100A9
mesoridazine-7017	1/100	0.117846	0.117846	0	0	8.36532	17.8882	S100A4
antazoline-6775	1/100	0.117846	0.117846	0	0	8.36532	17.8882	S100A4
5194442-6553	1/100	0.117846	0.117846	0	0	8.36532	17.8882	BEX1
enoxacin-5251	1/100	0.117846	0.117846	0	0	8.36532	17.8882	S100A9
diflunisal-1908	1/100	0.117846	0.117846	0	0	8.36532	17.8882	NRGN
thiamazole-3815	1/100	0.117846	0.117846	0	0	8.36532	17.8882	PRF1
aceclofenac-7269	1/100	0.117846	0.117846	0	0	8.36532	17.8882	CRIP1
mesoridazine-1725	1/100	0.117846	0.117846	0	0	8.36532	17.8882	NRGN
dropropizine-7429	1/100	0.117846	0.117846	0	0	8.36532	17.8882	S100A4
dl-alpha tocopherol-6616	1/100	0.117846	0.117846	0	0	8.36532	17.8882	PRF1
carbarsone-4110	1/100	0.117846	0.117846	0	0	8.36532	17.8882	S100A4
naftidrofuryl-1267	1/100	0.117846	0.117846	0	0	8.36532	17.8882	NRGN
tacrolimus-378	1/100	0.117846	0.117846	0	0	8.36532	17.8882	G0S2
nifenazone-2285	1/100	0.117846	0.117846	0	0	8.36532	17.8882	CRIP1
Prestwick-685-3683	1/100	0.117846	0.117846	0	0	8.36532	17.8882	PRF1
fluvoxamine-4114	1/100	0.117846	0.117846	0	0	8.36532	17.8882	S100A9
trichostatin A-1891	1/100	0.117846	0.117846	0	0	8.36532	17.8882	IL6
cefalonium-4245	1/100	0.117846	0.117846	0	0	8.36532	17.8882	CCL2
hydralazine-4282	1/100	0.117846	0.117846	0	0	8.36532	17.8882	IL6
sotalol-7338	1/100	0.117846	0.117846	0	0	8.36532	17.8882	S100A4
sulindac-1857	1/100	0.117846	0.117846	0	0	8.36532	17.8882	CRIP1
CP-690334-01-3823	1/100	0.117846	0.117846	0	0	8.36532	17.8882	IL6
CP-690334-01-3826	1/100	0.117846	0.117846	0	0	8.36532	17.8882	IL6
letrozole-4240	1/100	0.117846	0.117846	0	0	8.36532	17.8882	CCL2
metacycline-2901	1/100	0.117846	0.117846	0	0	8.36532	17.8882	CCL2
hydrocortisone-6684	1/100	0.117846	0.117846	0	0	8.36532	17.8882	PRF1
proglumide-4337	1/100	0.117846	0.117846	0	0	8.36532	17.8882	NRGN
triamcinolone-1395	1/100	0.117846	0.117846	0	0	8.36532	17.8882	CCL2
fluvastatin-6691	1/100	0.117846	0.117846	0	0	8.36532	17.8882	BEX1
isoconazole-2218	1/100	0.117846	0.117846	0	0	8.36532	17.8882	S100A9
sulfanilamide-2709	1/100	0.117846	0.117846	0	0	8.36532	17.8882	PRF1
cisapride-6706	1/100	0.117846	0.117846	0	0	8.36532	17.8882	BEX1
sirolimus-5602	1/100	0.117846	0.117846	0	0	8.36532	17.8882	S100A9
2-aminobenzenesulfonamide-3400	1/100	0.117846	0.117846	0	0	8.36532	17.8882	CRIP1
metergoline-1606	1/100	0.117846	0.117846	0	0	8.36532	17.8882	CCL2
melatonin-5393	1/100	0.117846	0.117846	0	0	8.36532	17.8882	S100A9
esculin-5411	1/100	0.117846	0.117846	0	0	8.36532	17.8882	S100A4
geldanamycin-1653	1/100	0.117846	0.117846	0	0	8.36532	17.8882	ID1
oxetacaine-1484	1/100	0.117846	0.117846	0	0	8.36532	17.8882	NRGN
levcycloserine-3870	1/100	0.117846	0.117846	0	0	8.36532	17.8882	CRIP1
ethaverine-3037	1/100	0.117846	0.117846	0	0	8.36532	17.8882	CCL2
debrisoquine-3207	1/100	0.117846	0.117846	0	0	8.36532	17.8882	CRIP1
cefadroxil-4080	1/100	0.117846	0.117846	0	0	8.36532	17.8882	PRF1
etilefrine-4590	1/100	0.117846	0.117846	0	0	8.36532	17.8882	G0S2
AG-028671-6557	1/100	0.117846	0.117846	0	0	8.36532	17.8882	PRF1
trichostatin A-1284	1/100	0.117846	0.117846	0	0	8.36532	17.8882	CCL2
enalapril-7026	1/100	0.117846	0.117846	0	0	8.36532	17.8882	NRGN
myricetin-4090	1/100	0.117846	0.117846	0	0	8.36532	17.8882	S100A4
ketoprofen-3729	1/100	0.117846	0.117846	0	0	8.36532	17.8882	PRF1
SB-202190-6882	1/100	0.117846	0.117846	0	0	8.36532	17.8882	IL6
tanespimycin-5215	1/100	0.117846	0.117846	0	0	8.36532	17.8882	ID1
harpagoside-4981	1/100	0.117846	0.117846	0	0	8.36532	17.8882	NRGN
pheniramine-4130	1/100	0.117846	0.117846	0	0	8.36532	17.8882	S100A9
fulvestrant-310	1/100	0.117846	0.117846	0	0	8.36532	17.8882	FCGR3B
selegiline-4146	1/100	0.117846	0.117846	0	0	8.36532	17.8882	PRF1
CP-319743-7491	1/100	0.117846	0.117846	0	0	8.36532	17.8882	PRF1
alvespimycin-5210	1/100	0.117846	0.117846	0	0	8.36532	17.8882	ID1
buspirone-1282	1/100	0.117846	0.117846	0	0	8.36532	17.8882	NRGN
rofecoxib-463	1/100	0.117846	0.117846	0	0	8.36532	17.8882	CRIP1
kawain-4693	1/100	0.117846	0.117846	0	0	8.36532	17.8882	S100A9
bethanechol-3537	1/100	0.117846	0.117846	0	0	8.36532	17.8882	S100A4
meprylcaine-5723	1/100	0.117846	0.117846	0	0	8.36532	17.8882	BEX1
ribavirin-3142	1/100	0.117846	0.117846	0	0	8.36532	17.8882	CCL2
LM-1685-253	1/100	0.117846	0.117846	0	0	8.36532	17.8882	NRGN
sulfafurazole-5622	1/100	0.117846	0.117846	0	0	8.36532	17.8882	CRIP1
tolbutamide-2320	1/100	0.117846	0.117846	0	0	8.36532	17.8882	NRGN
carbinoxamine-6786	1/100	0.117846	0.117846	0	0	8.36532	17.8882	PRF1
7-aminocephalosporanic acid-4826	1/100	0.117846	0.117846	0	0	8.36532	17.8882	S100A4
aminoglutethimide-7421	1/100	0.117846	0.117846	0	0	8.36532	17.8882	NRGN
astemizole-2211	1/100	0.117846	0.117846	0	0	8.36532	17.8882	NRGN
felbinac-5700	1/100	0.117846	0.117846	0	0	8.36532	17.8882	S100A9
cefepime-5761	1/100	0.117846	0.117846	0	0	8.36532	17.8882	IL6
flecainide-3843	1/100	0.117846	0.117846	0	0	8.36532	17.8882	NRGN
fluphenazine-5880	1/100	0.117846	0.117846	0	0	8.36532	17.8882	S100A4
methyldopa-1619	1/100	0.117846	0.117846	0	0	8.36532	17.8882	BEX1
cytisine-1766	1/100	0.117846	0.117846	0	0	8.36532	17.8882	CRIP1
tonzonium bromide-5678	1/100	0.117846	0.117846	0	0	8.36532	17.8882	S100A9
cotinine-5611	1/100	0.117846	0.117846	0	0	8.36532	17.8882	S100A9
oxetacaine-1903	1/100	0.117846	0.117846	0	0	8.36532	17.8882	BEX1
trichostatin A-1400	1/100	0.117846	0.117846	0	0	8.36532	17.8882	CCL2
acetylsalicylic acid-4428	1/100	0.117846	0.117846	0	0	8.36532	17.8882	BEX1
citiolone-3930	1/100	0.117846	0.117846	0	0	8.36532	17.8882	CRIP1
IC-86621-7513	1/100	0.117846	0.117846	0	0	8.36532	17.8882	S100A9
dapsone-5498	1/100	0.117846	0.117846	0	0	8.36532	17.8882	PRF1
beclometasone-3001	1/100	0.117846	0.117846	0	0	8.36532	17.8882	CCL2
benzocaine-2822	1/100	0.117846	0.117846	0	0	8.36532	17.8882	FCN1
clebopride-6311	1/100	0.117846	0.117846	0	0	8.36532	17.8882	BEX1
finasteride-6062	1/100	0.117846	0.117846	0	0	8.36532	17.8882	S100A9
tanespimycin-6986	1/100	0.117846	0.117846	0	0	8.36532	17.8882	ID1
tribenoside-3507	1/100	0.117846	0.117846	0	0	8.36532	17.8882	S100A4
ethisterone-4340	1/100	0.117846	0.117846	0	0	8.36532	17.8882	PRF1
alvespimycin-1213	1/100	0.117846	0.117846	0	0	8.36532	17.8882	ID1
calycanthine-2764	1/100	0.117846	0.117846	0	0	8.36532	17.8882	NRGN
colforsin-7059	1/100	0.117846	0.117846	0	0	8.36532	17.8882	G0S2
bupropion-3180	1/100	0.117846	0.117846	0	0	8.36532	17.8882	S100A4
lynestrenol-5355	1/100	0.117846	0.117846	0	0	8.36532	17.8882	ID1
isoniazid-1399	1/100	0.117846	0.117846	0	0	8.36532	17.8882	NRGN
16-phenyltetranorprostaglandin E2-7546	1/100	0.117846	0.117846	0	0	8.36532	17.8882	CLEC3B
pheniramine-1910	1/100	0.117846	0.117846	0	0	8.36532	17.8882	BEX1
anisomycin-1304	1/100	0.117846	0.117846	0	0	8.36532	17.8882	CCL2
ellipticine-1765	1/100	0.117846	0.117846	0	0	8.36532	17.8882	CCL2
fluticasone-2928	1/100	0.117846	0.117846	0	0	8.36532	17.8882	CCL2
amodiaquine-5747	1/100	0.117846	0.117846	0	0	8.36532	17.8882	IL6
oxedrine-3578	1/100	0.117846	0.117846	0	0	8.36532	17.8882	S100A4
0175029-0000-4713	1/100	0.117846	0.117846	0	0	8.36532	17.8882	ID1
Prestwick-642-4419	1/100	0.117846	0.117846	0	0	8.36532	17.8882	CRIP1
metitepine-6312	1/100	0.117846	0.117846	0	0	8.36532	17.8882	S100A9
monorden-493	1/100	0.117846	0.117846	0	0	8.36532	17.8882	FCN1
Prestwick-665-3681	1/100	0.117846	0.117846	0	0	8.36532	17.8882	PRF1
netilmicin-3524	1/100	0.117846	0.117846	0	0	8.36532	17.8882	S100A4
fulvestrant-6197	1/100	0.117846	0.117846	0	0	8.36532	17.8882	ID1
raloxifene-376	1/100	0.117846	0.117846	0	0	8.36532	17.8882	IL6
trichostatin A-6193	1/100	0.117846	0.117846	0	0	8.36532	17.8882	CCL2
resveratrol-841	1/100	0.117846	0.117846	0	0	8.36532	17.8882	ID1
nicardipine-6297	1/100	0.117846	0.117846	0	0	8.36532	17.8882	BEX1
gliclazide-5514	1/100	0.117846	0.117846	0	0	8.36532	17.8882	NRGN
chlorambucil-3869	1/100	0.117846	0.117846	0	0	8.36532	17.8882	CRIP1
racecadotril-5755	1/100	0.117846	0.117846	0	0	8.36532	17.8882	PRF1
thalidomide-1411	1/100	0.117846	0.117846	0	0	8.36532	17.8882	NRGN
5253409-961	1/100	0.117846	0.117846	0	0	8.36532	17.8882	NRGN
zardaverine-4209	1/100	0.117846	0.117846	0	0	8.36532	17.8882	IL6
trichlormethiazide-2998	1/100	0.117846	0.117846	0	0	8.36532	17.8882	NRGN
trichostatin A-2694	1/100	0.117846	0.117846	0	0	8.36532	17.8882	CCL2
monorden-5216	1/100	0.117846	0.117846	0	0	8.36532	17.8882	S100A9
amodiaquine-1570	1/100	0.117846	0.117846	0	0	8.36532	17.8882	BEX1
dosulepin-7284	1/100	0.117846	0.117846	0	0	8.36532	17.8882	BEX1
PHA-00846566E-7081	1/100	0.117846	0.117846	0	0	8.36532	17.8882	S100A4
chlorprothixene-1272	1/100	0.117846	0.117846	0	0	8.36532	17.8882	NRGN
tanespimycin-5566	1/100	0.117846	0.117846	0	0	8.36532	17.8882	ID1
PHA-00745360-4559	1/100	0.117846	0.117846	0	0	8.36532	17.8882	S100A9
piperacillin-3845	1/100	0.117846	0.117846	0	0	8.36532	17.8882	S100A4
tanespimycin-4449	1/100	0.117846	0.117846	0	0	8.36532	17.8882	ID1
oxybutynin-6770	1/100	0.117846	0.117846	0	0	8.36532	17.8882	S100A4
guaifenesin-4371	1/100	0.117846	0.117846	0	0	8.36532	17.8882	PRF1
zimeldine-5670	1/100	0.117846	0.117846	0	0	8.36532	17.8882	CRIP1
berberine-2770	1/100	0.117846	0.117846	0	0	8.36532	17.8882	NRGN
levocabastine-7249	1/100	0.117846	0.117846	0	0	8.36532	17.8882	S100A9
copper sulfate-575	1/100	0.117846	0.117846	0	0	8.36532	17.8882	NRGN
enoxacin-5616	1/100	0.117846	0.117846	0	0	8.36532	17.8882	S100A9
SC-19220-7095	1/100	0.117846	0.117846	0	0	8.36532	17.8882	IL6
fulvestrant-2698	1/100	0.117846	0.117846	0	0	8.36532	17.8882	G0S2
sparteine-4391	1/100	0.117846	0.117846	0	0	8.36532	17.8882	CRIP1
LY-294002-1168	1/100	0.117846	0.117846	0	0	8.36532	17.8882	CCL2
finasteride-2206	1/100	0.117846	0.117846	0	0	8.36532	17.8882	NRGN
monensin-7402	1/100	0.117846	0.117846	0	0	8.36532	17.8882	ID1
mometasone-1746	1/100	0.117846	0.117846	0	0	8.36532	17.8882	CCL2
nalbuphine-1379	1/100	0.117846	0.117846	0	0	8.36532	17.8882	NRGN
ricinine-6067	1/100	0.117846	0.117846	0	0	8.36532	17.8882	CRIP1
valproic acid-1002	1/100	0.117846	0.117846	0	0	8.36532	17.8882	S100A4
tropicamide-2347	1/100	0.117846	0.117846	0	0	8.36532	17.8882	NKG7
furaltadone-2554	1/100	0.117846	0.117846	0	0	8.36532	17.8882	CRIP1
sulfaphenazole-1836	1/100	0.117846	0.117846	0	0	8.36532	17.8882	CRIP1
hymecromone-5684	1/100	0.117846	0.117846	0	0	8.36532	17.8882	CRIP1
triamterene-7307	1/100	0.117846	0.117846	0	0	8.36532	17.8882	BEX1
foliosidine-6057	1/100	0.117846	0.117846	0	0	8.36532	17.8882	S100A9
rosiglitazone-1658	1/100	0.117846	0.117846	0	0	8.36532	17.8882	S100A4
zomepirac-3454	1/100	0.117846	0.117846	0	0	8.36532	17.8882	S100A4
tretinoin-5208	1/100	0.117846	0.117846	0	0	8.36532	17.8882	S100A4
guanethidine-5731	1/100	0.117846	0.117846	0	0	8.36532	17.8882	IL6
moxisylyte-1682	1/100	0.117846	0.117846	0	0	8.36532	17.8882	S100A4
tetrahydroalstonine-2748	1/100	0.117846	0.117846	0	0	8.36532	17.8882	NRGN
salsolidin-4226	1/100	0.117846	0.117846	0	0	8.36532	17.8882	CCL2
valproic acid-5211	1/100	0.117846	0.117846	0	0	8.36532	17.8882	S100A9
clemizole-4695	1/100	0.117846	0.117846	0	0	8.36532	17.8882	S100A4
pentetrazol-2092	1/100	0.117846	0.117846	0	0	8.36532	17.8882	BEX1
etynodiol-5024	1/100	0.117846	0.117846	0	0	8.36532	17.8882	S100A4
fludroxycortide-2184	1/100	0.117846	0.117846	0	0	8.36532	17.8882	CCL2
2-aminobenzenesulfonamide-6321	1/100	0.117846	0.117846	0	0	8.36532	17.8882	IL6
LY-294002-2676	1/100	0.117846	0.117846	0	0	8.36532	17.8882	PRF1
buspirone-6743	1/100	0.117846	0.117846	0	0	8.36532	17.8882	BEX1
fluorometholone-2509	1/100	0.117846	0.117846	0	0	8.36532	17.8882	CCL2
nordihydroguaiaretic acid-6983	1/100	0.117846	0.117846	0	0	8.36532	17.8882	NRGN
pararosaniline-893	1/100	0.117846	0.117846	0	0	8.36532	17.8882	NRGN
oleandomycin-5676	1/100	0.117846	0.117846	0	0	8.36532	17.8882	S100A9
orciprenaline-4831	1/100	0.117846	0.117846	0	0	8.36532	17.8882	S100A9
ethosuximide-2280	1/100	0.117846	0.117846	0	0	8.36532	17.8882	CRIP1
dimethyloxalylglycine-584	1/100	0.117846	0.117846	0	0	8.36532	17.8882	G0S2
fenbendazole-2360	1/100	0.117846	0.117846	0	0	8.36532	17.8882	NRGN
altretamine-3090	1/100	0.117846	0.117846	0	0	8.36532	17.8882	PRF1
gemfibrozil-2277	1/100	0.117846	0.117846	0	0	8.36532	17.8882	NRGN
SR-95639A-4977	1/100	0.117846	0.117846	0	0	8.36532	17.8882	CRIP1
streptozocin-6098	1/100	0.117846	0.117846	0	0	8.36532	17.8882	S100A9
0317956-0000-3969	1/100	0.117846	0.117846	0	0	8.36532	17.8882	PRF1
bucladesine-5886	1/100	0.117846	0.117846	0	0	8.36532	17.8882	PRF1
0317956-0000-3966	1/100	0.117846	0.117846	0	0	8.36532	17.8882	CRIP1
chlorphenamine-2055	1/100	0.117846	0.117846	0	0	8.36532	17.8882	FABP4
rosiglitazone-2693	1/100	0.117846	0.117846	0	0	8.36532	17.8882	PRF1
trichostatin A-1421	1/100	0.117846	0.117846	0	0	8.36532	17.8882	CCL2
acetylsalicylic acid-2664	1/100	0.117846	0.117846	0	0	8.36532	17.8882	PRF1
resveratrol-622	1/100	0.117846	0.117846	0	0	8.36532	17.8882	ID1
epirizole-5995	1/100	0.117846	0.117846	0	0	8.36532	17.8882	S100A4
sulfamethoxypyridazine-4733	1/100	0.117846	0.117846	0	0	8.36532	17.8882	PRF1
tanespimycin-1643	1/100	0.117846	0.117846	0	0	8.36532	17.8882	ID1
tanespimycin-6966	1/100	0.117846	0.117846	0	0	8.36532	17.8882	ID1
sulfadiazine-1688	1/100	0.117846	0.117846	0	0	8.36532	17.8882	S100A4
harmine-1758	1/100	0.117846	0.117846	0	0	8.36532	17.8882	CRIP1
dicloxacillin-2445	1/100	0.117846	0.117846	0	0	8.36532	17.8882	CRIP1
papaverine-5769	1/100	0.117846	0.117846	0	0	8.36532	17.8882	BEX1
STOCK1N-28457-6906	1/100	0.117846	0.117846	0	0	8.36532	17.8882	ID1
phenazopyridine-6100	1/100	0.117846	0.117846	0	0	8.36532	17.8882	CRIP1
diethylstilbestrol-3895	1/100	0.117846	0.117846	0	0	8.36532	17.8882	CRIP1
bezafibrate-1275	1/100	0.117846	0.117846	0	0	8.36532	17.8882	NRGN
tretinoin-991	1/100	0.117846	0.117846	0	0	8.36532	17.8882	S100A4
prochlorperazine-1156	1/100	0.117846	0.117846	0	0	8.36532	17.8882	NRGN
dicloxacillin-3307	1/100	0.117846	0.117846	0	0	8.36532	17.8882	S100A4
vorinostat-1161	1/100	0.117846	0.117846	0	0	8.36532	17.8882	CCL2
clozapine-1009	1/100	0.117846	0.117846	0	0	8.36532	17.8882	NRGN
niflumic acid-7430	1/100	0.117846	0.117846	0	0	8.36532	17.8882	S100A4
clemizole-7371	1/100	0.117846	0.117846	0	0	8.36532	17.8882	CRIP1
LY-294002-461	1/100	0.117846	0.117846	0	0	8.36532	17.8882	G0S2
scopolamine N-oxide-1415	1/100	0.117846	0.117846	0	0	8.36532	17.8882	NRGN
droperidol-5690	1/100	0.117846	0.117846	0	0	8.36532	17.8882	S100A4
cloperastine-3408	1/100	0.117846	0.117846	0	0	8.36532	17.8882	NRGN
mianserin-2068	1/100	0.117846	0.117846	0	0	8.36532	17.8882	NRGN
15-delta prostaglandin J2-2691	1/100	0.117846	0.117846	0	0	8.36532	17.8882	CCL2
lobeline-6258	1/100	0.117846	0.117846	0	0	8.36532	17.8882	S100A4
genistein-268	1/100	0.117846	0.117846	0	0	8.36532	17.8882	G0S2
cyclic adenosine monophosphate-2969	1/100	0.117846	0.117846	0	0	8.36532	17.8882	CCL2
AG-013608-6400	1/100	0.117846	0.117846	0	0	8.36532	17.8882	FCN1
pergolide-7271	1/100	0.117846	0.117846	0	0	8.36532	17.8882	NRGN
nalidixic acid-4691	1/100	0.117846	0.117846	0	0	8.36532	17.8882	PRF1
norfloxacin-5985	1/100	0.117846	0.117846	0	0	8.36532	17.8882	S100A4
CP-690334-01-3909	1/100	0.117846	0.117846	0	0	8.36532	17.8882	CRIP1
clozapine-5589	1/100	0.117846	0.117846	0	0	8.36532	17.8882	PRF1
noretynodrel-1696	1/100	0.117846	0.117846	0	0	8.36532	17.8882	S100A4
sulfaquinoxaline-6090	1/100	0.117846	0.117846	0	0	8.36532	17.8882	CRIP1
amoxicillin-1265	1/100	0.117846	0.117846	0	0	8.36532	17.8882	NRGN
Gly-His-Lys-6560	1/100	0.117846	0.117846	0	0	8.36532	17.8882	BEX1
abamectin-5864	1/100	0.117846	0.117846	0	0	8.36532	17.8882	BEX1
Prestwick-860-5679	1/100	0.117846	0.117846	0	0	8.36532	17.8882	S100A9
flufenamic acid-2267	1/100	0.117846	0.117846	0	0	8.36532	17.8882	S100A9
quipazine-5887	1/100	0.117846	0.117846	0	0	8.36532	17.8882	IL6
proxymetacaine-6332	1/100	0.117846	0.117846	0	0	8.36532	17.8882	ID1
rolitetracycline-3369	1/100	0.117846	0.117846	0	0	8.36532	17.8882	CRIP1
rilmenidine-3133	1/100	0.117846	0.117846	0	0	8.36532	17.8882	CLEC3B
clomipramine-4487	1/100	0.117846	0.117846	0	0	8.36532	17.8882	BEX1
metampicillin-1440	1/100	0.117846	0.117846	0	0	8.36532	17.8882	BEX1
oxybenzone-6309	1/100	0.117846	0.117846	0	0	8.36532	17.8882	BEX1
wortmannin-7002	1/100	0.117846	0.117846	0	0	8.36532	17.8882	NRGN
acebutolol-6631	1/100	0.117846	0.117846	0	0	8.36532	17.8882	MNDA
meclofenamic acid-2291	1/100	0.117846	0.117846	0	0	8.36532	17.8882	S100A9
methylbenzethonium chloride-3850	1/100	0.117846	0.117846	0	0	8.36532	17.8882	S100A9
fluvoxamine-2913	1/100	0.117846	0.117846	0	0	8.36532	17.8882	CRIP1
trifluoperazine-2389	1/100	0.117846	0.117846	0	0	8.36532	17.8882	CCL2
lisuride-1545	1/100	0.117846	0.117846	0	0	8.36532	17.8882	S100A4
levocabastine-3509	1/100	0.117846	0.117846	0	0	8.36532	17.8882	S100A4
amphotericin B-6303	1/100	0.117846	0.117846	0	0	8.36532	17.8882	CRIP1
ergocalciferol-6746	1/100	0.117846	0.117846	0	0	8.36532	17.8882	IL6
tyloxapol-5672	1/100	0.117846	0.117846	0	0	8.36532	17.8882	S100A9
denatonium benzoate-5061	1/100	0.117846	0.117846	0	0	8.36532	17.8882	IL6
monobenzone-6713	1/100	0.117846	0.117846	0	0	8.36532	17.8882	FABP4
LY-294002-5599	1/100	0.117846	0.117846	0	0	8.36532	17.8882	S100A9
tanespimycin-432	1/100	0.117846	0.117846	0	0	8.36532	17.8882	ID1
tremorine-1579	1/100	0.117846	0.117846	0	0	8.36532	17.8882	CCL2
thioridazine-1010	1/100	0.117846	0.117846	0	0	8.36532	17.8882	NRGN
ranitidine-6324	1/100	0.117846	0.117846	0	0	8.36532	17.8882	S100A4
syrosingopine-1761	1/100	0.117846	0.117846	0	0	8.36532	17.8882	MNDA
orciprenaline-4248	1/100	0.117846	0.117846	0	0	8.36532	17.8882	CCL2
denatonium benzoate-3123	1/100	0.117846	0.117846	0	0	8.36532	17.8882	CRIP1
ampicillin-6307	1/100	0.117846	0.117846	0	0	8.36532	17.8882	BEX1
naproxen-5457	1/100	0.117846	0.117846	0	0	8.36532	17.8882	S100A9
LY-294002-2696	1/100	0.117846	0.117846	0	0	8.36532	17.8882	CCL2
Prestwick-983-3141	1/100	0.117846	0.117846	0	0	8.36532	17.8882	CCL2
sanguinarine-2927	1/100	0.117846	0.117846	0	0	8.36532	17.8882	CCL2
amrinone-6826	1/100	0.117846	0.117846	0	0	8.36532	17.8882	CRIP1
primidone-3402	1/100	0.117846	0.117846	0	0	8.36532	17.8882	CRIP1
carteolol-3276	1/100	0.117846	0.117846	0	0	8.36532	17.8882	PRF1
tanespimycin-916	1/100	0.117846	0.117846	0	0	8.36532	17.8882	ID1
quinpirole-2977	1/100	0.117846	0.117846	0	0	8.36532	17.8882	CCL2
luteolin-3379	1/100	0.117846	0.117846	0	0	8.36532	17.8882	ID1
pioglitazone-7506	1/100	0.117846	0.117846	0	0	8.36532	17.8882	S100A9
ketotifen-7199	1/100	0.117846	0.117846	0	0	8.36532	17.8882	NRGN
levamisole-2257	1/100	0.117846	0.117846	0	0	8.36532	17.8882	S100A9
sertaconazole-6128	1/100	0.117846	0.117846	0	0	8.36532	17.8882	PRF1
azaperone-3573	1/100	0.117846	0.117846	0	0	8.36532	17.8882	S100A4
buspirone-5343	1/100	0.117846	0.117846	0	0	8.36532	17.8882	NRGN
repaglinide-7216	1/100	0.117846	0.117846	0	0	8.36532	17.8882	S100A4
etodolac-7246	1/100	0.117846	0.117846	0	0	8.36532	17.8882	FABP4
noscapine-5851	1/100	0.117846	0.117846	0	0	8.36532	17.8882	IL6
2,6-dimethylpiperidine-6049	1/100	0.117846	0.117846	0	0	8.36532	17.8882	NRGN
valproic acid-1639	1/100	0.117846	0.117846	0	0	8.36532	17.8882	S100A4
azaperone-5877	1/100	0.117846	0.117846	0	0	8.36532	17.8882	IL6
cyclizine-2880	1/100	0.117846	0.117846	0	0	8.36532	17.8882	NRGN
fusaric acid-4105	1/100	0.117846	0.117846	0	0	8.36532	17.8882	S100A4
tanespimycin-986	1/100	0.117846	0.117846	0	0	8.36532	17.8882	ID1
levonorgestrel-3606	1/100	0.117846	0.117846	0	0	8.36532	17.8882	S100A9
testosterone-5271	1/100	0.117846	0.117846	0	0	8.36532	17.8882	S100A9
PF-01378883-00-6363	1/100	0.117846	0.117846	0	0	8.36532	17.8882	S100A9
hydralazine-2349	1/100	0.117846	0.117846	0	0	8.36532	17.8882	NRGN
hesperidin-6714	1/100	0.117846	0.117846	0	0	8.36532	17.8882	ID1
tanespimycin-6943	1/100	0.117846	0.117846	0	0	8.36532	17.8882	ID1
sulfamonomethoxine-7200	1/100	0.117846	0.117846	0	0	8.36532	17.8882	NRGN
pentolonium-3676	1/100	0.117846	0.117846	0	0	8.36532	17.8882	PRF1
piperacillin-4320	1/100	0.117846	0.117846	0	0	8.36532	17.8882	PRF1
hexamethonium bromide-6620	1/100	0.117846	0.117846	0	0	8.36532	17.8882	PRF1
ciclosporin-4586	1/100	0.117846	0.117846	0	0	8.36532	17.8882	BEX1
indometacin-2377	1/100	0.117846	0.117846	0	0	8.36532	17.8882	NRGN
famotidine-1529	1/100	0.117846	0.117846	0	0	8.36532	17.8882	S100A4
cefalexin-2628	1/100	0.117846	0.117846	0	0	8.36532	17.8882	S100A4
lysergol-6621	1/100	0.117846	0.117846	0	0	8.36532	17.8882	PRF1
estradiol-782	1/100	0.117846	0.117846	0	0	8.36532	17.8882	S100A9
morantel-1840	1/100	0.117846	0.117846	0	0	8.36532	17.8882	CRIP1
propylthiouracil-2476	1/100	0.117846	0.117846	0	0	8.36532	17.8882	G0S2
cefoperazone-1627	1/100	0.117846	0.117846	0	0	8.36532	17.8882	BEX1
pimozide-7132	1/100	0.117846	0.117846	0	0	8.36532	17.8882	CRIP1
nefopam-4752	1/100	0.117846	0.117846	0	0	8.36532	17.8882	ID1
clomifene-1269	1/100	0.117846	0.117846	0	0	8.36532	17.8882	NRGN
torasemide-3517	1/100	0.117846	0.117846	0	0	8.36532	17.8882	NRGN
amrinone-2724	1/100	0.117846	0.117846	0	0	8.36532	17.8882	NRGN
propidium iodide-2541	1/100	0.117846	0.117846	0	0	8.36532	17.8882	FCGR3B
AR-A014418-7092	1/100	0.117846	0.117846	0	0	8.36532	17.8882	GPRC5A
estradiol-7000	1/100	0.117846	0.117846	0	0	8.36532	17.8882	ID1
ramifenazone-6097	1/100	0.117846	0.117846	0	0	8.36532	17.8882	CRIP1
sulfathiazole-1463	1/100	0.117846	0.117846	0	0	8.36532	17.8882	NRGN
streptomycin-3195	1/100	0.117846	0.117846	0	0	8.36532	17.8882	S100A4
lomustine-7050	1/100	0.117846	0.117846	0	0	8.36532	17.8882	G0S2
prednisolone-5101	1/100	0.117846	0.117846	0	0	8.36532	17.8882	BEX1
ketoprofen-4751	1/100	0.117846	0.117846	0	0	8.36532	17.8882	S100A9
maprotiline-5022	1/100	0.117846	0.117846	0	0	8.36532	17.8882	PRF1
lysergol-4966	1/100	0.117846	0.117846	0	0	8.36532	17.8882	NRGN
terfenadine-6823	1/100	0.117846	0.117846	0	0	8.36532	17.8882	S100A9
primidone-6723	1/100	0.117846	0.117846	0	0	8.36532	17.8882	ID1
staurosporine-423	1/100	0.117846	0.117846	0	0	8.36532	17.8882	ID1
mifepristone-1569	1/100	0.117846	0.117846	0	0	8.36532	17.8882	CCL2
monorden-1057	1/100	0.117846	0.117846	0	0	8.36532	17.8882	ID1
estrone-4993	1/100	0.117846	0.117846	0	0	8.36532	17.8882	ID1
Prestwick-1103-7317	1/100	0.117846	0.117846	0	0	8.36532	17.8882	BEX1
isoconazole-7211	1/100	0.117846	0.117846	0	0	8.36532	17.8882	NRGN
Prestwick-967-4250	1/100	0.117846	0.117846	0	0	8.36532	17.8882	CCL2
chloropyramine-4414	1/100	0.117846	0.117846	0	0	8.36532	17.8882	CRIP1
phthalylsulfathiazole-5249	1/100	0.117846	0.117846	0	0	8.36532	17.8882	S100A9
alpha-estradiol-403	1/100	0.117846	0.117846	0	0	8.36532	17.8882	NRGN
methoxamine-6627	1/100	0.117846	0.117846	0	0	8.36532	17.8882	MNDA
(-)-isoprenaline-6149	1/100	0.117846	0.117846	0	0	8.36532	17.8882	CCL2
clemizole-2301	1/100	0.117846	0.117846	0	0	8.36532	17.8882	PRF1
phenazone-1989	1/100	0.117846	0.117846	0	0	8.36532	17.8882	CCL2
fenbufen-4743	1/100	0.117846	0.117846	0	0	8.36532	17.8882	S100A9
meprylcaine-3544	1/100	0.117846	0.117846	0	0	8.36532	17.8882	S100A4
molsidomine-5426	1/100	0.117846	0.117846	0	0	8.36532	17.8882	S100A9
0317956-0000-3858	1/100	0.117846	0.117846	0	0	8.36532	17.8882	S100A9
quipazine-1789	1/100	0.117846	0.117846	0	0	8.36532	17.8882	NRGN
troglitazone-1657	1/100	0.117846	0.117846	0	0	8.36532	17.8882	S100A4
azathioprine-1945	1/100	0.117846	0.117846	0	0	8.36532	17.8882	NRGN
kanamycin-1609	1/100	0.117846	0.117846	0	0	8.36532	17.8882	NRGN
monorden-2679	1/100	0.117846	0.117846	0	0	8.36532	17.8882	PRF1
pioglitazone-5925	1/100	0.117846	0.117846	0	0	8.36532	17.8882	SCGB1A1
propafenone-6336	1/100	0.117846	0.117846	0	0	8.36532	17.8882	ID1
PF-00562151-00-5922	1/100	0.117846	0.117846	0	0	8.36532	17.8882	PRF1
tanespimycin-1056	1/100	0.117846	0.117846	0	0	8.36532	17.8882	ID1
niflumic acid-2399	1/100	0.117846	0.117846	0	0	8.36532	17.8882	CCL2
pivampicillin-3506	1/100	0.117846	0.117846	0	0	8.36532	17.8882	NRGN
piperine-4830	1/100	0.117846	0.117846	0	0	8.36532	17.8882	ID1
promethazine-6717	1/100	0.117846	0.117846	0	0	8.36532	17.8882	ID1
chlorphenesin-2115	1/100	0.117846	0.117846	0	0	8.36532	17.8882	PPBP
thiostrepton-4385	1/100	0.117846	0.117846	0	0	8.36532	17.8882	CRIP1
ciclopirox-2456	1/100	0.117846	0.117846	0	0	8.36532	17.8882	NRGN
tribenoside-5429	1/100	0.117846	0.117846	0	0	8.36532	17.8882	S100A9
fluoxetine-5356	1/100	0.117846	0.117846	0	0	8.36532	17.8882	ID1
tanespimycin-5586	1/100	0.117846	0.117846	0	0	8.36532	17.8882	ID1
tanespimycin-5585	1/100	0.117846	0.117846	0	0	8.36532	17.8882	ID1
propidium iodide-6104	1/100	0.117846	0.117846	0	0	8.36532	17.8882	CRIP1
hydralazine-3621	1/100	0.117846	0.117846	0	0	8.36532	17.8882	CRIP1
doxorubicin-5671	1/100	0.117846	0.117846	0	0	8.36532	17.8882	ID1
boldine-4004	1/100	0.117846	0.117846	0	0	8.36532	17.8882	S100A4
H-7-5941	1/100	0.117846	0.117846	0	0	8.36532	17.8882	ID1
atractyloside-4717	1/100	0.117846	0.117846	0	0	8.36532	17.8882	S100A9
capsaicin-3372	1/100	0.117846	0.117846	0	0	8.36532	17.8882	S100A9
Prestwick-665-4704	1/100	0.117846	0.117846	0	0	8.36532	17.8882	S100A9
myosmine-4293	1/100	0.117846	0.117846	0	0	8.36532	17.8882	IL6
ethaverine-6737	1/100	0.117846	0.117846	0	0	8.36532	17.8882	IL6
geldanamycin-972	1/100	0.117846	0.117846	0	0	8.36532	17.8882	ID1
oxetacaine-4829	1/100	0.117846	0.117846	0	0	8.36532	17.8882	ID1
idoxuridine-4200	1/100	0.117846	0.117846	0	0	8.36532	17.8882	NRGN
butyl hydroxybenzoate-5608	1/100	0.117846	0.117846	0	0	8.36532	17.8882	PRF1
geldanamycin-5225	1/100	0.117846	0.117846	0	0	8.36532	17.8882	ID1
zidovudine-6733	1/100	0.117846	0.117846	0	0	8.36532	17.8882	PRF1
Prestwick-1080-3796	1/100	0.117846	0.117846	0	0	8.36532	17.8882	PRF1
oxybutynin-1551	1/100	0.117846	0.117846	0	0	8.36532	17.8882	CCL2
securinine-2729	1/100	0.117846	0.117846	0	0	8.36532	17.8882	NRGN
sulfaphenazole-1794	1/100	0.117846	0.117846	0	0	8.36532	17.8882	PPBP
securinine-6831	1/100	0.117846	0.117846	0	0	8.36532	17.8882	CRIP1
tanespimycin-6926	1/100	0.117846	0.117846	0	0	8.36532	17.8882	ID1
imatinib-366	1/100	0.117846	0.117846	0	0	8.36532	17.8882	G0S2
clofilium tosylate-6830	1/100	0.117846	0.117846	0	0	8.36532	17.8882	PRF1
etodolac-7006	1/100	0.117846	0.117846	0	0	8.36532	17.8882	S100A4
rimexolone-2955	1/100	0.117846	0.117846	0	0	8.36532	17.8882	CCL2
pargyline-2102	1/100	0.117846	0.117846	0	0	8.36532	17.8882	PPBP
5186324-900	1/100	0.117846	0.117846	0	0	8.36532	17.8882	CRIP1
5279552-960	1/100	0.117846	0.117846	0	0	8.36532	17.8882	NRGN
ouabain-1302	1/100	0.117846	0.117846	0	0	8.36532	17.8882	CCL2
nadide-5873	1/100	0.117846	0.117846	0	0	8.36532	17.8882	NRGN
leflunomide-7238	1/100	0.117846	0.117846	0	0	8.36532	17.8882	S100A4
nomegestrol-6525	1/100	0.117846	0.117846	0	0	8.36532	17.8882	S100A9
zuclopenthixol-4843	1/100	0.117846	0.117846	0	0	8.36532	17.8882	S100A9
anabasine-6774	1/100	0.117846	0.117846	0	0	8.36532	17.8882	S100A4
oxymetazoline-2278	1/100	0.117846	0.117846	0	0	8.36532	17.8882	CRIP1
dilazep-2333	1/100	0.117846	0.117846	0	0	8.36532	17.8882	NRGN
topiramate-915	1/100	0.117846	0.117846	0	0	8.36532	17.8882	CRIP1
trichostatin A-5017	1/100	0.117846	0.117846	0	0	8.36532	17.8882	ID1
fluphenazine-1178	1/100	0.117846	0.117846	0	0	8.36532	17.8882	CRIP1
diphenylpyraline-4765	1/100	0.117846	0.117846	0	0	8.36532	17.8882	S100A9
gemfibrozil-5069	1/100	0.117846	0.117846	0	0	8.36532	17.8882	BEX1
hesperetin-1531	1/100	0.117846	0.117846	0	0	8.36532	17.8882	NRGN
griseofulvin-2332	1/100	0.117846	0.117846	0	0	8.36532	17.8882	CCL2
gramine-4118	1/100	0.117846	0.117846	0	0	8.36532	17.8882	S100A4
trichostatin A-6171	1/100	0.117846	0.117846	0	0	8.36532	17.8882	ID1
tetrahydroalstonine-1756	1/100	0.117846	0.117846	0	0	8.36532	17.8882	NRGN
brinzolamide-5016	1/100	0.117846	0.117846	0	0	8.36532	17.8882	PRF1
tetrandrine-6082	1/100	0.117846	0.117846	0	0	8.36532	17.8882	CRIP1
mevalolactone-5738	1/100	0.117846	0.117846	0	0	8.36532	17.8882	IL6
flurbiprofen-5634	1/100	0.117846	0.117846	0	0	8.36532	17.8882	CRIP1
sulfadoxine-7205	1/100	0.117846	0.117846	0	0	8.36532	17.8882	S100A4
indapamide-3859	1/100	0.117846	0.117846	0	0	8.36532	17.8882	NRGN
suramin sodium-7524	1/100	0.117846	0.117846	0	0	8.36532	17.8882	S100A4
suramin sodium-7529	1/100	0.117846	0.117846	0	0	8.36532	17.8882	BEX1
benfotiamine-3931	1/100	0.117846	0.117846	0	0	8.36532	17.8882	NRGN
aciclovir-4683	1/100	0.117846	0.117846	0	0	8.36532	17.8882	PRF1
tinidazole-4370	1/100	0.117846	0.117846	0	0	8.36532	17.8882	CRIP1
STOCK1N-35215-6427	1/100	0.117846	0.117846	0	0	8.36532	17.8882	CRIP1
alverine-1426	1/100	0.117846	0.117846	0	0	8.36532	17.8882	BEX1
cloperastine-4732	1/100	0.117846	0.117846	0	0	8.36532	17.8882	S100A9
chlorpropamide-5391	1/100	0.117846	0.117846	0	0	8.36532	17.8882	CRIP1
PHA-00851261E-3968	1/100	0.117846	0.117846	0	0	8.36532	17.8882	PRF1
zoxazolamine-2625	1/100	0.117846	0.117846	0	0	8.36532	17.8882	S100A4
etiocholanolone-3742	1/100	0.117846	0.117846	0	0	8.36532	17.8882	PRF1
prochlorperazine-995	1/100	0.117846	0.117846	0	0	8.36532	17.8882	NRGN
fluspirilene-5008	1/100	0.117846	0.117846	0	0	8.36532	17.8882	NRGN
betazole-5445	1/100	0.117846	0.117846	0	0	8.36532	17.8882	S100A9
sitosterol-2912	1/100	0.117846	0.117846	0	0	8.36532	17.8882	CRIP1
glycocholic acid-6716	1/100	0.117846	0.117846	0	0	8.36532	17.8882	FABP4
sulfamonomethoxine-3484	1/100	0.117846	0.117846	0	0	8.36532	17.8882	S100A4
LY-294002-5970	1/100	0.117846	0.117846	0	0	8.36532	17.8882	BEX1
pentoxyverine-2623	1/100	0.117846	0.117846	0	0	8.36532	17.8882	S100A4
alfuzosin-4644	1/100	0.117846	0.117846	0	0	8.36532	17.8882	IL6
fenspiride-6001	1/100	0.117846	0.117846	0	0	8.36532	17.8882	CRIP1
mevalolactone-2718	1/100	0.117846	0.117846	0	0	8.36532	17.8882	CRIP1
estradiol-5568	1/100	0.117846	0.117846	0	0	8.36532	17.8882	S100A9
oxybuprocaine-4115	1/100	0.117846	0.117846	0	0	8.36532	17.8882	S100A9
ketorolac-6489	1/100	0.117846	0.117846	0	0	8.36532	17.8882	ID1
ethionamide-4418	1/100	0.117846	0.117846	0	0	8.36532	17.8882	CRIP1
oxaprozin-971	1/100	0.117846	0.117846	0	0	8.36532	17.8882	NRGN
flurbiprofen-3095	1/100	0.117846	0.117846	0	0	8.36532	17.8882	CLEC3B
haloperidol-1024	1/100	0.117846	0.117846	0	0	8.36532	17.8882	NRGN
15-delta prostaglandin J2-1172	1/100	0.117846	0.117846	0	0	8.36532	17.8882	CCL2
cimetidine-4144	1/100	0.117846	0.117846	0	0	8.36532	17.8882	S100A9
sertaconazole-6811	1/100	0.117846	0.117846	0	0	8.36532	17.8882	CRIP1
H-7-5963	1/100	0.117846	0.117846	0	0	8.36532	17.8882	ID1
fludrocortisone-4342	1/100	0.117846	0.117846	0	0	8.36532	17.8882	BEX1
tanespimycin-5203	1/100	0.117846	0.117846	0	0	8.36532	17.8882	ID1
clindamycin-2057	1/100	0.117846	0.117846	0	0	8.36532	17.8882	PPBP
haloperidol-7003	1/100	0.117846	0.117846	0	0	8.36532	17.8882	NRGN
quinethazone-3793	1/100	0.117846	0.117846	0	0	8.36532	17.8882	PRF1
BCB000040-7554	1/100	0.117846	0.117846	0	0	8.36532	17.8882	PRF1
trifluoperazine-421	1/100	0.117846	0.117846	0	0	8.36532	17.8882	NRGN
piribedil-5434	1/100	0.117846	0.117846	0	0	8.36532	17.8882	S100A9
papaverine-1755	1/100	0.117846	0.117846	0	0	8.36532	17.8882	CCL2
azacitidine-4010	1/100	0.117846	0.117846	0	0	8.36532	17.8882	ID1
cromoglicic acid-3475	1/100	0.117846	0.117846	0	0	8.36532	17.8882	NRGN
dilazep-7364	1/100	0.117846	0.117846	0	0	8.36532	17.8882	IL6
isoetarine-5812	1/100	0.117846	0.117846	0	0	8.36532	17.8882	G0S2
arecoline-6322	1/100	0.117846	0.117846	0	0	8.36532	17.8882	IL6
astemizole-1365	1/100	0.117846	0.117846	0	0	8.36532	17.8882	S100A9
epiandrosterone-5687	1/100	0.117846	0.117846	0	0	8.36532	17.8882	S100A9
carbimazole-2437	1/100	0.117846	0.117846	0	0	8.36532	17.8882	PRF1
lycorine-3808	1/100	0.117846	0.117846	0	0	8.36532	17.8882	ID1
nitrofurantoin-7373	1/100	0.117846	0.117846	0	0	8.36532	17.8882	S100A9
retrorsine-6601	1/100	0.117846	0.117846	0	0	8.36532	17.8882	ID1
abamectin-2519	1/100	0.117846	0.117846	0	0	8.36532	17.8882	FCGR3B
corynanthine-4811	1/100	0.117846	0.117846	0	0	8.36532	17.8882	S100A4
econazole-6008	1/100	0.117846	0.117846	0	0	8.36532	17.8882	CRIP1
apramycin-6614	1/100	0.117846	0.117846	0	0	8.36532	17.8882	FABP4
etiocholanolone-3639	1/100	0.117846	0.117846	0	0	8.36532	17.8882	FCN1
heliotrine-6035	1/100	0.117846	0.117846	0	0	8.36532	17.8882	PRF1
etynodiol-3102	1/100	0.117846	0.117846	0	0	8.36532	17.8882	CCL2
fenoprofen-2553	1/100	0.117846	0.117846	0	0	8.36532	17.8882	NRGN
edrophonium chloride-1519	1/100	0.117846	0.117846	0	0	8.36532	17.8882	S100A4
pyrvinium-6339	1/100	0.117846	0.117846	0	0	8.36532	17.8882	S100A9
ciprofloxacin-1522	1/100	0.117846	0.117846	0	0	8.36532	17.8882	NRGN
benfotiamine-3837	1/100	0.117846	0.117846	0	0	8.36532	17.8882	S100A9
dimenhydrinate-2400	1/100	0.117846	0.117846	0	0	8.36532	17.8882	NRGN
alprostadil-2938	1/100	0.117846	0.117846	0	0	8.36532	17.8882	CCL2
chrysin-5505	1/100	0.117846	0.117846	0	0	8.36532	17.8882	ID1
gentamicin-7237	1/100	0.117846	0.117846	0	0	8.36532	17.8882	S100A4
fludroxycortide-6039	1/100	0.117846	0.117846	0	0	8.36532	17.8882	PRF1
trichostatin A-1835	1/100	0.117846	0.117846	0	0	8.36532	17.8882	CCL2
xylometazoline-7020	1/100	0.117846	0.117846	0	0	8.36532	17.8882	NRGN
dexpanthenol-1680	1/100	0.117846	0.117846	0	0	8.36532	17.8882	NRGN
arcaine-4974	1/100	0.117846	0.117846	0	0	8.36532	17.8882	CRIP1
tretinoin-1211	1/100	0.117846	0.117846	0	0	8.36532	17.8882	PPBP
tiratricol-7011	1/100	0.117846	0.117846	0	0	8.36532	17.8882	S100A4
sulfamethoxazole-4690	1/100	0.117846	0.117846	0	0	8.36532	17.8882	PRF1
15(S)-15-methylprostaglandin E2-7494	1/100	0.117846	0.117846	0	0	8.36532	17.8882	PRF1
LY-294002-6976	1/100	0.117846	0.117846	0	0	8.36532	17.8882	S100A4
lycorine-2195	1/100	0.117846	0.117846	0	0	8.36532	17.8882	CCL2
metrizamide-3255	1/100	0.117846	0.117846	0	0	8.36532	17.8882	NRGN
LY-294002-996	1/100	0.117846	0.117846	0	0	8.36532	17.8882	NRGN
piromidic acid-2996	1/100	0.117846	0.117846	0	0	8.36532	17.8882	CRIP1
halofantrine-7469	1/100	0.117846	0.117846	0	0	8.36532	17.8882	NRGN
liothyronine-4947	1/100	0.117846	0.117846	0	0	8.36532	17.8882	NRGN
LY-294002-361	1/100	0.117846	0.117846	0	0	8.36532	17.8882	CCL2
Prestwick-1084-3546	1/100	0.117846	0.117846	0	0	8.36532	17.8882	S100A4
altizide-4491	1/100	0.117846	0.117846	0	0	8.36532	17.8882	IL6
tanespimycin-4450	1/100	0.117846	0.117846	0	0	8.36532	17.8882	ID1
geldanamycin-593	1/100	0.117846	0.117846	0	0	8.36532	17.8882	ID1
lorglumide-5254	1/100	0.117846	0.117846	0	0	8.36532	17.8882	ID1
homatropine-1806	1/100	0.117846	0.117846	0	0	8.36532	17.8882	PPBP
hesperetin-6750	1/100	0.117846	0.117846	0	0	8.36532	17.8882	PRF1
monorden-999	1/100	0.117846	0.117846	0	0	8.36532	17.8882	ID1
theophylline-4812	1/100	0.117846	0.117846	0	0	8.36532	17.8882	CRIP1
palmatine-4957	1/100	0.117846	0.117846	0	0	8.36532	17.8882	NRGN
doxazosin-3363	1/100	0.117846	0.117846	0	0	8.36532	17.8882	S100A9
tanespimycin-5223	1/100	0.117846	0.117846	0	0	8.36532	17.8882	ID1
tanespimycin-5222	1/100	0.117846	0.117846	0	0	8.36532	17.8882	ID1
LY-294002-501	1/100	0.117846	0.117846	0	0	8.36532	17.8882	G0S2
phenoxybenzamine-4652	1/100	0.117846	0.117846	0	0	8.36532	17.8882	ID1
2,6-dimethylpiperidine-4363	1/100	0.117846	0.117846	0	0	8.36532	17.8882	S100A9
tropicamide-4744	1/100	0.117846	0.117846	0	0	8.36532	17.8882	S100A9
isradipine-5447	1/100	0.117846	0.117846	0	0	8.36532	17.8882	S100A9
sulfaguanidine-1995	1/100	0.117846	0.117846	0	0	8.36532	17.8882	CCL2
bromopride-3617	1/100	0.117846	0.117846	0	0	8.36532	17.8882	CRIP1
corbadrine-3450	1/100	0.117846	0.117846	0	0	8.36532	17.8882	NRGN
norcyclobenzaprine-4776	1/100	0.117846	0.117846	0	0	8.36532	17.8882	ID1
cyclopenthiazide-7325	1/100	0.117846	0.117846	0	0	8.36532	17.8882	S100A4
meticrane-1792	1/100	0.117846	0.117846	0	0	8.36532	17.8882	S100A4
benzbromarone-5015	1/100	0.117846	0.117846	0	0	8.36532	17.8882	S100A4
pramocaine-3894	1/100	0.117846	0.117846	0	0	8.36532	17.8882	CRIP1
flumetasone-2551	1/100	0.117846	0.117846	0	0	8.36532	17.8882	CCL2
tetryzoline-6069	1/100	0.117846	0.117846	0	0	8.36532	17.8882	PRF1
felodipine-6695	1/100	0.117846	0.117846	0	0	8.36532	17.8882	BEX1
naloxone-5606	1/100	0.117846	0.117846	0	0	8.36532	17.8882	CRIP1
josamycin-5692	1/100	0.117846	0.117846	0	0	8.36532	17.8882	CRIP1
amoxapine-1513	1/100	0.117846	0.117846	0	0	8.36532	17.8882	S100A4
aminohippuric acid-6453	1/100	0.117846	0.117846	0	0	8.36532	17.8882	CRIP1
betamethasone-1590	1/100	0.117846	0.117846	0	0	8.36532	17.8882	CCL2
haloperidol-6923	1/100	0.117846	0.117846	0	0	8.36532	17.8882	NRGN
methylbenzethonium chloride-4325	1/100	0.117846	0.117846	0	0	8.36532	17.8882	BEX1
lanatoside C-4328	1/100	0.117846	0.117846	0	0	8.36532	17.8882	G0S2
valinomycin-5906	1/100	0.117846	0.117846	0	0	8.36532	17.8882	CRIP1
carteolol-4176	1/100	0.117846	0.117846	0	0	8.36532	17.8882	CRIP1
megestrol-5013	1/100	0.117846	0.117846	0	0	8.36532	17.8882	S100A9
fluoxetine-2453	1/100	0.117846	0.117846	0	0	8.36532	17.8882	PRF1
benzamil-2200	1/100	0.117846	0.117846	0	0	8.36532	17.8882	CRIP1
parthenolide-1736	1/100	0.117846	0.117846	0	0	8.36532	17.8882	CCL2
cetirizine-4815	1/100	0.117846	0.117846	0	0	8.36532	17.8882	S100A4
roxithromycin-4192	1/100	0.117846	0.117846	0	0	8.36532	17.8882	PRF1
simvastatin-3002	1/100	0.117846	0.117846	0	0	8.36532	17.8882	CCL2
piperidolate-6129	1/100	0.117846	0.117846	0	0	8.36532	17.8882	CRIP1
terbutaline-5764	1/100	0.117846	0.117846	0	0	8.36532	17.8882	G0S2
bergenin-3467	1/100	0.117846	0.117846	0	0	8.36532	17.8882	NRGN
fasudil-343	1/100	0.117846	0.117846	0	0	8.36532	17.8882	S100A9
famprofazone-3834	1/100	0.117846	0.117846	0	0	8.36532	17.8882	S100A9
nialamide-4347	1/100	0.117846	0.117846	0	0	8.36532	17.8882	S100A9
nitrofural-6721	1/100	0.117846	0.117846	0	0	8.36532	17.8882	ID1
fluspirilene-3086	1/100	0.117846	0.117846	0	0	8.36532	17.8882	CRIP1
phenelzine-3884	1/100	0.117846	0.117846	0	0	8.36532	17.8882	NRGN
dorzolamide-6259	1/100	0.117846	0.117846	0	0	8.36532	17.8882	NRGN
pentolonium-2305	1/100	0.117846	0.117846	0	0	8.36532	17.8882	PRF1
AG-013608-6435	1/100	0.117846	0.117846	0	0	8.36532	17.8882	S100A4
seneciphylline-4238	1/100	0.117846	0.117846	0	0	8.36532	17.8882	CCL2
epivincamine-6838	1/100	0.117846	0.117846	0	0	8.36532	17.8882	CRIP1
amikacin-3233	1/100	0.117846	0.117846	0	0	8.36532	17.8882	CRIP1
pyrantel-5088	1/100	0.117846	0.117846	0	0	8.36532	17.8882	BEX1
asiaticoside-2943	1/100	0.117846	0.117846	0	0	8.36532	17.8882	NRGN
lisuride-5028	1/100	0.117846	0.117846	0	0	8.36532	17.8882	S100A9
daunorubicin-4983	1/100	0.117846	0.117846	0	0	8.36532	17.8882	ID1
sirolimus-1183	1/100	0.117846	0.117846	0	0	8.36532	17.8882	CRIP1
AH-6809-7075	1/100	0.117846	0.117846	0	0	8.36532	17.8882	FABP4
eticlopride-5695	1/100	0.117846	0.117846	0	0	8.36532	17.8882	S100A4
morantel-7010	1/100	0.117846	0.117846	0	0	8.36532	17.8882	NRGN
tanespimycin-1063	1/100	0.117846	0.117846	0	0	8.36532	17.8882	ID1
tanespimycin-1064	1/100	0.117846	0.117846	0	0	8.36532	17.8882	ID1
dioxybenzone-5699	1/100	0.117846	0.117846	0	0	8.36532	17.8882	S100A9
doxylamine-4235	1/100	0.117846	0.117846	0	0	8.36532	17.8882	PRF1
talampicillin-2954	1/100	0.117846	0.117846	0	0	8.36532	17.8882	S100A9
nadide-2529	1/100	0.117846	0.117846	0	0	8.36532	17.8882	FCGR3B
mebhydrolin-3269	1/100	0.117846	0.117846	0	0	8.36532	17.8882	NRGN
fluphenazine-1662	1/100	0.117846	0.117846	0	0	8.36532	17.8882	NRGN
chlorpropamide-1594	1/100	0.117846	0.117846	0	0	8.36532	17.8882	NRGN
lomefloxacin-4745	1/100	0.117846	0.117846	0	0	8.36532	17.8882	CRIP1
wortmannin-1081	1/100	0.117846	0.117846	0	0	8.36532	17.8882	ID1
prednisolone-2393	1/100	0.117846	0.117846	0	0	8.36532	17.8882	CCL2
finasteride-3744	1/100	0.117846	0.117846	0	0	8.36532	17.8882	PRF1
0225151-0000-6426	1/100	0.117846	0.117846	0	0	8.36532	17.8882	BEX1
cefotaxime-1389	1/100	0.117846	0.117846	0	0	8.36532	17.8882	NRGN
tropicamide-3722	1/100	0.117846	0.117846	0	0	8.36532	17.8882	PRF1
LY-294002-5224	1/100	0.117846	0.117846	0	0	8.36532	17.8882	S100A9
dirithromycin-1712	1/100	0.117846	0.117846	0	0	8.36532	17.8882	CRIP1
colforsin-7104	1/100	0.117846	0.117846	0	0	8.36532	17.8882	G0S2
isometheptene-3145	1/100	0.117846	0.117846	0	0	8.36532	17.8882	PRF1
(+)-isoprenaline-6663	1/100	0.117846	0.117846	0	0	8.36532	17.8882	G0S2
zomepirac-4479	1/100	0.117846	0.117846	0	0	8.36532	17.8882	BEX1
etodolac-2091	1/100	0.117846	0.117846	0	0	8.36532	17.8882	PPBP
tanespimycin-6978	1/100	0.117846	0.117846	0	0	8.36532	17.8882	ID1
tanespimycin-1651	1/100	0.117846	0.117846	0	0	8.36532	17.8882	ID1
paracetamol-5384	1/100	0.117846	0.117846	0	0	8.36532	17.8882	CRIP1
GW-8510-7085	1/100	0.117846	0.117846	0	0	8.36532	17.8882	ID1
kanamycin-5686	1/100	0.117846	0.117846	0	0	8.36532	17.8882	S100A9
cefmetazole-5868	1/100	0.117846	0.117846	0	0	8.36532	17.8882	BEX1
isocarboxazid-3684	1/100	0.117846	0.117846	0	0	8.36532	17.8882	PRF1
cefaclor-4967	1/100	0.117846	0.117846	0	0	8.36532	17.8882	S100A4
LY-294002-6935	1/100	0.117846	0.117846	0	0	8.36532	17.8882	NRGN
6-bromoindirubin-3'-oxime-6585	1/100	0.117846	0.117846	0	0	8.36532	17.8882	FABP4
iobenguane-7299	1/100	0.117846	0.117846	0	0	8.36532	17.8882	CRIP1
valproic acid-1150	1/100	0.117846	0.117846	0	0	8.36532	17.8882	CCL2
valproic acid-1155	1/100	0.117846	0.117846	0	0	8.36532	17.8882	CCL2
androsterone-1296	1/100	0.117846	0.117846	0	0	8.36532	17.8882	NRGN
butoconazole-5388	1/100	0.117846	0.117846	0	0	8.36532	17.8882	S100A9
fluphenazine-2697	1/100	0.117846	0.117846	0	0	8.36532	17.8882	G0S2
nabumetone-5428	1/100	0.117846	0.117846	0	0	8.36532	17.8882	S100A9
ciclosporin-1331	1/100	0.117846	0.117846	0	0	8.36532	17.8882	CCL2
etanidazole-6072	1/100	0.117846	0.117846	0	0	8.36532	17.8882	PRF1
nicotinic acid-3381	1/100	0.117846	0.117846	0	0	8.36532	17.8882	CRIP1
[truncated: 2,412 more rows]
