# Supplementary material for: Signatures of Co-Deregulated Genes and Their Transcriptional Regulators in Lung Cancer
Source: Int J Mol Sci. 2022 Sep 18;23(18):10933. doi: 10.3390/ijms231810933 (PMC9504879; doi:10.3390/ijms231810933)
Supplement: Supplementary file 1 [file ijms-23-10933-s001.zip › Table S8.xlsx]

## Sheet: Table S8
Table S8: Gene Ontology (GO) annotations significantly linked with the co-DEGs in experiments after single-gene perturbation. The terms are sorted according to the combined score.
Co-upregulated genes (Biological Process)
Term	Overlap	P-value	Adjusted P-value	Old P-value	Old Adjusted P-value	Odds Ratio	Combined Score	Genes
cytoplasmic translation (GO:0002181)	20/93	5.36245e-17	8.2769e-14	0	0	17.1509	642.549	RPL4;EIF4A1;RPL3;RPS7;RPS8;RPL22;RPL11;TMA7;RPL13A;RPL10A;RPS19;RPS29;RPL27A;RPS2;RPS11;RPL18;RPS27A;RPS13;RPS12;RPS23
cotranslational protein targeting to membrane (GO:0006613)	20/94	6.7101e-17	8.2769e-14	0	0	16.9182	630.04	RPL4;RPL3;ARL6IP1;RPS7;RPS8;RPL22;RPL11;RPL13A;RPL10A;SRP9;RPS19;RPS29;RPL27A;RPS2;RPS11;RPL18;RPS27A;RPS13;RPS12;RPS23
protein targeting to ER (GO:0045047)	20/103	4.47488e-16	2.92684e-13	0	0	15.0768	532.857	RPL4;RPL3;RPS7;RPS8;RPL22;RPL11;RPL13A;RPL10A;SRP9;RPS19;RPS29;RPL27A;SEC61G;RPS2;RPS11;RPL18;RPS27A;RPS13;RPS12;RPS23
SRP-dependent cotranslational protein targeting to membrane (GO:0006614)	19/90	4.74559e-16	2.92684e-13	0	0	16.7006	589.268	RPL4;RPL3;RPS7;RPS8;RPL22;RPL11;RPL13A;RPL10A;SRP9;RPS19;RPS29;RPL27A;RPS2;RPS11;RPL18;RPS27A;RPS13;RPS12;RPS23
nuclear-transcribed mRNA catabolic process, nonsense-mediated decay (GO:0000184)	19/113	3.94367e-14	1.94581e-11	0	0	12.5995	388.872	RPL4;RPL3;RPS7;RPS8;RPL22;RPL11;RPL13A;RPL10A;RPS19;RPS29;RPL27A;PABPC1;RPS2;RPS11;RPL18;RPS27A;RPS13;RPS12;RPS23
nuclear-transcribed mRNA catabolic process (GO:0000956)	22/171	1.14322e-13	4.70054e-11	0	0	9.26641	276.137	RPL4;RPL3;RPS7;RPS8;RPL22;RPL11;RPL13A;RPL10A;ZFP36L1;EXOSC7;RPS19;RPS29;RPL27A;CSDE1;PABPC1;RPS2;RPS11;RPL18;RPS27A;RPS13;RPS12;RPS23
cellular protein metabolic process (GO:0044267)	32/417	6.97693e-13	2.45887e-10	0	0	5.32445	149.037	RPL4;RPL3;RPL11;RPL10A;MRPL32;HSP90B1;C3;RPS19;CDH2;SPP1;CTSH;RPS2;RPS11;RPL18;RPS27A;RPS13;RPS12;NAPSA;RPS7;GOLM1;RPS8;SFTPC;RPL22;SFTPD;FN1;RPL13A;TF;RPS29;RPL27A;P4HB;SFTPA1;RPS23
translation (GO:0006412)	22/214	1.117e-11	3.44455e-09	0	0	7.17527	180.945	RPL4;RPL3;RPS7;RPS8;RPL22;RPL11;TMA7;RPL13A;RPL10A;EEF2;MRPL32;EEF1B2;RPS19;RPS29;RPL27A;RPS2;RPS11;RPL18;RPS27A;RPS13;RPS12;RPS23
peptide biosynthetic process (GO:0043043)	19/162	2.93314e-11	8.04005e-09	0	0	8.26146	200.36	RPL4;RPL3;RPS7;RPS8;RPL22;RPL11;RPL13A;RPL10A;MRPL32;RPS19;RPS29;RPL27A;RPS2;RPS11;RPL18;RPS27A;RPS13;RPS12;RPS23
neutrophil degranulation (GO:0043312)	31/481	1.39714e-10	3.44675e-08	0	0	4.38357	99.4694	CSTB;HSP90AB1;BRI3;MGST1;LPCAT1;HP;SLC2A3;C3;PRDX4;FTH1;PSAP;COTL1;CTSH;CD14;PGLYRP1;CTSC;CD177;HSPA8;ANXA3;NME2;NDUFC2;CYBA;ATP11A;LYZ;EEF2;LRG1;SLPI;PSMA2;NPC2;LCN2;CHI3L1
Co-upregulated genes (Cellular Component)
Term	Overlap	P-value	Adjusted P-value	Old P-value	Old Adjusted P-value	Odds Ratio	Combined Score	Genes
focal adhesion (GO:0005925)	31/387	5.25675e-13	9.7511e-11	0	0	5.56813	157.434	RPL4;NRP1;RPL3;ITGB5;RPL10A;RND3;ACTB;HSP90B1;ALCAM;RPS19;CDH2;RPS2;RPS11;RPL18;RPS13;ACTR3;HSPA8;NPM1;RPS7;RPS8;ITGA2;RPL22;NME2;RPL13A;RPS29;FAT1;CD9;PABPC1;P4HB;PHLDB2;EPHA2
cell-substrate junction (GO:0030055)	31/394	8.44251e-13	9.7511e-11	0	0	5.45878	151.756	RPL4;NRP1;RPL3;ITGB5;RPL10A;RND3;ACTB;HSP90B1;ALCAM;RPS19;CDH2;RPS2;RPS11;RPL18;RPS13;ACTR3;HSPA8;NPM1;RPS7;RPS8;ITGA2;RPL22;NME2;RPL13A;RPS29;FAT1;CD9;PABPC1;P4HB;PHLDB2;EPHA2
secretory granule lumen (GO:0034774)	27/316	3.9621e-12	3.05082e-10	0	0	5.91634	155.329	LGALS3BP;CSTB;ITIH4;SPARC;HSP90AB1;SERPINE1;HP;CLU;THBS1;C3;PRDX4;COTL1;CTSH;PGLYRP1;CTSC;HSPA8;FN1;NME2;LYZ;EEF2;TF;LRG1;SLPI;PSMA2;NPC2;LCN2;CHI3L1
cytosolic small ribosomal subunit (GO:0022627)	11/40	3.47441e-11	2.00647e-09	0	0	23.1332	557.118	RPS19;RPS7;RPS8;RPS29;RPS27L;RPS2;RPS11;RPS27A;RPS13;RPS12;RPS23
small ribosomal subunit (GO:0015935)	11/45	1.41643e-10	6.54389e-09	0	0	19.7263	447.346	RPS19;RPS7;RPS8;RPS29;RPS27L;RPS2;RPS11;RPS27A;RPS13;RPS12;RPS23
collagen-containing extracellular matrix (GO:0062023)	27/380	2.6863e-10	1.03422e-08	0	0	4.8277	106.391	LGALS3BP;CSTB;ITIH4;SPARC;SERPINE2;SERPINE1;LTBP2;LAMC2;CLU;THBS1;HSP90B1;CDH2;PSAP;CTSH;CTSC;LAMB3;FN1;F3;DCN;MFAP4;COL3A1;SLPI;COL4A2;COL4A1;OGN;S100A4;ANGPTL4
intracellular organelle lumen (GO:0070013)	38/848	3.09867e-08	1.02256e-06	0	0	2.99881	51.8486	CSTB;SPARC;HSP90AB1;SDC4;HP;THBS1;HSP90B1;HSPD1;C3;PRDX4;CDH2;FTH1;C1QBP;SPP1;COTL1;CTSH;PGLYRP1;HADH;CTSC;HSPA8;ARG2;GOLM1;FN1;NME2;LYZ;EEF2;SOD2;DCN;TF;COL3A1;LRG1;COL4A2;TST;PSMA2;COL4A1;OGN;SDC1;P4HB
ribosome (GO:0005840)	10/62	7.14195e-08	2.06224e-06	0	0	11.6784	192.164	RPS19;RPS7;RPS29;RPL11;RPL13A;RPL10A;RPS11;RPL18;RPS13;RPS23
clathrin-coated endocytic vesicle (GO:0045334)	11/85	1.64562e-07	4.22377e-06	0	0	9.04495	141.282	CD74;TF;TFRC;SFTPC;SFTPD;CD9;ADRB2;SFTPA1;AREG;EREG;HBEGF
cytosolic large ribosomal subunit (GO:0022625)	9/55	2.86176e-07	6.61066e-06	0	0	11.8484	178.516	RPL4;RPL3;RPL36AL;RPL27A;RPL22;RPL11;RPL13A;RPL10A;RPL18
Co-upregulated genes (Molecular Function)
Term	Overlap	P-value	Adjusted P-value	Old P-value	Old Adjusted P-value	Odds Ratio	Combined Score	Genes
RNA binding (GO:0003723)	53/1406	1.77272e-08	7.17953e-06	0	0	2.56214	45.7295	RPL4;EIF4A1;RPL3;HSP90AB1;TFRC;RPL10A;BZW1;MRPL32;RBM3;RPS19;C1QBP;DHX15;RPS11;CHCHD1;RPS13;RPS12;RPS7;RPS8;RPL22;FNDC3B;RPL13A;HLA-A;SRP9;DCN;SLPI;PSMA1;CSDE1;ESRP1;TCP1;S100A4;PABPC1;SLC25A5;CSTB;RPL11;RPS27L;ZFP36L1;HSP90B1;HSPD1;EXOSC7;RRS1;RPS2;RPL18;RPS27A;HSPA8;NPM1;CNBP;EEF2;KRT18;FASN;RPL27A;P4HB;EIF3A;RPS23
oxidoreduction-driven active transmembrane transporter activity (GO:0015453)	10/58	3.67641e-08	7.44473e-06	0	0	12.6542	216.623	COX8A;CYB5A;NDUFA4;NDUFA3;NDUFA2;NDUFA1;NDUFC2;UQCR11;COX6A1;COX6B1
endopeptidase regulator activity (GO:0061135)	8/46	8.16665e-07	0.00011025	0	0	12.7151	178.241	CSTB;ITIH4;SLPI;PSME1;FETUB;SPINT2;TFPI;WFDC2
cytochrome-c oxidase activity (GO:0004129)	5/15	3.25108e-06	0.000261381	0	0	29.9649	378.653	COX8A;CYB5A;NDUFA4;COX6A1;COX6B1
endopeptidase inhibitor activity (GO:0004866)	11/115	3.52222e-06	0.000261381	0	0	6.42597	80.6872	PRNP;CSTB;ITIH4;SERPINE2;SLPI;SERPINE1;FETUB;SPINT2;TFPI;GAPDH;WFDC2
peptidase inhibitor activity (GO:0030414)	7/40	3.87231e-06	0.000261381	0	0	12.7754	159.203	CSTB;ITIH4;SLPI;FETUB;SPINT2;TFPI;WFDC2
proton transmembrane transporter activity (GO:0015078)	6/40	4.84965e-05	0.00280587	0	0	10.5953	105.253	COX8A;CYB5A;NDUFA4;UQCR11;COX6A1;COX6B1
active ion transmembrane transporter activity (GO:0022853)	6/42	6.44504e-05	0.0032628	0	0	10.0056	96.5502	COX8A;CYB5A;NDUFA4;UQCR11;COX6A1;COX6B1
cadherin binding (GO:0045296)	16/322	0.000107829	0.00485229	0	0	3.1935	29.1725	HSPA8;HSP90AB1;EEF2;PAICS;BZW1;LDHA;GPRC5A;KRT18;CDH2;EPCAM;CDH1;FASN;TAGLN2;RPS2;PHLDB2;EPHA2
MHC class II protein complex binding (GO:0023026)	4/17	0.000151329	0.00514164	0	0	18.3811	161.681	CD74;HSPA8;HSP90AB1;ATP1B1
aminophospholipid flippase activity (GO:0015247)	3/7	0.000152345	0.00514164	0	0	44.6886	392.785	TMEM30B;ATP8B1;ATP11A
Co-downregulated genes (Biological Process)
Term	Overlap	P-value	Adjusted P-value	Old P-value	Old Adjusted P-value	Odds Ratio	Combined Score	Genes
cytoplasmic translation (GO:0002181)	54/93	1.04691e-60	3.3857e-57	0	0	55.5648	7674.02	RPL4;EIF4A1;RPL5;RPL3;RPL32;RPL34;RPLP0;RPL10A;RPL8;RPL9;RPL6;RPS15;RPL7A;RPS14;RPS17;RPS16;RPS19;RPS18;RPL35;RPL38;RPS10;RPS12;RPS9;RPS7;RPS8;RPS5;RPL22;RPL13A;RPSA;RPL37A;RPL24;RPL26;RPL29;RPL28;UBA52;RPL10;RPL12;RPL11;RPS15A;RPL14;RPL13;RPL15;RPS2;RPS27A;RPL17;RPL19;TMA7;RPS25;RPS28;RPS29;RPS20;RPS21;RPS24;RPS23
SRP-dependent cotranslational protein targeting to membrane (GO:0006614)	53/90	4.63854e-60	7.50052e-57	0	0	57.3711	7838.08	RPL4;RPL5;RPL3;RPL32;RPL34;RPLP0;RPL10A;RPL8;RPL9;RPL6;RPS15;RPL7A;RPS14;RPS17;RPS16;RPS19;RPS18;RPL35;RPLP2;RPL38;RPS10;RPS12;RPS9;RPS7;RPS8;RPS5;RPL22;RPL13A;RPSA;RPL37A;RPL24;RPL26;RPL29;RPL28;UBA52;RPL10;RPL12;RPL11;RPS15A;RPL14;RPL13;RPL15;RPS2;RPS27A;RPL17;RPL19;RPS25;RPS28;RPS29;RPS20;RPS21;RPS24;RPS23
cotranslational protein targeting to membrane (GO:0006613)	53/94	1.26849e-58	1.36744e-55	0	0	51.7633	6900.67	RPL4;RPL5;RPL3;RPL32;RPL34;RPLP0;RPL10A;RPL8;RPL9;RPL6;RPS15;RPL7A;RPS14;RPS17;RPS16;RPS19;RPS18;RPL35;RPLP2;RPL38;RPS10;RPS12;RPS9;RPS7;RPS8;RPS5;RPL22;RPL13A;RPSA;RPL37A;RPL24;RPL26;RPL29;RPL28;UBA52;RPL10;RPL12;RPL11;RPS15A;RPL14;RPL13;RPL15;RPS2;RPS27A;RPL17;RPL19;RPS25;RPS28;RPS29;RPS20;RPS21;RPS24;RPS23
protein targeting to ER (GO:0045047)	53/103	1.02284e-55	8.26963e-53	0	0	42.4262	5371.99	RPL4;RPL5;RPL3;RPL32;RPL34;RPLP0;RPL10A;RPL8;RPL9;RPL6;RPS15;RPS14;RPL7A;RPS17;RPS16;RPS19;RPS18;RPL35;RPLP2;RPL38;RPS10;RPS12;RPS9;RPS7;RPS8;RPS5;RPL22;RPL13A;RPSA;RPL37A;RPL24;RPL26;RPL29;RPL28;UBA52;RPL10;RPL12;RPL11;RPS15A;RPL14;RPL13;RPL15;RPS2;RPS27A;RPL17;RPL19;RPS25;RPS28;RPS29;RPS20;RPS21;RPS24;RPS23
nuclear-transcribed mRNA catabolic process, nonsense-mediated decay (GO:0000184)	54/113	1.83516e-54	1.18698e-51	0	0	36.6915	4539.93	RPL4;RPL5;RPL3;RPL32;RPL34;RPLP0;RPL10A;RPL8;RPL9;RPL6;RPS15;RPS14;RPL7A;RPS17;RPS16;RPS19;RPS18;RPL35;RPLP2;RPL38;RPS10;RPS12;RPS9;RPS7;RPS8;RPS5;RPL22;RPL13A;RPSA;RPL37A;RPL24;RPL26;PABPC1;RPL29;RPL28;UBA52;RPL10;RPL12;RPL11;RPS15A;RPL14;RPL13;RPL15;RPS2;RPS27A;RPL17;RPL19;RPS25;RPS28;RPS29;RPS20;RPS21;RPS24;RPS23
nuclear-transcribed mRNA catabolic process (GO:0000956)	56/171	2.40929e-45	1.29861e-42	0	0	19.5459	2008.09	RPL4;RPL5;RPL3;RPL32;RPL34;RPLP0;RPL10A;RPL8;RPL9;RPL6;RPS15;RPS14;RPL7A;RPS17;ZFP36;RPS16;RPS19;RPS18;RPL35;RPLP2;RPL38;RPS10;RPS12;RPS9;RPS7;RPS8;RPS5;RPL22;RPL13A;RPSA;CSDE1;RPL37A;RPL24;RPL26;PABPC1;RPL29;RPL28;UBA52;RPL10;RPL12;RPL11;RPS15A;RPL14;RPL13;RPL15;RPS2;RPS27A;RPL17;RPL19;RPS25;RPS28;RPS29;RPS20;RPS21;RPS24;RPS23
cellular protein metabolic process (GO:0044267)	78/417	3.86633e-43	1.78624e-40	0	0	9.56518	934.124	RPL4;RPL5;RPL3;RPL32;RPL34;RPLP0;PLOD2;RPL8;RPL10A;RPL9;RPL6;RPS15;RPL7A;RPS14;RPS17;LGALS1;RPS16;RPS19;RPS18;RPL35;RPLP2;CTSH;RPL38;TIMP1;RPS10;RPS12;SFTPB;RPS9;RPS7;IGFBP4;RPS8;IGFBP3;RPS5;RPL22;IGFBP2;RPL13A;RPSA;EEF1A1;LOX;RPL37A;MXRA8;RPL24;RPL26;RPL29;RPL28;UBA52;RPN2;RPL10;RPL12;RPL11;DENND3;LTBP1;HSP90B1;C3;CST3;RPS15A;RPL14;SPP1;ST8SIA4;RPL13;IGFBP7;RPL15;RPS2;IGFBP6;APOE;RPS27A;RPL17;RP…
peptide biosynthetic process (GO:0043043)	53/162	6.42465e-43	2.56585e-40	0	0	19.4024	1884.96	RPL4;RPL5;RPL3;RPL32;RPL34;RPLP0;RPL10A;RPL8;RPL9;RPL6;RPS15;RPS14;RPL7A;RPS17;RPS16;RPS19;RPS18;RPL35;RPLP2;RPL38;RPS10;RPS12;RPS9;RPS7;RPS8;RPS5;RPL22;RPL13A;RPSA;EEF1A1;RPL37A;RPL24;RPL26;RPL29;RPL28;RPL10;RPL12;RPL11;RPS15A;RPL14;RPL13;RPL15;RPS2;RPS27A;RPL17;RPL19;RPS25;RPS28;RPS29;RPS20;RPS21;RPS24;RPS23
translation (GO:0006412)	59/214	7.14058e-43	2.56585e-40	0	0	15.3426	1488.93	RPL4;RPL5;RPL3;RPL32;RPL34;RPLP0;RPL8;RPL10A;RPL9;RPL6;RPS15;EEF1B2;RPS14;RPL7A;RPS17;RPS16;RPS19;RPS18;RPL35;RPLP2;RPL38;RPS10;RPS12;RPS9;RPS7;RPS8;RPS5;RPL22;RPL13A;RPSA;EEF1A1;EEF1G;PPA1;RPL37A;RPL24;RPL26;RPL29;RPL28;UBA52;RPL10;RPL12;RPL11;RPS15A;RPL14;RPL13;RPL15;RPS2;RPS27A;RPL17;RPL19;TMA7;EEF2;RPS25;RPS28;RPS29;RPS20;RPS21;RPS24;RPS23
cellular macromolecule biosynthetic process (GO:0034645)	58/314	8.12148e-32	2.62649e-29	0	0	9.06533	648.971	RPL4;RPL5;ALAS2;RPL3;RPL32;RPL34;RPLP0;RPL8;RPL10A;RPL9;RPL6;RPS15;EEF1B2;RPS14;RPL7A;RPS17;RPS16;RPS19;RPS18;RPL35;RPLP2;RPL38;RPS10;RPS12;RPS9;RPS7;RPS8;RPS5;RPL22;RPL13A;RPSA;EEF1A1;EEF1G;RPL37A;RPL24;RPL26;RPL29;RPL28;RPL10;RPL12;RPL11;RPS15A;RPL14;RPL13;APOE;RPL15;RPS2;RPS27A;RPL17;RPL19;EEF2;RPS25;RPS28;RPS29;RPS20;RPS21;RPS24;RPS23
rRNA processing (GO:0006364)	43/173	2.16792e-29	6.37368e-27	0	0	12.918	852.606	RPL4;RPL5;RPL3;RPL32;RPL10;RPL34;RPL12;RPLP0;RPL11;RPL10A;RPL8;RPL9;RPL6;RPS15;RPS14;RPL7A;RPS17;RPS16;RPS19;RPL14;RPL35;RPLP2;RPL13;RPL38;RPL15;RPS2;RPL17;RPL19;RPS9;RPS7;RPL22;RPL13A;RPS25;RPS28;EIF6;RPL37A;NHP2;RPL24;RPL26;RPL29;RPL28;UBA52;RPS24
Co-downregulated genes (Cellular Component)
Term	Overlap	P-value	Adjusted P-value	Old P-value	Old Adjusted P-value	Odds Ratio	Combined Score	Genes
focal adhesion (GO:0005925)	85/387	5.31147e-53	1.30131e-50	0	0	11.9044	1432.9	RPL4;RPL5;ARF1;RPL3;RPLP0;FHL1;ITGB2;GDI2;HSPB1;RPL8;RPL10A;RPL9;RPL6;ACTB;ICAM1;RPS15;AKAP12;PPP1CC;RPL7A;RPS14;GJA1;RPS17;LASP1;RPS16;RPS19;RPS18;CFL1;BSG;CAPN2;RPLP2;RPL38;RAC1;B2M;RPS10;TNS1;TGM2;PDIA3;RPS9;ANXA1;RPS7;RPS8;RPS5;ACTN1;RPL22;ANXA5;RPL13A;ACTN4;RHOB;HCK;RPL37A;ITGA8;CDC42EP1;ITGA6;PABPC1;PFN1;PPIB;PPIA;VCL;ENG;RPL12;HSP90B1;SLC9A3R2;CNN2;PDLIM1;CTNNA1;RPS2;CD99;RPL19;MAPK3;HSPA8…
cell-substrate junction (GO:0030055)	85/394	2.51407e-52	3.07974e-50	0	0	11.6305	1381.85	RPL4;RPL5;ARF1;RPL3;RPLP0;FHL1;ITGB2;GDI2;HSPB1;RPL8;RPL10A;RPL9;RPL6;ACTB;ICAM1;RPS15;AKAP12;PPP1CC;RPL7A;RPS14;GJA1;RPS17;LASP1;RPS16;RPS19;RPS18;CFL1;BSG;CAPN2;RPLP2;RPL38;RAC1;B2M;RPS10;TNS1;TGM2;PDIA3;RPS9;ANXA1;RPS7;RPS8;RPS5;ACTN1;RPL22;ANXA5;RPL13A;ACTN4;RHOB;HCK;RPL37A;ITGA8;CDC42EP1;ITGA6;PABPC1;PFN1;PPIB;PPIA;VCL;ENG;RPL12;HSP90B1;SLC9A3R2;CNN2;PDLIM1;CTNNA1;RPS2;CD99;RPL19;MAPK3;HSPA8…
cytosolic large ribosomal subunit (GO:0022625)	29/55	2.55089e-31	2.08323e-29	0	0	42.5906	3000.24	RPL4;RPL5;RPL3;RPL32;RPL10;RPL34;RPL12;RPLP0;RPL11;RPL10A;RPL8;RPL9;RPL6;RPL7A;RPL14;RPL35;RPLP2;RPL13;RPL38;RPL15;RPL17;RPL19;RPL22;RPL13A;RPL37A;RPL24;RPL26;RPL29;RPL28
large ribosomal subunit (GO:0015934)	29/59	3.83452e-30	2.34865e-28	0	0	36.9043	2499.65	RPL4;RPL5;RPL3;RPL32;RPL10;RPL34;RPL12;RPLP0;RPL11;RPL10A;RPL8;RPL9;RPL6;RPL7A;RPL14;RPL35;RPLP2;RPL13;RPL38;RPL15;RPL17;RPL19;RPL22;RPL13A;RPL37A;RPL24;RPL26;RPL29;RPL28
cytosolic small ribosomal subunit (GO:0022627)	25/40	8.81171e-30	4.31774e-28	0	0	63.1806	4226.88	RPS15;RPS14;RPS17;RPS15A;RPS16;RPS19;RPS18;RPS2;RPS27A;RPS10;RPS12;RPS9;RPS7;RPS8;RPS5;ISG15;RPSA;RPS25;RPS28;RPS29;RPS20;RPS21;UBA52;RPS24;RPS23
small ribosomal subunit (GO:0015935)	25/45	6.12928e-28	2.50279e-26	0	0	47.3733	2968.38	RPS15;RPS14;RPS17;RPS15A;RPS16;RPS19;RPS18;RPS2;RPS27A;RPS10;RPS12;RPS9;RPS7;RPS8;RPS5;ISG15;RPSA;RPS25;RPS28;RPS29;RPS20;RPS21;UBA52;RPS24;RPS23
ribosome (GO:0005840)	25/62	1.8641e-23	6.52435e-22	0	0	25.5848	1339.02	RPL32;RPL11;RPL10A;RPL8;RPL9;RPL6;RPL7A;RPS17;RPS19;RPS18;RPL38;RPL15;RPS10;RPL19;BTF3;RPS9;RPS7;RPS5;RPL13A;RPS25;RPS28;RPS29;RPL24;RPS21;RPS23
collagen-containing extracellular matrix (GO:0062023)	53/380	4.44295e-23	1.36065e-21	0	0	6.39462	329.119	SERPINA3;SPARC;SERPINE2;CLEC14A;CTSS;LOXL1;ICAM1;LGALS3;LGALS1;EFEMP1;NPPA;TIMP2;CTSH;CTSD;CTSB;TGM2;POSTN;EGFL7;ANXA1;ANXA2;VWF;SERPINF1;ANXA5;ADIPOQ;BGN;PCOLCE;NPNT;DCN;BCAM;PKM;SLPI;COL6A2;PXDN;COL6A1;S100A6;SERPING1;S100A9;S100A8;C1QB;HTRA1;DPT;PRELP;LTBP1;HSP90B1;PSAP;SERPINH1;IGFBP7;APOE;S100A10;MFAP4;OGN;MGP;TGFBI
secretory granule lumen (GO:0034774)	44/316	2.71038e-19	7.37826e-18	0	0	6.28394	268.651	CFD;GPI;SERPINA3;VCP;SPARC;HSP90AB1;GSTP1;GDI2;HP;CXCL1;C3;PLAC8;CNN2;PSMB7;PSMB1;TIMP2;CTSH;TIMP1;B2M;CTSD;SPTAN1;GYG1;HSPA8;GSN;ANXA2;VWF;ACTN1;TUBB;HUWE1;ACTN4;EEF2;PRDX6;EEF1A1;PKM;SLPI;NPC2;LCN2;SERPING1;ALDOA;PPIA;S100A9;S100A8;VCL;FTL
intracellular organelle lumen (GO:0070013)	71/848	1.30392e-17	3.19459e-16	0	0	3.65606	142.142	GPI;ALAS2;HSP90AB1;SPARC;HP;CXCL1;DBI;CTSS;LGALS1;ALDH2;FTH1;C1QBP;TIMP2;CTSH;TIMP1;ACADM;PRSS3;GYG1;B2M;CTSD;SPTAN1;CTSB;PDIA3;GPX1;IGFBP4;IGFBP3;BGN;DCN;EEF1A1;PKM;MTHFD2;COL6A2;COL6A1;ERP29;MXRA8;SERPING1;ALDOA;PPIB;PPIA;VCL;CFD;VCP;OAT;GSTP1;PRELP;LTBP1;HSP90B1;HSPD1;C3;CST3;CNN2;PSMB7;HSPH1;OS9;PSMB1;SERPINH1;SPP1;IGFBP7;METTL7A;APOE;MAPK3;HSPA8;GSN;GOT2;HUWE1;FMO1;EEF2;OGN;SCGB3A2;P4HB;CALR
Co-downregulated genes (Molecular Function)
Term	Overlap	P-value	Adjusted P-value	Old P-value	Old Adjusted P-value	Odds Ratio	Combined Score	Genes
RNA binding (GO:0003723)	117/1406	6.30164e-29	3.33987e-26	0	0	3.91812	254.42	RPL4;RPL5;EIF4A1;RPL3;RPL32;RPL34;ENO1;RPL8;RPL10A;RPL9;RPL6;RPS15;PPP1CC;RPS14;LGALS3;ZFP36;RPS17;RPS16;LGALS1;RPS19;RPS18;RPL35;RPL38;HMGN2;RPS10;RPS12;TNS1;PDIA3;RPS9;RPS7;RPS8;RPS5;ACTN1;RPL22;RPSA;HLA-A;ACTN4;EEF1A1;SLPI;NHP2;RPL24;RPL26;RPL29;PFN1;PPIB;RPP25;RPL28;PPIA;VCP;CORO1A;HSP90B1;S100A16;PRDX1;PCBP1;UBC;SERPINH1;MYH10;BTF3;HSPA8;JUN;NONO;GOT2;MSN;EEF2;EIF2S2;RPS25;RPS28;RPS20;CALR;R…
cadherin binding (GO:0045296)	43/322	3.49314e-18	9.25682e-16	0	0	5.97277	240.08	BMPR2;HSP90AB1;RPL34;ENO1;RPL6;CNN2;SLC9A3R2;PDLIM1;CDH5;RPL7A;LDHA;LASP1;PCBP1;PRDX1;BSG;KDR;CTNNA1;RPL14;EIF4H;RPL15;RPS2;CLIC1;SPTAN1;HSPA8;ANXA1;ANXA2;EEF2;PRDX6;EEF1G;PTPRB;EHD4;GPRC5A;KRT18;PKM;FMNL2;RPL24;CDC42EP1;ITGA6;PFN1;RPL29;ALDOA;VCL;RAN
ubiquitin protein ligase binding (GO:0031625)	26/265	1.46397e-08	2.58634e-06	0	0	4.08438	73.6804	RPL5;GPI;VCP;HSP90AB1;RPL11;CXCR4;GABARAP;RELA;HSPD1;TUBA1B;UBC;CKB;RPS27A;HSPA8;JUN;TPI1;TUBB;ISG15;SMAD6;PRDX6;NFKBIA;TXNIP;TMBIM6;CALR;UBA52;VCL
ubiquitin-like protein ligase binding (GO:0044389)	26/282	5.21421e-08	6.90883e-06	0	0	3.80978	63.8874	RPL5;GPI;VCP;HSP90AB1;RPL11;CXCR4;GABARAP;RELA;HSPD1;TUBA1B;UBC;CKB;RPS27A;HSPA8;JUN;TPI1;TUBB;ISG15;SMAD6;PRDX6;NFKBIA;TXNIP;TMBIM6;CALR;UBA52;VCL
ubiquitin ligase inhibitor activity (GO:1990948)	5/8	7.24068e-07	7.67512e-05	0	0	60.8474	860.284	RPS15;RPL5;RPS7;RPL11;RPS20
ubiquitin-protein transferase inhibitor activity (GO:0055105)	5/9	1.59305e-06	0.000140719	0	0	45.6332	609.197	RPS15;RPL5;RPS7;RPL11;RPS20
mRNA binding (GO:0003729)	21/263	9.74115e-06	0.000737544	0	0	3.22602	37.2255	EIF4A1;RPL5;RPS7;RPS5;CNBP;RPL13A;EIF2S2;HNRNPAB;RPS14;ZFP36;PKM;SLPI;PCBP1;C1QBP;RPL35;RPL26;CALR;PABPC1;RPS2;MYH10;CCT5
endopeptidase inhibitor activity (GO:0004866)	13/115	1.33488e-05	0.000876172	0	0	4.69991	52.7521	SERPINA3;SERPINE2;ANXA2;SERPINF1;WFDC2;CST3;PTTG1;SLPI;SERPINH1;TIMP2;SERPING1;TIMP1;GAPDH
insulin-like growth factor I binding (GO:0031994)	5/13	1.48784e-05	0.000876172	0	0	22.8119	253.568	IGFBP4;IGFBP3;IGFBP2;ITGA6;IGFBP6
insulin-like growth factor II binding (GO:0031995)	4/7	1.69909e-05	0.000900517	0	0	48.5868	533.62	IGFBP4;IGFBP3;IGFBP2;IGFBP6
