# Supplementary material for: Signatures of Co-Deregulated Genes and Their Transcriptional Regulators in Lung Cancer
Source: Int J Mol Sci. 2022 Sep 18;23(18):10933. doi: 10.3390/ijms231810933 (PMC9504879; doi:10.3390/ijms231810933)
Supplement: Supplementary file 1 [file ijms-23-10933-s001.zip › Table S9.xlsx]

## Sheet: Table S9
Table S9: KEGG enrichment analysis for the co-DEGs in experiments with single-gene perturbation. The terms are sorted according to the combined score (Materials and methods).
Co-upregulated genes
Term	Overlap	P-value	Adjusted P-value	Old P-value	Old Adjusted P-value	Odds Ratio	Combined Score	Genes
Ribosome	21/158	2.18488e-13	5.09077e-11	0	0	9.59503	279.715	RPL4;RPL3;RPS7;RPS8;RPL22;RPL11;RPL13A;RPS27L;RPL10A;MRPL32;RPS19;RPL36AL;RPS29;RPL27A;RPS2;RPS11;RPL18;RPS27A;RPS13;RPS12;RPS23
Coronavirus disease	24/232	1.09757e-12	1.27867e-10	0	0	7.26624	200.097	RPL4;NRP1;RPL3;RPS7;RPS8;RPL22;RPL11;RPS27L;RPL13A;RPL10A;C3;C5;RPS19;RPL36AL;RPS29;RPL27A;RPS2;RPS11;RPL18;RPS27A;RPS13;RPS12;RPS23;HBEGF
Prion disease	20/273	3.57659e-08	2.77782e-06	0	0	4.90321	84.0717	COX8A;EGR1;HSPA8;PRNP;UQCRB;NDUFA4;NDUFA3;NDUFA2;NDUFA1;NDUFC2;UQCR11;CYBA;COX7A2;COX6A1;COX6B1;C5;PSMA4;PSMA1;PSMA2;SLC25A5
ECM-receptor interaction	11/88	2.36148e-07	1.37556e-05	0	0	8.69122	132.618	ITGB5;COL4A2;SDC4;LAMB3;COL4A1;ITGA2;SPP1;FN1;SDC1;LAMC2;THBS1
PI3K-Akt signaling pathway	21/354	5.70795e-07	2.6599e-05	0	0	3.90789	56.1807	CDKN1A;HSP90AB1;ITGB5;LAMB3;ITGA2;F2R;FN1;LAMC2;AREG;THBS1;EREG;HSP90B1;NR4A1;CCND1;COL4A2;COL4A1;DDIT4;KIT;SPP1;SGK1;EPHA2
Parkinson disease	17/249	1.03091e-06	4.00337e-05	0	0	4.5067	62.1251	COX8A;UQCRB;NDUFA4;NDUFA3;NDUFA2;NDUFA1;NDUFC2;UQCR11;COX7A2;COX6A1;COX6B1;PSMA4;PSMA1;PSMA2;RPS27A;SLC25A5;NFE2L2
Phagosome	13/152	1.64312e-06	4.89357e-05	0	0	5.70737	76.016	TFRC;ITGB5;ITGA2;SFTPD;CYBA;HLA-A;THBS1;ACTB;C3;SEC61G;MRC1;CD14;SFTPA1
Diabetic cardiomyopathy	15/203	1.6802e-06	4.89357e-05	0	0	4.88734	64.9851	COX8A;UQCRB;NDUFA4;NDUFA3;NDUFA2;NDUFA1;NDUFC2;UQCR11;CYBA;COX7A2;COX6A1;COX6B1;COL3A1;SLC25A5;GAPDH
Huntington disease	18/306	4.16194e-06	0.000107748	0	0	3.84504	47.6382	COX8A;GPX2;UQCRB;GPX3;NDUFA4;NDUFA3;NDUFA2;NDUFA1;NDUFC2;UQCR11;COX7A2;COX6A1;SOD2;COX6B1;PSMA4;PSMA1;PSMA2;SLC25A5
Non-alcoholic fatty liver disease	12/155	1.15135e-05	0.000268265	0	0	5.10398	58.0424	COX8A;CEBPA;UQCRB;NDUFA4;NDUFA3;NDUFA2;NDUFA1;NDUFC2;COX7A2;UQCR11;COX6A1;COX6B1
Oxidative phosphorylation	11/133	1.43217e-05	0.000281051	0	0	5.47284	61.0426	COX8A;UQCRB;NDUFA4;NDUFA3;NDUFA2;NDUFA1;NDUFC2;COX7A2;UQCR11;COX6A1;COX6B1
Co-downregulated genes
Term	Overlap	P-value	Adjusted P-value	Old P-value	Old Adjusted P-value	Odds Ratio	Combined Score	Genes
Coronavirus disease	66/232	6.63997e-49	1.80607e-46	0	0	16.254	1803.12	RPL4;RPL5;RPL3;RPL32;RPL34;RPLP0;RPL8;RPL10A;RPL9;RPL6;RPS15;RPS14;RPL7A;RPS17;RPS16;RPS19;RPS18;RPL35;RPLP2;RPL38;RPS10;RPS12;RPS9;RPS7;VWF;RPS8;RPS5;RPL22;RPL13A;RPSA;FOS;RPL37A;RPL24;RPL26;RPL29;RPL28;UBA52;CFD;C1QB;RPL10;RPL12;RPL11;RELA;C3;C5;RPS15A;RPL14;RPL13;RPL15;RPS2;RPS27A;RPL17;RPL19;MAPK3;JUN;ACE;ISG15;NFKBIA;RPS25;RPS28;RPS29;RPS20;FAU;RPS21;RPS24;RPS23
Ribosome	54/158	6.92642e-45	9.41993e-43	0	0	20.7671	2111.62	RPL4;RPL5;RPL3;RPL32;RPL34;RPLP0;RPL10A;RPL8;RPL9;RPL6;RPS15;RPS14;RPL7A;RPS17;RPS16;RPS19;RPS18;RPL35;RPLP2;RPL38;RPS10;RPS12;RPS9;RPS7;RPS8;RPS5;RPL22;RPL13A;RPSA;RPL37A;RPL24;RPL26;RPL29;RPL28;UBA52;RPL10;RPL12;RPL11;RPS15A;RPL14;RPL13;RPL15;RPS2;RPS27A;RPL17;RPL19;RPS25;RPS28;RPS29;RPS20;FAU;RPS21;RPS24;RPS23
Fluid shear stress and atherosclerosis	21/139	1.51526e-10	1.37384e-08	0	0	6.65875	150.556	JUN;GSTM1;BMPR2;HSP90AB1;CAV2;DUSP1;GSTO1;CAV1;GSTP1;MGST1;FOS;ACTB;RELA;ASS1;KLF2;ICAM1;HSP90B1;CDH5;THBD;KDR;RAC1
Legionellosis	13/57	2.77225e-09	1.88513e-07	0	0	10.9279	215.319	HSPA8;ARF1;VCP;ITGB2;CXCL1;CXCL3;CXCL2;RELA;HSPD1;EEF1A1;EEF1G;C3;NFKBIA
Kaposi sarcoma-associated herpesvirus infection	22/193	1.2735e-08	6.92783e-07	0	0	4.80985	87.4379	JUN;CXCL1;HLA-A;FOS;CXCL3;GNG11;CXCL2;GABARAP;RELA;ICAM1;C3;NFKBIA;HCK;ZFP36;GNG5;MYC;GNB2;UBC;RAC1;RPS27A;UBA52;MAPK3
Salmonella infection	25/249	1.75247e-08	7.94453e-07	0	0	4.18538	74.7494	ARF1;HSP90AB1;ACTB;RELA;HSP90B1;TUBA1B;TUBA1A;MYC;TNFSF10;RAC1;S100A10;MAPK3;JUN;ANXA2;TUBB;FOS;DYNLL1;RHOB;NFKBIA;MYL7;ARPC2;ARPC3;PFN1;MYL9;GAPDH
Human T-cell leukemia virus 1 infection	23/219	2.82921e-08	1.09935e-06	0	0	4.38991	76.2997	EGR1;HLA-DRB5;JUN;ITGB2;HLA-A;FOS;ETS1;RELA;ICAM1;NFKBIA;ZFP36;PTTG1;MYC;VDAC2;TSPO;CALR;B2M;HLA-DQA1;RAN;ATF4;HLA-DQB1;SLC25A6;MAPK3
Leukocyte transendothelial migration	16/114	6.82878e-08	2.32178e-06	0	0	6.05645	99.9287	ACTN1;ITGB2;MSN;CXCR4;ACTN4;ACTB;ICAM1;CDH5;CLDN5;MYL7;CTNNA1;ESAM;RAC1;MYL9;VCL;CD99
Regulation of actin cytoskeleton	22/218	1.15319e-07	3.37245e-06	0	0	4.19091	66.9522	GSN;ACTN1;F2R;ITGB2;CXCR4;MSN;ACTN4;FGF1;ACTB;PPP1CC;MYL7;ARPC2;ARPC3;CFL1;ITGA8;ITGA6;RAC1;PFN1;MYL9;MYH10;VCL;MAPK3
Focal adhesion	21/201	1.23987e-07	3.37245e-06	0	0	4.35119	69.1974	JUN;VWF;SHC1;CAV2;ACTN1;CAV1;ACTN4;ACTB;PPP1CC;MYL7;COL6A2;COL6A1;KDR;SPP1;CAPN2;ITGA8;ITGA6;RAC1;MYL9;VCL;MAPK3
