# Supplementary material for: Signatures of Co-Deregulated Genes and Their Transcriptional Regulators in Lung Cancer
Source: Int J Mol Sci. 2022 Sep 18;23(18):10933. doi: 10.3390/ijms231810933 (PMC9504879; doi:10.3390/ijms231810933)
Supplement: Supplementary file 1 [file ijms-23-10933-s001.zip › Table S10.xlsx]

## Sheet: Table S10
Table S10: Protein-protein interaction (PPI) sub-network around proteins encoded by the co-upregulated genes in LC after single-gene perturbation.
X2K
Rank	Transcription Factor	Hypergeometric p-value	Z-score	Combined score	Enriched Targets
1	CHD1	2.919e-05	0	0	" title="Overlapping EnrichrTargets" data-content="CHD1 targets 9 genes from the input gene list.Associations were determined from the following experiment:The full list of targets is available below:RPL39 RPN2 TUBA1C RPL19 MYL12B MIR21 HMGB1 DYNLT1 CDK2AP1" style="cursor: pointer; text-decoration: underline dotted;">9 targets
2	FOSL2	0.001517	0	0	" title="Overlapping EnrichrTargets" data-content="FOSL2 targets 4 genes from the input gene list.Associations were determined from the following experiment:The full list of targets is available below:TUBA1C NME1 S100A2 EFNA1" style="cursor: pointer; text-decoration: underline dotted;">4 targets
3	KLF4	0.002783	0	0	" title="Overlapping EnrichrTargets" data-content="KLF4 targets 8 genes from the input gene list.Associations were determined from the following experiment:The full list of targets is available below:TUBA1C SPP1 GAPDH MIF FOXA3 CNN3 RPL19 TUBB" style="cursor: pointer; text-decoration: underline dotted;">8 targets
4	STAT3	0.009021	0	0	" title="Overlapping EnrichrTargets" data-content="STAT3 targets 6 genes from the input gene list.Associations were determined from the following experiment:The full list of targets is available below:RPL27 RPN2 SEC61G MIR21 NME1 COX7A2" style="cursor: pointer; text-decoration: underline dotted;">6 targets
5	SOX2	0.01226	0	0	" title="Overlapping EnrichrTargets" data-content="SOX2 targets 6 genes from the input gene list.Associations were determined from the following experiment:The full list of targets is available below:SPP1 CTGF SCGB3A1 ITGAV CD24 TUBB" style="cursor: pointer; text-decoration: underline dotted;">6 targets
6	MYC	0.01396	0	0	" title="Overlapping EnrichrTargets" data-content="MYC targets 5 genes from the input gene list.Associations were determined from the following experiment:The full list of targets is available below:RPL27 RPL19 MIF TUBB NME1" style="cursor: pointer; text-decoration: underline dotted;">5 targets
7	NELFE	0.02117	0	0	" title="Overlapping EnrichrTargets" data-content="NELFE targets 3 genes from the input gene list.Associations were determined from the following experiment:The full list of targets is available below:RPL39 TUBA1C GAPDH" style="cursor: pointer; text-decoration: underline dotted;">3 targets
8	RAD21	0.03618	0	0	" title="Overlapping EnrichrTargets" data-content="RAD21 targets 7 genes from the input gene list.Associations were determined from the following experiment:The full list of targets is available below:COL1A2 SPP1 CTHRC1 RPL27 GPX8 NME1 CDK2AP1" style="cursor: pointer; text-decoration: underline dotted;">7 targets
9	ZKSCAN1	0.03724	0	0	" title="Overlapping EnrichrTargets" data-content="ZKSCAN1 targets 2 genes from the input gene list.Associations were determined from the following experiment:The full list of targets is available below:CDK2AP1 OCIAD2" style="cursor: pointer; text-decoration: underline dotted;">2 targets
10	TP63	0.05709	0	0	" title="Overlapping EnrichrTargets" data-content="TP63 targets 7 genes from the input gene list.Associations were determined from the following experiment:The full list of targets is available below:DSP OCIAD2 TNFSF10 HSD17B2 CNN3 GPX8 MYL12B" style="cursor: pointer; text-decoration: underline dotted;">7 targets
11	SALL4	0.05968	0	0	" title="Overlapping EnrichrTargets" data-content="SALL4 targets 3 genes from the input gene list.Associations were determined from the following experiment:The full list of targets is available below:CTGF CNN3 SCGB3A1" style="cursor: pointer; text-decoration: underline dotted;">3 targets
12	TAF1	0.05979	0	0	" title="Overlapping EnrichrTargets" data-content="TAF1 targets 13 genes from the input gene list.Associations were determined from the following experiment:The full list of targets is available below:GAPDH SEC61G TUBA1C MIF FOXA3 HMGB1 RPL39 RPL27 RPL19 MYL12B NDUFA1 NME1 COX7A2" style="cursor: pointer; text-decoration: underline dotted;">13 targets
13	NANOG	0.06138	0	0	" title="Overlapping EnrichrTargets" data-content="NANOG targets 4 genes from the input gene list.Associations were determined from the following experiment:The full list of targets is available below:SPP1 CTGF SCGB3A1 SEC61G" style="cursor: pointer; text-decoration: underline dotted;">4 targets
14	FLI1	0.07926	0	0	" title="Overlapping EnrichrTargets" data-content="FLI1 targets 4 genes from the input gene list.Associations were determined from the following experiment:The full list of targets is available below:RPL27 SEC61G NME1 COX7A2" style="cursor: pointer; text-decoration: underline dotted;">4 targets
15	HNF4A	0.09676	0	0	" title="Overlapping EnrichrTargets" data-content="HNF4A targets 6 genes from the input gene list.Associations were determined from the following experiment:The full list of targets is available below:CTGF OCIAD2 RPL27 SERPIND1 MYL12B EFNA1" style="cursor: pointer; text-decoration: underline dotted;">6 targets
16	TRIM28	0.09822	0	0	" title="Overlapping EnrichrTargets" data-content="TRIM28 targets 2 genes from the input gene list.Associations were determined from the following experiment:The full list of targets is available below:HMGN3 ITGAV" style="cursor: pointer; text-decoration: underline dotted;">2 targets
17	IRF1	0.1417	0	0	" title="Overlapping EnrichrTargets" data-content="IRF1 targets 2 genes from the input gene list.Associations were determined from the following experiment:The full list of targets is available below:SSR4 NME1" style="cursor: pointer; text-decoration: underline dotted;">2 targets
18	CTCF	0.1555	0	0	" title="Overlapping EnrichrTargets" data-content="CTCF targets 7 genes from the input gene list.Associations were determined from the following experiment:The full list of targets is available below:SPP1 CDK2AP1 COL1A2 CTHRC1 FOXA3 RPL27 NME1" style="cursor: pointer; text-decoration: underline dotted;">7 targets
19	ELF1	0.1592	0	0	" title="Overlapping EnrichrTargets" data-content="ELF1 targets 9 genes from the input gene list.Associations were determined from the following experiment:The full list of targets is available below:MYL12B SEC61G TUBA1C NDUFA1 MIF FOXA3 RPL27 RPN2 RPL19" style="cursor: pointer; text-decoration: underline dotted;">9 targets
20	PPARD	0.1608	0	0	" title="Overlapping EnrichrTargets" data-content="PPARD targets 2 genes from the input gene list.Associations were determined from the following experiment:The full list of targets is available below:POSTN DYNLT1" style="cursor: pointer; text-decoration: underline dotted;">2 targets
21	MYC	0.1751	0	0	" title="Overlapping EnrichrTargets" data-content="MYC targets 6 genes from the input gene list.Associations were determined from the following experiment:The full list of targets is available below:TUBA1C MIF RPL39 RPL27 RPL19 NME1" style="cursor: pointer; text-decoration: underline dotted;">6 targets
22	EGR1	0.1876	0	0	" title="Overlapping EnrichrTargets" data-content="EGR1 targets 2 genes from the input gene list.Associations were determined from the following experiment:The full list of targets is available below:HSD17B2 DYNLT1" style="cursor: pointer; text-decoration: underline dotted;">2 targets
23	KAT2A	0.2042	0	0	" title="Overlapping EnrichrTargets" data-content="KAT2A targets 1 genes from the input gene list.Associations were determined from the following experiment:The full list of targets is available below:RPL27" style="cursor: pointer; text-decoration: underline dotted;">1 targets
24	FOS	0.2142	0	0	" title="Overlapping EnrichrTargets" data-content="FOS targets 3 genes from the input gene list.Associations were determined from the following experiment:The full list of targets is available below:RPN2 S100A2 HMGB1" style="cursor: pointer; text-decoration: underline dotted;">3 targets
25	TCF3	0.244	0	0	" title="Overlapping EnrichrTargets" data-content="TCF3 targets 4 genes from the input gene list.Associations were determined from the following experiment:The full list of targets is available below:SPP1 CTGF SCGB3A1 CNN3" style="cursor: pointer; text-decoration: underline dotted;">4 targets
26	MAX	0.2581	0	0	" title="Overlapping EnrichrTargets" data-content="MAX targets 7 genes from the input gene list.Associations were determined from the following experiment:The full list of targets is available below:TUBA1C MIF RPL39 RPL27 SSR4 RPL19 NME1" style="cursor: pointer; text-decoration: underline dotted;">7 targets
27	SPI1	0.2719	0	0	" title="Overlapping EnrichrTargets" data-content="SPI1 targets 4 genes from the input gene list.Associations were determined from the following experiment:The full list of targets is available below:TUBA1C ITGAV RPL27 MYL12B" style="cursor: pointer; text-decoration: underline dotted;">4 targets
28	ATF2	0.2783	0	0	" title="Overlapping EnrichrTargets" data-content="ATF2 targets 9 genes from the input gene list.Associations were determined from the following experiment:The full list of targets is available below:GAPDH HMGN3 TUBA1C DYNLT1 RPL27 RPL19 MIR21 NME1 COX7A2" style="cursor: pointer; text-decoration: underline dotted;">9 targets
29	SIN3A	0.3148	0	0	" title="Overlapping EnrichrTargets" data-content="SIN3A targets 4 genes from the input gene list.Associations were determined from the following experiment:The full list of targets is available below:TUBA1C GAPDH HMGB1 NME1" style="cursor: pointer; text-decoration: underline dotted;">4 targets
30	ESR1	0.3229	0	0	" title="Overlapping EnrichrTargets" data-content="ESR1 targets 1 genes from the input gene list.Associations were determined from the following experiment:The full list of targets is available below:EFNA1" style="cursor: pointer; text-decoration: underline dotted;">1 targets
31	TCF3	0.3531	0	0	" title="Overlapping EnrichrTargets" data-content="TCF3 targets 3 genes from the input gene list.Associations were determined from the following experiment:The full list of targets is available below:TUBA1C ITGAV MYL12B" style="cursor: pointer; text-decoration: underline dotted;">3 targets
32	FOXP2	0.3628	0	0	" title="Overlapping EnrichrTargets" data-content="FOXP2 targets 1 genes from the input gene list.Associations were determined from the following experiment:The full list of targets is available below:RPL27" style="cursor: pointer; text-decoration: underline dotted;">1 targets
33	PML	0.3714	0	0	" title="Overlapping EnrichrTargets" data-content="PML targets 5 genes from the input gene list.Associations were determined from the following experiment:The full list of targets is available below:ITGAV GAPDH TUBA1C NDUFA1 MIF" style="cursor: pointer; text-decoration: underline dotted;">5 targets
34	PPARG	0.3904	0	0	" title="Overlapping EnrichrTargets" data-content="PPARG targets 2 genes from the input gene list.Associations were determined from the following experiment:The full list of targets is available below:RPL27 TUBA1C" style="cursor: pointer; text-decoration: underline dotted;">2 targets
35	PBX3	0.3952	0	0	" title="Overlapping EnrichrTargets" data-content="PBX3 targets 4 genes from the input gene list.Associations were determined from the following experiment:The full list of targets is available below:GAPDH RPN2 SSR4 HMGN3" style="cursor: pointer; text-decoration: underline dotted;">4 targets
36	ZMIZ1	0.4043	0	0	" title="Overlapping EnrichrTargets" data-content="ZMIZ1 targets 3 genes from the input gene list.Associations were determined from the following experiment:The full list of targets is available below:TUBA1C MYL12B MIR21" style="cursor: pointer; text-decoration: underline dotted;">3 targets
37	GABPA	0.4251	0	0	" title="Overlapping EnrichrTargets" data-content="GABPA targets 6 genes from the input gene list.Associations were determined from the following experiment:The full list of targets is available below:MYL12B SEC61G FOXA3 RPL27 NME1 COX7A2" style="cursor: pointer; text-decoration: underline dotted;">6 targets
38	TCF7L2	0.4327	0	0	" title="Overlapping EnrichrTargets" data-content="TCF7L2 targets 2 genes from the input gene list.Associations were determined from the following experiment:The full list of targets is available below:DSP EFNA1" style="cursor: pointer; text-decoration: underline dotted;">2 targets
39	SMAD4	0.4336	0	0	" title="Overlapping EnrichrTargets" data-content="SMAD4 targets 2 genes from the input gene list.Associations were determined from the following experiment:The full list of targets is available below:SERPIND1 S100A2" style="cursor: pointer; text-decoration: underline dotted;">2 targets
40	USF2	0.4391	0	0	" title="Overlapping EnrichrTargets" data-content="USF2 targets 3 genes from the input gene list.Associations were determined from the following experiment:The full list of targets is available below:GAPDH RPL19 NME1" style="cursor: pointer; text-decoration: underline dotted;">3 targets
41	STAT5A	0.4457	0	0	" title="Overlapping EnrichrTargets" data-content="STAT5A targets 1 genes from the input gene list.Associations were determined from the following experiment:The full list of targets is available below:MIR21" style="cursor: pointer; text-decoration: underline dotted;">1 targets
42	EZH2	0.4513	0	0	" title="Overlapping EnrichrTargets" data-content="EZH2 targets 1 genes from the input gene list.Associations were determined from the following experiment:The full list of targets is available below:CD24" style="cursor: pointer; text-decoration: underline dotted;">1 targets
43	SP2	0.4585	0	0	" title="Overlapping EnrichrTargets" data-content="SP2 targets 3 genes from the input gene list.Associations were determined from the following experiment:The full list of targets is available below:RPN2 SSR4 COX7A2" style="cursor: pointer; text-decoration: underline dotted;">3 targets
44	TAF7	0.481	0	0	" title="Overlapping EnrichrTargets" data-content="TAF7 targets 2 genes from the input gene list.Associations were determined from the following experiment:The full list of targets is available below:RPL27 TUBA1C" style="cursor: pointer; text-decoration: underline dotted;">2 targets
45	CREB1	0.4955	0	0	" title="Overlapping EnrichrTargets" data-content="CREB1 targets 4 genes from the input gene list.Associations were determined from the following experiment:The full list of targets is available below:TUBA1C GAPDH HMGB1 NME1" style="cursor: pointer; text-decoration: underline dotted;">4 targets
46	NFYA	0.5034	0	0	" title="Overlapping EnrichrTargets" data-content="NFYA targets 6 genes from the input gene list.Associations were determined from the following experiment:The full list of targets is available below:HMGN3 SEC61G HMGB1 RPL27 RPN2 SSR4" style="cursor: pointer; text-decoration: underline dotted;">6 targets
47	NFIC	0.507	0	0	" title="Overlapping EnrichrTargets" data-content="NFIC targets 1 genes from the input gene list.Associations were determined from the following experiment:The full list of targets is available below:GAPDH" style="cursor: pointer; text-decoration: underline dotted;">1 targets
48	RCOR1	0.5307	0	0	" title="Overlapping EnrichrTargets" data-content="RCOR1 targets 2 genes from the input gene list.Associations were determined from the following experiment:The full list of targets is available below:MYL12B COX6C" style="cursor: pointer; text-decoration: underline dotted;">2 targets
49	YY1	0.5487	0	0	" title="Overlapping EnrichrTargets" data-content="YY1 targets 7 genes from the input gene list.Associations were determined from the following experiment:The full list of targets is available below:GAPDH CDK2AP1 FOXA3 HMGB1 RPN2 SSR4 COX7A2" style="cursor: pointer; text-decoration: underline dotted;">7 targets
50	FOXA2	0.5514	0	0	" title="Overlapping EnrichrTargets" data-content="FOXA2 targets 1 genes from the input gene list.Associations were determined from the following experiment:The full list of targets is available below:EFNA1" style="cursor: pointer; text-decoration: underline dotted;">1 targets
51	ZNF384	0.5521	0	0	" title="Overlapping EnrichrTargets" data-content="ZNF384 targets 2 genes from the input gene list.Associations were determined from the following experiment:The full list of targets is available below:RPL27 TUBA1C" style="cursor: pointer; text-decoration: underline dotted;">2 targets
52	TP53	0.5548	0	0	" title="Overlapping EnrichrTargets" data-content="TP53 targets 1 genes from the input gene list.Associations were determined from the following experiment:The full list of targets is available below:S100A2" style="cursor: pointer; text-decoration: underline dotted;">1 targets
53	CEBPD	0.5552	0	0	" title="Overlapping EnrichrTargets" data-content="CEBPD targets 2 genes from the input gene list.Associations were determined from the following experiment:The full list of targets is available below:TUBA1C MIR21" style="cursor: pointer; text-decoration: underline dotted;">2 targets
54	SMC3	0.5766	0	0	" title="Overlapping EnrichrTargets" data-content="SMC3 targets 3 genes from the input gene list.Associations were determined from the following experiment:The full list of targets is available below:COL1A2 CTHRC1 GPX8" style="cursor: pointer; text-decoration: underline dotted;">3 targets
55	GATA2	0.583	0	0	" title="Overlapping EnrichrTargets" data-content="GATA2 targets 2 genes from the input gene list.Associations were determined from the following experiment:The full list of targets is available below:TUBA1C TNFSF10" style="cursor: pointer; text-decoration: underline dotted;">2 targets
56	NR2C2	0.5888	0	0	" title="Overlapping EnrichrTargets" data-content="NR2C2 targets 1 genes from the input gene list.Associations were determined from the following experiment:The full list of targets is available below:RPL27" style="cursor: pointer; text-decoration: underline dotted;">1 targets
57	BCLAF1	0.637	0	0	" title="Overlapping EnrichrTargets" data-content="BCLAF1 targets 2 genes from the input gene list.Associations were determined from the following experiment:The full list of targets is available below:MIR21 NME1" style="cursor: pointer; text-decoration: underline dotted;">2 targets
58	RUNX1	0.6403	0	0	" title="Overlapping EnrichrTargets" data-content="RUNX1 targets 3 genes from the input gene list.Associations were determined from the following experiment:The full list of targets is available below:TUBA1C MYL12B NME1" style="cursor: pointer; text-decoration: underline dotted;">3 targets
59	E2F1	0.6422	0	0	" title="Overlapping EnrichrTargets" data-content="E2F1 targets 2 genes from the input gene list.Associations were determined from the following experiment:The full list of targets is available below:MIF RPL39" style="cursor: pointer; text-decoration: underline dotted;">2 targets
60	ZBTB7A	0.656	0	0	" title="Overlapping EnrichrTargets" data-content="ZBTB7A targets 5 genes from the input gene list.Associations were determined from the following experiment:The full list of targets is available below:CDK2AP1 TUBA1C CTHRC1 HMGB1 DYNLT1" style="cursor: pointer; text-decoration: underline dotted;">5 targets
61	USF1	0.7048	0	0	" title="Overlapping EnrichrTargets" data-content="USF1 targets 3 genes from the input gene list.Associations were determined from the following experiment:The full list of targets is available below:GAPDH RPL19 NME1" style="cursor: pointer; text-decoration: underline dotted;">3 targets
62	NRF1	0.7102	0	0	" title="Overlapping EnrichrTargets" data-content="NRF1 targets 4 genes from the input gene list.Associations were determined from the following experiment:The full list of targets is available below:COX6C SEC61G FOXA3 RPL19" style="cursor: pointer; text-decoration: underline dotted;">4 targets
63	BRCA1	0.7234	0	0	" title="Overlapping EnrichrTargets" data-content="BRCA1 targets 7 genes from the input gene list.Associations were determined from the following experiment:The full list of targets is available below:GAPDH MIF RPL27 MYL12B CTGF RPN2 SSR4" style="cursor: pointer; text-decoration: underline dotted;">7 targets
64	NFE2L2	0.7356	0	0	" title="Overlapping EnrichrTargets" data-content="NFE2L2 targets 2 genes from the input gene list.Associations were determined from the following experiment:The full list of targets is available below:COL1A2 COX6C" style="cursor: pointer; text-decoration: underline dotted;">2 targets
65	EGR1	0.746	0	0	" title="Overlapping EnrichrTargets" data-content="EGR1 targets 1 genes from the input gene list.Associations were determined from the following experiment:The full list of targets is available below:NME1" style="cursor: pointer; text-decoration: underline dotted;">1 targets
66	SPI1	0.7557	0	0	" title="Overlapping EnrichrTargets" data-content="SPI1 targets 3 genes from the input gene list.Associations were determined from the following experiment:The full list of targets is available below:ITGAV HMGB1 RPL27" style="cursor: pointer; text-decoration: underline dotted;">3 targets
67	RFX5	0.7601	0	0	" title="Overlapping EnrichrTargets" data-content="RFX5 targets 1 genes from the input gene list.Associations were determined from the following experiment:The full list of targets is available below:HMGN3" style="cursor: pointer; text-decoration: underline dotted;">1 targets
68	UBTF	0.7904	0	0	" title="Overlapping EnrichrTargets" data-content="UBTF targets 3 genes from the input gene list.Associations were determined from the following experiment:The full list of targets is available below:ITGAV CDK2AP1 HMGB1" style="cursor: pointer; text-decoration: underline dotted;">3 targets
69	SUZ12	0.8088	0	0	" title="Overlapping EnrichrTargets" data-content="SUZ12 targets 3 genes from the input gene list.Associations were determined from the following experiment:The full list of targets is available below:FGF13 HMGN3 CD24" style="cursor: pointer; text-decoration: underline dotted;">3 targets
70	IRF3	0.817	0	0	" title="Overlapping EnrichrTargets" data-content="IRF3 targets 1 genes from the input gene list.Associations were determined from the following experiment:The full list of targets is available below:RPN2" style="cursor: pointer; text-decoration: underline dotted;">1 targets
71	ZBTB33	0.8348	0	0	" title="Overlapping EnrichrTargets" data-content="ZBTB33 targets 1 genes from the input gene list.Associations were determined from the following experiment:The full list of targets is available below:SSR4" style="cursor: pointer; text-decoration: underline dotted;">1 targets
72	SP1	0.8369	0	0	" title="Overlapping EnrichrTargets" data-content="SP1 targets 1 genes from the input gene list.Associations were determined from the following experiment:The full list of targets is available below:RPN2" style="cursor: pointer; text-decoration: underline dotted;">1 targets
73	E2F4	0.8382	0	0	" title="Overlapping EnrichrTargets" data-content="E2F4 targets 1 genes from the input gene list.Associations were determined from the following experiment:The full list of targets is available below:HMGB1" style="cursor: pointer; text-decoration: underline dotted;">1 targets
74	NFYB	0.8556	0	0	" title="Overlapping EnrichrTargets" data-content="NFYB targets 7 genes from the input gene list.Associations were determined from the following experiment:The full list of targets is available below:GAPDH SEC61G TUBA1C HMGB1 HMGN3 RPN2 SSR4" style="cursor: pointer; text-decoration: underline dotted;">7 targets
75	E2F6	0.9313	0	0	" title="Overlapping EnrichrTargets" data-content="E2F6 targets 5 genes from the input gene list.Associations were determined from the following experiment:The full list of targets is available below:GAPDH CNN3 CTHRC1 MIF HMGN3" style="cursor: pointer; text-decoration: underline dotted;">5 targets
76	CREB1	0.9331	0	0	" title="Overlapping EnrichrTargets" data-content="CREB1 targets 3 genes from the input gene list.Associations were determined from the following experiment:The full list of targets is available below:HMGB1 RPL27 SSR4" style="cursor: pointer; text-decoration: underline dotted;">3 targets
77	SIX5	0.9417	0	0	" title="Overlapping EnrichrTargets" data-content="SIX5 targets 1 genes from the input gene list.Associations were determined from the following experiment:The full list of targets is available below:FOXA3" style="cursor: pointer; text-decoration: underline dotted;">1 targets
78	AR	0.9418	0	0	" title="Overlapping EnrichrTargets" data-content="AR targets 1 genes from the input gene list.Associations were determined from the following experiment:The full list of targets is available below:EFNA1" style="cursor: pointer; text-decoration: underline dotted;">1 targets
KEA
Rank	Protein Kinase	Hypergeometric p-value	Z-score	Combined score	Enriched Substrates
1	HIPK2	1.108e-15	0	0	" title="Overlapping EnrichrSubstrates" data-content="HIPK2 targets 15 genes from the input gene list.The full list of substrates is available below:MYC TP63 HIF1A SMAD2 SMAD3 NFKB1 IKBKB SUMO1 CHUK SIRT1 NCOR1 CEBPB RELA MAPK8 PML" style="cursor: pointer; text-decoration: underline dotted;">15 substrates
2	CDK1	6.774e-15	0	0	" title="Overlapping EnrichrSubstrates" data-content="CDK1 targets 31 genes from the input gene list.The full list of substrates is available below:JUN NELFE SIRT1 STAT3 PIM1 NFKB1 SP1 HSP90AA1 CTR9 RELA VHL RB1 MYC HIF1A RAD21 FOSL2 CDKN1A NCOR1 CDKN2A GTF2I CHUK CEBPA CEBPB HDAC2 KLF4 PML SOX2 KAT5 SMAD3 MAPK8 MAPK1" style="cursor: pointer; text-decoration: underline dotted;">31 substrates
3	MAPK1	4.219e-14	0	0	" title="Overlapping EnrichrSubstrates" data-content="MAPK1 targets 22 genes from the input gene list.The full list of substrates is available below:RB1 MYC HIF1A JUN FOSL2 CDKN1A CDKN2A STAT3 PIM1 GTF2I FBXW7 SP1 CHUK CEBPA CEBPB KLF4 PML RELA SMAD2 SMAD3 MAPK8 MAPK1" style="cursor: pointer; text-decoration: underline dotted;">22 substrates
4	CSNK2A1	5.862e-14	0	0	" title="Overlapping EnrichrSubstrates" data-content="CSNK2A1 targets 29 genes from the input gene list.The full list of substrates is available below:DAXX JUN NELFE SIRT1 STAT3 PIM1 PIN1 SUMO1 HSP90AA1 CTR9 RELA VHL RB1 MYC HIF1A RAD21 FOSL2 CDKN1A NCOR1 CDKN2A CHUK CEBPB HDAC2 HDAC3 KLF4 PML SOX2 SMAD3 MAPK1" style="cursor: pointer; text-decoration: underline dotted;">29 substrates
5	JNK1	9.325e-14	0	0	" title="Overlapping EnrichrSubstrates" data-content="JNK1 targets 12 genes from the input gene list.The full list of substrates is available below:CDKN1A MYC SIRT1 HIF1A RELA MAPK8 SMAD2 JUN SMAD3 STAT3 NFKB1 SP1" style="cursor: pointer; text-decoration: underline dotted;">12 substrates
6	MAPK14	1.328e-13	0	0	" title="Overlapping EnrichrSubstrates" data-content="MAPK14 targets 24 genes from the input gene list.The full list of substrates is available below:JUN NELFE STAT3 PIM1 SP1 HSP90AA1 RELA VHL RB1 MYC HIF1A FOSL2 CDKN1A NCOR1 CDKN2A GTF2I CHUK CEBPA CEBPB KLF4 KAT5 SMAD3 MAPK8 MAPK1" style="cursor: pointer; text-decoration: underline dotted;">24 substrates
7	ERK1	2.418e-13	0	0	" title="Overlapping EnrichrSubstrates" data-content="ERK1 targets 14 genes from the input gene list.The full list of substrates is available below:KAT5 MYC GTF2I PRKCD HIF1A SMAD2 JUN SMAD3 NFKB1 SP1 CEBPB RELA MAPK8 STAT3" style="cursor: pointer; text-decoration: underline dotted;">14 substrates
8	CDK4	6.187e-13	0	0	" title="Overlapping EnrichrSubstrates" data-content="CDK4 targets 13 genes from the input gene list.The full list of substrates is available below:RB1 MYC SMAD2 JUN SMAD3 SP1 CDKN1A SUMO1 HSP90AA1 CEBPA CEBPB CDKN2A STAT3" style="cursor: pointer; text-decoration: underline dotted;">13 substrates
9	GSK3B	2.63e-12	0	0	" title="Overlapping EnrichrSubstrates" data-content="GSK3B targets 31 genes from the input gene list.The full list of substrates is available below:JUN SP1 TP63 RELA FOSL2 CDKN1A NCOR1 CDKN2A GTF2I CEBPA CEBPB PML KAT5 MAPK8 MAPK1 DAXX SIRT1 STAT3 PIM1 NFKB1 NFKB2 CTR9 VHL RB1 MYC HIF1A CHUK KLF4 SOX2 SMAD2 SMAD3" style="cursor: pointer; text-decoration: underline dotted;">31 substrates
10	MAPK3	5.236e-12	0	0	" title="Overlapping EnrichrSubstrates" data-content="MAPK3 targets 16 genes from the input gene list.The full list of substrates is available below:MYC JUN FOSL2 CDKN1A STAT3 GTF2I FBXW7 SMAD2 SMAD3 SP1 CHUK CEBPA CEBPB MAPK8 KLF4 PML" style="cursor: pointer; text-decoration: underline dotted;">16 substrates
11	DNAPK	2.371e-11	0	0	" title="Overlapping EnrichrSubstrates" data-content="DNAPK targets 11 genes from the input gene list.The full list of substrates is available below:SOX2 KAT5 PRKCD SMAD2 JUN SP1 IKBKB HSP90AA1 CHUK RELA MAPK8" style="cursor: pointer; text-decoration: underline dotted;">11 substrates
12	CDK2	1.461e-09	0	0	" title="Overlapping EnrichrSubstrates" data-content="CDK2 targets 30 genes from the input gene list.The full list of substrates is available below:JUN SP1 TP63 FOSL2 CDKN1A CDKN2A GTF2I CEBPB HDAC2 PML KAT5 MAPK8 MAPK1 DAXX NELFE STAT3 PIM1 SUMO1 HSP90AA1 CTR9 VHL RB1 MYC HIF1A RAD21 CDK9 CHUK SOX2 SMAD2 SMAD3" style="cursor: pointer; text-decoration: underline dotted;">30 substrates
13	MAPK8	3.954e-09	0	0	" title="Overlapping EnrichrSubstrates" data-content="MAPK8 targets 12 genes from the input gene list.The full list of substrates is available below:SOX2 MYC JUN FOSL2 CDKN1A SIRT1 CDKN2A STAT3 GTF2I SP1 MAPK1 KLF4" style="cursor: pointer; text-decoration: underline dotted;">12 substrates
14	IKKALPHA	8.144e-09	0	0	" title="Overlapping EnrichrSubstrates" data-content="IKKALPHA targets 6 genes from the input gene list.The full list of substrates is available below:HSP90AA1 CHUK NFKB1 RELA NFKB2 IKBKB" style="cursor: pointer; text-decoration: underline dotted;">6 substrates
15	AKT1	1.306e-08	0	0	" title="Overlapping EnrichrSubstrates" data-content="AKT1 targets 13 genes from the input gene list.The full list of substrates is available below:SOX2 MYC JUN FOSL2 CDKN1A IKBKB NCOR1 CDKN2A STAT3 SMAD3 SP1 CHUK MAPK1" style="cursor: pointer; text-decoration: underline dotted;">13 substrates
16	ERK2	1.369e-08	0	0	" title="Overlapping EnrichrSubstrates" data-content="ERK2 targets 10 genes from the input gene list.The full list of substrates is available below:RB1 MYC SMAD2 JUN SMAD3 NFKB1 SP1 CEBPB RELA STAT3" style="cursor: pointer; text-decoration: underline dotted;">10 substrates
17	ABL1	2.687e-08	0	0	" title="Overlapping EnrichrSubstrates" data-content="ABL1 targets 10 genes from the input gene list.The full list of substrates is available below:RB1 KAT5 MYC TP63 PRKCD JUN CDKN1A CEBPB HDAC2 STAT3" style="cursor: pointer; text-decoration: underline dotted;">10 substrates
18	CK2ALPHA	6.506e-08	0	0	" title="Overlapping EnrichrSubstrates" data-content="CK2ALPHA targets 11 genes from the input gene list.The full list of substrates is available below:RB1 MYC CTR9 JUN RELA SP1 SUMO1 HSP90AA1 HDAC2 HDAC3 PML" style="cursor: pointer; text-decoration: underline dotted;">11 substrates
19	SRC	1.54e-07	0	0	" title="Overlapping EnrichrSubstrates" data-content="SRC targets 14 genes from the input gene list.The full list of substrates is available below:RB1 MYC PRKCD JUN FOSL2 CDKN1A IKBKB STAT3 GTF2I NFKB1 CEBPB KLF4 SMAD3 MAPK1" style="cursor: pointer; text-decoration: underline dotted;">14 substrates
20	TGFBR2	1.928e-07	0	0	" title="Overlapping EnrichrSubstrates" data-content="TGFBR2 targets 7 genes from the input gene list.The full list of substrates is available below:MYC HSP90AA1 SMAD2 SMAD3 NFKB1 PML SP1" style="cursor: pointer; text-decoration: underline dotted;">7 substrates
21	IKKBETA	3.179e-07	0	0	" title="Overlapping EnrichrSubstrates" data-content="IKKBETA targets 6 genes from the input gene list.The full list of substrates is available below:RELA IKBKB CHUK STAT3 NFKB1 NFKB2" style="cursor: pointer; text-decoration: underline dotted;">6 substrates
22	PRKCA	7.698e-07	0	0	" title="Overlapping EnrichrSubstrates" data-content="PRKCA targets 18 genes from the input gene list.The full list of substrates is available below:JUN IKBKB STAT3 PIM1 FBXW7 NFKB1 RELA RB1 MYC FOSL2 CDKN1A NCOR1 CDKN2A CDK9 CEBPB KLF4 SMAD3 MAPK1" style="cursor: pointer; text-decoration: underline dotted;">18 substrates
23	GSK	8.219e-07	0	0	" title="Overlapping EnrichrSubstrates" data-content="GSK targets 5 genes from the input gene list.The full list of substrates is available below:CDKN1A CEBPB RELA MYC NFKB1" style="cursor: pointer; text-decoration: underline dotted;">5 substrates
24	ATM	8.259e-07	0	0	" title="Overlapping EnrichrSubstrates" data-content="ATM targets 10 genes from the input gene list.The full list of substrates is available below:RB1 SOX2 KAT5 TP63 DAXX HIF1A FBXW7 SP1 HSP90AA1 VHL" style="cursor: pointer; text-decoration: underline dotted;">10 substrates
25	JNK2	1.29e-06	0	0	" title="Overlapping EnrichrSubstrates" data-content="JNK2 targets 5 genes from the input gene list.The full list of substrates is available below:RB1 RELA MYC SMAD2 JUN" style="cursor: pointer; text-decoration: underline dotted;">5 substrates
26	PKBALPHA	2.607e-06	0	0	" title="Overlapping EnrichrSubstrates" data-content="PKBALPHA targets 9 genes from the input gene list.The full list of substrates is available below:MYC CDKN1A IKBKB RELA SMAD2 SMAD3 NFKB1 HSP90AA1 CHUK" style="cursor: pointer; text-decoration: underline dotted;">9 substrates
27	PRKDC	2.828e-06	0	0	" title="Overlapping EnrichrSubstrates" data-content="PRKDC targets 7 genes from the input gene list.The full list of substrates is available below:MYC NFKB1 NFKB2 CDKN1A HSP90AA1 RELA MAPK8" style="cursor: pointer; text-decoration: underline dotted;">7 substrates
28	CDC2	3.105e-06	0	0	" title="Overlapping EnrichrSubstrates" data-content="CDC2 targets 10 genes from the input gene list.The full list of substrates is available below:RB1 KAT5 MYC RAD21 JUN CDKN1A NCOR1 RELA STAT3 GTF2I" style="cursor: pointer; text-decoration: underline dotted;">10 substrates
29	PRKACA	4.681e-06	0	0	" title="Overlapping EnrichrSubstrates" data-content="PRKACA targets 18 genes from the input gene list.The full list of substrates is available below:JUN STAT3 NFKB1 PIN1 HSP90AA1 RELA RB1 MYC HIF1A FOSL2 CDKN1A NCOR1 CDKN2A GTF2I CEBPB KLF4 SMAD3 MAPK1" style="cursor: pointer; text-decoration: underline dotted;">18 substrates
30	PKR	5.019e-06	0	0	" title="Overlapping EnrichrSubstrates" data-content="PKR targets 5 genes from the input gene list.The full list of substrates is available below:IKBKB HSP90AA1 CHUK STAT3 NFKB1" style="cursor: pointer; text-decoration: underline dotted;">5 substrates
31	PKCIOTA	6.189e-06	0	0	" title="Overlapping EnrichrSubstrates" data-content="PKCIOTA targets 5 genes from the input gene list.The full list of substrates is available below:RELA IKBKB HSP90AA1 CHUK NFKB1" style="cursor: pointer; text-decoration: underline dotted;">5 substrates
32	PRKCZ	7.806e-06	0	0	" title="Overlapping EnrichrSubstrates" data-content="PRKCZ targets 6 genes from the input gene list.The full list of substrates is available below:IKBKB RELA MAPK1 STAT3 SP1 PIN1" style="cursor: pointer; text-decoration: underline dotted;">6 substrates
33	CHUK	8.33e-06	0	0	" title="Overlapping EnrichrSubstrates" data-content="CHUK targets 6 genes from the input gene list.The full list of substrates is available below:MYC BTRC NCOR1 RELA NFKB1 NFKB2" style="cursor: pointer; text-decoration: underline dotted;">6 substrates
34	IKK	8.397e-06	0	0	" title="Overlapping EnrichrSubstrates" data-content="IKK targets 3 genes from the input gene list.The full list of substrates is available below:NFKB1 RELA NFKB2" style="cursor: pointer; text-decoration: underline dotted;">3 substrates
35	RAF1	8.485e-06	0	0	" title="Overlapping EnrichrSubstrates" data-content="RAF1 targets 7 genes from the input gene list.The full list of substrates is available below:RB1 MYC PRKCD NFKB1 PIN1 HSP90AA1 MAPK1" style="cursor: pointer; text-decoration: underline dotted;">7 substrates
36	PKCTHETA	1.205e-05	0	0	" title="Overlapping EnrichrSubstrates" data-content="PKCTHETA targets 5 genes from the input gene list.The full list of substrates is available below:IKBKB CHUK PRKCD MAPK8 MAPK1" style="cursor: pointer; text-decoration: underline dotted;">5 substrates
37	GSK3BETA	1.669e-05	0	0	" title="Overlapping EnrichrSubstrates" data-content="GSK3BETA targets 7 genes from the input gene list.The full list of substrates is available below:MYC JUN SMAD3 NFKB1 PIN1 CEBPB STAT3" style="cursor: pointer; text-decoration: underline dotted;">7 substrates
38	PKBGAMMA	2.507e-05	0	0	" title="Overlapping EnrichrSubstrates" data-content="PKBGAMMA targets 4 genes from the input gene list.The full list of substrates is available below:CDKN1A RELA CHUK NFKB1" style="cursor: pointer; text-decoration: underline dotted;">4 substrates
39	CK2A2	2.914e-05	0	0	" title="Overlapping EnrichrSubstrates" data-content="CK2A2 targets 5 genes from the input gene list.The full list of substrates is available below:MYC HSP90AA1 HDAC2 RELA JUN" style="cursor: pointer; text-decoration: underline dotted;">5 substrates
40	PKCEPSILON	9.731e-05	0	0	" title="Overlapping EnrichrSubstrates" data-content="PKCEPSILON targets 5 genes from the input gene list.The full list of substrates is available below:HSP90AA1 PRKCD MAPK1 NFKB1 SP1" style="cursor: pointer; text-decoration: underline dotted;">5 substrates
41	IKBKB	0.0001485	0	0	" title="Overlapping EnrichrSubstrates" data-content="IKBKB targets 5 genes from the input gene list.The full list of substrates is available below:IKBKB TP63 RELA CDKN2A NFKB1" style="cursor: pointer; text-decoration: underline dotted;">5 substrates
42	PRKCD	0.0001498	0	0	" title="Overlapping EnrichrSubstrates" data-content="PRKCD targets 6 genes from the input gene list.The full list of substrates is available below:PRKCD JUN CDKN1A MAPK8 MAPK1 STAT3" style="cursor: pointer; text-decoration: underline dotted;">6 substrates
43	PKBBETA	0.0001615	0	0	" title="Overlapping EnrichrSubstrates" data-content="PKBBETA targets 4 genes from the input gene list.The full list of substrates is available below:CDKN1A RELA CHUK NFKB1" style="cursor: pointer; text-decoration: underline dotted;">4 substrates
44	RPS6KA3	0.0001749	0	0	" title="Overlapping EnrichrSubstrates" data-content="RPS6KA3 targets 8 genes from the input gene list.The full list of substrates is available below:MYC JUN CDKN1A KAT2B CDKN2A STAT3 SMAD3 CHUK" style="cursor: pointer; text-decoration: underline dotted;">8 substrates
45	CHEK1	0.0001886	0	0	" title="Overlapping EnrichrSubstrates" data-content="CHEK1 targets 7 genes from the input gene list.The full list of substrates is available below:RB1 SOX2 MYC CTR9 CDKN1A NELFE NFKB1" style="cursor: pointer; text-decoration: underline dotted;">7 substrates
46	MAPK10	0.000285	0	0	" title="Overlapping EnrichrSubstrates" data-content="MAPK10 targets 4 genes from the input gene list.The full list of substrates is available below:CDKN1A MYC JUN CDKN2A" style="cursor: pointer; text-decoration: underline dotted;">4 substrates
47	MOK	0.0005056	0	0	" title="Overlapping EnrichrSubstrates" data-content="MOK targets 3 genes from the input gene list.The full list of substrates is available below:MYC JUN NFKB1" style="cursor: pointer; text-decoration: underline dotted;">3 substrates
48	CK2	0.0005801	0	0	" title="Overlapping EnrichrSubstrates" data-content="CK2 targets 4 genes from the input gene list.The full list of substrates is available below:HSP90AA1 HDAC2 RELA JUN" style="cursor: pointer; text-decoration: underline dotted;">4 substrates
49	ATR	0.0006018	0	0	" title="Overlapping EnrichrSubstrates" data-content="ATR targets 5 genes from the input gene list.The full list of substrates is available below:DAXX CDK9 SP1 CDKN2A PML" style="cursor: pointer; text-decoration: underline dotted;">5 substrates
50	CDK6	0.0006785	0	0	" title="Overlapping EnrichrSubstrates" data-content="CDK6 targets 3 genes from the input gene list.The full list of substrates is available below:RB1 CEBPA CDKN1A" style="cursor: pointer; text-decoration: underline dotted;">3 substrates
51	PDHK1	0.0006788	0	0	" title="Overlapping EnrichrSubstrates" data-content="PDHK1 targets 4 genes from the input gene list.The full list of substrates is available below:IKBKB HSP90AA1 CHUK PRKCD" style="cursor: pointer; text-decoration: underline dotted;">4 substrates
52	MAP2K1	0.0007509	0	0	" title="Overlapping EnrichrSubstrates" data-content="MAP2K1 targets 4 genes from the input gene list.The full list of substrates is available below:MYC MAPK8 MAPK1 STAT3" style="cursor: pointer; text-decoration: underline dotted;">4 substrates
53	CDK3	0.0008124	0	0	" title="Overlapping EnrichrSubstrates" data-content="CDK3 targets 3 genes from the input gene list.The full list of substrates is available below:RB1 CDKN1A JUN" style="cursor: pointer; text-decoration: underline dotted;">3 substrates
54	CDK9	0.001043	0	0	" title="Overlapping EnrichrSubstrates" data-content="CDK9 targets 3 genes from the input gene list.The full list of substrates is available below:RB1 SMAD3 CDK9" style="cursor: pointer; text-decoration: underline dotted;">3 substrates
55	CSNK2A2	0.001097	0	0	" title="Overlapping EnrichrSubstrates" data-content="CSNK2A2 targets 5 genes from the input gene list.The full list of substrates is available below:SOX2 MYC JUN CDKN1A NELFE" style="cursor: pointer; text-decoration: underline dotted;">5 substrates
56	MAP3K5	0.001128	0	0	" title="Overlapping EnrichrSubstrates" data-content="MAP3K5 targets 3 genes from the input gene list.The full list of substrates is available below:CDKN1A MAPK8 DAXX" style="cursor: pointer; text-decoration: underline dotted;">3 substrates
57	DNA	0.00128	0	0	" title="Overlapping EnrichrSubstrates" data-content="DNA targets 2 genes from the input gene list.The full list of substrates is available below:HSP90AA1 JUN" style="cursor: pointer; text-decoration: underline dotted;">2 substrates
58	RET	0.001311	0	0	" title="Overlapping EnrichrSubstrates" data-content="RET targets 3 genes from the input gene list.The full list of substrates is available below:MAPK8 MAPK1 STAT3" style="cursor: pointer; text-decoration: underline dotted;">3 substrates
59	ALK	0.001311	0	0	" title="Overlapping EnrichrSubstrates" data-content="ALK targets 3 genes from the input gene list.The full list of substrates is available below:RELA HSP90AA1 STAT3" style="cursor: pointer; text-decoration: underline dotted;">3 substrates
60	DYRK2	0.001512	0	0	" title="Overlapping EnrichrSubstrates" data-content="DYRK2 targets 3 genes from the input gene list.The full list of substrates is available below:MYC JUN STAT3" style="cursor: pointer; text-decoration: underline dotted;">3 substrates
61	MAPK9	0.001598	0	0	" title="Overlapping EnrichrSubstrates" data-content="MAPK9 targets 4 genes from the input gene list.The full list of substrates is available below:CDKN1A MYC JUN STAT3" style="cursor: pointer; text-decoration: underline dotted;">4 substrates
62	CHEK2	0.002802	0	0	" title="Overlapping EnrichrSubstrates" data-content="CHEK2 targets 3 genes from the input gene list.The full list of substrates is available below:RB1 VHL PML" style="cursor: pointer; text-decoration: underline dotted;">3 substrates
63	GSK3A	0.002958	0	0	" title="Overlapping EnrichrSubstrates" data-content="GSK3A targets 3 genes from the input gene list.The full list of substrates is available below:MYC CEBPA CEBPB" style="cursor: pointer; text-decoration: underline dotted;">3 substrates
64	GSK3ALPHA	0.00312	0	0	" title="Overlapping EnrichrSubstrates" data-content="GSK3ALPHA targets 3 genes from the input gene list.The full list of substrates is available below:MYC JUN NFKB1" style="cursor: pointer; text-decoration: underline dotted;">3 substrates
65	JAK2	0.003288	0	0	" title="Overlapping EnrichrSubstrates" data-content="JAK2 targets 3 genes from the input gene list.The full list of substrates is available below:GTF2I MAPK1 STAT3" style="cursor: pointer; text-decoration: underline dotted;">3 substrates
66	ACTR2B	0.003344	0	0	" title="Overlapping EnrichrSubstrates" data-content="ACTR2B targets 2 genes from the input gene list.The full list of substrates is available below:SMAD2 SMAD3" style="cursor: pointer; text-decoration: underline dotted;">2 substrates
67	PIM1	0.003461	0	0	" title="Overlapping EnrichrSubstrates" data-content="PIM1 targets 3 genes from the input gene list.The full list of substrates is available below:CDKN1A MYC RELA" style="cursor: pointer; text-decoration: underline dotted;">3 substrates
68	CDK5	0.003756	0	0	" title="Overlapping EnrichrSubstrates" data-content="CDK5 targets 5 genes from the input gene list.The full list of substrates is available below:RB1 MYC HIF1A CDKN1A STAT3" style="cursor: pointer; text-decoration: underline dotted;">5 substrates
69	EGFR	0.004013	0	0	" title="Overlapping EnrichrSubstrates" data-content="EGFR targets 5 genes from the input gene list.The full list of substrates is available below:PRKCD JUN CDKN1A HSP90AA1 STAT3" style="cursor: pointer; text-decoration: underline dotted;">5 substrates
70	MAPK11	0.004672	0	0	" title="Overlapping EnrichrSubstrates" data-content="MAPK11 targets 4 genes from the input gene list.The full list of substrates is available below:JUN NFKB1 CEBPB PML" style="cursor: pointer; text-decoration: underline dotted;">4 substrates
71	PKD1	0.005046	0	0	" title="Overlapping EnrichrSubstrates" data-content="PKD1 targets 3 genes from the input gene list.The full list of substrates is available below:MAPK8 JUN NFKB1" style="cursor: pointer; text-decoration: underline dotted;">3 substrates
72	MAP3K8	0.005979	0	0	" title="Overlapping EnrichrSubstrates" data-content="MAP3K8 targets 3 genes from the input gene list.The full list of substrates is available below:PIM1 HSP90AA1 MAPK1" style="cursor: pointer; text-decoration: underline dotted;">3 substrates
73	SGK1	0.005979	0	0	" title="Overlapping EnrichrSubstrates" data-content="SGK1 targets 3 genes from the input gene list.The full list of substrates is available below:IKBKB FBXW7 MAPK1" style="cursor: pointer; text-decoration: underline dotted;">3 substrates
74	TYK2	0.008136	0	0	" title="Overlapping EnrichrSubstrates" data-content="TYK2 targets 3 genes from the input gene list.The full list of substrates is available below:STAT3 NFKB1 NFKB2" style="cursor: pointer; text-decoration: underline dotted;">3 substrates
75	PAK2	0.009049	0	0	" title="Overlapping EnrichrSubstrates" data-content="PAK2 targets 3 genes from the input gene list.The full list of substrates is available below:MYC SMAD2 JUN" style="cursor: pointer; text-decoration: underline dotted;">3 substrates
76	PIM2	0.009415	0	0	" title="Overlapping EnrichrSubstrates" data-content="PIM2 targets 2 genes from the input gene list.The full list of substrates is available below:CDKN1A MYC" style="cursor: pointer; text-decoration: underline dotted;">2 substrates
77	TBK1	0.01002	0	0	" title="Overlapping EnrichrSubstrates" data-content="TBK1 targets 3 genes from the input gene list.The full list of substrates is available below:IKBKB RELA STAT3" style="cursor: pointer; text-decoration: underline dotted;">3 substrates
78	PRKCE	0.01036	0	0	" title="Overlapping EnrichrSubstrates" data-content="PRKCE targets 3 genes from the input gene list.The full list of substrates is available below:IKBKB FBXW7 STAT3" style="cursor: pointer; text-decoration: underline dotted;">3 substrates
79	IKBKE	0.01036	0	0	" title="Overlapping EnrichrSubstrates" data-content="IKBKE targets 3 genes from the input gene list.The full list of substrates is available below:BTRC RELA NFKB1" style="cursor: pointer; text-decoration: underline dotted;">3 substrates
80	RPS6KA1	0.01036	0	0	" title="Overlapping EnrichrSubstrates" data-content="RPS6KA1 targets 3 genes from the input gene list.The full list of substrates is available below:CEBPB MAPK1 JUN" style="cursor: pointer; text-decoration: underline dotted;">3 substrates
81	CSNK1A1	0.0107	0	0	" title="Overlapping EnrichrSubstrates" data-content="CSNK1A1 targets 3 genes from the input gene list.The full list of substrates is available below:CDKN1A RELA VHL" style="cursor: pointer; text-decoration: underline dotted;">3 substrates
82	MELK	0.01082	0	0	" title="Overlapping EnrichrSubstrates" data-content="MELK targets 2 genes from the input gene list.The full list of substrates is available below:SMAD2 SMAD3" style="cursor: pointer; text-decoration: underline dotted;">2 substrates
83	AURKA	0.0114	0	0	" title="Overlapping EnrichrSubstrates" data-content="AURKA targets 3 genes from the input gene list.The full list of substrates is available below:CDKN1A VHL PIN1" style="cursor: pointer; text-decoration: underline dotted;">3 substrates
84	CDK8	0.01155	0	0	" title="Overlapping EnrichrSubstrates" data-content="CDK8 targets 2 genes from the input gene list.The full list of substrates is available below:SMAD3 STAT3" style="cursor: pointer; text-decoration: underline dotted;">2 substrates
85	CK1ALPHA	0.01251	0	0	" title="Overlapping EnrichrSubstrates" data-content="CK1ALPHA targets 3 genes from the input gene list.The full list of substrates is available below:RB1 JUN NFKB1" style="cursor: pointer; text-decoration: underline dotted;">3 substrates
86	EIF2AK2	0.01469	0	0	" title="Overlapping EnrichrSubstrates" data-content="EIF2AK2 targets 2 genes from the input gene list.The full list of substrates is available below:IKBKB CHUK" style="cursor: pointer; text-decoration: underline dotted;">2 substrates
87	MAP3K7	0.01755	0	0	" title="Overlapping EnrichrSubstrates" data-content="MAP3K7 targets 3 genes from the input gene list.The full list of substrates is available below:SMAD3 IKBKB HSP90AA1" style="cursor: pointer; text-decoration: underline dotted;">3 substrates
88	PLK1	0.01843	0	0	" title="Overlapping EnrichrSubstrates" data-content="PLK1 targets 5 genes from the input gene list.The full list of substrates is available below:MYC RAD21 CDKN1A IKBKB PIN1" style="cursor: pointer; text-decoration: underline dotted;">5 substrates
89	PLK3	0.02096	0	0	" title="Overlapping EnrichrSubstrates" data-content="PLK3 targets 2 genes from the input gene list.The full list of substrates is available below:HIF1A JUN" style="cursor: pointer; text-decoration: underline dotted;">2 substrates
90	PDGFRBETA	0.02193	0	0	" title="Overlapping EnrichrSubstrates" data-content="PDGFRBETA targets 2 genes from the input gene list.The full list of substrates is available below:PRKCD STAT3" style="cursor: pointer; text-decoration: underline dotted;">2 substrates
91	RPS6KA5	0.02292	0	0	" title="Overlapping EnrichrSubstrates" data-content="RPS6KA5 targets 2 genes from the input gene list.The full list of substrates is available below:RELA STAT3" style="cursor: pointer; text-decoration: underline dotted;">2 substrates
92	ERBB2	0.02357	0	0	" title="Overlapping EnrichrSubstrates" data-content="ERBB2 targets 3 genes from the input gene list.The full list of substrates is available below:HSP90AA1 NCOR1 STAT3" style="cursor: pointer; text-decoration: underline dotted;">3 substrates
93	MTOR	0.02467	0	0	" title="Overlapping EnrichrSubstrates" data-content="MTOR targets 3 genes from the input gene list.The full list of substrates is available below:MYC JUN STAT3" style="cursor: pointer; text-decoration: underline dotted;">3 substrates
94	NLK	0.02707	0	0	" title="Overlapping EnrichrSubstrates" data-content="NLK targets 2 genes from the input gene list.The full list of substrates is available below:FBXW7 STAT3" style="cursor: pointer; text-decoration: underline dotted;">2 substrates
95	PRKCI	0.03036	0	0	" title="Overlapping EnrichrSubstrates" data-content="PRKCI targets 2 genes from the input gene list.The full list of substrates is available below:FBXW7 SP1" style="cursor: pointer; text-decoration: underline dotted;">2 substrates
96	MAP2K3	0.03036	0	0	" title="Overlapping EnrichrSubstrates" data-content="MAP2K3 targets 2 genes from the input gene list.The full list of substrates is available below:SMAD2 SMAD3" style="cursor: pointer; text-decoration: underline dotted;">2 substrates
97	PKM	0.03239	0	0	" title="Overlapping EnrichrSubstrates" data-content="PKM targets 1 genes from the input gene list.The full list of substrates is available below:STAT3" style="cursor: pointer; text-decoration: underline dotted;">1 substrates
98	CAMK2A	0.03248	0	0	" title="Overlapping EnrichrSubstrates" data-content="CAMK2A targets 3 genes from the input gene list.The full list of substrates is available below:MYC SMAD2 CDKN1A" style="cursor: pointer; text-decoration: underline dotted;">3 substrates
99	MAP2K4	0.0338	0	0	" title="Overlapping EnrichrSubstrates" data-content="MAP2K4 targets 2 genes from the input gene list.The full list of substrates is available below:DAXX MAPK8" style="cursor: pointer; text-decoration: underline dotted;">2 substrates
100	MAP3K14	0.03445	0	0	" title="Overlapping EnrichrSubstrates" data-content="MAP3K14 targets 3 genes from the input gene list.The full list of substrates is available below:NFKB2 IKBKB CHUK" style="cursor: pointer; text-decoration: underline dotted;">3 substrates
101	PKCALPHA	0.03648	0	0	" title="Overlapping EnrichrSubstrates" data-content="PKCALPHA targets 3 genes from the input gene list.The full list of substrates is available below:MYC PRKCD NFKB1" style="cursor: pointer; text-decoration: underline dotted;">3 substrates
102	NIK	0.03769	0	0	" title="Overlapping EnrichrSubstrates" data-content="NIK targets 1 genes from the input gene list.The full list of substrates is available below:CEBPB" style="cursor: pointer; text-decoration: underline dotted;">1 substrates
103	PKAGAMMA	0.04239	0	0	" title="Overlapping EnrichrSubstrates" data-content="PKAGAMMA targets 2 genes from the input gene list.The full list of substrates is available below:RELA NFKB1" style="cursor: pointer; text-decoration: underline dotted;">2 substrates
104	RSK	0.04296	0	0	" title="Overlapping EnrichrSubstrates" data-content="RSK targets 1 genes from the input gene list.The full list of substrates is available below:CEBPB" style="cursor: pointer; text-decoration: underline dotted;">1 substrates
105	RSK3	0.04296	0	0	" title="Overlapping EnrichrSubstrates" data-content="RSK3 targets 1 genes from the input gene list.The full list of substrates is available below:MAPK1" style="cursor: pointer; text-decoration: underline dotted;">1 substrates
106	TGFBR1	0.04498	0	0	" title="Overlapping EnrichrSubstrates" data-content="TGFBR1 targets 2 genes from the input gene list.The full list of substrates is available below:TP63 SMAD2" style="cursor: pointer; text-decoration: underline dotted;">2 substrates
107	CSNK1E	0.04629	0	0	" title="Overlapping EnrichrSubstrates" data-content="CSNK1E targets 2 genes from the input gene list.The full list of substrates is available below:MYC CDKN2A" style="cursor: pointer; text-decoration: underline dotted;">2 substrates
108	PRKCQ	0.05308	0	0	" title="Overlapping EnrichrSubstrates" data-content="PRKCQ targets 2 genes from the input gene list.The full list of substrates is available below:IKBKB CHUK" style="cursor: pointer; text-decoration: underline dotted;">2 substrates
109	PRKG1	0.05308	0	0	" title="Overlapping EnrichrSubstrates" data-content="PRKG1 targets 2 genes from the input gene list.The full list of substrates is available below:CDKN1A GTF2I" style="cursor: pointer; text-decoration: underline dotted;">2 substrates
110	AURKB	0.05402	0	0	" title="Overlapping EnrichrSubstrates" data-content="AURKB targets 3 genes from the input gene list.The full list of substrates is available below:RB1 PIN1 NELFE" style="cursor: pointer; text-decoration: underline dotted;">3 substrates
111	BTK	0.05448	0	0	" title="Overlapping EnrichrSubstrates" data-content="BTK targets 2 genes from the input gene list.The full list of substrates is available below:GTF2I JUN" style="cursor: pointer; text-decoration: underline dotted;">2 substrates
112	RPS6KB1	0.05589	0	0	" title="Overlapping EnrichrSubstrates" data-content="RPS6KB1 targets 2 genes from the input gene list.The full list of substrates is available below:TP63 CDKN2A" style="cursor: pointer; text-decoration: underline dotted;">2 substrates
113	LYN	0.05656	0	0	" title="Overlapping EnrichrSubstrates" data-content="LYN targets 3 genes from the input gene list.The full list of substrates is available below:MYC PRKCD IKBKB" style="cursor: pointer; text-decoration: underline dotted;">3 substrates
114	PKC	0.0586	0	0	" title="Overlapping EnrichrSubstrates" data-content="PKC targets 1 genes from the input gene list.The full list of substrates is available below:RELA" style="cursor: pointer; text-decoration: underline dotted;">1 substrates
115	CAMKIV	0.0586	0	0	" title="Overlapping EnrichrSubstrates" data-content="CAMKIV targets 1 genes from the input gene list.The full list of substrates is available below:RELA" style="cursor: pointer; text-decoration: underline dotted;">1 substrates
116	JNK3	0.06376	0	0	" title="Overlapping EnrichrSubstrates" data-content="JNK3 targets 1 genes from the input gene list.The full list of substrates is available below:JUN" style="cursor: pointer; text-decoration: underline dotted;">1 substrates
117	CDK7	0.06613	0	0	" title="Overlapping EnrichrSubstrates" data-content="CDK7 targets 2 genes from the input gene list.The full list of substrates is available below:CTR9 CDK9" style="cursor: pointer; text-decoration: underline dotted;">2 substrates
118	BRD2	0.06889	0	0	" title="Overlapping EnrichrSubstrates" data-content="BRD2 targets 1 genes from the input gene list.The full list of substrates is available below:RB1" style="cursor: pointer; text-decoration: underline dotted;">1 substrates
119	ADRBK1	0.06889	0	0	" title="Overlapping EnrichrSubstrates" data-content="ADRBK1 targets 1 genes from the input gene list.The full list of substrates is available below:PRKCD" style="cursor: pointer; text-decoration: underline dotted;">1 substrates
120	BARK1	0.06916	0	0	" title="Overlapping EnrichrSubstrates" data-content="BARK1 targets 2 genes from the input gene list.The full list of substrates is available below:PRKCD PIN1" style="cursor: pointer; text-decoration: underline dotted;">2 substrates
121	AURORAA	0.07694	0	0	" title="Overlapping EnrichrSubstrates" data-content="AURORAA targets 2 genes from the input gene list.The full list of substrates is available below:NCOR1 HDAC3" style="cursor: pointer; text-decoration: underline dotted;">2 substrates
122	PKC	0.08411	0	0	" title="Overlapping EnrichrSubstrates" data-content="PKC targets 1 genes from the input gene list.The full list of substrates is available below:STAT3" style="cursor: pointer; text-decoration: underline dotted;">1 substrates
123	PDK	0.104	0	0	" title="Overlapping EnrichrSubstrates" data-content="PDK targets 1 genes from the input gene list.The full list of substrates is available below:PRKCD" style="cursor: pointer; text-decoration: underline dotted;">1 substrates
124	PKCETA	0.104	0	0	" title="Overlapping EnrichrSubstrates" data-content="PKCETA targets 1 genes from the input gene list.The full list of substrates is available below:PRKCD" style="cursor: pointer; text-decoration: underline dotted;">1 substrates
125	MINK1	0.104	0	0	" title="Overlapping EnrichrSubstrates" data-content="MINK1 targets 1 genes from the input gene list.The full list of substrates is available below:SMAD2" style="cursor: pointer; text-decoration: underline dotted;">1 substrates
126	PRKCB	0.1068	0	0	" title="Overlapping EnrichrSubstrates" data-content="PRKCB targets 3 genes from the input gene list.The full list of substrates is available below:JUN CDKN1A STAT3" style="cursor: pointer; text-decoration: underline dotted;">3 substrates
127	DMPK	0.109	0	0	" title="Overlapping EnrichrSubstrates" data-content="DMPK targets 1 genes from the input gene list.The full list of substrates is available below:SP1" style="cursor: pointer; text-decoration: underline dotted;">1 substrates
128	PKA	0.109	0	0	" title="Overlapping EnrichrSubstrates" data-content="PKA targets 1 genes from the input gene list.The full list of substrates is available below:RELA" style="cursor: pointer; text-decoration: underline dotted;">1 substrates
129	PIM3	0.1138	0	0	" title="Overlapping EnrichrSubstrates" data-content="PIM3 targets 1 genes from the input gene list.The full list of substrates is available below:PML" style="cursor: pointer; text-decoration: underline dotted;">1 substrates
130	PNCK	0.1138	0	0	" title="Overlapping EnrichrSubstrates" data-content="PNCK targets 1 genes from the input gene list.The full list of substrates is available below:HSP90AA1" style="cursor: pointer; text-decoration: underline dotted;">1 substrates
131	MAPK15	0.1138	0	0	" title="Overlapping EnrichrSubstrates" data-content="MAPK15 targets 1 genes from the input gene list.The full list of substrates is available below:JUN" style="cursor: pointer; text-decoration: underline dotted;">1 substrates
132	HIPK1	0.1187	0	0	" title="Overlapping EnrichrSubstrates" data-content="HIPK1 targets 1 genes from the input gene list.The full list of substrates is available below:DAXX" style="cursor: pointer; text-decoration: underline dotted;">1 substrates
133	MAP3K6	0.1187	0	0	" title="Overlapping EnrichrSubstrates" data-content="MAP3K6 targets 1 genes from the input gene list.The full list of substrates is available below:MAPK8" style="cursor: pointer; text-decoration: underline dotted;">1 substrates
134	WEE1	0.1187	0	0	" title="Overlapping EnrichrSubstrates" data-content="WEE1 targets 1 genes from the input gene list.The full list of substrates is available below:HSP90AA1" style="cursor: pointer; text-decoration: underline dotted;">1 substrates
135	CSNK1G1	0.1235	0	0	" title="Overlapping EnrichrSubstrates" data-content="CSNK1G1 targets 1 genes from the input gene list.The full list of substrates is available below:RELA" style="cursor: pointer; text-decoration: underline dotted;">1 substrates
136	MAP3K11	0.1235	0	0	" title="Overlapping EnrichrSubstrates" data-content="MAP3K11 targets 1 genes from the input gene list.The full list of substrates is available below:PIN1" style="cursor: pointer; text-decoration: underline dotted;">1 substrates
137	MERTK	0.1235	0	0	" title="Overlapping EnrichrSubstrates" data-content="MERTK targets 1 genes from the input gene list.The full list of substrates is available below:STAT3" style="cursor: pointer; text-decoration: underline dotted;">1 substrates
138	DYRK3	0.1235	0	0	" title="Overlapping EnrichrSubstrates" data-content="DYRK3 targets 1 genes from the input gene list.The full list of substrates is available below:SIRT1" style="cursor: pointer; text-decoration: underline dotted;">1 substrates
139	RIPK3	0.1267	0	0	" title="Overlapping EnrichrSubstrates" data-content="RIPK3 targets 2 genes from the input gene list.The full list of substrates is available below:DAXX HSP90AA1" style="cursor: pointer; text-decoration: underline dotted;">2 substrates
140	PBK	0.1283	0	0	" title="Overlapping EnrichrSubstrates" data-content="PBK targets 1 genes from the input gene list.The full list of substrates is available below:JUN" style="cursor: pointer; text-decoration: underline dotted;">1 substrates
141	MYLK2	0.1283	0	0	" title="Overlapping EnrichrSubstrates" data-content="MYLK2 targets 1 genes from the input gene list.The full list of substrates is available below:NFKB2" style="cursor: pointer; text-decoration: underline dotted;">1 substrates
142	RPS6KA4	0.1283	0	0	" title="Overlapping EnrichrSubstrates" data-content="RPS6KA4 targets 1 genes from the input gene list.The full list of substrates is available below:RELA" style="cursor: pointer; text-decoration: underline dotted;">1 substrates
143	NUAK1	0.1283	0	0	" title="Overlapping EnrichrSubstrates" data-content="NUAK1 targets 1 genes from the input gene list.The full list of substrates is available below:CDKN1A" style="cursor: pointer; text-decoration: underline dotted;">1 substrates
144	PKAALPHA	0.1303	0	0	" title="Overlapping EnrichrSubstrates" data-content="PKAALPHA targets 2 genes from the input gene list.The full list of substrates is available below:NFKB1 RELA" style="cursor: pointer; text-decoration: underline dotted;">2 substrates
145	NEK1	0.1331	0	0	" title="Overlapping EnrichrSubstrates" data-content="NEK1 targets 1 genes from the input gene list.The full list of substrates is available below:VHL" style="cursor: pointer; text-decoration: underline dotted;">1 substrates
146	MARK3	0.1331	0	0	" title="Overlapping EnrichrSubstrates" data-content="MARK3 targets 1 genes from the input gene list.The full list of substrates is available below:RAD21" style="cursor: pointer; text-decoration: underline dotted;">1 substrates
147	VRK1	0.1379	0	0	" title="Overlapping EnrichrSubstrates" data-content="VRK1 targets 1 genes from the input gene list.The full list of substrates is available below:JUN" style="cursor: pointer; text-decoration: underline dotted;">1 substrates
148	AKT3	0.1473	0	0	" title="Overlapping EnrichrSubstrates" data-content="AKT3 targets 1 genes from the input gene list.The full list of substrates is available below:PRKCD" style="cursor: pointer; text-decoration: underline dotted;">1 substrates
149	IRAK1	0.1473	0	0	" title="Overlapping EnrichrSubstrates" data-content="IRAK1 targets 1 genes from the input gene list.The full list of substrates is available below:STAT3" style="cursor: pointer; text-decoration: underline dotted;">1 substrates
150	DYRK1B	0.152	0	0	" title="Overlapping EnrichrSubstrates" data-content="DYRK1B targets 1 genes from the input gene list.The full list of substrates is available below:CDKN1A" style="cursor: pointer; text-decoration: underline dotted;">1 substrates
151	BMX	0.152	0	0	" title="Overlapping EnrichrSubstrates" data-content="BMX targets 1 genes from the input gene list.The full list of substrates is available below:PIM1" style="cursor: pointer; text-decoration: underline dotted;">1 substrates
152	UHMK1	0.152	0	0	" title="Overlapping EnrichrSubstrates" data-content="UHMK1 targets 1 genes from the input gene list.The full list of substrates is available below:SMAD2" style="cursor: pointer; text-decoration: underline dotted;">1 substrates
153	CAMK4	0.152	0	0	" title="Overlapping EnrichrSubstrates" data-content="CAMK4 targets 1 genes from the input gene list.The full list of substrates is available below:RELA" style="cursor: pointer; text-decoration: underline dotted;">1 substrates
154	GRK2	0.152	0	0	" title="Overlapping EnrichrSubstrates" data-content="GRK2 targets 1 genes from the input gene list.The full list of substrates is available below:SMAD2" style="cursor: pointer; text-decoration: underline dotted;">1 substrates
155	MAPK7	0.152	0	0	" title="Overlapping EnrichrSubstrates" data-content="MAPK7 targets 1 genes from the input gene list.The full list of substrates is available below:PML" style="cursor: pointer; text-decoration: underline dotted;">1 substrates
156	PRKACB	0.1567	0	0	" title="Overlapping EnrichrSubstrates" data-content="PRKACB targets 1 genes from the input gene list.The full list of substrates is available below:CDKN1A" style="cursor: pointer; text-decoration: underline dotted;">1 substrates
157	EEF2K	0.1567	0	0	" title="Overlapping EnrichrSubstrates" data-content="EEF2K targets 1 genes from the input gene list.The full list of substrates is available below:MAPK8" style="cursor: pointer; text-decoration: underline dotted;">1 substrates
158	LATS2	0.1567	0	0	" title="Overlapping EnrichrSubstrates" data-content="LATS2 targets 1 genes from the input gene list.The full list of substrates is available below:CDKN1A" style="cursor: pointer; text-decoration: underline dotted;">1 substrates
159	NEK6	0.1613	0	0	" title="Overlapping EnrichrSubstrates" data-content="NEK6 targets 1 genes from the input gene list.The full list of substrates is available below:STAT3" style="cursor: pointer; text-decoration: underline dotted;">1 substrates
160	AXL	0.1613	0	0	" title="Overlapping EnrichrSubstrates" data-content="AXL targets 1 genes from the input gene list.The full list of substrates is available below:STAT3" style="cursor: pointer; text-decoration: underline dotted;">1 substrates
161	FER	0.1613	0	0	" title="Overlapping EnrichrSubstrates" data-content="FER targets 1 genes from the input gene list.The full list of substrates is available below:STAT3" style="cursor: pointer; text-decoration: underline dotted;">1 substrates
162	DAPK1	0.1659	0	0	" title="Overlapping EnrichrSubstrates" data-content="DAPK1 targets 1 genes from the input gene list.The full list of substrates is available below:PIN1" style="cursor: pointer; text-decoration: underline dotted;">1 substrates
163	PLK2	0.1659	0	0	" title="Overlapping EnrichrSubstrates" data-content="PLK2 targets 1 genes from the input gene list.The full list of substrates is available below:FBXW7" style="cursor: pointer; text-decoration: underline dotted;">1 substrates
164	YES1	0.1659	0	0	" title="Overlapping EnrichrSubstrates" data-content="YES1 targets 1 genes from the input gene list.The full list of substrates is available below:PRKCD" style="cursor: pointer; text-decoration: underline dotted;">1 substrates
165	EPHB1	0.1705	0	0	" title="Overlapping EnrichrSubstrates" data-content="EPHB1 targets 1 genes from the input gene list.The full list of substrates is available below:STAT3" style="cursor: pointer; text-decoration: underline dotted;">1 substrates
166	BMPR1B	0.1705	0	0	" title="Overlapping EnrichrSubstrates" data-content="BMPR1B targets 1 genes from the input gene list.The full list of substrates is available below:SMAD2" style="cursor: pointer; text-decoration: underline dotted;">1 substrates
167	DAPK3	0.175	0	0	" title="Overlapping EnrichrSubstrates" data-content="DAPK3 targets 1 genes from the input gene list.The full list of substrates is available below:CDKN1A" style="cursor: pointer; text-decoration: underline dotted;">1 substrates
168	CSK	0.175	0	0	" title="Overlapping EnrichrSubstrates" data-content="CSK targets 1 genes from the input gene list.The full list of substrates is available below:PML" style="cursor: pointer; text-decoration: underline dotted;">1 substrates
169	PDGFRB	0.175	0	0	" title="Overlapping EnrichrSubstrates" data-content="PDGFRB targets 1 genes from the input gene list.The full list of substrates is available below:PRKCD" style="cursor: pointer; text-decoration: underline dotted;">1 substrates
170	PKG1CGKI	0.1841	0	0	" title="Overlapping EnrichrSubstrates" data-content="PKG1CGKI targets 1 genes from the input gene list.The full list of substrates is available below:SP1" style="cursor: pointer; text-decoration: underline dotted;">1 substrates
171	ARAF	0.193	0	0	" title="Overlapping EnrichrSubstrates" data-content="ARAF targets 1 genes from the input gene list.The full list of substrates is available below:PRKCD" style="cursor: pointer; text-decoration: underline dotted;">1 substrates
172	MAP3K1	0.1998	0	0	" title="Overlapping EnrichrSubstrates" data-content="MAP3K1 targets 2 genes from the input gene list.The full list of substrates is available below:HSP90AA1 STAT3" style="cursor: pointer; text-decoration: underline dotted;">2 substrates
173	MAP2K7	0.2019	0	0	" title="Overlapping EnrichrSubstrates" data-content="MAP2K7 targets 1 genes from the input gene list.The full list of substrates is available below:MAPK8" style="cursor: pointer; text-decoration: underline dotted;">1 substrates
174	PRKAA2	0.2019	0	0	" title="Overlapping EnrichrSubstrates" data-content="PRKAA2 targets 1 genes from the input gene list.The full list of substrates is available below:IKBKB" style="cursor: pointer; text-decoration: underline dotted;">1 substrates
175	KIT	0.2019	0	0	" title="Overlapping EnrichrSubstrates" data-content="KIT targets 1 genes from the input gene list.The full list of substrates is available below:STAT3" style="cursor: pointer; text-decoration: underline dotted;">1 substrates
176	MAP2K2	0.2063	0	0	" title="Overlapping EnrichrSubstrates" data-content="MAP2K2 targets 1 genes from the input gene list.The full list of substrates is available below:MAPK1" style="cursor: pointer; text-decoration: underline dotted;">1 substrates
177	DYRK1A	0.2063	0	0	" title="Overlapping EnrichrSubstrates" data-content="DYRK1A targets 1 genes from the input gene list.The full list of substrates is available below:SIRT1" style="cursor: pointer; text-decoration: underline dotted;">1 substrates
178	ABL2	0.2063	0	0	" title="Overlapping EnrichrSubstrates" data-content="ABL2 targets 1 genes from the input gene list.The full list of substrates is available below:CEBPB" style="cursor: pointer; text-decoration: underline dotted;">1 substrates
179	RIPK1	0.2106	0	0	" title="Overlapping EnrichrSubstrates" data-content="RIPK1 targets 1 genes from the input gene list.The full list of substrates is available below:PML" style="cursor: pointer; text-decoration: underline dotted;">1 substrates
180	RIPK2	0.2193	0	0	" title="Overlapping EnrichrSubstrates" data-content="RIPK2 targets 1 genes from the input gene list.The full list of substrates is available below:HSP90AA1" style="cursor: pointer; text-decoration: underline dotted;">1 substrates
181	EPHB2	0.2236	0	0	" title="Overlapping EnrichrSubstrates" data-content="EPHB2 targets 1 genes from the input gene list.The full list of substrates is available below:GTF2I" style="cursor: pointer; text-decoration: underline dotted;">1 substrates
182	CSNK1D	0.2236	0	0	" title="Overlapping EnrichrSubstrates" data-content="CSNK1D targets 1 genes from the input gene list.The full list of substrates is available below:HIF1A" style="cursor: pointer; text-decoration: underline dotted;">1 substrates
183	PTK2	0.2279	0	0	" title="Overlapping EnrichrSubstrates" data-content="PTK2 targets 1 genes from the input gene list.The full list of substrates is available below:SUMO1" style="cursor: pointer; text-decoration: underline dotted;">1 substrates
184	PAK3	0.2279	0	0	" title="Overlapping EnrichrSubstrates" data-content="PAK3 targets 1 genes from the input gene list.The full list of substrates is available below:CDKN1A" style="cursor: pointer; text-decoration: underline dotted;">1 substrates
185	PRKCG	0.2321	0	0	" title="Overlapping EnrichrSubstrates" data-content="PRKCG targets 1 genes from the input gene list.The full list of substrates is available below:HSP90AA1" style="cursor: pointer; text-decoration: underline dotted;">1 substrates
186	LCK	0.2341	0	0	" title="Overlapping EnrichrSubstrates" data-content="LCK targets 2 genes from the input gene list.The full list of substrates is available below:PRKCD MAPK1" style="cursor: pointer; text-decoration: underline dotted;">2 substrates
187	FGR	0.2489	0	0	" title="Overlapping EnrichrSubstrates" data-content="FGR targets 1 genes from the input gene list.The full list of substrates is available below:HSP90AA1" style="cursor: pointer; text-decoration: underline dotted;">1 substrates
188	AKT2	0.2853	0	0	" title="Overlapping EnrichrSubstrates" data-content="AKT2 targets 1 genes from the input gene list.The full list of substrates is available below:CHUK" style="cursor: pointer; text-decoration: underline dotted;">1 substrates
189	CAMKIIALPHA	0.2853	0	0	" title="Overlapping EnrichrSubstrates" data-content="CAMKIIALPHA targets 1 genes from the input gene list.The full list of substrates is available below:CEBPB" style="cursor: pointer; text-decoration: underline dotted;">1 substrates
190	PRKD1	0.3349	0	0	" title="Overlapping EnrichrSubstrates" data-content="PRKD1 targets 1 genes from the input gene list.The full list of substrates is available below:JUN" style="cursor: pointer; text-decoration: underline dotted;">1 substrates
191	PKCGAMMA	0.3349	0	0	" title="Overlapping EnrichrSubstrates" data-content="PKCGAMMA targets 1 genes from the input gene list.The full list of substrates is available below:PRKCD" style="cursor: pointer; text-decoration: underline dotted;">1 substrates
192	MAPK13	0.3386	0	0	" title="Overlapping EnrichrSubstrates" data-content="MAPK13 targets 1 genes from the input gene list.The full list of substrates is available below:JUN" style="cursor: pointer; text-decoration: underline dotted;">1 substrates
193	AURORAB	0.3495	0	0	" title="Overlapping EnrichrSubstrates" data-content="AURORAB targets 1 genes from the input gene list.The full list of substrates is available below:RB1" style="cursor: pointer; text-decoration: underline dotted;">1 substrates
194	INSR	0.3531	0	0	" title="Overlapping EnrichrSubstrates" data-content="INSR targets 1 genes from the input gene list.The full list of substrates is available below:JUN" style="cursor: pointer; text-decoration: underline dotted;">1 substrates
195	PKC	0.3602	0	0	" title="Overlapping EnrichrSubstrates" data-content="PKC targets 1 genes from the input gene list.The full list of substrates is available below:CDKN1A" style="cursor: pointer; text-decoration: underline dotted;">1 substrates
196	MAPK12	0.3777	0	0	" title="Overlapping EnrichrSubstrates" data-content="MAPK12 targets 1 genes from the input gene list.The full list of substrates is available below:JUN" style="cursor: pointer; text-decoration: underline dotted;">1 substrates
197	TTK	0.4369	0	0	" title="Overlapping EnrichrSubstrates" data-content="TTK targets 1 genes from the input gene list.The full list of substrates is available below:HSP90AA1" style="cursor: pointer; text-decoration: underline dotted;">1 substrates
198	PRKAA1	0.4462	0	0	" title="Overlapping EnrichrSubstrates" data-content="PRKAA1 targets 1 genes from the input gene list.The full list of substrates is available below:RB1" style="cursor: pointer; text-decoration: underline dotted;">1 substrates
199	PAK1	0.482	0	0	" title="Overlapping EnrichrSubstrates" data-content="PAK1 targets 1 genes from the input gene list.The full list of substrates is available below:PRKCD" style="cursor: pointer; text-decoration: underline dotted;">1 substrates
200	FYN	0.6595	0	0	" title="Overlapping EnrichrSubstrates" data-content="FYN targets 1 genes from the input gene list.The full list of substrates is available below:PRKCD" style="cursor: pointer; text-decoration: underline dotted;">1 substrates
