# Supplementary material for: Signatures of Co-Deregulated Genes and Their Transcriptional Regulators in Lung Cancer
Source: Int J Mol Sci. 2022 Sep 18;23(18):10933. doi: 10.3390/ijms231810933 (PMC9504879; doi:10.3390/ijms231810933)
Supplement: Supplementary file 1 [file ijms-23-10933-s001.zip › Table S11.xlsx]

## Sheet: Table S11
Table S11: Protein-protein interaction (PPI) sub-network around proteins encoded by the co-downregulated genes in LC after single-gene perturbation.
X2K
Rank	Transcription Factor	Hypergeometric p-value	Z-score	Combined score	Enriched Targets
1	MYC	4.174e-12	0	0	" title="Overlapping EnrichrTargets" data-content="MYC targets 40 genes from the input gene list.Associations were determined from the following experiment:The full list of targets is available below:RPL4 RPL3 TFRC RPL22 FASN ANGPTL4 RPL11 RPS27L RPS2 RPL18 RPS27A LAPTM4A RPS7 RPS8 EEF2 NACA HSP90AB1 CNBP EIF4A1 ARL6IP1 RPS19 RPL36AL RPS11 RPS13 RPS12 PAICS RPS29 RPL27A RPS23 DHX15 COX8A NME2 PAB…
2	NELFE	5.109e-10	0	0	" title="Overlapping EnrichrTargets" data-content="NELFE targets 23 genes from the input gene list.Associations were determined from the following experiment:The full list of targets is available below:RPL3 ARL6IP1 TFRC ACTB RPS13 DDIT4 LDHA EGR1 RPL27A FASN ID2 HERPUD1 PABPC1 RPS2 NPM1 RPL10A HSPA8 EEF2 HSP90AB1 H2AFZ GAPDH MARCKSL1 P4HB" style="cursor: pointer; text-decoration: underline dotted…
3	SOX2	1.558e-07	0	0	" title="Overlapping EnrichrTargets" data-content="SOX2 targets 38 genes from the input gene list.Associations were determined from the following experiment:The full list of targets is available below:RNASE4 FN1 MLLT11 SFXN1 PTGR1 DUSP6 SPP1 CTGF LAPTM4A SOCS2 SP3 SCGB3A1 HSP90AB1 CYB5A KCNK1 ERRFI1 CHORDC1 ID2 ID1 CD24 KIT SCNN1A PPIC RPL3 FNDC3B STARD10 UBL3 PLS3 CYR61 KLF2 RPS19 RPS23 BASP1 FA…
4	MYC	2.9e-06	0	0	" title="Overlapping EnrichrTargets" data-content="MYC targets 55 genes from the input gene list.Associations were determined from the following experiment:The full list of targets is available below:TFRC FASN RPS27A EEF2 NACA NFE2L2 HSP90AB1 CNBP EIF3A EIF4A1 TAGLN2 PAICS HERPUD1 DHX15 CTSC PABPC1 EXOSC7 NPM1 VMP1 EEF1B2 HIGD2A BHLHE40 RPL4 RPL3 RPL22 LDHA PRDX4 RRS1 TCP1 SGMS1 RPL11 RPS2 RPL18 …
5	CEBPB	7.616e-06	0	0	" title="Overlapping EnrichrTargets" data-content="CEBPB targets 13 genes from the input gene list.Associations were determined from the following experiment:The full list of targets is available below:EIF4A1 ACTB COTL1 SLPI DDIT4 MLLT11 BHLHE40 NFE2L2 HERPUD1 ANKRD1 RPL13A AGPAT9 DRAM1" style="cursor: pointer; text-decoration: underline dotted;">13 targets
6	KLF4	1.649e-05	0	0	" title="Overlapping EnrichrTargets" data-content="KLF4 targets 39 genes from the input gene list.Associations were determined from the following experiment:The full list of targets is available below:SPINT1 TXNIP GABARAP FN1 MLLT11 GPRC5A SPP1 LAPTM4A SOCS2 HSP90AB1 GAPDH ATP10D CYB5A CNBP EIF4A1 ACTB MFSD2A TAGLN2 PAICS ID2 BNIP3 RPL22 JUND CDKN1A ADM RPS2 RPS8 RPL13A KLF2 AQP5 RPS19 RPS11 TMEM…
7	KAT2A	1.686e-05	0	0	" title="Overlapping EnrichrTargets" data-content="KAT2A targets 10 genes from the input gene list.Associations were determined from the following experiment:The full list of targets is available below:RPL4 HSP90AB1 RPS7 RPS8 RPL11 HSP90B1 RPS2 RPL18 EGR1 NACA" style="cursor: pointer; text-decoration: underline dotted;">10 targets
8	TCF3	3.797e-05	0	0	" title="Overlapping EnrichrTargets" data-content="TCF3 targets 34 genes from the input gene list.Associations were determined from the following experiment:The full list of targets is available below:DDIT4 LOC100129361 SH3BGRL3 NAB2 EEF2 NACA SP3 HSP90AB1 ACTR3 NDUFA4 P4HB ERRFI1 ACTB TAGLN2 EGR1 PI4K2B RPL3 ALCAM FNDC3B LDHA SGMS1 RPL10A PHLDA1 PSAP RNF11 PTP4A2 RPL36AL CLIC4 FAM162A COTL1 ZFP3…
9	RELA	7.931e-05	0	0	" title="Overlapping EnrichrTargets" data-content="RELA targets 23 genes from the input gene list.Associations were determined from the following experiment:The full list of targets is available below:STARD10 RPL18 RPS27A PSMB8 LRG1 RPL10A RPS7 HSP90B1 EEF2 NFE2L2 HSP90AB1 ACTR3 DRAM1 SORL1 ACTB RPS19 MFSD2A HERPUD1 CD74 ZFP36L1 AZIN1 BHLHE40 SGPP2" style="cursor: pointer; text-decoration: underl…
10	PML	0.0001824	0	0	" title="Overlapping EnrichrTargets" data-content="PML targets 51 genes from the input gene list.Associations were determined from the following experiment:The full list of targets is available below:TFRC DDIT4 FASN SP3 GAPDH MARCKSL1 EIF3A PABPC1 HIGD2A FNDC3B LDHA SGMS1 RPL10A RPL13A DNAJA1 RPS19 RPL36AL FTH1 RPS12 RPS29 RPS23 CSTB RBM3 ATP1A1 GABARAP SH3BGRL3 RPS27L EEF2 NFE2L2 NDUFC2 SLC25A5 …
11	ZMIZ1	0.0001838	0	0	" title="Overlapping EnrichrTargets" data-content="ZMIZ1 targets 34 genes from the input gene list.Associations were determined from the following experiment:The full list of targets is available below:DDIT4 MLLT11 FASN SH3BGRL3 RPS27L RPS27A ACAT2 HSP90AB1 SLC25A5 MARCKSL1 MID1IP1 P4HB EIF4A1 ACTB TAGLN2 EGR1 HERPUD1 TNFRSF12A GCLC PRDX4 JUND RPS2 RPL10A RPS8 DNAJA1 ARL6IP1 RPL36AL TMEM50A AVPI1…
12	TAF7	0.0003062	0	0	" title="Overlapping EnrichrTargets" data-content="TAF7 targets 26 genes from the input gene list.Associations were determined from the following experiment:The full list of targets is available below:RPL4 RPL3 TFRC JUND FASN RPL11 RPS2 HMGN1 RPS7 RPS8 EEF2 NACA HSP90AB1 ITGB5 RPL13A CNBP RPS19 RPS13 RPS12 BEX4 EGR1 RPL27A PABPC1 ATP5J2 HSPA8 H2AFZ" style="cursor: pointer; text-decoration: underl…
13	TAF1	0.0005644	0	0	" title="Overlapping EnrichrTargets" data-content="TAF1 targets 88 genes from the input gene list.Associations were determined from the following experiment:The full list of targets is available below:TFRC DDIT4 LAPTM4A UQCRB SP3 GAPDH CNBP HERPUD1 VMP1 TIMM8B MORF4L2 DNAJA1 RPS19 RPS11 RPS13 RPS12 RPS29 RPS23 SEC61G RBM3 RPS27L RPS27A EEF2 EIF4A1 CHORDC1 DHX15 CSDE1 NPM1 RPL22 JUND RPL11 RPL18 P…
14	E2F1	0.0005863	0	0	" title="Overlapping EnrichrTargets" data-content="E2F1 targets 31 genes from the input gene list.Associations were determined from the following experiment:The full list of targets is available below:RNASE4 PSMA1 RPS27L EEF2 SP3 NFE2L2 NPC2 CNBP P4HB EIF3F SDC4 ATP5L HERPUD1 COX8A KIT PPIC TIMM8B CD9 RPL3 PRDX4 CDKN1A UBL3 TCP1 EPCAM RPS2 KLF2 ARL6IP1 MGST1 CLIC4 NME2 ZFP36L1" style="cursor: poi…
15	MAX	0.001012	0	0	" title="Overlapping EnrichrTargets" data-content="MAX targets 59 genes from the input gene list.Associations were determined from the following experiment:The full list of targets is available below:TFRC TXNIP FASN NACA CNBP EIF3A SDC1 HERPUD1 PABPC1 VMP1 EEF1B2 HIGD2A BHLHE40 LDHA RRS1 SGMS1 RPL10A MORF4L2 RPL13A ADSS RPL36AL RPS11 RPS13 RPS12 RPS23 C1QBP AVPI1 FAM162A RBM3 DBP ATP5F1 RPS27A SO…
16	NFE2L2	0.001255	0	0	" title="Overlapping EnrichrTargets" data-content="NFE2L2 targets 34 genes from the input gene list.Associations were determined from the following experiment:The full list of targets is available below:CLDN3 FN1 AREG PTGR1 F3 SRP9 ADSSL1 SP3 CHORDC1 SLPI IL33 VMP1 FETUB GCLC LAMC2 RND3 CD9 SERPINE1 CDKN1A UBL3 RPL10A CDH2 PHLDA1 FTH1 RPS12 SGK1 AVPI1 CSTB ATP1B1 COL4A1 ATP5G3 AOX1 DCN TFPI" styl…
17	NANOG	0.001289	0	0	" title="Overlapping EnrichrTargets" data-content="NANOG targets 23 genes from the input gene list.Associations were determined from the following experiment:The full list of targets is available below:EMB DUSP6 SGMS1 SPP1 CTGF ABHD2 SCGB3A1 CYR61 SPARC ID2 ID1 RPS23 SEC61G ANKRD1 SFTPD KIT SGK1 BASP1 FAM162A ZFP36L1 SLC2A3 H2AFZ SCD" style="cursor: pointer; text-decoration: underline dotted;">23…
18	SALL4	0.001637	0	0	" title="Overlapping EnrichrTargets" data-content="SALL4 targets 16 genes from the input gene list.Associations were determined from the following experiment:The full list of targets is available below:FNDC3B SDC4 FASN ID2 UBL3 EMB SFTPD F3 CTGF UBE2E3 COL4A1 PHLDB2 SP3 SCGB3A1 CYR61 HK2" style="cursor: pointer; text-decoration: underline dotted;">16 targets
19	FOSL2	0.001751	0	0	" title="Overlapping EnrichrTargets" data-content="FOSL2 targets 11 genes from the input gene list.Associations were determined from the following experiment:The full list of targets is available below:KRT8 RNASE4 TAGLN2 ANKRD1 TNFRSF12A F3 EPCAM KRT19 KRT18 AZIN1 ITGA2" style="cursor: pointer; text-decoration: underline dotted;">11 targets
20	TCF3	0.001848	0	0	" title="Overlapping EnrichrTargets" data-content="TCF3 targets 33 genes from the input gene list.Associations were determined from the following experiment:The full list of targets is available below:CLDN3 DDIT4 FN1 SFXN1 DUSP6 GPRC5A SPP1 CTGF SOCS2 SP3 SCGB3A1 ITGB5 SLPI ID1 KIT BHLHE40 DMKN UBL3 EMB HBEGF SGMS1 CDH1 RPS8 ESRP1 CEBPA KLF2 RPS19 RPS29 RPS23 ANKRD1 SGK1 BASP1 ZFP36L1" style="cur…
21	CTCF	0.002295	0	0	" title="Overlapping EnrichrTargets" data-content="CTCF targets 51 genes from the input gene list.Associations were determined from the following experiment:The full list of targets is available below:DDIT4 FASN SPP1 MARCKSL1 SORL1 EIF3F ACTB EGR1 SDC1 COX6A1 BHLHE40 RND3 ALCAM RRS1 STARD10 SGMS1 RPL10A CLU MORF4L2 PARM1 CYR61 CEBPA ADSS RPS19 RPS29 C1QBP FAM162A H2AFZ THBS1 PTGR1 SRP9 ADSSL1 UBE…
22	PPARG	0.003788	0	0	" title="Overlapping EnrichrTargets" data-content="PPARG targets 20 genes from the input gene list.Associations were determined from the following experiment:The full list of targets is available below:RNASE4 DDIT4 SFXN1 CDKN1A DUSP6 ANGPTL4 SGMS1 PHLDA1 SP3 EIF3A ACTB MGST1 VMP1 OVOS2 HADH LTBP2 AOX1 AGPAT9 SCD CD9" style="cursor: pointer; text-decoration: underline dotted;">20 targets
23	CEBPD	0.004142	0	0	" title="Overlapping EnrichrTargets" data-content="CEBPD targets 25 genes from the input gene list.Associations were determined from the following experiment:The full list of targets is available below:TFRC DDIT4 TXNIP MLLT11 RPL18 HNMT EEF2 SP3 NFE2L2 ACTR3 RPL13A DRAM1 MARCKSL1 EIF3A EIF4A1 ACTB FTH1 ATP5J RPL27A ID1 CTSH COTL1 AZIN1 BHLHE40 H2AFZ" style="cursor: pointer; text-decoration: under…
24	ATF2	0.005935	0	0	" title="Overlapping EnrichrTargets" data-content="ATF2 targets 72 genes from the input gene list.Associations were determined from the following experiment:The full list of targets is available below:TFRC DDIT4 TXNIP UQCRB HSP90B1 NACA ACTR3 TMBIM6 GAPDH MARCKSL1 CNBP EIF3F EIF3A EGR1 HERPUD1 COX8A VMP1 EEF1B2 HIGD2A TIMM8B SGMS1 RPL10A HMGN3 MORF4L2 RPL13A RPS19 RPS11 RPS13 RPS12 RPS29 RPS23 FA…
25	GATA2	0.007586	0	0	" title="Overlapping EnrichrTargets" data-content="GATA2 targets 25 genes from the input gene list.Associations were determined from the following experiment:The full list of targets is available below:DDIT4 TXNIP SH3BGRL3 F3 ITGA2 SCGB1A1 ERRFI1 EPHA2 ST8SIA6 PTPRF AGPAT9 SERPINE1 CDKN1A FAM102B SGMS1 ABHD2 PSAP PTP4A2 KLF2 CLIC4 HINT1 KRT18 COTL1 ATP1B1 ATP1A1" style="cursor: pointer; text-deco…
26	CHD1	0.01529	0	0	" title="Overlapping EnrichrTargets" data-content="CHD1 targets 21 genes from the input gene list.Associations were determined from the following experiment:The full list of targets is available below:RPL22 DDIT4 LDHA JUND MLLT11 UBL3 RPS27L NAB2 BZW1 LAPTM4A RPS8 MORF4L2 EEF2 NFE2L2 TST RPL36AL CLIC4 HSPA8 RBM3 DBP SOD2" style="cursor: pointer; text-decoration: underline dotted;">21 targets
27	SIN3A	0.01685	0	0	" title="Overlapping EnrichrTargets" data-content="SIN3A targets 32 genes from the input gene list.Associations were determined from the following experiment:The full list of targets is available below:TFRC DDIT4 GABARAP RPS27L EEF2 NFE2L2 HSP90AB1 GAPDH SLC12A2 NDUFA2 EIF4A1 ATP5L PAICS ID2 ID1 HERPUD1 PABPC1 NPM1 VMP1 HIGD2A RPL4 LDHA RRS1 TCP1 RPS2 RPL10A BZW1 PHLDA1 RPS7 AZIN1 H2AFZ HSPD1" st…
28	STAT3	0.02262	0	0	" title="Overlapping EnrichrTargets" data-content="STAT3 targets 8 genes from the input gene list.Associations were determined from the following experiment:The full list of targets is available below:ARL6IP1 ADRB2 ZFP36L1 SOCS2 ID2 HK2 EMP1 PABPC1" style="cursor: pointer; text-decoration: underline dotted;">8 targets
29	TP63	0.02648	0	0	" title="Overlapping EnrichrTargets" data-content="TP63 targets 37 genes from the input gene list.Associations were determined from the following experiment:The full list of targets is available below:FASN F3 PFKFB3 LRRC8C ERRFI1 EGR1 ID2 SDC1 NRP1 HERPUD1 CTSK EXOSC7 HIGD2A LAMC2 LAMB3 PI4K2B ALCAM RNF128 S100A14 CDKN1A UBL3 EMB HBEGF GPNMB CDH1 ABHD2 GPX2 CEBPA KRT8 C1QBP SGK1 AVPI1 FAM162A ATP…
30	HNF4A	0.02994	0	0	" title="Overlapping EnrichrTargets" data-content="HNF4A targets 34 genes from the input gene list.Associations were determined from the following experiment:The full list of targets is available below:RBP4 C3 SFXN1 PTGR1 DUSP6 CXCL17 HNMT CTGF LAPTM4A ATP11A ACAT2 RAP1GAP NFE2L2 SLC25A5 CYB5A EIF3A PAICS TF ID1 SDC1 VMP1 EEF1B2 SOD2 SERPINE1 JUND PTP4A2 CEBPA AVPI1 UQCR11 ATP1B1 AOX1 MYH7 HSPD1 …
31	POU5F1	0.03074	0	0	" title="Overlapping EnrichrTargets" data-content="POU5F1 targets 10 genes from the input gene list.Associations were determined from the following experiment:The full list of targets is available below:FASN ID2 DUSP6 SGK1 EEF1B2 CDH1 ZFP36L1 SOCS2 HK2 SCD" style="cursor: pointer; text-decoration: underline dotted;">10 targets
32	CREB1	0.03952	0	0	" title="Overlapping EnrichrTargets" data-content="CREB1 targets 37 genes from the input gene list.Associations were determined from the following experiment:The full list of targets is available below:DDIT4 EEF2 HSP90AB1 TMBIM6 GAPDH P4HB EIF3A EIF4A1 ACTB EGR1 ID1 PTPRN COX8A CSDE1 PABPC1 EXOSC7 NPM1 VMP1 LDHA JUND CDKN1A UBL3 RPL18 MORF4L2 RPL13A KLF2 RPS19 FTH1 RPS13 HLA-A RPS29 AVPI1 HSPA8 A…
33	FOXA2	0.04283	0	0	" title="Overlapping EnrichrTargets" data-content="FOXA2 targets 11 genes from the input gene list.Associations were determined from the following experiment:The full list of targets is available below:ERRFI1 SERPINE1 KRT8 ID2 HERPUD1 ANKRD1 DUSP6 KRT18 CXCL17 PHLDB2 ITGB5" style="cursor: pointer; text-decoration: underline dotted;">11 targets
34	FOXA1	0.04612	0	0	" title="Overlapping EnrichrTargets" data-content="FOXA1 targets 8 genes from the input gene list.Associations were determined from the following experiment:The full list of targets is available below:KRT8 HERPUD1 ANKRD1 DUSP6 KRT18 PLS3 ITGB5 SELENBP1" style="cursor: pointer; text-decoration: underline dotted;">8 targets
35	PPARD	0.0498	0	0	" title="Overlapping EnrichrTargets" data-content="PPARD targets 10 genes from the input gene list.Associations were determined from the following experiment:The full list of targets is available below:FTH1 KRT7 TXNIP NRP1 SRP9 KIT ANGPTL4 KRT18 CCND1 CDH2" style="cursor: pointer; text-decoration: underline dotted;">10 targets
36	TCF7L2	0.05671	0	0	" title="Overlapping EnrichrTargets" data-content="TCF7L2 targets 17 genes from the input gene list.Associations were determined from the following experiment:The full list of targets is available below:DUSP6 PHLDA1 ABHD2 SOCS2 NFE2L2 TMBIM6 SEMA3C MT1X ACTB TAGLN2 ATP5J PAICS ID2 ID1 CCND1 ATP1B1 DCXR" style="cursor: pointer; text-decoration: underline dotted;">17 targets
37	GATA1	0.05984	0	0	" title="Overlapping EnrichrTargets" data-content="GATA1 targets 22 genes from the input gene list.Associations were determined from the following experiment:The full list of targets is available below:TFRC DDIT4 RAP1GAP ITGB5 SCGB1A1 KCNK1 ERRFI1 ACTB EPHA2 ID2 PTPRF KIT LGALS3BP SGMS1 CDH1 ABHD2 FTH1 HINT1 KRT19 ATP1B1 COL4A2 SLC2A3" style="cursor: pointer; text-decoration: underline dotted;">2…
38	STAT3	0.06433	0	0	" title="Overlapping EnrichrTargets" data-content="STAT3 targets 20 genes from the input gene list.Associations were determined from the following experiment:The full list of targets is available below:RNASE4 DDIT4 RPS27A PSMB8 LAPTM4A MORF4L2 HSP90B1 NFE2L2 PTP4A2 GLRX EIF3F EGR1 SEC61G COX8A AVPI1 BASP1 COX7A2 ZFP36L1 BHLHE40 SOD2" style="cursor: pointer; text-decoration: underline dotted;">20 …
39	SMC3	0.06583	0	0	" title="Overlapping EnrichrTargets" data-content="SMC3 targets 30 genes from the input gene list.Associations were determined from the following experiment:The full list of targets is available below:DDIT4 PTGR1 SRP9 UBE2E3 SOCS2 EEF2 NFE2L2 MARCKSL1 EIF3F EGR1 ID2 PTPRF COX6A1 BHLHE40 RND3 RRS1 S100A14 FAM102B RPL11 CLU PHLDA1 MORF4L2 PTP4A2 SEMA3C C1QBP BASP1 LTBP2 AZIN1 H2AFZ THBS1" style="cu…
40	BRCA1	0.06986	0	0	" title="Overlapping EnrichrTargets" data-content="BRCA1 targets 72 genes from the input gene list.Associations were determined from the following experiment:The full list of targets is available below:TFRC DDIT4 TXNIP GAPDH VMP1 ALCAM UBL3 DNAJA1 RPS19 RPS11 RPS29 AVPI1 DBP RNASE4 ARG2 ADSSL1 P4HB CSDE1 NPM1 GCLC SOD2 RPL22 PRDX4 JUND RPL18 PHLDA1 ABHD2 ARL6IP1 HSPA8 HSPD1 NACA ACTR3 TMBIM6 EIF3…
41	USF2	0.07434	0	0	" title="Overlapping EnrichrTargets" data-content="USF2 targets 25 genes from the input gene list.Associations were determined from the following experiment:The full list of targets is available below:GABARAP FASN LAPTM4A SOCS2 EEF2 GAPDH EIF3F EIF3A EIF4A1 HERPUD1 NPM1 BHLHE40 LDHA PRDX4 HMGN1 PSAP RPL13A PTP4A2 NME2 AVPI1 CSTB RBM3 DBP H2AFZ ATP5F1" style="cursor: pointer; text-decoration: unde…
42	ESR1	0.07867	0	0	" title="Overlapping EnrichrTargets" data-content="ESR1 targets 6 genes from the input gene list.Associations were determined from the following experiment:The full list of targets is available below:ACTB ZFP36L1 C3 ID2 PTP4A2 SEMA3C" style="cursor: pointer; text-decoration: underline dotted;">6 targets
43	BCL3	0.08157	0	0	" title="Overlapping EnrichrTargets" data-content="BCL3 targets 9 genes from the input gene list.Associations were determined from the following experiment:The full list of targets is available below:ARL6IP1 ACTB ALCAM GABARAP JUND RPS7 CYBA BHLHE40 SP3" style="cursor: pointer; text-decoration: underline dotted;">9 targets
44	IRF8	0.0863	0	0	" title="Overlapping EnrichrTargets" data-content="IRF8 targets 5 genes from the input gene list.Associations were determined from the following experiment:The full list of targets is available below:RNASE4 HLA-A HSP90AB1 CD74 PSMB8" style="cursor: pointer; text-decoration: underline dotted;">5 targets
45	RAD21	0.08859	0	0	" title="Overlapping EnrichrTargets" data-content="RAD21 targets 31 genes from the input gene list.Associations were determined from the following experiment:The full list of targets is available below:DDIT4 ARG2 PTGR1 SRP9 SPP1 SOCS2 EEF2 NFE2L2 SLC25A5 EIF3F CD14 SDC1 PTPRF BHLHE40 RND3 SOD2 RRS1 STARD10 FAM102B RPL10A CLU PHLDA1 MORF4L2 PARM1 PTP4A2 C1QBP BASP1 AZIN1 NR4A1 H2AFZ THBS1" style="…
46	RUNX1	0.1094	0	0	" title="Overlapping EnrichrTargets" data-content="RUNX1 targets 31 genes from the input gene list.Associations were determined from the following experiment:The full list of targets is available below:RNASE4 MLLT11 SH3BGRL3 DUSP6 PSMA4 SOCS2 NFE2L2 ACTR3 LRRC8C CNBP EGR1 ID2 PTPRF EXOSC7 NPM1 GCLC BHLHE40 SOD2 SERPINE1 SIVA1 FAM102B BZW1 HMGN1 F2R ABHD2 PTP4A2 FTH1 CLIC4 COTL1 ATP1B1 HSPA8" styl…
47	ZBTB7A	0.1211	0	0	" title="Overlapping EnrichrTargets" data-content="ZBTB7A targets 49 genes from the input gene list.Associations were determined from the following experiment:The full list of targets is available below:FASN ATP11A HSP90B1 SP3 ACTR3 DRAM1 MARCKSL1 ACTB EGR1 SDC1 EEF1B2 BHLHE40 SGMS1 NUCB2 CLU TST CEBPA FTH1 CSTB ATP1B1 DBP MLLT11 PSMA4 PSMA1 UBE2E3 RAP1GAP NFE2L2 HSP90AB1 NPC2 PCBD1 EPHA2 PAICS I…
48	HDAC2	0.1223	0	0	" title="Overlapping EnrichrTargets" data-content="HDAC2 targets 6 genes from the input gene list.Associations were determined from the following experiment:The full list of targets is available below:RPS19 DDIT4 ID1 NFE2L2 HINT1 NDUFC2" style="cursor: pointer; text-decoration: underline dotted;">6 targets
49	ZBTB33	0.1253	0	0	" title="Overlapping EnrichrTargets" data-content="ZBTB33 targets 18 genes from the input gene list.Associations were determined from the following experiment:The full list of targets is available below:RPL4 TFRC PRDX4 LOC100129361 RPS2 RPL10A BZW1 RPS7 ADSS SLC12A2 RPS19 RPS11 RPL27A CSDE1 NPM1 VMP1 HIGD2A ATP5F1" style="cursor: pointer; text-decoration: underline dotted;">18 targets
50	IRF1	0.134	0	0	" title="Overlapping EnrichrTargets" data-content="IRF1 targets 8 genes from the input gene list.Associations were determined from the following experiment:The full list of targets is available below:RPS12 PSME1 JUND MRPL32 PSMA2 PSMB8 LRG1 DNAJA1" style="cursor: pointer; text-decoration: underline dotted;">8 targets
51	EGR1	0.1515	0	0	" title="Overlapping EnrichrTargets" data-content="EGR1 targets 9 genes from the input gene list.Associations were determined from the following experiment:The full list of targets is available below:CLDN3 EGR1 TNFRSF12A CSTB SNX25 CDH1 SLC25A5 THBS1 SELENBP1" style="cursor: pointer; text-decoration: underline dotted;">9 targets
52	ZNF384	0.1595	0	0	" title="Overlapping EnrichrTargets" data-content="ZNF384 targets 18 genes from the input gene list.Associations were determined from the following experiment:The full list of targets is available below:MRPL32 EMP1 PSMA2 TCP1 UBE2E3 MORF4L2 SOCS2 SP3 HSP90AB1 TMBIM6 NDUFA3 ACTB TAGLN2 CLIC4 CTSC ZFP36L1 SLC2A3 DBP" style="cursor: pointer; text-decoration: underline dotted;">18 targets
53	ETS1	0.1815	0	0	" title="Overlapping EnrichrTargets" data-content="ETS1 targets 5 genes from the input gene list.Associations were determined from the following experiment:The full list of targets is available below:RPS11 HIGD2A NFE2L2 HSP90AB1 CSDE1" style="cursor: pointer; text-decoration: underline dotted;">5 targets
54	USF1	0.182	0	0	" title="Overlapping EnrichrTargets" data-content="USF1 targets 32 genes from the input gene list.Associations were determined from the following experiment:The full list of targets is available below:GABARAP ABRACL NAB2 SOCS2 EEF2 GAPDH EIF3F EIF3A EIF4A1 ID2 HERPUD1 NPM1 BHLHE40 FNDC3B LDHA PRDX4 SGMS1 PLS3 HMGN1 CLIP4 BRI3 PSAP RPL13A CEBPA WBP5 NME2 AVPI1 CSTB UQCR11 DBP H2AFZ ATP5F1" style="…
55	YY1	0.1863	0	0	" title="Overlapping EnrichrTargets" data-content="YY1 targets 9 genes from the input gene list.Associations were determined from the following experiment:The full list of targets is available below:RPL4 RPL18 ATP5J2 UQCRB NACA RPL13A DCN NDUFA3 NDUFA2" style="cursor: pointer; text-decoration: underline dotted;">9 targets
56	BCLAF1	0.1945	0	0	" title="Overlapping EnrichrTargets" data-content="BCLAF1 targets 20 genes from the input gene list.Associations were determined from the following experiment:The full list of targets is available below:TFRC NFE2L2 HSP90AB1 NDUFC2 ATP5J EGR1 HIGD2A BHLHE40 JUND SGMS1 RPL11 RPL18 RPS7 RPS8 PTP4A2 ADSS RPS19 RPS13 RPS12 HSPD1" style="cursor: pointer; text-decoration: underline dotted;">20 targets
57	TRIM28	0.2001	0	0	" title="Overlapping EnrichrTargets" data-content="TRIM28 targets 4 genes from the input gene list.Associations were determined from the following experiment:The full list of targets is available below:RPS7 NFE2L2 HSP90AB1 TFPI" style="cursor: pointer; text-decoration: underline dotted;">4 targets
58	SPI1	0.2012	0	0	" title="Overlapping EnrichrTargets" data-content="SPI1 targets 34 genes from the input gene list.Associations were determined from the following experiment:The full list of targets is available below:ABRACL LAPTM4A ACTR3 TMBIM6 HERPUD1 PABPC1 COX6A1 EEF1B2 HIGD2A TIMM8B TCP1 GPNMB RPS19 RPL36AL RPS11 RPS13 ATP1A1 GABARAP SH3BGRL3 PSMB8 NFE2L2 NDUFA2 EIF4A1 CD14 RPL27A RPL4 RPL22 FAM102B F2R PSAP…
59	SPI1	0.2097	0	0	" title="Overlapping EnrichrTargets" data-content="SPI1 targets 24 genes from the input gene list.Associations were determined from the following experiment:The full list of targets is available below:GABARAP DUSP6 ABRACL RPS27A PSMB8 S100A4 ACTR3 TMBIM6 EIF3A EIF4A1 CD14 RPL27A VMP1 COX6A1 EEF1B2 BHLHE40 TIMM8B PSAP ARL6IP1 RPS19 RPS11 HLA-A AKR1B10 DBP" style="cursor: pointer; text-decoration: …
60	SRF	0.2141	0	0	" title="Overlapping EnrichrTargets" data-content="SRF targets 8 genes from the input gene list.Associations were determined from the following experiment:The full list of targets is available below:ACTB RPL22 EGR1 ABRACL RPL18 EEF1B2 PFKFB3 ACTR3" style="cursor: pointer; text-decoration: underline dotted;">8 targets
61	TRIM28	0.2152	0	0	" title="Overlapping EnrichrTargets" data-content="TRIM28 targets 6 genes from the input gene list.Associations were determined from the following experiment:The full list of targets is available below:EGR1 ID2 CLIC4 HMGN3 COL4A1 KCNK1" style="cursor: pointer; text-decoration: underline dotted;">6 targets
62	BHLHE40	0.222	0	0	" title="Overlapping EnrichrTargets" data-content="BHLHE40 targets 9 genes from the input gene list.Associations were determined from the following experiment:The full list of targets is available below:EIF4A1 GABARAP AVPI1 SOCS2 PSAP BHLHE40 H2AFZ SLC25A5 BNIP3" style="cursor: pointer; text-decoration: underline dotted;">9 targets
63	FOS	0.2345	0	0	" title="Overlapping EnrichrTargets" data-content="FOS targets 15 genes from the input gene list.Associations were determined from the following experiment:The full list of targets is available below:TXNIP NUCB2 LAPTM4A MORF4L2 ABHD2 HSP90B1 SP3 TMBIM6 P4HB EIF3F EIF4A1 TNFRSF12A COTL1 TFPI HSPD1" style="cursor: pointer; text-decoration: underline dotted;">15 targets
64	FOXP2	0.2549	0	0	" title="Overlapping EnrichrTargets" data-content="FOXP2 targets 5 genes from the input gene list.Associations were determined from the following experiment:The full list of targets is available below:NAB2 JUND NFE2L2 CLIC4 PABPC1" style="cursor: pointer; text-decoration: underline dotted;">5 targets
65	AR	0.2626	0	0	" title="Overlapping EnrichrTargets" data-content="AR targets 24 genes from the input gene list.Associations were determined from the following experiment:The full list of targets is available below:SRP9 PSMA1 UBE2E3 CYB5A KCNK1 ERRFI1 PAG1 NRP1 PTPRF PRR15L RND3 FNDC3B TUSC3 CLU CDH1 PHLDB2 ABHD2 KLF2 ANKRD1 COL4A1 ADRB2 ZFP36L1 H2AFZ THBS1" style="cursor: pointer; text-decoration: underline dot…
66	E2F6	0.2832	0	0	" title="Overlapping EnrichrTargets" data-content="E2F6 targets 66 genes from the input gene list.Associations were determined from the following experiment:The full list of targets is available below:TFRC SP3 GAPDH DRAM1 CNBP SDC1 HERPUD1 BNIP3 PI4K2B CEBPA RPS11 RPS13 AVPI1 ATP1B1 DBP ATP1A1 RNASE4 UBE2E3 PFKFB3 ME1 P4HB EIF4A1 TAGLN2 DHX15 NPM1 PRDX4 DCXR HSPD1 FASN NAB2 HSP90B1 EIF3A EEF1B2 H…
67	STAT5A	0.2863	0	0	" title="Overlapping EnrichrTargets" data-content="STAT5A targets 6 genes from the input gene list.Associations were determined from the following experiment:The full list of targets is available below:FTH1 DDIT4 EGR1 LAPTM4A SOCS2 NFE2L2" style="cursor: pointer; text-decoration: underline dotted;">6 targets
68	PBX3	0.2968	0	0	" title="Overlapping EnrichrTargets" data-content="PBX3 targets 27 genes from the input gene list.Associations were determined from the following experiment:The full list of targets is available below:GABARAP FASN SNX25 LAPTM4A NACA SP3 NFE2L2 HSP90AB1 GAPDH CYB5A P4HB EIF4A1 ACTB TAGLN2 ID2 COX8A COX6B1 RPL4 JUND TCP1 HMGN3 ABHD2 RPL36AL RPS11 CLIC4 AVPI1 AZIN1" style="cursor: pointer; text-deco…
69	NFYA	0.3156	0	0	" title="Overlapping EnrichrTargets" data-content="NFYA targets 46 genes from the input gene list.Associations were determined from the following experiment:The full list of targets is available below:DDIT4 TXNIP FASN LAPTM4A HSP90B1 SP3 TMBIM6 CNBP EIF3F KCNK1 ACTB HERPUD1 COX8A COX6B1 TCP1 NUCB2 HMGN3 HMGN1 MORF4L2 RPL13A RPL36AL SEC61G FAM162A COTL1 DBP H2AFZ TMA7 SRP9 PSMB8 ACAT2 NPC2 NDUFA2 …
70	SMAD4	0.3201	0	0	" title="Overlapping EnrichrTargets" data-content="SMAD4 targets 13 genes from the input gene list.Associations were determined from the following experiment:The full list of targets is available below:ALCAM SFXN1 DUSP6 SGMS1 CYR61 ACTR3 ATP5J ID1 NRP1 LTBP2 BHLHE40 CHI3L1 THBS1" style="cursor: pointer; text-decoration: underline dotted;">13 targets
71	EGR1	0.3252	0	0	" title="Overlapping EnrichrTargets" data-content="EGR1 targets 12 genes from the input gene list.Associations were determined from the following experiment:The full list of targets is available below:TFRC UBL3 RPS2 NAB2 BZW1 PTP4A2 SLC25A5 NDUFA4 DNAJA1 PABPC1 AVPI1 HSPA8" style="cursor: pointer; text-decoration: underline dotted;">12 targets
72	ZEB1	0.3309	0	0	" title="Overlapping EnrichrTargets" data-content="ZEB1 targets 3 genes from the input gene list.Associations were determined from the following experiment:The full list of targets is available below:SPINT1 TMC4 CYB5A" style="cursor: pointer; text-decoration: underline dotted;">3 targets
73	RFX5	0.3745	0	0	" title="Overlapping EnrichrTargets" data-content="RFX5 targets 12 genes from the input gene list.Associations were determined from the following experiment:The full list of targets is available below:DDIT4 FASN PSMB8 HMGN3 MORF4L2 ACAT2 NPC2 CD74 CCND1 AZIN1 ATP1A1 SCD" style="cursor: pointer; text-decoration: underline dotted;">12 targets
74	ZKSCAN1	0.4018	0	0	" title="Overlapping EnrichrTargets" data-content="ZKSCAN1 targets 3 genes from the input gene list.Associations were determined from the following experiment:The full list of targets is available below:PSME1 NFE2L2 LPCAT1" style="cursor: pointer; text-decoration: underline dotted;">3 targets
75	TP53	0.4043	0	0	" title="Overlapping EnrichrTargets" data-content="TP53 targets 7 genes from the input gene list.Associations were determined from the following experiment:The full list of targets is available below:SERPINE2 RPS19 DDIT4 EPHA2 CDKN1A RPS27L ADRB2" style="cursor: pointer; text-decoration: underline dotted;">7 targets
76	NFIC	0.4378	0	0	" title="Overlapping EnrichrTargets" data-content="NFIC targets 6 genes from the input gene list.Associations were determined from the following experiment:The full list of targets is available below:LDHA EGR1 PHLDA1 ZFP36L1 BHLHE40 GAPDH" style="cursor: pointer; text-decoration: underline dotted;">6 targets
77	NFYB	0.4381	0	0	" title="Overlapping EnrichrTargets" data-content="NFYB targets 72 genes from the input gene list.Associations were determined from the following experiment:The full list of targets is available below:DDIT4 TXNIP LAPTM4A SP3 GAPDH ATP10D DRAM1 CNBP KCNK1 HERPUD1 COX8A MORF4L2 SEC61G AVPI1 ATP1B1 RBM3 DBP ARG2 ACAT2 NPC2 P4HB EIF4A1 DHX15 CCND1 JUND ABHD2 ARL6IP1 HSPA8 DCXR HSPD1 FASN HSP90B1 TMBI…
78	ZC3H11A	0.4464	0	0	" title="Overlapping EnrichrTargets" data-content="ZC3H11A targets 3 genes from the input gene list.Associations were determined from the following experiment:The full list of targets is available below:CLU SOCS2 PTPRF" style="cursor: pointer; text-decoration: underline dotted;">3 targets
79	FLI1	0.4633	0	0	" title="Overlapping EnrichrTargets" data-content="FLI1 targets 13 genes from the input gene list.Associations were determined from the following experiment:The full list of targets is available below:LDHA RRS1 DUSP6 RPS7 ARL6IP1 RPS19 CHORDC1 RPS11 RPS13 ATP5J RPL27A SEC61G COX7A2" style="cursor: pointer; text-decoration: underline dotted;">13 targets
80	SP1	0.4737	0	0	" title="Overlapping EnrichrTargets" data-content="SP1 targets 14 genes from the input gene list.Associations were determined from the following experiment:The full list of targets is available below:SRP9 SGMS1 RPS2 MORF4L2 ABHD2 HSP90B1 ACTR3 PTP4A2 EIF4A1 ARL6IP1 RPS19 COTL1 COX6B1 GCLC" style="cursor: pointer; text-decoration: underline dotted;">14 targets
81	YY1	0.4754	0	0	" title="Overlapping EnrichrTargets" data-content="YY1 targets 53 genes from the input gene list.Associations were determined from the following experiment:The full list of targets is available below:SFXN1 UQCRB NACA ACTR3 GAPDH EIF3F EIF3A HERPUD1 COX8A COX6A1 EEF1B2 HIGD2A TIMM8B FNDC3B STARD10 UBL3 SGMS1 RPL13A ADSS FTH1 RPS11 RPS13 RPS29 FAM162A ATP5J2 RBM3 ATP5F1 TMA7 LOC100129361 MRPL32 SRP…
82	CREB1	0.488	0	0	" title="Overlapping EnrichrTargets" data-content="CREB1 targets 43 genes from the input gene list.Associations were determined from the following experiment:The full list of targets is available below:TFRC LAPTM4A UQCRB EIF3F EIF3A EGR1 COX8A PABPC1 VMP1 EEF1B2 FNDC3B LDHA UBL3 TCP1 MORF4L2 CYR61 RPL13A RPS11 RPS13 RPS29 AVPI1 HADH ATP1A1 ARG2 PSMB8 EEF2 HSP90AB1 P4HB EIF4A1 ID1 EXOSC7 CD74 VCPK…
83	ERG	0.5173	0	0	" title="Overlapping EnrichrTargets" data-content="ERG targets 3 genes from the input gene list.Associations were determined from the following experiment:The full list of targets is available below:RPL22 S100A4 PSMA2" style="cursor: pointer; text-decoration: underline dotted;">3 targets
84	UBTF	0.5224	0	0	" title="Overlapping EnrichrTargets" data-content="UBTF targets 31 genes from the input gene list.Associations were determined from the following experiment:The full list of targets is available below:FASN NAB2 ATP10D MARCKSL1 EGR1 SDC1 VMP1 BHLHE40 AGPAT9 PI4K2B HMGN1 ADSS RPL36AL ATP1A1 PSMA4 UBE2E3 PFKFB3 RGCC NFE2L2 LRRC8C SLC12A2 DHX15 EXOSC7 GCLC JUND FAM102B PHLDA1 F2R RNF11 PTP4A2 CLIC4" …
85	FOXM1	0.5415	0	0	" title="Overlapping EnrichrTargets" data-content="FOXM1 targets 2 genes from the input gene list.Associations were determined from the following experiment:The full list of targets is available below:ARL6IP1 HSP90B1" style="cursor: pointer; text-decoration: underline dotted;">2 targets
86	SUZ12	0.5962	0	0	" title="Overlapping EnrichrTargets" data-content="SUZ12 targets 31 genes from the input gene list.Associations were determined from the following experiment:The full list of targets is available below:CH25H MFSD2A NRP1 AGPAT9 ALCAM HMGN3 SLC26A4 CYR61 CEBPA AQP5 HLA-A GUCY1B3 TMEM30B RBP4 ARG2 MAL LRRC8C ST8SIA6 CD14 PAG1 CD24 SERPINE2 ADM CDH2 PHLDB2 ATP8B1 SEMA3C COL4A2 COL4A1 LTBP2 SGPP2" sty…
87	MYOD1	0.6119	0	0	" title="Overlapping EnrichrTargets" data-content="MYOD1 targets 3 genes from the input gene list.Associations were determined from the following experiment:The full list of targets is available below:SDC4 ANKRD1 ABRACL" style="cursor: pointer; text-decoration: underline dotted;">3 targets
88	NR2C2	0.6533	0	0	" title="Overlapping EnrichrTargets" data-content="NR2C2 targets 6 genes from the input gene list.Associations were determined from the following experiment:The full list of targets is available below:RPL22 ATP5J TMA7 ATP11A NACA TIMM8B" style="cursor: pointer; text-decoration: underline dotted;">6 targets
89	IRF3	0.7141	0	0	" title="Overlapping EnrichrTargets" data-content="IRF3 targets 11 genes from the input gene list.Associations were determined from the following experiment:The full list of targets is available below:TCP1 LAPTM4A ABHD2 ACAT2 HSP90B1 P4HB EIF3F EIF4A1 ID2 COX6B1 AZIN1" style="cursor: pointer; text-decoration: underline dotted;">11 targets
90	VDR	0.7653	0	0	" title="Overlapping EnrichrTargets" data-content="VDR targets 1 genes from the input gene list.Associations were determined from the following experiment:The full list of targets is available below:PABPC1" style="cursor: pointer; text-decoration: underline dotted;">1 targets
91	RCOR1	0.7788	0	0	" title="Overlapping EnrichrTargets" data-content="RCOR1 targets 11 genes from the input gene list.Associations were determined from the following experiment:The full list of targets is available below:DDIT4 MLLT11 PSMB8 ACAT2 HSP90AB1 TST GLRX UQCR11 H2AFZ BNIP3 SCD" style="cursor: pointer; text-decoration: underline dotted;">11 targets
92	E2F4	0.7908	0	0	" title="Overlapping EnrichrTargets" data-content="E2F4 targets 11 genes from the input gene list.Associations were determined from the following experiment:The full list of targets is available below:SIVA1 TCP1 ADSS EIF3F PAICS DHX15 COX8A NPM1 ATP5J2 HSPA8 H2AFZ" style="cursor: pointer; text-decoration: underline dotted;">11 targets
93	EZH2	0.8272	0	0	" title="Overlapping EnrichrTargets" data-content="EZH2 targets 3 genes from the input gene list.Associations were determined from the following experiment:The full list of targets is available below:CD24 COL4A2 ESRP1" style="cursor: pointer; text-decoration: underline dotted;">3 targets
94	SP2	0.849	0	0	" title="Overlapping EnrichrTargets" data-content="SP2 targets 15 genes from the input gene list.Associations were determined from the following experiment:The full list of targets is available below:RPS27L LAPTM4A SP3 CYB5A EIF4A1 ID2 COX6B1 TCP1 RPL11 RPL18 NUCB2 RPS7 ABHD2 RPL36AL COX7A2" style="cursor: pointer; text-decoration: underline dotted;">15 targets
95	ELF1	0.8506	0	0	" title="Overlapping EnrichrTargets" data-content="ELF1 targets 41 genes from the input gene list.Associations were determined from the following experiment:The full list of targets is available below:SP3 ACTR3 EIF3F COX8A PABPC1 VMP1 EEF1B2 HIGD2A TIMM8B RRS1 TCP1 RPL13A ADSS DNAJA1 RPS19 RPL36AL RPS11 RPS12 SEC61G RBM3 GABARAP TMA7 PSMA4 RPS27L RPS27A NDUFA1 EIF4A1 CHORDC1 ATP5J RPL27A ID2 VCPK…
96	NRF1	0.8646	0	0	" title="Overlapping EnrichrTargets" data-content="NRF1 targets 30 genes from the input gene list.Associations were determined from the following experiment:The full list of targets is available below:LAPTM4A UQCRB TMBIM6 COX6A1 TIMM8B BNIP3 LDHA STARD10 TCP1 RPL13A RPS12 RPS29 SEC61G MRPL32 PSMA4 PSMA2 EEF2 NDUFA3 P4HB CHORDC1 PAICS CSDE1 NPM1 LPCAT1 PSAP CLIC4 HINT1 UQCR11 HSPA8 HSPD1" style="c…
97	SIX5	0.8855	0	0	" title="Overlapping EnrichrTargets" data-content="SIX5 targets 16 genes from the input gene list.Associations were determined from the following experiment:The full list of targets is available below:MRPL32 PSMA2 RPS27A HSP90B1 NDUFA3 ATP5J CSDE1 PABPC1 HIGD2A STARD10 UBL3 RPS7 ADSS RPS11 RPS13 ATP5J2" style="cursor: pointer; text-decoration: underline dotted;">16 targets
98	EZH2	0.9548	0	0	" title="Overlapping EnrichrTargets" data-content="EZH2 targets 3 genes from the input gene list.Associations were determined from the following experiment:The full list of targets is available below:WFDC2 F3 P4HB" style="cursor: pointer; text-decoration: underline dotted;">3 targets
99	GABPA	0.9589	0	0	" title="Overlapping EnrichrTargets" data-content="GABPA targets 30 genes from the input gene list.Associations were determined from the following experiment:The full list of targets is available below:HSP90B1 NACA SP3 TMBIM6 EIF3F COX8A VMP1 COX6A1 EEF1B2 COX6B1 HIGD2A TIMM8B RRS1 DNAJA1 RPS19 RPL36AL RPS13 SEC61G C1QBP RBM3 TMA7 NDUFC2 P4HB EIF4A1 ATP5J RPL4 RPS7 UQCR11 COX7A2 HSPD1" style="cur…
100	REST	0.9763	0	0	" title="Overlapping EnrichrTargets" data-content="REST targets 3 genes from the input gene list.Associations were determined from the following experiment:The full list of targets is available below:TFRC PTPRN ABHD2" style="cursor: pointer; text-decoration: underline dotted;">3 targets
101	REST	0.9923	0	0	" title="Overlapping EnrichrTargets" data-content="REST targets 14 genes from the input gene list.Associations were determined from the following experiment:The full list of targets is available below:ACAT2 PCBD1 SORL1 ATP5L PTPRN NPM1 ADM TUSC3 CDH2 PARM1 HLA-A SGK1 NR4A1 HK2" style="cursor: pointer; text-decoration: underline dotted;">14 targets
KEA
Rank	Protein Kinase	Hypergeometric p-value	Z-score	Combined score	Enriched Substrates
1	CSNK2A1	1.517e-26	0	0	" title="Overlapping EnrichrSubstrates" data-content="CSNK2A1 targets 65 genes from the input gene list.The full list of substrates is available below:ATF2 SPI1 EHMT2 DAXX CSNK2A1 ATF3 PPARGC1A JUN EZH2 NELFE FOS SIRT1 PPARG EGFR STAT3 MAX FOXO1 PIN1 SUMO1 SRF STUB1 EGR1 SMARCA4 RELA TFAP2A VDR TCF3 GSK3B TAF9 VHL RB1 TRRAP MYC MYB IER3 PRKDC HIF1A ING4 NCOR2 NCOR1 RPL11 CDKN2A USP7 TLE1 CUL2 CDK…
2	MAPK14	1.123e-23	0	0	" title="Overlapping EnrichrSubstrates" data-content="MAPK14 targets 51 genes from the input gene list.The full list of substrates is available below:ATF2 EHMT2 ATF3 PPARGC1A JUN EZH2 NELFE SIRT6 FOS EGFR STAT3 FOXO1 SP1 SP3 EGR1 SMARCA4 RELA NR3C1 TCF3 GSK3B VHL RB1 TRRAP MYC MYB IER3 PRKDC HIF1A ING4 NCOR2 NCOR1 CDKN2A TLE1 CDK2 BCL2 CHUK CEBPA CEBPB POLR2A KLF4 KAT5 SKP2 RUNX1 TWIST1 BANP PARP…
3	MAPK1	2.714e-23	0	0	" title="Overlapping EnrichrSubstrates" data-content="MAPK1 targets 45 genes from the input gene list.The full list of substrates is available below:RB1 ATF2 MYC MYB IER3 CSNK2A1 ATF3 HIF1A JUN EZH2 FOS NCOR2 PPARG EGFR CDKN2A STAT3 TLE1 FOXO1 SP1 CDK2 SP3 BCL2 CHUK CEBPA CEBPB CEBPD POLR2A KLF4 PML SKP2 RUNX1 TWIST1 BANP EGR1 PARP1 TUBB RELA RXRA NR3C1 SMAD2 SMAD4 SMAD3 TCF3 GSK3B MAPK1" style="…
4	MAPK3	1.632e-21	0	0	" title="Overlapping EnrichrSubstrates" data-content="MAPK3 targets 34 genes from the input gene list.The full list of substrates is available below:ATF2 MYC MYB IER3 RUNX1 ATF3 TWIST1 BANP EGR1 JUN FOS PPARG EGFR RXRA STAT3 NR3C1 FOXO1 SMAD2 SMAD4 SMAD3 SP1 CDK2 SP3 BCL2 GSK3B CHUK CEBPA CEBPB POLR2A E2F4 MAPK3 KLF4 PML STUB1" style="cursor: pointer; text-decoration: underline dotted;">34 substr…
5	CDK1	7.851e-21	0	0	" title="Overlapping EnrichrSubstrates" data-content="CDK1 targets 61 genes from the input gene list.The full list of substrates is available below:ATF2 EHMT2 CSNK2A1 GATA2 PPARGC1A JUN EZH2 NELFE SIRT6 FOS SIRT1 SIRT2 EGFR STAT3 CCNT1 FOXO1 NFKB1 SP1 SP3 E2F4 STUB1 EGR1 SMARCA4 RELA TCF3 GSK3B VHL RB1 TRRAP MYC MYB IER3 PRKDC HIF1A NCOR2 NCOR1 CDKN2A MEN1 USP7 CDK2 BCL2 CHUK RFC1 CEBPA CEBPB HDA…
6	MAPK8	1.022e-19	0	0	" title="Overlapping EnrichrSubstrates" data-content="MAPK8 targets 29 genes from the input gene list.The full list of substrates is available below:ATF2 SOX2 MYC MYB IER3 RUNX1 CTBP1 TWIST1 EGR1 JUN TUBB SIRT6 FOS SIRT1 PPARG EGFR RXRA SUZ12 CDKN2A STAT3 NR3C1 TLE1 TFAP2A SP1 BCL2 H2AFX MAPK1 KLF4 STUB1" style="cursor: pointer; text-decoration: underline dotted;">29 substrates
7	CDK4	4.785e-17	0	0	" title="Overlapping EnrichrSubstrates" data-content="CDK4 targets 22 genes from the input gene list.The full list of substrates is available below:RB1 ATF2 TRRAP MYC MYB SKP2 MAX FOXO1 SMAD2 JUN SMAD3 SP1 CDK2 BCL2 TCF3 SUMO1 PARP1 RFC1 CEBPA CEBPB CDKN2A STAT3" style="cursor: pointer; text-decoration: underline dotted;">22 substrates
8	GSK3B	6.451e-17	0	0	" title="Overlapping EnrichrSubstrates" data-content="GSK3B targets 62 genes from the input gene list.The full list of substrates is available below:ATF2 ATF3 GATA2 JUN FOS PPARG EGFR SP1 SP3 TP63 EGR1 SMARCA4 RELA NR3C1 TCF3 CARM1 NCOR2 NCOR1 CDKN2A TLE1 BCL2 RFC1 CEBPA CEBPB CEBPD POLR2A PML KAT5 TWIST1 TUBB MAPK1 EHMT2 DAXX EZH2 SIRT1 STAT3 CCNT1 FOXO1 NFKB1 NFKB2 GSK3B VHL RB1 TRRAP MYC MYB I…
9	AKT1	3.157e-16	0	0	" title="Overlapping EnrichrSubstrates" data-content="AKT1 targets 29 genes from the input gene list.The full list of substrates is available below:TRRAP SOX2 MYC CSNK2A1 TWIST1 GATA2 TERT PPARGC1A EGR1 JUN EZH2 SIRT6 FOS NCOR1 EGFR CDKN2A STAT3 NR3C1 PIAS2 FOXO1 SMAD4 SMAD3 SP1 CDK2 BCL2 TCF3 GSK3B CHUK MAPK1" style="cursor: pointer; text-decoration: underline dotted;">29 substrates
10	CDK2	8.536e-15	0	0	" title="Overlapping EnrichrSubstrates" data-content="CDK2 targets 64 genes from the input gene list.The full list of substrates is available below:ATF2 ATF3 JUN FOS EGFR SP1 SP3 E2F4 TP63 EGR1 SMARCA4 NR3C1 TFAP2A TCF3 PRKDC NCOR2 CDKN2A USP7 TLE1 BCL2 RFC1 CEBPB HDAC2 POLR2A PML KAT5 PARP1 TUBB H2AFX MAPK1 EHMT2 DAXX EZH2 NELFE SIRT6 SIRT2 STAT3 CCNT1 RUVBL2 FOXO1 SUMO1 SNIP1 GSK3B VHL RB1 MYC …
11	HIPK2	8.685e-15	0	0	" title="Overlapping EnrichrSubstrates" data-content="HIPK2 targets 20 genes from the input gene list.The full list of substrates is available below:MYC MYB TP63 TLE1 RUNX1 CTBP1 PRKDC HIF1A SMAD2 SMAD3 NFKB1 BCL2 SUMO1 CHUK PARP1 SIRT1 NCOR1 CEBPB RELA PML" style="cursor: pointer; text-decoration: underline dotted;">20 substrates
12	ERK2	6.386e-14	0	0	" title="Overlapping EnrichrSubstrates" data-content="ERK2 targets 20 genes from the input gene list.The full list of substrates is available below:RB1 ATF2 MYC MYB SMAD2 JUN SMAD4 SMAD3 NFKB1 SP1 BCL2 TCF3 FOS NCOR2 PPARG CEBPB SRF EGFR RELA STAT3" style="cursor: pointer; text-decoration: underline dotted;">20 substrates
13	ERK1	1.513e-13	0	0	" title="Overlapping EnrichrSubstrates" data-content="ERK1 targets 20 genes from the input gene list.The full list of substrates is available below:ATF2 KAT5 MYC PRKCD HIF1A SMAD2 JUN SMAD4 SMAD3 NFKB1 SP1 BCL2 TCF3 FOS NCOR2 CEBPB SRF EGFR RELA STAT3" style="cursor: pointer; text-decoration: underline dotted;">20 substrates
14	JNK1	2.781e-12	0	0	" title="Overlapping EnrichrSubstrates" data-content="JNK1 targets 15 genes from the input gene list.The full list of substrates is available below:ATF2 NR3C1 MYC FOS SIRT1 RUNX1 HIF1A RELA SMAD2 JUN SMAD3 STAT3 NFKB1 SP1 BCL2" style="cursor: pointer; text-decoration: underline dotted;">15 substrates
15	DNAPK	4.467e-11	0	0	" title="Overlapping EnrichrSubstrates" data-content="DNAPK targets 15 genes from the input gene list.The full list of substrates is available below:TRRAP SOX2 KAT5 PRKCD PRKDC SMAD2 JUN SMAD4 SP1 TCF3 CHUK PARP1 H2AFX SRF RELA" style="cursor: pointer; text-decoration: underline dotted;">15 substrates
16	ATM	1.026e-09	0	0	" title="Overlapping EnrichrSubstrates" data-content="ATM targets 19 genes from the input gene list.The full list of substrates is available below:RB1 ATF2 SMARCB1 SOX2 KAT5 TP63 DAXX PRKDC HIF1A EGR1 SMARCA4 EZH2 PARP1 MEN1 SP1 CDK2 RFC1 H2AFX VHL" style="cursor: pointer; text-decoration: underline dotted;">19 substrates
17	CK2ALPHA	4.609e-09	0	0	" title="Overlapping EnrichrSubstrates" data-content="CK2ALPHA targets 18 genes from the input gene list.The full list of substrates is available below:RB1 ATF2 SPI1 MYC MYB JUN SMARCA4 NCOR2 RELA TLE1 MAX VDR SP1 SUMO1 HDAC2 HDAC3 SRF PML" style="cursor: pointer; text-decoration: underline dotted;">18 substrates
18	ABL1	1.14e-08	0	0	" title="Overlapping EnrichrSubstrates" data-content="ABL1 targets 15 genes from the input gene list.The full list of substrates is available below:RB1 SPI1 KAT5 MYC TP63 PRKCD EGR1 JUN BCL2 FOS DDB1 CEBPB HDAC2 EGFR STAT3" style="cursor: pointer; text-decoration: underline dotted;">15 substrates
19	RPS6KA3	1.331e-08	0	0	" title="Overlapping EnrichrSubstrates" data-content="RPS6KA3 targets 19 genes from the input gene list.The full list of substrates is available below:TRRAP MYC MYB IER3 PRKDC EGR1 JUN TUBB FOS NCOR2 KAT2B EGFR CDKN2A STAT3 SMAD3 BCL2 GSK3B CHUK MAPK3" style="cursor: pointer; text-decoration: underline dotted;">19 substrates
20	JNK2	2.886e-08	0	0	" title="Overlapping EnrichrSubstrates" data-content="JNK2 targets 8 genes from the input gene list.The full list of substrates is available below:RB1 ATF2 PRKDC RELA MYC SMAD2 JUN FOS" style="cursor: pointer; text-decoration: underline dotted;">8 substrates
21	RAF1	3.949e-08	0	0	" title="Overlapping EnrichrSubstrates" data-content="RAF1 targets 13 genes from the input gene list.The full list of substrates is available below:RB1 NR3C1 MYC MYB PRKCD EGR1 NFKB1 BCL2 PIN1 PARP1 FOS MAPK1 MAPK3" style="cursor: pointer; text-decoration: underline dotted;">13 substrates
22	PRKDC	5.236e-08	0	0	" title="Overlapping EnrichrSubstrates" data-content="PRKDC targets 12 genes from the input gene list.The full list of substrates is available below:TRRAP MYC SKP2 PRKDC EGR1 NFKB1 NFKB2 H2AFX SRF EGFR RELA POLR2A" style="cursor: pointer; text-decoration: underline dotted;">12 substrates
23	PKBALPHA	2.587e-07	0	0	" title="Overlapping EnrichrSubstrates" data-content="PKBALPHA targets 15 genes from the input gene list.The full list of substrates is available below:MYC SKP2 CTBP1 PRKDC TERT PPARGC1A EZH2 NCOR2 RELA FOXO1 SMAD2 SMAD3 NFKB1 GSK3B CHUK" style="cursor: pointer; text-decoration: underline dotted;">15 substrates
24	SRC	2.945e-07	0	0	" title="Overlapping EnrichrSubstrates" data-content="SRC targets 22 genes from the input gene list.The full list of substrates is available below:RB1 SPI1 MYC MYB PRKCD TERT JUN FOS PPARG EGFR STAT3 NFKB1 BCL2 CEBPB E2F4 KLF4 RUNX1 EGR1 TUBB PPP2CA SMAD3 MAPK1" style="cursor: pointer; text-decoration: underline dotted;">22 substrates
25	PRKACA	4.472e-07	0	0	" title="Overlapping EnrichrSubstrates" data-content="PRKACA targets 34 genes from the input gene list.The full list of substrates is available below:SPI1 ATF3 PPARGC1A JUN FOS DDB1 EGFR STAT3 NFKB1 PIN1 SRF TBX2 EGR1 RELA RXRA TFAP2A VDR GSK3B RB1 MYC MYB HIF1A NCOR2 NCOR1 CDKN2A TLE1 BCL2 CEBPB HDAC7 KLF4 TUBB SMAD4 SMAD3 MAPK1" style="cursor: pointer; text-decoration: underline dotted;">34 sub…
26	CK2	5.47e-07	0	0	" title="Overlapping EnrichrSubstrates" data-content="CK2 targets 9 genes from the input gene list.The full list of substrates is available below:SPI1 MYB TLE1 HDAC2 MAX SRF RELA JUN VDR" style="cursor: pointer; text-decoration: underline dotted;">9 substrates
27	CSNK2A2	5.926e-07	0	0	" title="Overlapping EnrichrSubstrates" data-content="CSNK2A2 targets 12 genes from the input gene list.The full list of substrates is available below:TRRAP SOX2 MYC EGR1 JUN CDK2 BCL2 NELFE TUBB FOS RPL11 EGFR" style="cursor: pointer; text-decoration: underline dotted;">12 substrates
28	GSK3BETA	8.991e-07	0	0	" title="Overlapping EnrichrSubstrates" data-content="GSK3BETA targets 12 genes from the input gene list.The full list of substrates is available below:MYC FOXO1 PPARGC1A JUN SMAD3 NFKB1 BCL2 PIN1 GSK3B PARP1 CEBPB STAT3" style="cursor: pointer; text-decoration: underline dotted;">12 substrates
29	MAPK11	1.052e-06	0	0	" title="Overlapping EnrichrSubstrates" data-content="MAPK11 targets 11 genes from the input gene list.The full list of substrates is available below:ATF2 NR3C1 PPARGC1A JUN NFKB1 BCL2 FOS CEBPB SRF EGFR PML" style="cursor: pointer; text-decoration: underline dotted;">11 substrates
30	CHUK	3.072e-06	0	0	" title="Overlapping EnrichrSubstrates" data-content="CHUK targets 9 genes from the input gene list.The full list of substrates is available below:MYC BTRC IKBKE TUBB NCOR2 NCOR1 RELA NFKB1 NFKB2" style="cursor: pointer; text-decoration: underline dotted;">9 substrates
31	IKK	3.314e-06	0	0	" title="Overlapping EnrichrSubstrates" data-content="IKK targets 4 genes from the input gene list.The full list of substrates is available below:NCOR2 NFKB1 RELA NFKB2" style="cursor: pointer; text-decoration: underline dotted;">4 substrates
32	MAPK9	4.761e-06	0	0	" title="Overlapping EnrichrSubstrates" data-content="MAPK9 targets 9 genes from the input gene list.The full list of substrates is available below:ATF2 MYC H2AFX FOS EGFR RXRA EGR1 JUN STAT3" style="cursor: pointer; text-decoration: underline dotted;">9 substrates
33	CDC2	7.311e-06	0	0	" title="Overlapping EnrichrSubstrates" data-content="CDC2 targets 15 genes from the input gene list.The full list of substrates is available below:RB1 KAT5 MYC SKP2 CSNK2A1 PRKDC JUN EZH2 PARP1 FOS NCOR1 RELA STAT3 FOXO1 BCL2" style="cursor: pointer; text-decoration: underline dotted;">15 substrates
34	MAP2K1	8.733e-06	0	0	" title="Overlapping EnrichrSubstrates" data-content="MAP2K1 targets 8 genes from the input gene list.The full list of substrates is available below:GSK3B MYC FOS PPARG EGFR MAPK1 MAPK3 STAT3" style="cursor: pointer; text-decoration: underline dotted;">8 substrates
35	CDK9	1.162e-05	0	0	" title="Overlapping EnrichrSubstrates" data-content="CDK9 targets 6 genes from the input gene list.The full list of substrates is available below:RB1 CCNT1 POLR2A SMAD3 CDK9 PPARG" style="cursor: pointer; text-decoration: underline dotted;">6 substrates
36	DNA	1.263e-05	0	0	" title="Overlapping EnrichrSubstrates" data-content="DNA targets 4 genes from the input gene list.The full list of substrates is available below:JUN PRKDC SRF NR3C1" style="cursor: pointer; text-decoration: underline dotted;">4 substrates
37	MAPK10	1.462e-05	0	0	" title="Overlapping EnrichrSubstrates" data-content="MAPK10 targets 7 genes from the input gene list.The full list of substrates is available below:MYC FOS EGFR EGR1 JUN CDKN2A BCL2" style="cursor: pointer; text-decoration: underline dotted;">7 substrates
38	RPS6KA1	1.776e-05	0	0	" title="Overlapping EnrichrSubstrates" data-content="RPS6KA1 targets 8 genes from the input gene list.The full list of substrates is available below:GSK3B FOS CEBPB SRF MAPK1 MAPK3 EGR1 JUN" style="cursor: pointer; text-decoration: underline dotted;">8 substrates
39	PRKCA	2.35e-05	0	0	" title="Overlapping EnrichrSubstrates" data-content="PRKCA targets 28 genes from the input gene list.The full list of substrates is available below:ATF2 SPI1 JUN FOS EGFR STAT3 NFKB1 SRF STUB1 EGR1 RELA VDR GSK3B ELF3 RB1 MYC MYB IER3 NCOR2 NCOR1 CDKN2A CDK9 BCL2 CEBPB KLF4 TUBB SMAD3 MAPK1" style="cursor: pointer; text-decoration: underline dotted;">28 substrates
40	IKKALPHA	2.694e-05	0	0	" title="Overlapping EnrichrSubstrates" data-content="IKKALPHA targets 5 genes from the input gene list.The full list of substrates is available below:CHUK NFKB1 RELA NFKB2 NCOR2" style="cursor: pointer; text-decoration: underline dotted;">5 substrates
41	IKBKB	3.624e-05	0	0	" title="Overlapping EnrichrSubstrates" data-content="IKBKB targets 8 genes from the input gene list.The full list of substrates is available below:IKBKE TP63 PARP1 TUBB FOS RELA CDKN2A NFKB1" style="cursor: pointer; text-decoration: underline dotted;">8 substrates
42	IKKBETA	5.428e-05	0	0	" title="Overlapping EnrichrSubstrates" data-content="IKKBETA targets 6 genes from the input gene list.The full list of substrates is available below:RELA CHUK STAT3 FOS NFKB1 NFKB2" style="cursor: pointer; text-decoration: underline dotted;">6 substrates
43	PKBGAMMA	6.176e-05	0	0	" title="Overlapping EnrichrSubstrates" data-content="PKBGAMMA targets 5 genes from the input gene list.The full list of substrates is available below:GSK3B FOXO1 RELA CHUK NFKB1" style="cursor: pointer; text-decoration: underline dotted;">5 substrates
44	TGFBR2	7.182e-05	0	0	" title="Overlapping EnrichrSubstrates" data-content="TGFBR2 targets 7 genes from the input gene list.The full list of substrates is available below:MYC SMAD2 EGR1 SMAD3 NFKB1 PML SP1" style="cursor: pointer; text-decoration: underline dotted;">7 substrates
45	GSK3ALPHA	9.177e-05	0	0	" title="Overlapping EnrichrSubstrates" data-content="GSK3ALPHA targets 6 genes from the input gene list.The full list of substrates is available below:GSK3B MYC PARP1 FOXO1 JUN NFKB1" style="cursor: pointer; text-decoration: underline dotted;">6 substrates
46	IKBKE	0.0001329	0	0	" title="Overlapping EnrichrSubstrates" data-content="IKBKE targets 7 genes from the input gene list.The full list of substrates is available below:BTRC IKBKE SKP1 TUBB CUL1 RELA NFKB1" style="cursor: pointer; text-decoration: underline dotted;">7 substrates
47	PRKCZ	0.0001646	0	0	" title="Overlapping EnrichrSubstrates" data-content="PRKCZ targets 7 genes from the input gene list.The full list of substrates is available below:GSK3B RELA MAPK1 MAPK3 STAT3 SP1 PIN1" style="cursor: pointer; text-decoration: underline dotted;">7 substrates
48	PRKCD	0.0001661	0	0	" title="Overlapping EnrichrSubstrates" data-content="PRKCD targets 9 genes from the input gene list.The full list of substrates is available below:PRKCD PRKDC EGR1 JUN GSK3B FOS MAPK1 MAPK3 STAT3" style="cursor: pointer; text-decoration: underline dotted;">9 substrates
49	CHEK1	0.0001818	0	0	" title="Overlapping EnrichrSubstrates" data-content="CHEK1 targets 11 genes from the input gene list.The full list of substrates is available below:RB1 SOX2 MYC SKP2 EZH2 NELFE TUBB FOS NFKB1 H2AFX E2F4" style="cursor: pointer; text-decoration: underline dotted;">11 substrates
50	CDK5	0.0002405	0	0	" title="Overlapping EnrichrSubstrates" data-content="CDK5 targets 10 genes from the input gene list.The full list of substrates is available below:RB1 NR3C1 MYC HIF1A FOXO1 BCL2 GSK3B PPARG STAT3 STUB1" style="cursor: pointer; text-decoration: underline dotted;">10 substrates
51	EGFR	0.0002717	0	0	" title="Overlapping EnrichrSubstrates" data-content="EGFR targets 10 genes from the input gene list.The full list of substrates is available below:PRKCD PRKDC EGR1 JUN IKBKE FOS PPARG EGFR PPP2CA STAT3" style="cursor: pointer; text-decoration: underline dotted;">10 substrates
52	PKBBETA	0.0005554	0	0	" title="Overlapping EnrichrSubstrates" data-content="PKBBETA targets 5 genes from the input gene list.The full list of substrates is available below:GSK3B FOXO1 RELA CHUK NFKB1" style="cursor: pointer; text-decoration: underline dotted;">5 substrates
53	GSK	0.0007501	0	0	" title="Overlapping EnrichrSubstrates" data-content="GSK targets 4 genes from the input gene list.The full list of substrates is available below:CEBPB RELA MYC NFKB1" style="cursor: pointer; text-decoration: underline dotted;">4 substrates
54	ADRBK1	0.0008827	0	0	" title="Overlapping EnrichrSubstrates" data-content="ADRBK1 targets 3 genes from the input gene list.The full list of substrates is available below:PRKCD EGFR MAPK3" style="cursor: pointer; text-decoration: underline dotted;">3 substrates
55	PKCEPSILON	0.0009307	0	0	" title="Overlapping EnrichrSubstrates" data-content="PKCEPSILON targets 6 genes from the input gene list.The full list of substrates is available below:PRKCD MAPK1 MAPK3 NFKB1 SP1 BCL2" style="cursor: pointer; text-decoration: underline dotted;">6 substrates
56	ATR	0.001453	0	0	" title="Overlapping EnrichrSubstrates" data-content="ATR targets 7 genes from the input gene list.The full list of substrates is available below:DAXX PRKDC CDK9 SP1 H2AFX CDKN2A PML" style="cursor: pointer; text-decoration: underline dotted;">7 substrates
57	PKD1	0.001653	0	0	" title="Overlapping EnrichrSubstrates" data-content="PKD1 targets 5 genes from the input gene list.The full list of substrates is available below:MYB EGFR HDAC7 JUN NFKB1" style="cursor: pointer; text-decoration: underline dotted;">5 substrates
58	PLK3	0.002306	0	0	" title="Overlapping EnrichrSubstrates" data-content="PLK3 targets 4 genes from the input gene list.The full list of substrates is available below:ATF2 HIF1A JUN ATF3" style="cursor: pointer; text-decoration: underline dotted;">4 substrates
59	DYRK2	0.002306	0	0	" title="Overlapping EnrichrSubstrates" data-content="DYRK2 targets 4 genes from the input gene list.The full list of substrates is available below:TERT MYC JUN STAT3" style="cursor: pointer; text-decoration: underline dotted;">4 substrates
60	PDGFRBETA	0.002511	0	0	" title="Overlapping EnrichrSubstrates" data-content="PDGFRBETA targets 4 genes from the input gene list.The full list of substrates is available below:MAX EGFR PRKCD STAT3" style="cursor: pointer; text-decoration: underline dotted;">4 substrates
61	DYRK1A	0.002729	0	0	" title="Overlapping EnrichrSubstrates" data-content="DYRK1A targets 4 genes from the input gene list.The full list of substrates is available below:FOXO1 POLR2A SIRT1 RUNX1" style="cursor: pointer; text-decoration: underline dotted;">4 substrates
62	PDHK1	0.002909	0	0	" title="Overlapping EnrichrSubstrates" data-content="PDHK1 targets 5 genes from the input gene list.The full list of substrates is available below:GSK3B CHUK PRKCD EGFR FOXO1" style="cursor: pointer; text-decoration: underline dotted;">5 substrates
63	CSNK2B	0.003184	0	0	" title="Overlapping EnrichrSubstrates" data-content="CSNK2B targets 3 genes from the input gene list.The full list of substrates is available below:SIRT6 FOS RUVBL2" style="cursor: pointer; text-decoration: underline dotted;">3 substrates
64	PKCIOTA	0.003459	0	0	" title="Overlapping EnrichrSubstrates" data-content="PKCIOTA targets 4 genes from the input gene list.The full list of substrates is available below:RELA RUVBL2 CHUK NFKB1" style="cursor: pointer; text-decoration: underline dotted;">4 substrates
65	NLK	0.003729	0	0	" title="Overlapping EnrichrSubstrates" data-content="NLK targets 4 genes from the input gene list.The full list of substrates is available below:FOXO1 MYB SMAD4 STAT3" style="cursor: pointer; text-decoration: underline dotted;">4 substrates
66	MTOR	0.004387	0	0	" title="Overlapping EnrichrSubstrates" data-content="MTOR targets 6 genes from the input gene list.The full list of substrates is available below:EHMT2 MYC JUN POLR2A STAT3 CHFR" style="cursor: pointer; text-decoration: underline dotted;">6 substrates
67	PRKCI	0.004624	0	0	" title="Overlapping EnrichrSubstrates" data-content="PRKCI targets 4 genes from the input gene list.The full list of substrates is available below:DDB1 ELF3 SP1 EZH2" style="cursor: pointer; text-decoration: underline dotted;">4 substrates
68	MAP2K3	0.004624	0	0	" title="Overlapping EnrichrSubstrates" data-content="MAP2K3 targets 4 genes from the input gene list.The full list of substrates is available below:MAPK3 SMAD2 SMAD4 SMAD3" style="cursor: pointer; text-decoration: underline dotted;">4 substrates
69	TBK1	0.004744	0	0	" title="Overlapping EnrichrSubstrates" data-content="TBK1 targets 5 genes from the input gene list.The full list of substrates is available below:RUVBL2 TUBB RPL11 RELA STAT3" style="cursor: pointer; text-decoration: underline dotted;">5 substrates
70	PKCTHETA	0.005654	0	0	" title="Overlapping EnrichrSubstrates" data-content="PKCTHETA targets 4 genes from the input gene list.The full list of substrates is available below:CHUK PRKCD MAPK1 MAPK3" style="cursor: pointer; text-decoration: underline dotted;">4 substrates
71	RSK3	0.005746	0	0	" title="Overlapping EnrichrSubstrates" data-content="RSK3 targets 2 genes from the input gene list.The full list of substrates is available below:MAPK1 MAPK3" style="cursor: pointer; text-decoration: underline dotted;">2 substrates
72	JAK2	0.006029	0	0	" title="Overlapping EnrichrSubstrates" data-content="JAK2 targets 4 genes from the input gene list.The full list of substrates is available below:MAPK1 MAPK3 STAT3 EZH2" style="cursor: pointer; text-decoration: underline dotted;">4 substrates
73	MOK	0.006208	0	0	" title="Overlapping EnrichrSubstrates" data-content="MOK targets 3 genes from the input gene list.The full list of substrates is available below:MYC JUN NFKB1" style="cursor: pointer; text-decoration: underline dotted;">3 substrates
74	CK1ALPHA	0.006652	0	0	" title="Overlapping EnrichrSubstrates" data-content="CK1ALPHA targets 5 genes from the input gene list.The full list of substrates is available below:RB1 GSK3B FOS JUN NFKB1" style="cursor: pointer; text-decoration: underline dotted;">5 substrates
75	MELK	0.006833	0	0	" title="Overlapping EnrichrSubstrates" data-content="MELK targets 3 genes from the input gene list.The full list of substrates is available below:SMAD2 SMAD4 SMAD3" style="cursor: pointer; text-decoration: underline dotted;">3 substrates
76	MAP3K14	0.008084	0	0	" title="Overlapping EnrichrSubstrates" data-content="MAP3K14 targets 6 genes from the input gene list.The full list of substrates is available below:RUVBL2 NFKB2 CHUK TUBB RPL11 STUB1" style="cursor: pointer; text-decoration: underline dotted;">6 substrates
77	CDK6	0.008191	0	0	" title="Overlapping EnrichrSubstrates" data-content="CDK6 targets 3 genes from the input gene list.The full list of substrates is available below:RB1 CEBPA RUNX1" style="cursor: pointer; text-decoration: underline dotted;">3 substrates
78	PKCALPHA	0.008971	0	0	" title="Overlapping EnrichrSubstrates" data-content="PKCALPHA targets 6 genes from the input gene list.The full list of substrates is available below:MYC PRKCD NFKB1 BCL2 GSK3B EGFR" style="cursor: pointer; text-decoration: underline dotted;">6 substrates
79	CDK3	0.009698	0	0	" title="Overlapping EnrichrSubstrates" data-content="CDK3 targets 3 genes from the input gene list.The full list of substrates is available below:RB1 JUN CDK2" style="cursor: pointer; text-decoration: underline dotted;">3 substrates
80	CSNK1E	0.01016	0	0	" title="Overlapping EnrichrSubstrates" data-content="CSNK1E targets 4 genes from the input gene list.The full list of substrates is available below:MYC TUBB CDKN2A SMARCA4" style="cursor: pointer; text-decoration: underline dotted;">4 substrates
81	CAMKIV	0.01027	0	0	" title="Overlapping EnrichrSubstrates" data-content="CAMKIV targets 2 genes from the input gene list.The full list of substrates is available below:SRF RELA" style="cursor: pointer; text-decoration: underline dotted;">2 substrates
82	CK2A2	0.01071	0	0	" title="Overlapping EnrichrSubstrates" data-content="CK2A2 targets 4 genes from the input gene list.The full list of substrates is available below:MYC HDAC2 RELA JUN" style="cursor: pointer; text-decoration: underline dotted;">4 substrates
83	MAP3K7	0.01108	0	0	" title="Overlapping EnrichrSubstrates" data-content="MAP3K7 targets 5 genes from the input gene list.The full list of substrates is available below:RUVBL2 SMAD3 TUBB HDAC7 E2F4" style="cursor: pointer; text-decoration: underline dotted;">5 substrates
84	RPS6KB1	0.01441	0	0	" title="Overlapping EnrichrSubstrates" data-content="RPS6KB1 targets 4 genes from the input gene list.The full list of substrates is available below:GSK3B TP63 PPARGC1A CDKN2A" style="cursor: pointer; text-decoration: underline dotted;">4 substrates
85	PRKAA1	0.01495	0	0	" title="Overlapping EnrichrSubstrates" data-content="PRKAA1 targets 5 genes from the input gene list.The full list of substrates is available below:RB1 CTBP1 FOXO1 SIRT2 EGFR" style="cursor: pointer; text-decoration: underline dotted;">5 substrates
86	RET	0.01513	0	0	" title="Overlapping EnrichrSubstrates" data-content="RET targets 3 genes from the input gene list.The full list of substrates is available below:MAPK1 MAPK3 STAT3" style="cursor: pointer; text-decoration: underline dotted;">3 substrates
87	PRKD1	0.01804	0	0	" title="Overlapping EnrichrSubstrates" data-content="PRKD1 targets 4 genes from the input gene list.The full list of substrates is available below:EGFR HDAC7 TFAP2A JUN" style="cursor: pointer; text-decoration: underline dotted;">4 substrates
88	ACTR2B	0.01805	0	0	" title="Overlapping EnrichrSubstrates" data-content="ACTR2B targets 2 genes from the input gene list.The full list of substrates is available below:SMAD2 SMAD3" style="cursor: pointer; text-decoration: underline dotted;">2 substrates
89	PRKAA2	0.01838	0	0	" title="Overlapping EnrichrSubstrates" data-content="PRKAA2 targets 3 genes from the input gene list.The full list of substrates is available below:PPARGC1A TFAP2A PARP1" style="cursor: pointer; text-decoration: underline dotted;">3 substrates
90	RPS6KA5	0.01954	0	0	" title="Overlapping EnrichrSubstrates" data-content="RPS6KA5 targets 3 genes from the input gene list.The full list of substrates is available below:SRF RELA STAT3" style="cursor: pointer; text-decoration: underline dotted;">3 substrates
91	PKR	0.02074	0	0	" title="Overlapping EnrichrSubstrates" data-content="PKR targets 3 genes from the input gene list.The full list of substrates is available below:CHUK STAT3 NFKB1" style="cursor: pointer; text-decoration: underline dotted;">3 substrates
92	BARK1	0.02133	0	0	" title="Overlapping EnrichrSubstrates" data-content="BARK1 targets 4 genes from the input gene list.The full list of substrates is available below:PRKCD EGFR MAPK3 PIN1" style="cursor: pointer; text-decoration: underline dotted;">4 substrates
93	PRKCB	0.02184	0	0	" title="Overlapping EnrichrSubstrates" data-content="PRKCB targets 7 genes from the input gene list.The full list of substrates is available below:ATF2 RUNX1 EGR1 JUN STAT3 BCL2 GSK3B" style="cursor: pointer; text-decoration: underline dotted;">7 substrates
94	PAK1	0.0223	0	0	" title="Overlapping EnrichrSubstrates" data-content="PAK1 targets 5 genes from the input gene list.The full list of substrates is available below:PRKCD CTBP1 FOXO1 ELF3 EGFR" style="cursor: pointer; text-decoration: underline dotted;">5 substrates
95	LCK	0.02499	0	0	" title="Overlapping EnrichrSubstrates" data-content="LCK targets 6 genes from the input gene list.The full list of substrates is available below:SPI1 PRKCD EGR1 PPP2CA MAPK1 MAPK3" style="cursor: pointer; text-decoration: underline dotted;">6 substrates
96	CDKN1B	0.02599	0	0	" title="Overlapping EnrichrSubstrates" data-content="CDKN1B targets 1 genes from the input gene list.The full list of substrates is available below:CDK2" style="cursor: pointer; text-decoration: underline dotted;">1 substrates
97	BAZ1B	0.02599	0	0	" title="Overlapping EnrichrSubstrates" data-content="BAZ1B targets 1 genes from the input gene list.The full list of substrates is available below:H2AFX" style="cursor: pointer; text-decoration: underline dotted;">1 substrates
98	TRIM33	0.02599	0	0	" title="Overlapping EnrichrSubstrates" data-content="TRIM33 targets 1 genes from the input gene list.The full list of substrates is available below:SMAD4" style="cursor: pointer; text-decoration: underline dotted;">1 substrates
99	PCNA	0.02599	0	0	" title="Overlapping EnrichrSubstrates" data-content="PCNA targets 1 genes from the input gene list.The full list of substrates is available below:CDK2" style="cursor: pointer; text-decoration: underline dotted;">1 substrates
100	EP400	0.02599	0	0	" title="Overlapping EnrichrSubstrates" data-content="EP400 targets 1 genes from the input gene list.The full list of substrates is available below:TRRAP" style="cursor: pointer; text-decoration: underline dotted;">1 substrates
101	LYK5	0.02599	0	0	" title="Overlapping EnrichrSubstrates" data-content="LYK5 targets 1 genes from the input gene list.The full list of substrates is available below:SMAD4" style="cursor: pointer; text-decoration: underline dotted;">1 substrates
102	CHEK2	0.03026	0	0	" title="Overlapping EnrichrSubstrates" data-content="CHEK2 targets 3 genes from the input gene list.The full list of substrates is available below:RB1 VHL PML" style="cursor: pointer; text-decoration: underline dotted;">3 substrates
103	GSK3A	0.03178	0	0	" title="Overlapping EnrichrSubstrates" data-content="GSK3A targets 3 genes from the input gene list.The full list of substrates is available below:MYC CEBPA CEBPB" style="cursor: pointer; text-decoration: underline dotted;">3 substrates
104	DMPK	0.03302	0	0	" title="Overlapping EnrichrSubstrates" data-content="DMPK targets 2 genes from the input gene list.The full list of substrates is available below:SRF SP1" style="cursor: pointer; text-decoration: underline dotted;">2 substrates
105	PKN3	0.03302	0	0	" title="Overlapping EnrichrSubstrates" data-content="PKN3 targets 2 genes from the input gene list.The full list of substrates is available below:GATA2 EGFR" style="cursor: pointer; text-decoration: underline dotted;">2 substrates
106	PKA	0.03302	0	0	" title="Overlapping EnrichrSubstrates" data-content="PKA targets 2 genes from the input gene list.The full list of substrates is available below:GSK3B RELA" style="cursor: pointer; text-decoration: underline dotted;">2 substrates
107	MAP3K4	0.03587	0	0	" title="Overlapping EnrichrSubstrates" data-content="MAP3K4 targets 2 genes from the input gene list.The full list of substrates is available below:TRRAP CARM1" style="cursor: pointer; text-decoration: underline dotted;">2 substrates
108	PIM1	0.03657	0	0	" title="Overlapping EnrichrSubstrates" data-content="PIM1 targets 3 genes from the input gene list.The full list of substrates is available below:MYC SKP2 RELA" style="cursor: pointer; text-decoration: underline dotted;">3 substrates
109	HIPK1	0.0388	0	0	" title="Overlapping EnrichrSubstrates" data-content="HIPK1 targets 2 genes from the input gene list.The full list of substrates is available below:DAXX MYB" style="cursor: pointer; text-decoration: underline dotted;">2 substrates
110	PBK	0.04493	0	0	" title="Overlapping EnrichrSubstrates" data-content="PBK targets 2 genes from the input gene list.The full list of substrates is available below:E2F4 JUN" style="cursor: pointer; text-decoration: underline dotted;">2 substrates
111	PKAGAMMA	0.04533	0	0	" title="Overlapping EnrichrSubstrates" data-content="PKAGAMMA targets 3 genes from the input gene list.The full list of substrates is available below:NR3C1 RELA NFKB1" style="cursor: pointer; text-decoration: underline dotted;">3 substrates
112	AKT2	0.0491	0	0	" title="Overlapping EnrichrSubstrates" data-content="AKT2 targets 3 genes from the input gene list.The full list of substrates is available below:GSK3B CHUK PPARGC1A" style="cursor: pointer; text-decoration: underline dotted;">3 substrates
113	CAMKIIALPHA	0.0491	0	0	" title="Overlapping EnrichrSubstrates" data-content="CAMKIIALPHA targets 3 genes from the input gene list.The full list of substrates is available below:CEBPB SRF EGFR" style="cursor: pointer; text-decoration: underline dotted;">3 substrates
114	VRK1	0.05138	0	0	" title="Overlapping EnrichrSubstrates" data-content="VRK1 targets 2 genes from the input gene list.The full list of substrates is available below:ATF2 JUN" style="cursor: pointer; text-decoration: underline dotted;">2 substrates
115	RPS6KA2	0.05138	0	0	" title="Overlapping EnrichrSubstrates" data-content="RPS6KA2 targets 2 genes from the input gene list.The full list of substrates is available below:GSK3B MAPK3" style="cursor: pointer; text-decoration: underline dotted;">2 substrates
116	MKNK1	0.05138	0	0	" title="Overlapping EnrichrSubstrates" data-content="MKNK1 targets 2 genes from the input gene list.The full list of substrates is available below:MAPK3 CHFR" style="cursor: pointer; text-decoration: underline dotted;">2 substrates
117	AKT3	0.05815	0	0	" title="Overlapping EnrichrSubstrates" data-content="AKT3 targets 2 genes from the input gene list.The full list of substrates is available below:GSK3B PRKCD" style="cursor: pointer; text-decoration: underline dotted;">2 substrates
118	CDK8	0.05815	0	0	" title="Overlapping EnrichrSubstrates" data-content="CDK8 targets 2 genes from the input gene list.The full list of substrates is available below:SMAD3 STAT3" style="cursor: pointer; text-decoration: underline dotted;">2 substrates
119	LYN	0.06086	0	0	" title="Overlapping EnrichrSubstrates" data-content="LYN targets 5 genes from the input gene list.The full list of substrates is available below:SPI1 MYC CSNK2A1 PRKCD PPP2CA" style="cursor: pointer; text-decoration: underline dotted;">5 substrates
120	PRKCQ	0.0613	0	0	" title="Overlapping EnrichrSubstrates" data-content="PRKCQ targets 3 genes from the input gene list.The full list of substrates is available below:SPI1 CHUK SIRT2" style="cursor: pointer; text-decoration: underline dotted;">3 substrates
121	UHMK1	0.06164	0	0	" title="Overlapping EnrichrSubstrates" data-content="UHMK1 targets 2 genes from the input gene list.The full list of substrates is available below:SMAD2 SMAD4" style="cursor: pointer; text-decoration: underline dotted;">2 substrates
122	MAPK7	0.06164	0	0	" title="Overlapping EnrichrSubstrates" data-content="MAPK7 targets 2 genes from the input gene list.The full list of substrates is available below:FOS PML" style="cursor: pointer; text-decoration: underline dotted;">2 substrates
123	CAMK2D	0.06521	0	0	" title="Overlapping EnrichrSubstrates" data-content="CAMK2D targets 2 genes from the input gene list.The full list of substrates is available below:GSK3B SMAD4" style="cursor: pointer; text-decoration: underline dotted;">2 substrates
124	DAPK1	0.07254	0	0	" title="Overlapping EnrichrSubstrates" data-content="DAPK1 targets 2 genes from the input gene list.The full list of substrates is available below:MAPK3 PIN1" style="cursor: pointer; text-decoration: underline dotted;">2 substrates
125	EIF2AK2	0.07254	0	0	" title="Overlapping EnrichrSubstrates" data-content="EIF2AK2 targets 2 genes from the input gene list.The full list of substrates is available below:CHUK RUNX1" style="cursor: pointer; text-decoration: underline dotted;">2 substrates
126	PKM	0.07598	0	0	" title="Overlapping EnrichrSubstrates" data-content="PKM targets 1 genes from the input gene list.The full list of substrates is available below:STAT3" style="cursor: pointer; text-decoration: underline dotted;">1 substrates
127	TYK2	0.07712	0	0	" title="Overlapping EnrichrSubstrates" data-content="TYK2 targets 3 genes from the input gene list.The full list of substrates is available below:STAT3 NFKB1 NFKB2" style="cursor: pointer; text-decoration: underline dotted;">3 substrates
128	MAPK13	0.07952	0	0	" title="Overlapping EnrichrSubstrates" data-content="MAPK13 targets 3 genes from the input gene list.The full list of substrates is available below:ATF2 FOS JUN" style="cursor: pointer; text-decoration: underline dotted;">3 substrates
129	CSK	0.08011	0	0	" title="Overlapping EnrichrSubstrates" data-content="CSK targets 2 genes from the input gene list.The full list of substrates is available below:EGFR PML" style="cursor: pointer; text-decoration: underline dotted;">2 substrates
130	CDK7	0.08195	0	0	" title="Overlapping EnrichrSubstrates" data-content="CDK7 targets 3 genes from the input gene list.The full list of substrates is available below:POLR2A CDK9 CDK2" style="cursor: pointer; text-decoration: underline dotted;">3 substrates
131	MAP3K5	0.08399	0	0	" title="Overlapping EnrichrSubstrates" data-content="MAP3K5 targets 2 genes from the input gene list.The full list of substrates is available below:IKBKE DAXX" style="cursor: pointer; text-decoration: underline dotted;">2 substrates
132	PAK2	0.0844	0	0	" title="Overlapping EnrichrSubstrates" data-content="PAK2 targets 3 genes from the input gene list.The full list of substrates is available below:MYC SMAD2 JUN" style="cursor: pointer; text-decoration: underline dotted;">3 substrates
133	NIK	0.08808	0	0	" title="Overlapping EnrichrSubstrates" data-content="NIK targets 1 genes from the input gene list.The full list of substrates is available below:CEBPB" style="cursor: pointer; text-decoration: underline dotted;">1 substrates
134	HSPB8	0.08808	0	0	" title="Overlapping EnrichrSubstrates" data-content="HSPB8 targets 1 genes from the input gene list.The full list of substrates is available below:MAPK3" style="cursor: pointer; text-decoration: underline dotted;">1 substrates
135	CAMK2A	0.08844	0	0	" title="Overlapping EnrichrSubstrates" data-content="CAMK2A targets 4 genes from the input gene list.The full list of substrates is available below:MYC SMAD2 NCOR2 SRF" style="cursor: pointer; text-decoration: underline dotted;">4 substrates
136	INSR	0.08942	0	0	" title="Overlapping EnrichrSubstrates" data-content="INSR targets 3 genes from the input gene list.The full list of substrates is available below:FOS PPP2CA JUN" style="cursor: pointer; text-decoration: underline dotted;">3 substrates
137	ALK	0.09192	0	0	" title="Overlapping EnrichrSubstrates" data-content="ALK targets 2 genes from the input gene list.The full list of substrates is available below:RELA STAT3" style="cursor: pointer; text-decoration: underline dotted;">2 substrates
138	PRKCE	0.09455	0	0	" title="Overlapping EnrichrSubstrates" data-content="PRKCE targets 3 genes from the input gene list.The full list of substrates is available below:ATF2 MAPK3 STAT3" style="cursor: pointer; text-decoration: underline dotted;">3 substrates
139	MARK2	0.09596	0	0	" title="Overlapping EnrichrSubstrates" data-content="MARK2 targets 2 genes from the input gene list.The full list of substrates is available below:GSK3B HDAC7" style="cursor: pointer; text-decoration: underline dotted;">2 substrates
140	CSNK1A1	0.09717	0	0	" title="Overlapping EnrichrSubstrates" data-content="CSNK1A1 targets 3 genes from the input gene list.The full list of substrates is available below:FOXO1 RELA VHL" style="cursor: pointer; text-decoration: underline dotted;">3 substrates
141	AURORAA	0.09981	0	0	" title="Overlapping EnrichrSubstrates" data-content="AURORAA targets 3 genes from the input gene list.The full list of substrates is available below:GSK3B NCOR1 HDAC3" style="cursor: pointer; text-decoration: underline dotted;">3 substrates
142	PKC	0.1	0	0	" title="Overlapping EnrichrSubstrates" data-content="PKC targets 1 genes from the input gene list.The full list of substrates is available below:ATF2" style="cursor: pointer; text-decoration: underline dotted;">1 substrates
143	RSK	0.1	0	0	" title="Overlapping EnrichrSubstrates" data-content="RSK targets 1 genes from the input gene list.The full list of substrates is available below:CEBPB" style="cursor: pointer; text-decoration: underline dotted;">1 substrates
144	AURKA	0.1025	0	0	" title="Overlapping EnrichrSubstrates" data-content="AURKA targets 3 genes from the input gene list.The full list of substrates is available below:GSK3B VHL PIN1" style="cursor: pointer; text-decoration: underline dotted;">3 substrates
145	MAPK12	0.1079	0	0	" title="Overlapping EnrichrSubstrates" data-content="MAPK12 targets 3 genes from the input gene list.The full list of substrates is available below:ATF2 FOS JUN" style="cursor: pointer; text-decoration: underline dotted;">3 substrates
146	MAP2K2	0.1084	0	0	" title="Overlapping EnrichrSubstrates" data-content="MAP2K2 targets 2 genes from the input gene list.The full list of substrates is available below:MAPK1 MAPK3" style="cursor: pointer; text-decoration: underline dotted;">2 substrates
147	ABL2	0.1084	0	0	" title="Overlapping EnrichrSubstrates" data-content="ABL2 targets 2 genes from the input gene list.The full list of substrates is available below:CEBPB EGFR" style="cursor: pointer; text-decoration: underline dotted;">2 substrates
148	RIPK1	0.1126	0	0	" title="Overlapping EnrichrSubstrates" data-content="RIPK1 targets 2 genes from the input gene list.The full list of substrates is available below:TUBB PML" style="cursor: pointer; text-decoration: underline dotted;">2 substrates
149	FYN	0.1173	0	0	" title="Overlapping EnrichrSubstrates" data-content="FYN targets 5 genes from the input gene list.The full list of substrates is available below:SPI1 PRKCD EGR1 FOS SIRT2" style="cursor: pointer; text-decoration: underline dotted;">5 substrates
150	TRRAP	0.1234	0	0	" title="Overlapping EnrichrSubstrates" data-content="TRRAP targets 1 genes from the input gene list.The full list of substrates is available below:NCOR2" style="cursor: pointer; text-decoration: underline dotted;">1 substrates
151	RSK	0.1234	0	0	" title="Overlapping EnrichrSubstrates" data-content="RSK targets 1 genes from the input gene list.The full list of substrates is available below:FOS" style="cursor: pointer; text-decoration: underline dotted;">1 substrates
152	CK1GAMMA1	0.1234	0	0	" title="Overlapping EnrichrSubstrates" data-content="CK1GAMMA1 targets 1 genes from the input gene list.The full list of substrates is available below:FOXO1" style="cursor: pointer; text-decoration: underline dotted;">1 substrates
153	PKC	0.1349	0	0	" title="Overlapping EnrichrSubstrates" data-content="PKC targets 1 genes from the input gene list.The full list of substrates is available below:RELA" style="cursor: pointer; text-decoration: underline dotted;">1 substrates
154	CK1	0.1349	0	0	" title="Overlapping EnrichrSubstrates" data-content="CK1 targets 1 genes from the input gene list.The full list of substrates is available below:FOXO1" style="cursor: pointer; text-decoration: underline dotted;">1 substrates
155	MAP3K1	0.1402	0	0	" title="Overlapping EnrichrSubstrates" data-content="MAP3K1 targets 4 genes from the input gene list.The full list of substrates is available below:RUVBL2 TUBB DDB1 STAT3" style="cursor: pointer; text-decoration: underline dotted;">4 substrates
156	BRD4	0.1462	0	0	" title="Overlapping EnrichrSubstrates" data-content="BRD4 targets 1 genes from the input gene list.The full list of substrates is available below:POLR2A" style="cursor: pointer; text-decoration: underline dotted;">1 substrates
157	JNK3	0.1462	0	0	" title="Overlapping EnrichrSubstrates" data-content="JNK3 targets 1 genes from the input gene list.The full list of substrates is available below:JUN" style="cursor: pointer; text-decoration: underline dotted;">1 substrates
158	AURKB	0.1522	0	0	" title="Overlapping EnrichrSubstrates" data-content="AURKB targets 4 genes from the input gene list.The full list of substrates is available below:RB1 PRKDC PIN1 NELFE" style="cursor: pointer; text-decoration: underline dotted;">4 substrates
159	MAP2K4	0.1524	0	0	" title="Overlapping EnrichrSubstrates" data-content="MAP2K4 targets 2 genes from the input gene list.The full list of substrates is available below:DAXX RXRA" style="cursor: pointer; text-decoration: underline dotted;">2 substrates
160	TRKB	0.1574	0	0	" title="Overlapping EnrichrSubstrates" data-content="TRKB targets 1 genes from the input gene list.The full list of substrates is available below:FOS" style="cursor: pointer; text-decoration: underline dotted;">1 substrates
161	BRD2	0.1574	0	0	" title="Overlapping EnrichrSubstrates" data-content="BRD2 targets 1 genes from the input gene list.The full list of substrates is available below:RB1" style="cursor: pointer; text-decoration: underline dotted;">1 substrates
162	IGF1R	0.1662	0	0	" title="Overlapping EnrichrSubstrates" data-content="IGF1R targets 2 genes from the input gene list.The full list of substrates is available below:FOS EGFR" style="cursor: pointer; text-decoration: underline dotted;">2 substrates
163	CAMKIIBETA	0.1662	0	0	" title="Overlapping EnrichrSubstrates" data-content="CAMKIIBETA targets 2 genes from the input gene list.The full list of substrates is available below:FOS PPARGC1A" style="cursor: pointer; text-decoration: underline dotted;">2 substrates
164	ERBB2	0.1838	0	0	" title="Overlapping EnrichrSubstrates" data-content="ERBB2 targets 3 genes from the input gene list.The full list of substrates is available below:NCOR1 EGFR STAT3" style="cursor: pointer; text-decoration: underline dotted;">3 substrates
165	RIPK3	0.1871	0	0	" title="Overlapping EnrichrSubstrates" data-content="RIPK3 targets 3 genes from the input gene list.The full list of substrates is available below:RUVBL2 DAXX TUBB" style="cursor: pointer; text-decoration: underline dotted;">3 substrates
166	SRM	0.1901	0	0	" title="Overlapping EnrichrSubstrates" data-content="SRM targets 1 genes from the input gene list.The full list of substrates is available below:RUVBL2" style="cursor: pointer; text-decoration: underline dotted;">1 substrates
167	PKC	0.1901	0	0	" title="Overlapping EnrichrSubstrates" data-content="PKC targets 1 genes from the input gene list.The full list of substrates is available below:STAT3" style="cursor: pointer; text-decoration: underline dotted;">1 substrates
168	PKAALPHA	0.1938	0	0	" title="Overlapping EnrichrSubstrates" data-content="PKAALPHA targets 3 genes from the input gene list.The full list of substrates is available below:NFKB1 FOS RELA" style="cursor: pointer; text-decoration: underline dotted;">3 substrates
169	TGFBR1	0.1944	0	0	" title="Overlapping EnrichrSubstrates" data-content="TGFBR1 targets 2 genes from the input gene list.The full list of substrates is available below:TP63 SMAD2" style="cursor: pointer; text-decoration: underline dotted;">2 substrates
170	MAP3K8	0.2184	0	0	" title="Overlapping EnrichrSubstrates" data-content="MAP3K8 targets 2 genes from the input gene list.The full list of substrates is available below:MAPK1 MAPK3" style="cursor: pointer; text-decoration: underline dotted;">2 substrates
171	SGK1	0.2184	0	0	" title="Overlapping EnrichrSubstrates" data-content="SGK1 targets 2 genes from the input gene list.The full list of substrates is available below:FOXO1 MAPK1" style="cursor: pointer; text-decoration: underline dotted;">2 substrates
172	TAOK1	0.2215	0	0	" title="Overlapping EnrichrSubstrates" data-content="TAOK1 targets 1 genes from the input gene list.The full list of substrates is available below:GSK3B" style="cursor: pointer; text-decoration: underline dotted;">1 substrates
173	PSKH1	0.2215	0	0	" title="Overlapping EnrichrSubstrates" data-content="PSKH1 targets 1 genes from the input gene list.The full list of substrates is available below:TERT" style="cursor: pointer; text-decoration: underline dotted;">1 substrates
174	CDKL4	0.2215	0	0	" title="Overlapping EnrichrSubstrates" data-content="CDKL4 targets 1 genes from the input gene list.The full list of substrates is available below:CHFR" style="cursor: pointer; text-decoration: underline dotted;">1 substrates
175	BMP2K	0.2215	0	0	" title="Overlapping EnrichrSubstrates" data-content="BMP2K targets 1 genes from the input gene list.The full list of substrates is available below:RUNX1" style="cursor: pointer; text-decoration: underline dotted;">1 substrates
176	ALPK1	0.2215	0	0	" title="Overlapping EnrichrSubstrates" data-content="ALPK1 targets 1 genes from the input gene list.The full list of substrates is available below:IKBKE" style="cursor: pointer; text-decoration: underline dotted;">1 substrates
177	TRIB1	0.2215	0	0	" title="Overlapping EnrichrSubstrates" data-content="TRIB1 targets 1 genes from the input gene list.The full list of substrates is available below:ATF3" style="cursor: pointer; text-decoration: underline dotted;">1 substrates
178	SRPK3	0.2215	0	0	" title="Overlapping EnrichrSubstrates" data-content="SRPK3 targets 1 genes from the input gene list.The full list of substrates is available below:SIRT2" style="cursor: pointer; text-decoration: underline dotted;">1 substrates
179	PTK7	0.2215	0	0	" title="Overlapping EnrichrSubstrates" data-content="PTK7 targets 1 genes from the input gene list.The full list of substrates is available below:DDB1" style="cursor: pointer; text-decoration: underline dotted;">1 substrates
180	PRKG1	0.2232	0	0	" title="Overlapping EnrichrSubstrates" data-content="PRKG1 targets 2 genes from the input gene list.The full list of substrates is available below:SRF EGR1" style="cursor: pointer; text-decoration: underline dotted;">2 substrates
181	BTK	0.228	0	0	" title="Overlapping EnrichrSubstrates" data-content="BTK targets 2 genes from the input gene list.The full list of substrates is available below:FOS JUN" style="cursor: pointer; text-decoration: underline dotted;">2 substrates
182	PDK	0.2317	0	0	" title="Overlapping EnrichrSubstrates" data-content="PDK targets 1 genes from the input gene list.The full list of substrates is available below:PRKCD" style="cursor: pointer; text-decoration: underline dotted;">1 substrates
183	CDK12	0.2317	0	0	" title="Overlapping EnrichrSubstrates" data-content="CDK12 targets 1 genes from the input gene list.The full list of substrates is available below:POLR2A" style="cursor: pointer; text-decoration: underline dotted;">1 substrates
184	CDK13	0.2317	0	0	" title="Overlapping EnrichrSubstrates" data-content="CDK13 targets 1 genes from the input gene list.The full list of substrates is available below:POLR2A" style="cursor: pointer; text-decoration: underline dotted;">1 substrates
185	PKCETA	0.2317	0	0	" title="Overlapping EnrichrSubstrates" data-content="PKCETA targets 1 genes from the input gene list.The full list of substrates is available below:PRKCD" style="cursor: pointer; text-decoration: underline dotted;">1 substrates
186	MINK1	0.2317	0	0	" title="Overlapping EnrichrSubstrates" data-content="MINK1 targets 1 genes from the input gene list.The full list of substrates is available below:SMAD2" style="cursor: pointer; text-decoration: underline dotted;">1 substrates
187	MAP4K5	0.2317	0	0	" title="Overlapping EnrichrSubstrates" data-content="MAP4K5 targets 1 genes from the input gene list.The full list of substrates is available below:GSK3B" style="cursor: pointer; text-decoration: underline dotted;">1 substrates
188	MAP3K3	0.2372	0	0	" title="Overlapping EnrichrSubstrates" data-content="MAP3K3 targets 4 genes from the input gene list.The full list of substrates is available below:RUVBL2 TUBB DDB1 STUB1" style="cursor: pointer; text-decoration: underline dotted;">4 substrates
189	CDK20	0.2418	0	0	" title="Overlapping EnrichrSubstrates" data-content="CDK20 targets 1 genes from the input gene list.The full list of substrates is available below:CDK2" style="cursor: pointer; text-decoration: underline dotted;">1 substrates
190	CDK18	0.2418	0	0	" title="Overlapping EnrichrSubstrates" data-content="CDK18 targets 1 genes from the input gene list.The full list of substrates is available below:SIRT2" style="cursor: pointer; text-decoration: underline dotted;">1 substrates
191	PKMYT1	0.2418	0	0	" title="Overlapping EnrichrSubstrates" data-content="PKMYT1 targets 1 genes from the input gene list.The full list of substrates is available below:SMARCA4" style="cursor: pointer; text-decoration: underline dotted;">1 substrates
192	NTRK3	0.2418	0	0	" title="Overlapping EnrichrSubstrates" data-content="NTRK3 targets 1 genes from the input gene list.The full list of substrates is available below:FOS" style="cursor: pointer; text-decoration: underline dotted;">1 substrates
193	MARK4	0.2418	0	0	" title="Overlapping EnrichrSubstrates" data-content="MARK4 targets 1 genes from the input gene list.The full list of substrates is available below:SMARCA4" style="cursor: pointer; text-decoration: underline dotted;">1 substrates
194	PIM3	0.2518	0	0	" title="Overlapping EnrichrSubstrates" data-content="PIM3 targets 1 genes from the input gene list.The full list of substrates is available below:PML" style="cursor: pointer; text-decoration: underline dotted;">1 substrates
195	FLT3	0.2518	0	0	" title="Overlapping EnrichrSubstrates" data-content="FLT3 targets 1 genes from the input gene list.The full list of substrates is available below:RUNX1" style="cursor: pointer; text-decoration: underline dotted;">1 substrates
196	CAM	0.2518	0	0	" title="Overlapping EnrichrSubstrates" data-content="CAM targets 1 genes from the input gene list.The full list of substrates is available below:EGFR" style="cursor: pointer; text-decoration: underline dotted;">1 substrates
197	SGK2	0.2518	0	0	" title="Overlapping EnrichrSubstrates" data-content="SGK2 targets 1 genes from the input gene list.The full list of substrates is available below:GSK3B" style="cursor: pointer; text-decoration: underline dotted;">1 substrates
198	MAPK15	0.2518	0	0	" title="Overlapping EnrichrSubstrates" data-content="MAPK15 targets 1 genes from the input gene list.The full list of substrates is available below:JUN" style="cursor: pointer; text-decoration: underline dotted;">1 substrates
199	MAP3K10	0.2616	0	0	" title="Overlapping EnrichrSubstrates" data-content="MAP3K10 targets 1 genes from the input gene list.The full list of substrates is available below:TCF3" style="cursor: pointer; text-decoration: underline dotted;">1 substrates
200	SIK1	0.2616	0	0	" title="Overlapping EnrichrSubstrates" data-content="SIK1 targets 1 genes from the input gene list.The full list of substrates is available below:NCOR2" style="cursor: pointer; text-decoration: underline dotted;">1 substrates
201	MAP4K4	0.2616	0	0	" title="Overlapping EnrichrSubstrates" data-content="MAP4K4 targets 1 genes from the input gene list.The full list of substrates is available below:SMARCA4" style="cursor: pointer; text-decoration: underline dotted;">1 substrates
202	MAPK6	0.2616	0	0	" title="Overlapping EnrichrSubstrates" data-content="MAPK6 targets 1 genes from the input gene list.The full list of substrates is available below:DDB1" style="cursor: pointer; text-decoration: underline dotted;">1 substrates
203	WEE1	0.2616	0	0	" title="Overlapping EnrichrSubstrates" data-content="WEE1 targets 1 genes from the input gene list.The full list of substrates is available below:CDK2" style="cursor: pointer; text-decoration: underline dotted;">1 substrates
204	CDK16	0.2713	0	0	" title="Overlapping EnrichrSubstrates" data-content="CDK16 targets 1 genes from the input gene list.The full list of substrates is available below:SMARCA4" style="cursor: pointer; text-decoration: underline dotted;">1 substrates
205	FRK	0.2713	0	0	" title="Overlapping EnrichrSubstrates" data-content="FRK targets 1 genes from the input gene list.The full list of substrates is available below:FOS" style="cursor: pointer; text-decoration: underline dotted;">1 substrates
206	CSNK1G2	0.2713	0	0	" title="Overlapping EnrichrSubstrates" data-content="CSNK1G2 targets 1 genes from the input gene list.The full list of substrates is available below:EHMT2" style="cursor: pointer; text-decoration: underline dotted;">1 substrates
207	CSNK1G1	0.2713	0	0	" title="Overlapping EnrichrSubstrates" data-content="CSNK1G1 targets 1 genes from the input gene list.The full list of substrates is available below:RELA" style="cursor: pointer; text-decoration: underline dotted;">1 substrates
208	MAP3K11	0.2713	0	0	" title="Overlapping EnrichrSubstrates" data-content="MAP3K11 targets 1 genes from the input gene list.The full list of substrates is available below:PIN1" style="cursor: pointer; text-decoration: underline dotted;">1 substrates
209	MERTK	0.2713	0	0	" title="Overlapping EnrichrSubstrates" data-content="MERTK targets 1 genes from the input gene list.The full list of substrates is available below:STAT3" style="cursor: pointer; text-decoration: underline dotted;">1 substrates
210	DYRK3	0.2713	0	0	" title="Overlapping EnrichrSubstrates" data-content="DYRK3 targets 1 genes from the input gene list.The full list of substrates is available below:SIRT1" style="cursor: pointer; text-decoration: underline dotted;">1 substrates
211	MYLK2	0.2808	0	0	" title="Overlapping EnrichrSubstrates" data-content="MYLK2 targets 1 genes from the input gene list.The full list of substrates is available below:NFKB2" style="cursor: pointer; text-decoration: underline dotted;">1 substrates
212	RPS6KA4	0.2808	0	0	" title="Overlapping EnrichrSubstrates" data-content="RPS6KA4 targets 1 genes from the input gene list.The full list of substrates is available below:RELA" style="cursor: pointer; text-decoration: underline dotted;">1 substrates
213	YES	0.2808	0	0	" title="Overlapping EnrichrSubstrates" data-content="YES targets 1 genes from the input gene list.The full list of substrates is available below:EGFR" style="cursor: pointer; text-decoration: underline dotted;">1 substrates
214	PAK5	0.2808	0	0	" title="Overlapping EnrichrSubstrates" data-content="PAK5 targets 1 genes from the input gene list.The full list of substrates is available below:TCF3" style="cursor: pointer; text-decoration: underline dotted;">1 substrates
215	MYLK	0.2903	0	0	" title="Overlapping EnrichrSubstrates" data-content="MYLK targets 1 genes from the input gene list.The full list of substrates is available below:MAPK3" style="cursor: pointer; text-decoration: underline dotted;">1 substrates
216	NEK1	0.2903	0	0	" title="Overlapping EnrichrSubstrates" data-content="NEK1 targets 1 genes from the input gene list.The full list of substrates is available below:VHL" style="cursor: pointer; text-decoration: underline dotted;">1 substrates
217	PIM2	0.2903	0	0	" title="Overlapping EnrichrSubstrates" data-content="PIM2 targets 1 genes from the input gene list.The full list of substrates is available below:MYC" style="cursor: pointer; text-decoration: underline dotted;">1 substrates
218	EPHB3	0.2903	0	0	" title="Overlapping EnrichrSubstrates" data-content="EPHB3 targets 1 genes from the input gene list.The full list of substrates is available below:SMARCA4" style="cursor: pointer; text-decoration: underline dotted;">1 substrates
219	EPHA8	0.2903	0	0	" title="Overlapping EnrichrSubstrates" data-content="EPHA8 targets 1 genes from the input gene list.The full list of substrates is available below:SMARCA4" style="cursor: pointer; text-decoration: underline dotted;">1 substrates
220	ICK	0.2903	0	0	" title="Overlapping EnrichrSubstrates" data-content="ICK targets 1 genes from the input gene list.The full list of substrates is available below:SIRT2" style="cursor: pointer; text-decoration: underline dotted;">1 substrates
221	MARK3	0.2903	0	0	" title="Overlapping EnrichrSubstrates" data-content="MARK3 targets 1 genes from the input gene list.The full list of substrates is available below:DDB1" style="cursor: pointer; text-decoration: underline dotted;">1 substrates
222	PKC	0.2912	0	0	" title="Overlapping EnrichrSubstrates" data-content="PKC targets 2 genes from the input gene list.The full list of substrates is available below:SRF EGFR" style="cursor: pointer; text-decoration: underline dotted;">2 substrates
223	CAMKIIGAMMA	0.3088	0	0	" title="Overlapping EnrichrSubstrates" data-content="CAMKIIGAMMA targets 1 genes from the input gene list.The full list of substrates is available below:EGFR" style="cursor: pointer; text-decoration: underline dotted;">1 substrates
224	PRKG2	0.3088	0	0	" title="Overlapping EnrichrSubstrates" data-content="PRKG2 targets 1 genes from the input gene list.The full list of substrates is available below:RUNX1" style="cursor: pointer; text-decoration: underline dotted;">1 substrates
225	CK1EPSILON	0.3088	0	0	" title="Overlapping EnrichrSubstrates" data-content="CK1EPSILON targets 1 genes from the input gene list.The full list of substrates is available below:FOXO1" style="cursor: pointer; text-decoration: underline dotted;">1 substrates
226	RPS6KB2	0.3088	0	0	" title="Overlapping EnrichrSubstrates" data-content="RPS6KB2 targets 1 genes from the input gene list.The full list of substrates is available below:GSK3B" style="cursor: pointer; text-decoration: underline dotted;">1 substrates
227	SGK3	0.3178	0	0	" title="Overlapping EnrichrSubstrates" data-content="SGK3 targets 1 genes from the input gene list.The full list of substrates is available below:GSK3B" style="cursor: pointer; text-decoration: underline dotted;">1 substrates
228	IRAK1	0.3178	0	0	" title="Overlapping EnrichrSubstrates" data-content="IRAK1 targets 1 genes from the input gene list.The full list of substrates is available below:STAT3" style="cursor: pointer; text-decoration: underline dotted;">1 substrates
229	JAK3	0.3268	0	0	" title="Overlapping EnrichrSubstrates" data-content="JAK3 targets 1 genes from the input gene list.The full list of substrates is available below:EZH2" style="cursor: pointer; text-decoration: underline dotted;">1 substrates
230	LKB1	0.3268	0	0	" title="Overlapping EnrichrSubstrates" data-content="LKB1 targets 1 genes from the input gene list.The full list of substrates is available below:PPARGC1A" style="cursor: pointer; text-decoration: underline dotted;">1 substrates
231	PTK6	0.3268	0	0	" title="Overlapping EnrichrSubstrates" data-content="PTK6 targets 1 genes from the input gene list.The full list of substrates is available below:EGFR" style="cursor: pointer; text-decoration: underline dotted;">1 substrates
232	CAMK4	0.3268	0	0	" title="Overlapping EnrichrSubstrates" data-content="CAMK4 targets 1 genes from the input gene list.The full list of substrates is available below:RELA" style="cursor: pointer; text-decoration: underline dotted;">1 substrates
233	GRK2	0.3268	0	0	" title="Overlapping EnrichrSubstrates" data-content="GRK2 targets 1 genes from the input gene list.The full list of substrates is available below:SMAD2" style="cursor: pointer; text-decoration: underline dotted;">1 substrates
234	PRKACB	0.3356	0	0	" title="Overlapping EnrichrSubstrates" data-content="PRKACB targets 1 genes from the input gene list.The full list of substrates is available below:FOS" style="cursor: pointer; text-decoration: underline dotted;">1 substrates
235	PRKCH	0.3356	0	0	" title="Overlapping EnrichrSubstrates" data-content="PRKCH targets 1 genes from the input gene list.The full list of substrates is available below:GSK3B" style="cursor: pointer; text-decoration: underline dotted;">1 substrates
236	TEC	0.3356	0	0	" title="Overlapping EnrichrSubstrates" data-content="TEC targets 1 genes from the input gene list.The full list of substrates is available below:RUNX1" style="cursor: pointer; text-decoration: underline dotted;">1 substrates
237	PKN1	0.3444	0	0	" title="Overlapping EnrichrSubstrates" data-content="PKN1 targets 1 genes from the input gene list.The full list of substrates is available below:EGFR" style="cursor: pointer; text-decoration: underline dotted;">1 substrates
238	NEK6	0.3444	0	0	" title="Overlapping EnrichrSubstrates" data-content="NEK6 targets 1 genes from the input gene list.The full list of substrates is available below:STAT3" style="cursor: pointer; text-decoration: underline dotted;">1 substrates
239	AXL	0.3444	0	0	" title="Overlapping EnrichrSubstrates" data-content="AXL targets 1 genes from the input gene list.The full list of substrates is available below:STAT3" style="cursor: pointer; text-decoration: underline dotted;">1 substrates
240	CAMK1	0.3444	0	0	" title="Overlapping EnrichrSubstrates" data-content="CAMK1 targets 1 genes from the input gene list.The full list of substrates is available below:HDAC7" style="cursor: pointer; text-decoration: underline dotted;">1 substrates
241	FER	0.3444	0	0	" title="Overlapping EnrichrSubstrates" data-content="FER targets 1 genes from the input gene list.The full list of substrates is available below:STAT3" style="cursor: pointer; text-decoration: underline dotted;">1 substrates
242	YES1	0.353	0	0	" title="Overlapping EnrichrSubstrates" data-content="YES1 targets 1 genes from the input gene list.The full list of substrates is available below:PRKCD" style="cursor: pointer; text-decoration: underline dotted;">1 substrates
243	EPHB1	0.3615	0	0	" title="Overlapping EnrichrSubstrates" data-content="EPHB1 targets 1 genes from the input gene list.The full list of substrates is available below:STAT3" style="cursor: pointer; text-decoration: underline dotted;">1 substrates
244	STK4	0.3615	0	0	" title="Overlapping EnrichrSubstrates" data-content="STK4 targets 1 genes from the input gene list.The full list of substrates is available below:H2AFX" style="cursor: pointer; text-decoration: underline dotted;">1 substrates
245	BMPR1B	0.3615	0	0	" title="Overlapping EnrichrSubstrates" data-content="BMPR1B targets 1 genes from the input gene list.The full list of substrates is available below:SMAD2" style="cursor: pointer; text-decoration: underline dotted;">1 substrates
246	PDGFRB	0.3698	0	0	" title="Overlapping EnrichrSubstrates" data-content="PDGFRB targets 1 genes from the input gene list.The full list of substrates is available below:PRKCD" style="cursor: pointer; text-decoration: underline dotted;">1 substrates
247	PKG1CGKI	0.3863	0	0	" title="Overlapping EnrichrSubstrates" data-content="PKG1CGKI targets 1 genes from the input gene list.The full list of substrates is available below:SP1" style="cursor: pointer; text-decoration: underline dotted;">1 substrates
248	TTK	0.4006	0	0	" title="Overlapping EnrichrSubstrates" data-content="TTK targets 2 genes from the input gene list.The full list of substrates is available below:CDK2 E2F4" style="cursor: pointer; text-decoration: underline dotted;">2 substrates
249	ARAF	0.4023	0	0	" title="Overlapping EnrichrSubstrates" data-content="ARAF targets 1 genes from the input gene list.The full list of substrates is available below:PRKCD" style="cursor: pointer; text-decoration: underline dotted;">1 substrates
250	BLK	0.4102	0	0	" title="Overlapping EnrichrSubstrates" data-content="BLK targets 1 genes from the input gene list.The full list of substrates is available below:EGFR" style="cursor: pointer; text-decoration: underline dotted;">1 substrates
251	STK11	0.4179	0	0	" title="Overlapping EnrichrSubstrates" data-content="STK11 targets 1 genes from the input gene list.The full list of substrates is available below:SMAD4" style="cursor: pointer; text-decoration: underline dotted;">1 substrates
252	HCK	0.4179	0	0	" title="Overlapping EnrichrSubstrates" data-content="HCK targets 1 genes from the input gene list.The full list of substrates is available below:SPI1" style="cursor: pointer; text-decoration: underline dotted;">1 substrates
253	KIT	0.4179	0	0	" title="Overlapping EnrichrSubstrates" data-content="KIT targets 1 genes from the input gene list.The full list of substrates is available below:STAT3" style="cursor: pointer; text-decoration: underline dotted;">1 substrates
254	MET	0.4406	0	0	" title="Overlapping EnrichrSubstrates" data-content="MET targets 1 genes from the input gene list.The full list of substrates is available below:PARP1" style="cursor: pointer; text-decoration: underline dotted;">1 substrates
255	RIPK2	0.4479	0	0	" title="Overlapping EnrichrSubstrates" data-content="RIPK2 targets 1 genes from the input gene list.The full list of substrates is available below:TUBB" style="cursor: pointer; text-decoration: underline dotted;">1 substrates
256	PRKD2	0.4552	0	0	" title="Overlapping EnrichrSubstrates" data-content="PRKD2 targets 1 genes from the input gene list.The full list of substrates is available below:RXRA" style="cursor: pointer; text-decoration: underline dotted;">1 substrates
257	CSNK1D	0.4552	0	0	" title="Overlapping EnrichrSubstrates" data-content="CSNK1D targets 1 genes from the input gene list.The full list of substrates is available below:HIF1A" style="cursor: pointer; text-decoration: underline dotted;">1 substrates
258	PTK2	0.4624	0	0	" title="Overlapping EnrichrSubstrates" data-content="PTK2 targets 1 genes from the input gene list.The full list of substrates is available below:SUMO1" style="cursor: pointer; text-decoration: underline dotted;">1 substrates
259	PRKCG	0.4694	0	0	" title="Overlapping EnrichrSubstrates" data-content="PRKCG targets 1 genes from the input gene list.The full list of substrates is available below:GSK3B" style="cursor: pointer; text-decoration: underline dotted;">1 substrates
260	PLK1	0.5069	0	0	" title="Overlapping EnrichrSubstrates" data-content="PLK1 targets 4 genes from the input gene list.The full list of substrates is available below:MYC SUZ12 CCNT1 PIN1" style="cursor: pointer; text-decoration: underline dotted;">4 substrates
261	CK1DELTA	0.5164	0	0	" title="Overlapping EnrichrSubstrates" data-content="CK1DELTA targets 1 genes from the input gene list.The full list of substrates is available below:FOXO1" style="cursor: pointer; text-decoration: underline dotted;">1 substrates
262	ABL	0.5353	0	0	" title="Overlapping EnrichrSubstrates" data-content="ABL targets 1 genes from the input gene list.The full list of substrates is available below:CDK2" style="cursor: pointer; text-decoration: underline dotted;">1 substrates
263	ERBB3	0.5414	0	0	" title="Overlapping EnrichrSubstrates" data-content="ERBB3 targets 1 genes from the input gene list.The full list of substrates is available below:EGFR" style="cursor: pointer; text-decoration: underline dotted;">1 substrates
264	MAPKAPK2	0.593	0	0	" title="Overlapping EnrichrSubstrates" data-content="MAPKAPK2 targets 1 genes from the input gene list.The full list of substrates is available below:SRF" style="cursor: pointer; text-decoration: underline dotted;">1 substrates
265	TRIM24	0.6037	0	0	" title="Overlapping EnrichrSubstrates" data-content="TRIM24 targets 1 genes from the input gene list.The full list of substrates is available below:TAF9" style="cursor: pointer; text-decoration: underline dotted;">1 substrates
266	ROCK1	0.6192	0	0	" title="Overlapping EnrichrSubstrates" data-content="ROCK1 targets 1 genes from the input gene list.The full list of substrates is available below:SRF" style="cursor: pointer; text-decoration: underline dotted;">1 substrates
267	PKCGAMMA	0.6242	0	0	" title="Overlapping EnrichrSubstrates" data-content="PKCGAMMA targets 1 genes from the input gene list.The full list of substrates is available below:PRKCD" style="cursor: pointer; text-decoration: underline dotted;">1 substrates
268	AURORAB	0.6437	0	0	" title="Overlapping EnrichrSubstrates" data-content="AURORAB targets 1 genes from the input gene list.The full list of substrates is available below:RB1" style="cursor: pointer; text-decoration: underline dotted;">1 substrates
