# Supplementary material for: Signatures of Co-Deregulated Genes and Their Transcriptional Regulators in Lung Cancer
Source: Int J Mol Sci. 2022 Sep 18;23(18):10933. doi: 10.3390/ijms231810933 (PMC9504879; doi:10.3390/ijms231810933)
Supplement: Supplementary file 1 [file ijms-23-10933-s001.zip › Table S12.xlsx]

## Sheet: Table S12
Table S12: Gene Ontology (GO) annotations significantly linked with the co-DEGs in LC after single-drug perturbation. The terms are sorted according to the combined score.
Co-upregulated genes (Biological Process)
Term	Overlap	P-value	Adjusted P-value	Old P-value	Old Adjusted P-value	Odds Ratio	Combined Score	Genes
SRP-dependent cotranslational protein targeting to membrane (GO:0006614)	45/90	1.31353e-49	3.83683e-46	0	0	46.5179	5235.77	RPL4;RPL5;RPL3;RPL32;RPL12;RPLP0;RPL11;RPL36A;RPL8;SRP14;RPS4Y1;RPL9;RPS15;RPS17;RPS16;RPS15A;RPS19;RPS18;RPS3;RPL35;RPLP2;RPL38;RPL39;RPS10;RPL17;RPS13;RPS12;RPL19;RPL21;RPS8;RPL23;RPL22;RPS6;RPL13A;RPS3A;RPL23A;RPS26;RPS25;RPS27;RPL37A;RPL24;RPL27;RPL28;UBA52;RPS21
cotranslational protein targeting to membrane (GO:0006613)	45/94	1.74015e-48	2.54149e-45	0	0	42.7118	4697.02	RPL4;RPL5;RPL3;RPL32;RPL12;RPLP0;RPL11;RPL36A;RPL8;SRP14;RPS4Y1;RPL9;RPS15;RPS17;RPS16;RPS15A;RPS19;RPS18;RPS3;RPL35;RPLP2;RPL38;RPL39;RPS10;RPL17;RPS13;RPS12;RPL19;RPL21;RPS8;RPL23;RPL22;RPS6;RPL13A;RPS3A;RPL23A;RPS26;RPS25;RPS27;RPL37A;RPL24;RPL27;RPL28;UBA52;RPS21
protein targeting to ER (GO:0045047)	46/103	9.21548e-48	8.9728e-45	0	0	37.6074	4073	RPL4;RPL5;RPL3;RPL32;RPL12;RPLP0;RPL11;RPL36A;RPL8;SRP14;RPS4Y1;RPL9;RPS15;RPS17;RPS16;RPS15A;RPS19;RPS18;SEC61G;RPS3;RPL35;RPLP2;RPL38;RPL39;RPS10;RPL17;RPS13;RPS12;RPL19;RPL21;RPS8;RPL23;RPL22;RPS6;RPL13A;RPS3A;RPL23A;RPS26;RPS25;RPS27;RPL37A;RPL24;RPL27;RPL28;UBA52;RPS21
cytoplasmic translation (GO:0002181)	43/93	1.61215e-45	1.17727e-42	0	0	39.8051	4105.45	RPL4;RPL5;RPL3;RPL32;RPL12;RPLP0;RPL11;RPL36A;RPL8;RPL9;RPS15;RPS17;RPS16;RPS15A;RPS19;RPS18;RPS3;RPL35;RPL38;RPL39;RPS10;RPL17;RPS13;RPS12;RPL19;RPL21;RPS8;RPL23;RPL22;RPS6;RPL13A;RPS3A;RPL23A;RPS26;RPS25;RPS27;EIF3I;RPL37A;RPL24;RPL27;RPL28;UBA52;RPS21
nuclear-transcribed mRNA catabolic process, nonsense-mediated decay (GO:0000184)	45/113	5.90468e-44	3.44952e-41	0	0	30.7476	3060.55	RPL4;RPL5;RPL3;RPL32;RPL12;RPLP0;RPL11;RPL36A;RPL8;RPS4Y1;RPL9;RPS15;RPS17;RPS16;RPS15A;RPS19;RPS18;RPS3;RPL35;RPLP2;RPL38;RPL39;RPS10;RPL17;RPS13;RPS12;RPL19;RPL21;RPS8;RPL23;RPL22;RPS6;RPL13A;RPS3A;RPL23A;RPS26;RPS25;RPS27;RPL37A;RPL24;RPL27;PABPC1;RPL28;UBA52;RPS21
nuclear-transcribed mRNA catabolic process (GO:0000956)	47/171	3.46419e-37	1.68649e-34	0	0	17.6445	1481.32	RPL4;RPL5;RPL3;RPL32;RPL12;RPLP0;RPL11;RPL36A;RPL8;RPS4Y1;RPL9;RPS15;RPS17;ZFP36;RPS16;RPS15A;RPS19;RPS18;RPS3;RPL35;RPLP2;RPL38;POLR2G;RPL39;RPS10;RPL17;RPS13;RPS12;RPL19;RPL21;RPS8;RPL23;RPL22;RPS6;RPL13A;RPS3A;RPL23A;RPS26;RPS25;RPS27;RPL37A;RPL24;RPL27;PABPC1;RPL28;UBA52;RPS21
translation (GO:0006412)	50/214	9.44385e-36	3.94079e-33	0	0	14.2659	1150.51	RPL4;RPL5;RPL3;RPL32;RPLP0;RPL8;RPL9;RPS15;EEF1B2;RPS17;RPS16;RPS19;RPS18;RPL35;RPLP2;RPL38;RPL39;RPS10;RPS13;RPS12;RPL21;MRPS24;RPS8;RPL23;RPL22;RPS6;RPL13A;RPS3A;EEF1G;MRPL51;EEF1D;RPL37A;RPL24;RPL27;RPL28;UBA52;RPL12;RPL11;RPL36A;RPS4Y1;RPS15A;RPS3;RPL17;RPL19;RPL23A;EEF2;RPS26;RPS25;RPS27;RPS21
peptide biosynthetic process (GO:0043043)	44/162	1.29661e-34	4.73424e-32	0	0	17.2395	1345.17	RPL4;RPL5;RPL3;RPL32;RPL12;RPLP0;RPL11;RPL36A;RPL8;RPS4Y1;RPL9;RPS15;RPS17;RPS16;RPS15A;RPS19;RPS18;RPS3;RPL35;RPLP2;RPL38;RPL39;RPS10;RPL17;RPS13;RPS12;RPL19;RPL21;RPS8;RPL23;RPL22;RPS6;RPL13A;RPS3A;RPL23A;RPS26;RPS25;RPS27;MRPL51;RPL37A;RPL24;RPL27;RPL28;RPS21
cellular protein metabolic process (GO:0044267)	62/417	4.06022e-32	1.31777e-29	0	0	8.33314	602.332	RPL4;RPL5;RPL3;RPL32;RPLP0;RPL8;RPL9;PRSS23;RPS15;RPS17;LGALS1;RPS16;CDH2;RPS19;RPS18;FDXR;RPL35;RPLP2;RPL38;RPL39;RPS10;RPS13;RPS12;RPL21;RPS8;RPL23;RPL22;RPS6;RPL13A;RPS3A;PDIA6;RCN1;MRPL51;RPL37A;RPL24;SPARCL1;RPL27;MFGE8;RPL28;UBA52;RPN2;RPL12;RPL11;RPL36A;NEDD8;RPS4Y1;CST3;RPS15A;RPS3;SPP1;LTA4H;APOE;RPL17;SEC11A;RPL19;FN1;RPL23A;RPS26;RPS25;RPS27;RPS21;LGMN
cellular macromolecule biosynthetic process (GO:0034645)	51/314	2.28079e-28	6.66219e-26	0	0	9.04927	575.967	RPL4;RPL5;RPL3;RPL32;RPLP0;RPL8;RPL9;RPS15;EEF1B2;RPS17;RPS16;RPS19;RPS18;RPL35;RPLP2;RPL38;RPL39;RPS10;RPS13;RPS12;RPL21;RPS8;RPL23;RPL22;RPS6;RPL13A;RPS3A;EEF1G;MRPL51;EEF1D;RPL37A;RPL24;RPL27;RPL28;RPL12;RPL11;RPL36A;RPS4Y1;RPS15A;RPS3;POLR2G;APOE;RPL17;RPL19;POLR2L;RPL23A;EEF2;RPS26;RPS25;RPS27;RPS21
Co-upregulated genes (Cellular Component)
Term	Overlap	P-value	Adjusted P-value	Old P-value	Old Adjusted P-value	Odds Ratio	Combined Score	Genes
focal adhesion (GO:0005925)	59/387	3.46943e-31	8.91644e-29	0	0	8.53111	598.339	RPL4;RPL5;RPL3;RPLP0;FHL2;HSPB1;RPL8;RPL9;RND3;ACTB;RPS15;RPS17;ALCAM;RPS16;CSRP1;CDH2;RPS19;YWHAQ;RPS18;PLAU;CFL1;BSG;RPLP2;CHP1;ITGB8;RPL38;CPNE3;B2M;RPS10;RPS13;ANXA1;RPS8;RPL23;RPL22;ANXA5;RPL13A;RPS3A;YWHAZ;PROCR;RPL37A;MYH9;RPL27;PABPC1;PFN1;ATP6V0C;EPHA2;RPL12;CNN2;RPS3;CD99;RPL19;NPM1;HSPA5;HMGA1;MSN;ARPC2;CTNNB1;VIM;HSPA1A
cell-substrate junction (GO:0030055)	59/394	9.44829e-31	1.21411e-28	0	0	8.3498	577.258	RPL4;RPL5;RPL3;RPLP0;FHL2;HSPB1;RPL8;RPL9;RND3;ACTB;RPS15;RPS17;ALCAM;RPS16;CSRP1;CDH2;RPS19;YWHAQ;RPS18;PLAU;CFL1;BSG;RPLP2;CHP1;ITGB8;RPL38;CPNE3;B2M;RPS10;RPS13;ANXA1;RPS8;RPL23;RPL22;ANXA5;RPL13A;RPS3A;YWHAZ;PROCR;RPL37A;MYH9;RPL27;PABPC1;PFN1;ATP6V0C;EPHA2;RPL12;CNN2;RPS3;CD99;RPL19;NPM1;HSPA5;HMGA1;MSN;ARPC2;CTNNB1;VIM;HSPA1A
cytosolic large ribosomal subunit (GO:0022625)	25/55	1.16987e-26	1.00219e-24	0	0	37.0273	2210.91	RPL4;RPL5;RPL3;RPL32;RPL12;RPLP0;RPL11;RPL36A;RPL8;RPL9;RPL35;RPLP2;RPL38;RPL39;RPL17;RPL19;RPL21;RPL23;RPL22;RPL13A;RPL23A;RPL37A;RPL24;RPL27;RPL28
large ribosomal subunit (GO:0015934)	25/59	1.05416e-25	6.77298e-24	0	0	32.6645	1878.6	RPL4;RPL5;RPL3;RPL32;RPL12;RPLP0;RPL11;RPL36A;RPL8;RPL9;RPL35;RPLP2;RPL38;RPL39;RPL17;RPL19;RPL21;RPL23;RPL22;RPL13A;RPL23A;RPL37A;RPL24;RPL27;RPL28
cytosolic small ribosomal subunit (GO:0022627)	20/40	1.2206e-22	6.2739e-21	0	0	43.955	2217.86	RPS8;RPS6;RPS27L;RPS3A;RPS4Y1;RPS15;RPS26;RPS25;RPS17;RPS15A;RPS16;RPS27;RPS19;RPS18;RPS3;RPS10;RPS21;UBA52;RPS13;RPS12
ribosome (GO:0005840)	23/62	3.83769e-22	1.64381e-20	0	0	26.0731	1285.72	RPL32;RPL23;RPL11;RPL36A;RPL13A;RPL8;RPL9;RPS26;RPS25;RPS17;RPS27;RPS19;RPS18;RPS3;RPL24;EIF3H;RPL38;RPL27;RPL39;RPS10;RPS21;RPS13;RPL19
small ribosomal subunit (GO:0015935)	20/45	2.52251e-21	9.26122e-20	0	0	35.155	1667.37	RPS8;RPS6;RPS27L;RPS3A;RPS4Y1;RPS15;RPS26;RPS25;RPS17;RPS15A;RPS16;RPS27;RPS19;RPS18;RPS3;RPS10;RPS21;UBA52;RPS13;RPS12
intracellular membrane-bounded organelle (GO:0043231)	189/5192	1.62017e-12	5.20478e-11	0	0	1.99643	54.2	RPL4;RPL5;SCARB1;RPL3;KDELR1;ENO1;PARK7;SRP14;LIPA;PHB2;RPL9;CLU;ACTB;TM7SF2;PSMD8;RPS15;EEF1B2;LGALS3;ZFP36;MT2A;CHCHD2;SNRPD2;RPS18;MYC;FTH1;CFL1;BSG;CYP1B1;CHP1;CPNE3;BANF1;TXNL4A;HMGN2;IER2;FADS1;RPS13;IER3;RPS12;G6PD;RPS8;RPL22;RPS6;KRT8;KRT7;TALDO1;ACOT13;MITF;ATP11A;PGD;RRAGA;S100A6;RPL27;S100A4;ERH;TRIB3;SNRPF;PFN1;TRIB1;UBA52;SQSTM1;ISCU;ATF4;BEX2;TMED10;TACSTD2;TXN;RPS4Y1;HIF1A;NDRG1;LD…
nucleus (GO:0005634)	166/4484	2.57593e-11	7.35572e-10	0	0	1.96321	47.8674	RPL4;RPL5;RPL3;ENO1;PARK7;SRP14;PHB2;RPL9;CLU;ACTB;PSMD8;RPS15;EEF1B2;LGALS3;ZFP36;MT2A;CHCHD2;SNRPD2;RPS18;MYC;FTH1;CFL1;CHP1;CPNE3;BANF1;TXNL4A;HMGN2;IER2;RPS13;IER3;RPS8;RPL22;RPS6;KRT8;KRT7;TALDO1;ACOT13;MITF;PGD;RRAGA;S100A6;RPL27;S100A4;ERH;TRIB3;SNRPF;PFN1;TRIB1;UBA52;ISCU;ATF4;BEX2;TACSTD2;TXN;RPS4Y1;HIF1A;NDRG1;LDHA;PRDX5;UBB;S100A16;PRDX1;PCBP1;S100A13;HMOX1;LTA4H;APOE;S100A11;EGR1;PRNP…
polysomal ribosome (GO:0042788)	11/30	3.41916e-11	8.78725e-10	0	0	24.9433	601.11	RPS26;RPL32;RPL11;RPL36A;EIF3H;RPL24;RPL38;RPL8;RPL39;RPS21;RPL19
Co-upregulated genes (Molecular Function)
Term	Overlap	P-value	Adjusted P-value	Old P-value	Old Adjusted P-value	Odds Ratio	Combined Score	Genes
RNA binding (GO:0003723)	105/1406	1.58671e-27	7.09257e-25	0	0	4.09943	252.968	RPL4;RPL5;RPL3;RPL32;ENO1;PARK7;RPL8;SRP14;RPL9;RPS15;LGALS3;ZFP36;RPS17;LGALS1;RPS16;SNRPD2;RPS19;RPS18;RPL35;RPL38;CPNE3;HMGN2;RPL39;RPS10;RPS13;RPS12;RPL21;RPS8;RPL23;RPL22;RPS6;HLA-A;SLPI;NHP2;RPL24;RPL27;S100A4;ERH;SNRPF;PFN1;RPL28;TXN;RPS4Y1;S100A16;PRDX1;PCBP1;LTA4H;JUN;MSN;TBCA;EEF2;EIF1;MANF;RPS26;RPS25;RPS27;RPS21;NOP10;HSP90AB1;RPLP0;HSPB1;YBX1;YBX3;CSRP1;C1QBP;DSP;CCT3;ANXA2;MRPS24;RP…
cadherin binding (GO:0045296)	37/322	9.94057e-16	2.22172e-13	0	0	5.85305	202.192	HSP90AB1;CAPG;ENO1;PARK7;NDRG1;PSMB6;CNN2;DNAJB1;LDHA;CDH2;CDH1;PCBP1;PRDX1;BSG;EIF4H;SFN;CLIC1;S100A11;ANXA1;ANXA2;HSPA5;RPL23A;EEF2;PRDX6;YWHAZ;RPS26;EEF1G;GPRC5A;EEF1D;RPL24;CTNNB1;MYH9;TAGLN2;PFN1;ALDOA;EPHA2;HSPA1A
ubiquitin protein ligase binding (GO:0031625)	30/265	8.22761e-13	1.22591e-10	0	0	5.67732	157.978	RPL5;CDKN1A;TSG101;HSP90AB1;RPL11;NEDD8;HIF1A;CLU;LAPTM4B;UCHL1;UBB;GABARAPL2;JUN;HSPA5;RPL23;LAPTM5;PRDX6;YWHAZ;NFKBIA;RRAGA;PRKAR1A;UQCRC1;TXNIP;TRIB3;TRIB1;SLC25A5;UBA52;ATP6V0C;SQSTM1;HSPA1A
ubiquitin-like protein ligase binding (GO:0044389)	30/282	4.11114e-12	4.5942e-10	0	0	5.28966	138.681	RPL5;CDKN1A;TSG101;HSP90AB1;RPL11;NEDD8;HIF1A;CLU;LAPTM4B;UCHL1;UBB;GABARAPL2;JUN;HSPA5;RPL23;LAPTM5;PRDX6;YWHAZ;NFKBIA;RRAGA;PRKAR1A;UQCRC1;TXNIP;TRIB3;TRIB1;SLC25A5;UBA52;ATP6V0C;SQSTM1;HSPA1A
oxidoreduction-driven active transmembrane transporter activity (GO:0015453)	12/58	7.15459e-09	5.8062e-07	0	0	11.2486	210.972	COX7A2L;NDUFA12;NDUFS6;UQCRQ;COX4I1;UQCRC1;NDUFA1;COX6A1;COX5B;NDUFV2;UQCRH;COX6B1
oxidoreductase activity, acting on the aldehyde or oxo group of donors, NAD or NADP as acceptor (GO:0016620)	8/20	7.79356e-09	5.8062e-07	0	0	28.5439	532.913	ALDH1A3;ALDH3A1;AKR1B10;ALDH2;ALDH1A1;AKR1C3;AKR1B1;ALDH9A1
proton transmembrane transporter activity (GO:0015078)	9/40	2.60115e-07	1.66102e-05	0	0	12.4456	188.702	COX7A2L;UQCRQ;COX4I1;UQCRC1;COX5B;COX6A1;UQCRH;ATP6V1F;COX6B1
retinal dehydrogenase activity (GO:0001758)	5/8	3.47741e-07	1.94301e-05	0	0	70.9259	1054.8	ALDH1A3;AKR1B10;ALDH1A1;AKR1C3;AKR1B1
kinase binding (GO:0019900)	29/461	1.32323e-06	6.57206e-05	0	0	2.94815	39.9045	PPP1R15A;ERRFI1;CDKN1A;HSP90AB1;SHC1;HSPB1;PARK7;HIF1A;RND3;ACTB;CKS1B;LAPTM4B;ZFP36;RPS19;RPS3;CHP1;FAM83A;NPM1;GADD45A;PGAM1;RPS6;MSN;EEF2;YWHAZ;CKS2;CTNNB1;TRIB3;SQSTM1;ATF4
active ion transmembrane transporter activity (GO:0022853)	8/42	4.66441e-06	0.000208499	0	0	10.063	123.528	COX7A2L;UQCRQ;COX4I1;UQCRC1;COX5B;COX6A1;UQCRH;COX6B1
Co-downregulated genes (Biological Process)
Term	Overlap	P-value	Adjusted P-value	Old P-value	Old Adjusted P-value	Odds Ratio	Combined Score	Genes
cytoplasmic translation (GO:0002181)	47/93	6.51898e-53	1.88855e-49	0	0	49.9551	6002.72	EIF4A2;RPL4;EIF4A1;RPL5;RPL32;RPL10;RPL34;RPLP1;RPL12;RPL11;RPL10A;RPL8;RPL9;RPL6;RPS4X;RPL7A;RPS14;RPS17;RPS16;RPS15A;RPL18A;RPS19;RPS3;RPL35;RPS2;RPS11;RPL18;RPS10;RPL17;RPL19;RPS9;RPS7;RPS8;RPL35A;RPS3A;RPS25;EIF3M;RPS28;RPS29;RPL27A;ETF1;RPL27;RPS20;RPL26;RPS21;RPS24;RPS23
cotranslational protein targeting to membrane (GO:0006613)	46/94	6.1125e-51	8.85396e-48	0	0	46.7331	5403.35	RPL4;RPL5;TRAM1;RPL32;RPL10;RPL34;RPLP1;RPL12;RPL11;RPL10A;RPL8;RPL9;RPL6;RPS4X;RPL7A;RPS14;RPS17;RPS16;RPS15A;RPL18A;RPS19;RPS3;RPL35;RPS2;RPS11;RPL18;RPS10;RPL17;RPL19;RPS9;RPS7;RPS8;SSR2;RPL35A;RPS3A;SRP9;RPS25;RPS28;RPS29;RPL27A;RPL27;RPS20;RPL26;RPS21;RPS24;RPS23
SRP-dependent cotranslational protein targeting to membrane (GO:0006614)	44/90	9.99451e-49	9.65137e-46	0	0	46.4175	5130.27	RPL4;RPL5;RPL32;RPL10;RPL34;RPLP1;RPL12;RPL11;RPL10A;RPL8;RPL9;RPL6;RPS4X;RPL7A;RPS14;RPS17;RPS16;RPS15A;RPL18A;RPS19;RPS3;RPL35;RPS2;RPS11;RPL18;RPS10;RPL17;RPL19;RPS9;RPS7;RPS8;RPL35A;RPS3A;SRP9;RPS25;RPS28;RPS29;RPL27A;RPL27;RPS20;RPL26;RPS21;RPS24;RPS23
nuclear-transcribed mRNA catabolic process, nonsense-mediated decay (GO:0000184)	46/113	2.93058e-46	2.12247e-43	0	0	33.4478	3506.8	RPL4;RPL5;RPL32;RPL10;RPL34;RPLP1;RPL12;EIF4A3;RPL11;RPL10A;RPL8;RPL9;RPL6;RPS4X;RPS14;RPL7A;RPS17;RPS16;RPS15A;RPL18A;RPS19;RPS3;RPL35;RPS2;RPS11;RPL18;RPS10;RPL17;RPL19;RPS9;RPS7;RPS8;RPL35A;RPS3A;RPS25;RPS28;RPS29;RPL27A;RPL27;RPS20;ETF1;EIF3E;RPL26;RPS21;RPS24;RPS23
protein targeting to ER (GO:0045047)	44/103	2.0414e-45	1.18278e-42	0	0	36.1658	3721.56	RPL4;RPL5;RPL32;RPL10;RPL34;RPLP1;RPL12;RPL11;RPL10A;RPL8;RPL9;RPL6;RPS4X;RPS14;RPL7A;RPS17;RPS16;RPS15A;RPL18A;RPS19;RPS3;RPL35;RPS2;RPS11;RPL18;RPS10;RPL17;RPL19;RPS9;RPS7;RPS8;RPL35A;RPS3A;SRP9;RPS25;RPS28;RPS29;RPL27A;RPL27;RPS20;RPL26;RPS21;RPS24;RPS23
nuclear-transcribed mRNA catabolic process (GO:0000956)	48/171	2.88749e-39	1.39418e-36	0	0	19.0523	1690.71	RPL4;RPL5;DDX5;RPL32;RPL10;RPL34;RPLP1;RPL12;EIF4A3;RPL11;RPL10A;RPL8;RPL9;RPL6;ZFP36L1;RPS4X;RPS14;RPL7A;RPS17;RPS16;RPS15A;RPL18A;RPS19;RPS3;RPL35;RPS2;RPS11;RPL18;RPS10;RPL17;RPL19;RPS9;RPS7;RPS8;RPL35A;RPS3A;RPS25;RPS28;RPS29;RPL27A;RPL27;RPS20;ETF1;EIF3E;RPL26;RPS21;RPS24;RPS23
peptide biosynthetic process (GO:0043043)	46/162	6.56324e-38	2.71625e-35	0	0	19.2704	1649.87	RPL4;RPL5;RPL32;RPL10;RPL34;RPLP1;RPL12;RPL11;RPL10A;RPL8;RPL9;RPL6;RPS4X;RPS14;RPL7A;RPS17;RPS16;RPS15A;RPL18A;RPS19;RPS3;RPL35;RPS2;RPS11;RPL18;RPS10;RPL17;RPL19;RPS9;RPS7;RPS8;RPL35A;RPS3A;MRPL23;RPS25;RPS28;MRPL51;RPS29;RPL27A;RPL27;RPS20;RPL26;RPS21;RSL24D1;RPS24;RPS23
translation (GO:0006412)	50/214	1.35036e-36	4.89001e-34	0	0	14.9282	1232.96	RPL4;RPL5;RPL32;RPL34;RPLP1;RPL8;RPL10A;RPL9;RPL6;RPS4X;RPS14;RPL7A;RPS17;RPS16;RPL18A;RPS19;RPL35;RPS11;RPS10;RPS9;MRPS24;RPS7;RPS8;RPS3A;MRPL51;RPL27;ETF1;RPL26;RPL10;RPL12;MRPS34;RPL11;RPS15A;RPS3;RPS2;RPL18;RPL17;RPL19;RPL35A;MRPL23;AIMP2;RPS25;RPS28;RPS29;RPL27A;RPS20;RPS21;RSL24D1;RPS24;RPS23
gene expression (GO:0010467)	57/356	3.15358e-32	1.0151e-29	0	0	9.43621	684.448	RPL4;RPL5;RPL32;RPL34;RPLP1;EIF4A3;RPL8;RPL10A;RPL9;RPL6;RPS4X;RPS14;RPL7A;RPS17;RPS16;RPL18A;RPS19;RPL35;RPS11;RPS10;RPS9;RPS7;RPS8;TESC;RPS3A;MRPL51;DKC1;SRSF2;SRSF3;RPL27;RPL26;SRSF7;RPL10;RPL12;RPL11;HSPD1;RPS15A;RPS3;RPS2;RPL18;RPL17;RPL19;POLR2L;RPL35A;MRPL23;RPS25;RPS28;GOLPH3;HNRNPK;RPS29;RPL27A;HNRNPA2B1;RPS20;RPS21;RSL24D1;RPS24;RPS23
cellular macromolecule biosynthetic process (GO:0034645)	53/314	3.5476e-31	1.02774e-28	0	0	9.96879	698.951	RPL4;RPL5;RPL32;MCM7;RPL34;RPLP1;RPL8;RPL10A;RPL9;RPL6;RPS4X;RPS14;RPL7A;RPS17;RPS16;RPL18A;RPS19;RPL35;RPS11;RPS10;RPS9;RPS7;RPS8;RPS3A;MRPL51;MCM3;RPL27;RPL26;MCM6;TOP1;RPL10;RPL12;RPL11;RPS15A;RPS3;RPS2;RPL18;RPL17;RPL19;POLR2L;RPL35A;MRPL23;RPS25;RPS28;GOLPH3;RPS29;RPL27A;RPA3;RPS20;RPS21;RSL24D1;RPS24;RPS23
Co-downregulated genes (Cellular Component)
Term	Overlap	P-value	Adjusted P-value	Old P-value	Old Adjusted P-value	Odds Ratio	Combined Score	Genes
focal adhesion (GO:0005925)	57/387	2.98894e-30	7.59191e-28	0	0	8.53601	580.301	RPL4;RPL5;RPLP1;TGFB1I1;RPL8;RPL10A;RPL9;RPL6;ACTB;ACTG1;RPS4X;RPL7A;RPS14;GJA1;RPS17;ALCAM;RPS16;RPS19;BSG;RAC1;RPS11;TNS4;RPS10;TNS3;YWHAG;RPS9;ANXA1;RPS7;RPS8;ACTN1;KIF23;RPS3A;ACTN4;RHOA;RPL27;PFN1;PPIB;PPIA;ARF6;RPL12;HSP90B1;CNN3;PCBP2;RPS3;TM4SF20;FLNB;CD59;RPS2;RPL18;RPL19;HSPA8;NPM1;CAV1;HNRNPK;RPS29;VIM;HSPA1A
cell-substrate junction (GO:0030055)	57/394	7.85007e-30	9.96959e-28	0	0	8.35566	559.972	RPL4;RPL5;RPLP1;TGFB1I1;RPL8;RPL10A;RPL9;RPL6;ACTB;ACTG1;RPS4X;RPL7A;RPS14;GJA1;RPS17;ALCAM;RPS16;RPS19;BSG;RAC1;RPS11;TNS4;RPS10;TNS3;YWHAG;RPS9;ANXA1;RPS7;RPS8;ACTN1;KIF23;RPS3A;ACTN4;RHOA;RPL27;PFN1;PPIB;PPIA;ARF6;RPL12;HSP90B1;CNN3;PCBP2;RPS3;TM4SF20;FLNB;CD59;RPS2;RPL18;RPL19;HSPA8;NPM1;CAV1;HNRNPK;RPS29;VIM;HSPA1A
ribosome (GO:0005840)	26/62	5.51254e-27	4.66729e-25	0	0	33.5627	2029.29	RPL32;RPL11;RPL10A;RPL8;RPL9;RPL6;RPS4X;RPL7A;RPS17;SERP1;RPL18A;RPS19;RPS3;RPS11;RPL18;RPS10;RPL19;RPS9;RPS7;RPS25;RPS28;RPS29;APEX1;RPL27;RPS21;RPS23
cytosolic large ribosomal subunit (GO:0022625)	24/55	1.62585e-25	1.03241e-23	0	0	35.8165	2044.36	RPL4;RPL5;RPL32;RPL10;RPL34;RPLP1;RPL12;RPL11;RPL35A;RPL10A;RPL8;RPL9;RPL6;RPL7A;RPL18A;RPL36AL;RPL27A;RPL35;RPL27;RPL26;RPL18;RPL17;RSL24D1;RPL19
cytosolic small ribosomal subunit (GO:0022627)	21/40	1.14699e-24	5.5123e-23	0	0	50.8031	2800.52	RPS9;RPS7;RPS8;RPS3A;RPS4X;RPS14;RPS25;RPS17;RPS28;RPS15A;RPS16;RPS19;RPS29;RPS3;RPS20;RPS2;RPS11;RPS10;RPS21;RPS24;RPS23
large ribosomal subunit (GO:0015934)	24/59	1.30212e-24	5.5123e-23	0	0	31.7167	1744.36	RPL4;RPL5;RPL32;RPL10;RPL34;RPLP1;RPL12;RPL11;RPL35A;RPL10A;RPL8;RPL9;RPL6;RPL7A;RPL18A;RPL36AL;RPL27A;RPL35;RPL27;RPL26;RPL18;RPL17;RSL24D1;RPL19
small ribosomal subunit (GO:0015935)	21/45	2.97603e-23	1.07987e-21	0	0	40.2088	2085.59	RPS9;RPS7;RPS8;RPS3A;RPS4X;RPS14;RPS25;RPS17;RPS28;RPS15A;RPS16;RPS19;RPS29;RPS3;RPS20;RPS2;RPS11;RPS10;RPS21;RPS24;RPS23
intracellular non-membrane-bounded organelle (GO:0043232)	77/1158	3.89073e-18	1.23531e-16	0	0	3.56596	142.952	RPL4;TOP2A;RPL5;POP7;MCM7;BNC1;DDX47;EIF4A3;LPCAT1;CTCF;RPL9;ACTB;ACTG1;RPS4X;RPL7A;RPS14;FBL;RPS17;HINT1;SERP1;RPS19;BASP1;MYC;RPL35;RAC1;RPS11;RPS10;RPS9;ANXA2;RPS7;TUBB;TMOD3;KIF23;RPS3A;ILF2;RHOA;DKC1;NCL;MCM3;RPL27;RPL26;TOP1;S100A9;GAPDH;S100A8;DDX5;RPL11;NOP2;DDX21;AURKA;REPIN1;CYB5R3;S100A16;RRS1;RPS3;RPS2;RPL18;FAM83D;ZNF146;RPL19;NOP56;NOP58;NPM1;CBX3;CAV1;PLK1;TUBB4B;VMP1;RPS25;CENPF;P…
nucleus (GO:0005634)	174/4484	1.14919e-15	3.24327e-14	0	0	2.26257	77.8318	RPL4;RPL5;EIF4A1;POP7;EIF4A3;MT1X;ENO1;PARK7;RPL10A;RPL9;PHB2;RPL6;ACTB;ACTG1;FBL;MT2A;RGS2;SNRPD2;TRIM28;PTTG1;TUBB3;RPL36AL;BASP1;MYC;KPNA2;IER2;SOX4;IER3;RPS9;RPS7;RPS8;ZNF281;IGFBP3;KRT8;ACTN4;ILF2;CDC25B;DKC1;NCL;S100A6;SNRPG;SRSF2;VDAC2;RPL27;ERH;MT1H;SIK1;TRIB3;ADNP;PPEF1;PFN1;PPIB;S100A9;SRSF7;PPIA;S100A8;ATF4;MT1E;DDX5;STC1;OAZ1;PRPF8;HSP90B1;ZFP36L1;CCNB2;LDHA;HSPH1;UBB;S100A16;PCBP1;PC…
polysomal ribosome (GO:0042788)	13/30	2.40507e-14	6.10888e-13	0	0	34.5036	1081.99	RPL32;RPL11;RPL10A;RPL8;RPL6;RPL7A;RPS28;RPL18A;RPS29;RPL18;RPS21;RPL19;RPS23
Co-downregulated genes (Molecular Function)
Term	Overlap	P-value	Adjusted P-value	Old P-value	Old Adjusted P-value	Odds Ratio	Combined Score	Genes
RNA binding (GO:0003723)	133/1406	4.73432e-49	2.35296e-46	0	0	6.10209	678.991	RPL4;EIF4A2;RPL5;EIF4A1;POP7;TFRC;RPL32;RPL34;EIF4A3;ENO1;PARK7;RPL8;RPL10A;RPL9;RPL6;RPS14;FBL;RPS17;RPS16;RPS19;SNRPD2;RPL18A;TRIM28;RPL35;KPNA2;RPS11;RPS10;RPS9;RPS7;RPS8;ACTN1;ACTN4;ILF2;DKC1;NCL;SNRPG;SRSF2;SRSF3;RPL27;ERH;RPL26;FKBP4;PFN1;PPIB;SRSF7;PPIA;SNRPA;DDX5;NOP2;PRPF8;HSP90B1;ZFP36L1;S100A16;PCBP1;PCBP2;UBC;RRS1;TRAP1;HSPA8;MRPL23;EIF2S2;EIF1;MANF;HNRNPM;RPS25;RPS28;HNRNPK;RPL27A;RP…
mRNA binding (GO:0003729)	31/263	3.91368e-14	9.7255e-12	0	0	6.22125	192.061	EIF4A1;RPL5;DDX5;DDX3X;EIF4A3;PARK7;YBX3;ZFP36L1;CRYZ;RPS14;PCBP1;TRA2B;PCBP2;RPS3;RPL35;RPS2;YTHDF2;SSB;RPS7;RPS3A;EIF2S2;HNRNPAB;PTBP3;HNRNPM;HNRNPK;PKM;NCL;HNRNPA2B1;ETF1;RPL26;RBMX
cadherin binding (GO:0045296)	31/322	8.79991e-12	1.45785e-09	0	0	4.94475	125.875	DDX3X;HSP90AB1;RPL34;PTPRO;SLC3A2;ENO1;PARK7;RPL6;CNN3;CCNB2;RPL7A;DNAJB1;LDHA;PCBP1;BSG;FLNB;RPS2;NOP56;RANBP1;HSPA8;ANXA1;ANXA2;TMOD3;HNRNPK;KRT18;PKM;EIF3E;PFN1;PFKP;RAN;HSPA1A
double-stranded RNA binding (GO:0003725)	12/73	7.00895e-08	8.70861e-06	0	0	8.83569	145.555	EIF4A1;TUBA1B;DDX3X;HSP90AB1;TFRC;ACTN1;DHX15;SLC3A2;VIM;TUBB4B;ILF2;HSPD1
protein kinase binding (GO:0019901)	31/506	4.27836e-07	4.25269e-05	0	0	3.00038	43.9991	TOP2A;ERRFI1;CDKN1B;TFRC;GSTP1;ACTB;AURKA;HINT1;RPS19;CAMK2N1;RPS3;RAC1;FAM83D;YWHAG;TRAP1;HSP90AA1;NPM1;RPS7;DUSP1;CAV1;PLK1;EMP2;RHOA;CDC25B;PRC1;CKS2;SIK1;TRIB3;CD24;CALM1;ATF4
ubiquitin protein ligase binding (GO:0031625)	21/265	5.81356e-07	4.81557e-05	0	0	3.91041	56.1453	RPL5;GPI;CCT2;HSPA8;HSP90AA1;HSP90AB1;TUBB;RPL11;MID1;ACTG1;HSPD1;NFKBIA;DNAJA1;TUBA1B;TRIM28;UBB;PCBP2;UBC;TRIB3;CKB;HSPA1A
mRNA 5'-UTR binding (GO:0048027)	7/25	8.88328e-07	6.30713e-05	0	0	17.306	241.14	RPL5;RPS14;DDX3X;RPS7;NCL;RPS3A;RPL26
ubiquitin-like protein ligase binding (GO:0044389)	21/282	1.5929e-06	9.89591e-05	0	0	3.65249	48.7606	RPL5;GPI;CCT2;HSPA8;HSP90AA1;HSP90AB1;TUBB;RPL11;MID1;ACTG1;HSPD1;NFKBIA;DNAJA1;TUBA1B;TRIM28;UBB;PCBP2;UBC;TRIB3;CKB;HSPA1A
rRNA binding (GO:0019843)	8/42	3.48512e-06	0.000192456	0	0	10.4862	131.78	RPL5;RPS14;RPS9;RPL12;RPL11;RPS3;RRS1;DDX21
kinase binding (GO:0019900)	27/461	5.55084e-06	0.000275877	0	0	2.83889	34.3549	ERRFI1;CDKN1B;HSP90AB1;TFRC;PARK7;ACTB;AURKA;RPS19;CAMK2N1;RPS3;RAC1;FAM83D;TRAP1;NPM1;RPS7;CAV1;PLK1;EMP2;RHOA;CDC25B;PRC1;CKS2;SIK1;TRIB3;CD24;CALM1;ATF4
