# Supplementary material for: Signatures of Co-Deregulated Genes and Their Transcriptional Regulators in Lung Cancer
Source: Int J Mol Sci. 2022 Sep 18;23(18):10933. doi: 10.3390/ijms231810933 (PMC9504879; doi:10.3390/ijms231810933)
Supplement: Supplementary file 1 [file ijms-23-10933-s001.zip › Table S13.xlsx]

## Sheet: Table S13
Table S13: KEGG enrichment analysis for the co-DEGs in CRC after single-drug perturbation. The terms are sorted according to the combined score.
Co-upregulated genes
Term	Overlap	P-value	Adjusted P-value	Old P-value	Old Adjusted P-value	Odds Ratio	Combined Score	Genes
Ribosome	47/158	5.78794e-39	1.52223e-36	0	0	19.7242	1736.62	RPL4;RPL5;RPL3;RPL32;RPL12;RPLP0;RPL11;RPL36A;RPS27L;RPL8;RPS4Y1;RPL9;MRPL33;RPS15;RPS17;RPS16;RPS15A;RPS19;RPS18;RPS3;RPL35;RPLP2;RPL38;RPL39;RPS10;RPL17;RPS13;RPS12;RPL19;RPL21;RPS8;RPL23;RPL22;RPS6;RPL13A;RPS3A;RPL23A;RPS26;RPS25;RPS27;RPL37A;RPL24;RPL27;FAU;RPL28;UBA52;RPS21
Coronavirus disease	51/232	4.7437e-35	6.23797e-33	0	0	13.2049	1043.63	RPL4;RPL5;RPL3;RPL32;RPLP0;RPL8;RPL9;RPS15;RPS17;RPS16;RPS19;RPS18;RPL35;RPLP2;RPL38;RPL39;RPS10;RPS13;RPS12;RPL21;RPS8;RPL23;RPL22;RPS6;RPL13A;RPS3A;IL1B;RPL37A;RPL24;RPL27;RPL28;UBA52;RPL12;RPL11;RPL36A;RPS27L;RPS4Y1;RPS15A;RPS3;CCL2;RPL17;RPL19;JUN;MX1;RPL23A;RPS26;NFKBIA;RPS25;RPS27;FAU;RPS21
Parkinson disease	34/249	7.84877e-17	6.88075e-15	0	0	7.10561	263.502	COX7B;UQCRB;NDUFA12;NDUFB11;COX4I1;COX7A2;TXN;PARK7;COX5B;COX6A1;COX7C;UQCRH;PSMD8;PSMB6;PSMB7;UCHL1;TUBA1A;UBB;PSMB3;NDUFV2;HSPA5;DUSP1;NDUFA1;COX6B1;COX7A2L;PSMA1;UQCRQ;NDUFS6;NDUFAB1;UQCRC1;SLC25A5;UBA52;ATF4;SLC25A6
Prion disease	34/273	1.33649e-15	8.78745e-14	0	0	6.38414	218.649	COX7B;UQCRB;NDUFA12;NDUFB11;COX4I1;COX7A2;COX5B;COX6A1;COX7C;UQCRH;PSMD8;PSMB6;PSMB7;TUBA1A;PSMB3;NDUFV2;EGR1;PRNP;HSPA5;NDUFA1;CYBA;COX6B1;SOD1;COX7A2L;PSMA1;UQCRQ;NDUFS6;IL1B;NDUFAB1;UQCRC1;SLC25A5;ATF4;HSPA1A;SLC25A6
Huntington disease	33/306	2.28562e-13	1.07012e-11	0	0	5.40254	157.252	COX7B;UQCRB;NDUFA12;NDUFB11;COX4I1;CLTA;COX7A2;COX5B;COX6A1;COX7C;UQCRH;PSMD8;PSMB6;PSMB7;TUBA1A;PSMB3;POLR2G;NDUFV2;POLR2L;GPX2;GPX1;NDUFA1;SOD2;COX6B1;SOD1;COX7A2L;PSMA1;UQCRQ;NDUFS6;NDUFAB1;UQCRC1;SLC25A5;SLC25A6
Diabetic cardiomyopathy	27/203	2.44134e-13	1.07012e-11	0	0	6.79634	197.373	COX7B;UQCRB;NDUFA12;NDUFB11;COX4I1;COX7A2;COX5B;COX6A1;COX7C;UQCRH;PDK4;NDUFV2;CTSD;G6PD;GFPT2;NDUFA1;CYBA;COX6B1;COX7A2L;COL3A1;UQCRQ;NDUFS6;NDUFAB1;UQCRC1;SLC25A5;GAPDH;SLC25A6
Pathways of neurodegeneration	41/475	4.88795e-13	1.83647e-11	0	0	4.26612	120.931	COX7B;UQCRB;NDUFA12;NDUFB11;COX4I1;COX7A2;PARK7;COX5B;COX6A1;COX7C;UQCRH;PSMD8;PSMB6;PSMB7;UCHL1;TUBA1A;UBB;PSMB3;NDUFV2;GABARAPL2;PRNP;GPX2;GPX1;HSPA5;NDUFA1;DKK1;COX6B1;SOD1;COX7A2L;PSMA1;UQCRQ;NDUFS6;IL1B;NDUFAB1;UQCRC1;CTNNB1;SLC25A5;UBA52;SQSTM1;ATF4;SLC25A6
Amyotrophic lateral sclerosis	33/364	2.73434e-11	8.98913e-10	0	0	4.44245	108.052	COX7B;UQCRB;NDUFA12;NDUFB11;COX4I1;COX7A2;COX5B;COX6A1;COX7C;ACTB;UQCRH;PSMD8;PSMB6;PSMB7;TUBA1A;PSMB3;NDUFV2;GABARAPL2;GPX2;GPX1;HSPA5;NDUFA1;COX6B1;SOD1;COX7A2L;PSMA1;UQCRQ;NDUFS6;NDUFAB1;UQCRC1;PFN1;SQSTM1;ATF4
Oxidative phosphorylation	20/133	3.32387e-11	9.71309e-10	0	0	7.74257	186.807	COX7B;UQCRB;NDUFA12;NDUFB11;COX4I1;NDUFA1;COX7A2;COX6A1;COX5B;COX7C;UQCRH;COX6B1;COX7A2L;UQCRQ;NDUFS6;NDUFAB1;UQCRC1;NDUFV2;ATP6V0C;ATP6V1F
Non-alcoholic fatty liver disease	21/155	8.08589e-11	2.12659e-09	0	0	6.86368	159.5	JUN;COX7B;UQCRB;NDUFA12;NDUFB11;COX4I1;NDUFA1;COX7A2;COX6A1;COX5B;COX7C;UQCRH;COX6B1;COX7A2L;UQCRQ;NDUFS6;IL1B;NDUFAB1;UQCRC1;NDUFV2;ATF4
Co-downregulated genes
Term	Overlap	P-value	Adjusted P-value	Old P-value	Old Adjusted P-value	Odds Ratio	Combined Score	Genes
Ribosome	46/158	1.84049e-38	4.74845e-36	0	0	19.9628	1734.53	RPL4;RPL5;RPL32;RPL10;RPL34;RPLP1;RPL12;RPL11;RPL10A;RPL8;RPL9;RPL6;RPS4X;RPS14;RPL7A;RPS17;RPS16;RPS15A;RPL18A;RPS19;RPL36AL;RPS3;RPL35;RPS2;RPS11;RPL18;RPS10;RPL17;RPL19;RPS9;RPS7;RPS8;RPL35A;RPS3A;MRPL23;RPS25;RPS28;RPS29;RPL27A;RPL27;RPS20;RPL26;RPS21;RSL24D1;RPS24;RPS23
Coronavirus disease	51/232	6.58942e-36	8.50036e-34	0	0	13.8195	1119.48	RPL4;RPL5;RPL32;RPL34;RPLP1;RPL8;RPL10A;RPL9;RPL6;RPS4X;RPS14;RPL7A;RPS17;RPS16;RPL18A;RPS19;RPL36AL;RPL35;IL12A;RPS11;RPS10;RPS9;RPS7;RPS8;FGG;RPS3A;TNFRSF1A;RPL27;RPL26;CFD;RPL10;RPL12;RPL11;RPS15A;RPS3;RPS2;RPL18;RPL17;RPL19;RPL35A;NFKBIA;RPS25;CXCL10;RPS28;RPS29;RPL27A;RPS20;RPS21;RSL24D1;RPS24;RPS23
Parkinson disease	30/249	5.68395e-14	4.8882e-12	0	0	6.3669	194.181	NDUFB9;COX7B;UQCRB;ATP6;COX7A2;PARK7;COX5B;TUBA1C;TUBA1B;TUBA1A;UBB;TUBB3;UBC;COX2;COX1;COX8A;TRAP1;XBP1;DUSP1;TUBB;COX6C;TUBB4B;COX6B1;TUBB2B;PSMC6;VDAC2;CALM1;ND2;ATF4;SLC25A6
Prion disease	28/273	2.0552e-11	1.3256e-09	0	0	5.27929	129.913	NDUFB9;COX7B;UQCRB;ATP6;COX7A2;COX5B;TUBA1C;TUBA1B;TUBA1A;TUBB3;COX2;COX1;RAC1;COX8A;EGR1;HSPA8;TUBB;CAV1;COX6C;TUBB4B;COX6B1;TUBB2B;PSMC6;VDAC2;ND2;ATF4;HSPA1A;SLC25A6
Amyotrophic lateral sclerosis	32/364	4.42157e-11	2.28153e-09	0	0	4.47518	106.697	NDUFB9;COX7B;UQCRB;ATP6;COX7A2;COX5B;ACTB;ACTG1;TUBA1C;TUBA1B;TUBA1A;TUBB3;COX2;COX1;RAC1;COX8A;XBP1;GPX2;TUBB;WIPI1;COX6C;TUBB4B;COX6B1;TNFRSF1A;TUBB2B;PSMC6;HNRNPA2B1;SRSF3;PFN1;ND2;SRSF7;ATF4
Salmonella infection	26/249	7.30675e-11	3.1419e-09	0	0	5.36628	125.247	HSP90AB1;ACTB;MYL12A;ACTG1;HSP90B1;TUBA1C;TUBA1B;TUBA1A;TUBB3;MYC;RPS3;FLNB;RAC1;S100A10;HSP90AA1;ANXA2;TUBB;DYNLL1;TUBB4B;RHOA;TNFRSF1A;NFKBIA;TUBB2B;PFN1;GAPDH;ARF6
Pathways of neurodegeneration	35/475	6.79242e-10	2.50349e-08	0	0	3.69935	78.0934	NDUFB9;COX7B;UQCRB;ATP6;ATP2A2;COX7A2;PARK7;COX5B;TUBA1C;TUBA1B;TUBA1A;UBB;TUBB3;UBC;COX2;COX1;RAC1;COX8A;TRAP1;GPX2;XBP1;TUBB;WIPI1;TUBB4B;COX6C;DKK1;TNFRSF1A;COX6B1;TUBB2B;PSMC6;VDAC2;CALM1;ND2;ATF4;SLC25A6
Alzheimer disease	30/369	1.19115e-09	3.84147e-08	0	0	4.0876	83.9935	NDUFB9;COX7B;UQCRB;ATP6;ATP2A2;COX7A2;COX5B;TUBA1C;TUBA1B;TUBA1A;TUBB3;COX2;COX1;COX8A;XBP1;TUBB;WIPI1;COX6C;TUBB4B;DKK1;COX6B1;TNFRSF1A;TUBB2B;PSMC6;VDAC2;CALM1;ND2;GAPDH;ATF4;SLC25A6
Huntington disease	25/306	2.68106e-08	7.68571e-07	0	0	4.07287	71.0084	NDUFB9;COX7B;UQCRB;ATP6;COX7A2;COX5B;TUBA1C;TUBA1B;TUBA1A;TUBB3;COX2;COX1;POLR2L;COX8A;GPX2;TUBB;WIPI1;COX6C;TUBB4B;COX6B1;TUBB2B;PSMC6;VDAC2;ND2;SLC25A6
Spliceosome	17/150	4.3861e-08	1.13161e-06	0	0	5.78644	98.0353	HSPA8;DDX5;EIF4A3;PRPF8;HNRNPM;HNRNPK;SNRPD2;PCBP1;TRA2B;SNRPG;SRSF2;DHX15;SRSF3;SRSF7;RBMX;SNRPA;HSPA1A
