# Supplementary material for: Signatures of Co-Deregulated Genes and Their Transcriptional Regulators in Lung Cancer
Source: Int J Mol Sci. 2022 Sep 18;23(18):10933. doi: 10.3390/ijms231810933 (PMC9504879; doi:10.3390/ijms231810933)
Supplement: Supplementary file 1 [file ijms-23-10933-s001.zip › Table S14.xlsx]

## Sheet: Table S14
Table S14: Protein-protein interaction (PPI) sub-network around proteins encoded by the co-upregulated genes in LC after single-drug perturbation.
X2K
Rank	Transcription Factor	Hypergeometric p-value	Z-score	Combined score	Enriched Targets
1	MYC	2.375e-22	0	0	" title="Overlapping EnrichrTargets" data-content="MYC targets 68 genes from the input gene list.Associations were determined from the following experiment:The full list of targets is available below:RPL4 RPL5 RPL3 RPL32 RPL8 RPL35 RPL38 IER2 RPL21 RPL23 RPL22 RPL27 RPL28 RPLP2 ANGPTL4 RPL12 RPL11 RPS27L RPS15A RPS3 RPL17 RPL19 TXNL4A RPS8 RPS6 NHP2 FTL EEF2 NACA IARS NOP10 HSP90AB1 PTP4A1 RPL37A…
2	TAF1	9.697e-19	0	0	" title="Overlapping EnrichrTargets" data-content="TAF1 targets 177 genes from the input gene list.Associations were determined from the following experiment:The full list of targets is available below:MTHFD2 DDIT4 JUN DUSP5 DUSP1 UQCRB UQCRH RAP1B UQCRQ GAPDH BSG HERPUD1 MRPS24 COX5B NDUFAB1 ACOT13 TSG101 NDUFB11 EEF1G EEF1D SLIRP BTG2 RPS15A FGD6 PARK7 CFL1 TPT1 RPS15 RPS16 RPS19 RPS10 RPS13 RP…
3	NELFE	1.691e-17	0	0	" title="Overlapping EnrichrTargets" data-content="NELFE targets 39 genes from the input gene list.Associations were determined from the following experiment:The full list of targets is available below:RPL3 ACTB RPS16 BSG B2M RPL39 JUNB RPS13 DDIT4 ATF4 LDHA PRDX1 EGR1 H3F3B GADD45A SNHG6 EIF1 RPS27 RPLP0 HERPUD1 DUSP1 PABPC1 SLC20A1 RPL12 NPM1 GDF15 CTNNB1 CFL1 RPS6 MALAT1 FTL NDUFB11 HSPA5 EEF2…
4	TAF7	3.226e-13	0	0	" title="Overlapping EnrichrTargets" data-content="TAF7 targets 56 genes from the input gene list.Associations were determined from the following experiment:The full list of targets is available below:RPL4 RPL5 RPL3 RPL32 ENO1 PSMD8 RPL35 RPL38 JUNB RPL27 RPL28 ATF4 PRDX1 JUN H3F3B EIF1 RPLP0 DUSP1 CKS2 RPL11 RPS15A RPS3 RPL17 HMGN2 RPS8 RPS6 FTL EEF2 NACA HSP90AB1 RPL13A PTP4A1 RPL37A POLR2L RPL…
5	KAT2A	2.188e-12	0	0	" title="Overlapping EnrichrTargets" data-content="KAT2A targets 21 genes from the input gene list.Associations were determined from the following experiment:The full list of targets is available below:RPL4 RPL5 HSP90AB1 RPL32 RPL9 RPS15 CFL1 RPS8 RPS6 EEF1G RPL24 RPL27 ERH RPL12 RPL11 PCBP1 RPS3 EGR1 HSPA5 NACA CTNNB1" style="cursor: pointer; text-decoration: underline dotted;">21 targets
6	MYC	1.938e-11	0	0	" title="Overlapping EnrichrTargets" data-content="MYC targets 90 genes from the input gene list.Associations were determined from the following experiment:The full list of targets is available below:MTHFD2 ATF4 TIPARP RPLP0 RPLP2 DUSP1 CKS2 PSMB3 UQCRH EEF2 NACA NOP10 HSP90AB1 SLC25A6 EIF4H RPL23A SNRPD2 TAGLN2 PCBP1 HERPUD1 CTSC CCT3 AKR1A1 PABPC1 CD63 NPM1 HDGF EEF1B2 BANF1 HMGA1 BHLHE40 EEF1D…
7	CHD1	2.348e-11	0	0	" title="Overlapping EnrichrTargets" data-content="CHD1 targets 53 genes from the input gene list.Associations were determined from the following experiment:The full list of targets is available below:RPL39 JUNB RPL22 DDIT4 RPL28 RPN2 LDHA S100A11 JUN EIF1 CKS2 RNASEK RPS27L RPS15A RPL19 DHRS3 CFL1 RPS8 SQSTM1 FTL SHC1 UQCRH RAP1B EEF2 ARPC2 UQCRQ LBH PTP4A1 POLR2L PNRC1 KDELR1 PFN1 MYL12B GADD45…
8	CEBPB	3.115e-11	0	0	" title="Overlapping EnrichrTargets" data-content="CEBPB targets 24 genes from the input gene list.Associations were determined from the following experiment:The full list of targets is available below:ACTB NARS COTL1 RPL23 SLPI DDIT4 TRIB1 PRR13 UBB GADD45A EIF1 NFKBIA BHLHE40 IARS DBI YBX3 HERPUD1 RPL13A PTP4A1 PPP1R15B CEBPB NFIL3 PSMB3 XPOT" style="cursor: pointer; text-decoration: underline …
9	KLF4	6.504e-11	0	0	" title="Overlapping EnrichrTargets" data-content="KLF4 targets 67 genes from the input gene list.Associations were determined from the following experiment:The full list of targets is available below:GABARAPL2 TXNIP ATF4 PDGFA FN1 HEXB TSPO GPRC5A UCP2 SPP1 FABP5 HSP90AB1 ATRAID GAPDH PPP1R15B EIF4H ACTB LGALS3 ECH1 TAGLN2 PCBP1 APOE NDRG1 MSN YWHAQ YWHAZ RCN1 BLVRB RPL5 ENO1 RPL8 MYC JUNB IER2 …
10	MAX	1.078e-10	0	0	" title="Overlapping EnrichrTargets" data-content="MAX targets 109 genes from the input gene list.Associations were determined from the following experiment:The full list of targets is available below:MTHFD2 TXNIP TIPARP DUSP1 LAPTM4B FADS1 SHC1 NACA NOP10 EIF4H BSG TRIB1 SDC1 HERPUD1 PABPC1 HDGF EEF1B2 NARS BHLHE40 EEF1D VIMP PHB2 LDHA FOSL1 SQLE GRN RPS15A PARK7 CFL1 TXNL4A PGD RPL13A CEBPB POL…
11	TCF3	1.149e-10	0	0	" title="Overlapping EnrichrTargets" data-content="TCF3 targets 60 genes from the input gene list.Associations were determined from the following experiment:The full list of targets is available below:PRKAR1A DDIT4 ATF4 TIPARP DUSP5 DUSP1 SQSTM1 FTL RAP1B EEF2 NACA HSP90AB1 COX4I1 ERRFI1 ACTB LGALS1 BSG TAGLN2 TRIB1 ATP5B PCBP1 EGR1 CD63 OST4 TRIAP1 EEF1D RPL3 ENO1 ALCAM CYP1B1 RPL35 JUNB HIF1A P…
12	PML	2.648e-10	0	0	" title="Overlapping EnrichrTargets" data-content="PML targets 90 genes from the input gene list.Associations were determined from the following experiment:The full list of targets is available below:MTHFD2 DDIT4 JUN TIPARP DUSP1 FTL TMBIM4 GAPDH TRIB1 PABPC1 COX5B TSG101 EEF1G EEF1D MKNK2 SLIRP LDHA ARPC1A RPS15A CFL1 RPL13A DNAJB1 SEC11A RPS16 RPS19 FTH1 RPS12 TXN RPS25 RPS21 TMED2 CSTB UBB RPS…
13	CEBPD	4.04e-10	0	0	" title="Overlapping EnrichrTargets" data-content="CEBPD targets 54 genes from the input gene list.Associations were determined from the following experiment:The full list of targets is available below:ENO1 RPL9 MYC JUNB RPL23 MYL6 DDIT4 RPL24 TXNIP ATF4 JUN H3F3B EIF1 BTG2 RPLP0 DUSP1 ANXA4 CKS2 CFL1 HMGN2 RPS6 MALAT1 FTL UQCRH EEF2 IARS RPL13A TMBIM4 PPP1R15A CEBPB POLR2G TPT1 ACTB FTH1 BSG RRA…
14	ZMIZ1	9.833e-10	0	0	" title="Overlapping EnrichrTargets" data-content="ZMIZ1 targets 61 genes from the input gene list.Associations were determined from the following experiment:The full list of targets is available below:MYL6 DDIT4 ATF4 TIPARP EIF1 RPLP0 DUSP1 MRPL51 RPS27L SQSTM1 FTL ARPC2 HSP90AB1 COX4I1 SLC25A15 SLC25A5 ACTB LGALS1 TAGLN2 TRIB3 EGR1 HERPUD1 CCT3 PTPLAD1 ACOT13 NDRG1 HMGA1 GCLC H1F0 SOD1 MYC JUNB…
15	E2F1	1.79e-09	0	0	" title="Overlapping EnrichrTargets" data-content="E2F1 targets 58 genes from the input gene list.Associations were determined from the following experiment:The full list of targets is available below:RNASE4 SFN LTA4H EIF1 RPLP2 PSMA1 RPS27L RABAC1 EEF2 NPC2 RPL23A BSG SDC4 ATP5L TSPAN3 HERPUD1 AHCY G6PD NDUFV2 H1F0 EEF1G NDUFS6 BLVRB RRM1 RRM2 RPL3 EPS8 MYC FDXR RPL39 RPL21 HIF1A S100A13 S100A10…
16	ATF2	8.097e-09	0	0	" title="Overlapping EnrichrTargets" data-content="ATF2 targets 130 genes from the input gene list.Associations were determined from the following experiment:The full list of targets is available below:MTHFD2 DDIT4 TXNIP ATF4 LTA4H JUN DUSP1 LAPTM4B FTL UQCRB SHC1 UQCRQ NACA NOP10 ITGB8 GAPDH SNRPD2 TRIB1 APOE EGR1 COX7B HERPUD1 EEF1B2 TSG101 EEF1G ELF3 RRM1 PHB2 FOSL1 BTG3 BTG2 NSA2 RPS15A FGD6 …
17	PPARG	4.34e-07	0	0	" title="Overlapping EnrichrTargets" data-content="PPARG targets 38 genes from the input gene list.Associations were determined from the following experiment:The full list of targets is available below:LIPA CYP1B1 RNASE4 RBP7 DDIT4 RPL27 ATF4 JUN CDKN1A GSTO1 ANGPTL4 DHRS3 FABP5 FADS2 CHP1 APOA1BP ARPC2 TMBIM4 ACTB ECH1 RRAGA MMADHC MGST1 PCBP1 CBR1 SLC20A1 SCARB1 UBB COX14 HSPA5 DBI ATP5G2 YBX3 …
18	BRCA1	1.441e-06	0	0	" title="Overlapping EnrichrTargets" data-content="BRCA1 targets 133 genes from the input gene list.Associations were determined from the following experiment:The full list of targets is available below:MTHFD2 DDIT4 TXNIP JUN DUSP1 FADS1 UQCRQ GAPDH COX7B MRPS24 COX5B COX14 TNFAIP8 EEF1G EEF1D RRM1 ALCAM RPS15A FGD6 PARK7 CFL1 TPT1 RPS15 RPS16 RPS19 RPS26 RPS25 TMED2 UBB DBI RPS3A RNASE4 RPLP0 RP…
19	STAT3	6.53e-06	0	0	" title="Overlapping EnrichrTargets" data-content="STAT3 targets 43 genes from the input gene list.Associations were determined from the following experiment:The full list of targets is available below:MYC RPL38 JUNB RNASE4 DDIT4 RPL24 RPL27 RPL28 RPN2 PRDX5 JUN TIPARP BTG2 DUSP1 PSMB3 SAT1 SHC1 ITGB8 PTP4A1 PPP1R15B DNAJB1 PNRC1 RAB13 EIF3H MT2A TXN EGR1 GADD45A SEC61G TMED2 NME1 ALDOA SLC20A1 T…
20	NFE2L2	1.033e-05	0	0	" title="Overlapping EnrichrTargets" data-content="NFE2L2 targets 54 genes from the input gene list.Associations were determined from the following experiment:The full list of targets is available below:FN1 AREG MRPL33 DUSP1 F3 LAPTM4B SQSTM1 FTL EIF3H TALDO1 SLPI TRIB1 MMADHC TSPAN3 CTSB AKR1A1 G6PD GCLC GCLM RND3 YWHAZ BLVRB RPL5 SERPINE1 CYP1B1 SERPINF1 PRR13 PRDX1 HMOX1 FDFT1 PRDX6 CDKN1A ANX…
21	PPARD	1.354e-05	0	0	" title="Overlapping EnrichrTargets" data-content="PPARD targets 23 genes from the input gene list.Associations were determined from the following experiment:The full list of targets is available below:RPS16 MYC FTH1 KRT7 TXNIP GADD45A SH3RF1 ANXA1 PLIN2 ANGPTL4 MFGE8 PSMB6 HDGF MRFAP1 CDH2 MALAT1 FTL COX4I1 DBI KLF10 ABCC3 DYNLT1 MYH9" style="cursor: pointer; text-decoration: underline dotted;">…
22	SPI1	2.465e-05	0	0	" title="Overlapping EnrichrTargets" data-content="SPI1 targets 54 genes from the input gene list.Associations were determined from the following experiment:The full list of targets is available below:LTA4H DUSP5 PGAM1 EMP3 CKS2 PSMB3 UCP2 S100A4 FTL ARPC2 SNRPD2 TALDO1 TRIB1 CD14 CD53 TCEB1 COX6A1 EEF1B2 BANF1 COX14 BHLHE40 TNFAIP8 TRIAP1 YWHAZ EEF1G RPL8 RPL38 JUNB IER2 RPL23 RPL27 RPL28 PRR13 …
23	CREB1	2.609e-05	0	0	" title="Overlapping EnrichrTargets" data-content="CREB1 targets 68 genes from the input gene list.Associations were determined from the following experiment:The full list of targets is available below:MYL6 DDIT4 ATF4 EIF1 TUBA1A RPLP2 DUSP1 RABAC1 FADS2 EEF2 UQCRQ SLC25A3 HSP90AB1 GAPDH PPP1R15B EIF3I ACTB TRIB1 ATP5B EGR1 CCT3 PABPC1 CAPG NFIL3 TCEB1 NPM1 TSG101 COX14 YWHAQ YWHAZ EEF1D RRM1 FDX…
24	NFIC	8.154e-05	0	0	" title="Overlapping EnrichrTargets" data-content="NFIC targets 21 genes from the input gene list.Associations were determined from the following experiment:The full list of targets is available below:EPS8 MT2A ECH1 LDHA EGR1 JUN GADD45A TIPARP DUSP1 PSMB7 PSMB3 CFL1 HMGA1 NFKBIA BHLHE40 NOP10 HSPB1 KLF10 EEF1D GAPDH PNRC1" style="cursor: pointer; text-decoration: underline dotted;">21 targets
25	SRF	0.0002006	0	0	" title="Overlapping EnrichrTargets" data-content="SRF targets 21 genes from the input gene list.Associations were determined from the following experiment:The full list of targets is available below:RPL32 ACTB JUNB IER2 GABARAPL2 RPL22 ECH1 RPL24 PFN1 EGR1 FOSL1 DUSP5 RPS15A HDGF EEF1B2 CFL1 PFKFB3 CNN2 TRIAP1 RRM1 EIF3H" style="cursor: pointer; text-decoration: underline dotted;">21 targets
26	RUNX1	0.000219	0	0	" title="Overlapping EnrichrTargets" data-content="RUNX1 targets 59 genes from the input gene list.Associations were determined from the following experiment:The full list of targets is available below:RNASE4 MTHFD2 PRKAR1A TIPARP LGMN DUSP1 EMP3 CKS2 GPR56 FADS1 S100A6 FTL RAP1B TMBIM4 LGALS3 LGALS1 TRIB1 EGR1 CTSL CTSD AKR1A1 NPM1 HDGF HMGA1 GCLC BHLHE40 TRIAP1 MKNK2 RRM1 SOD2 SERPINE1 ENO1 JUN…
27	SIN3A	0.0002503	0	0	" title="Overlapping EnrichrTargets" data-content="SIN3A targets 53 genes from the input gene list.Associations were determined from the following experiment:The full list of targets is available below:MTHFD2 DDIT4 RPLP0 DUSP1 MRPL51 CKS2 RNASEK RPS27L EEF2 HSP90AB1 GAPDH FOXJ1 SNRPD2 ATP5L HERPUD1 PABPC1 NPM1 NARS BANF1 TSG101 NDRG1 EEF1D RRM2 RPL4 PHB2 MYC JUNB IER3 RPL23 RPL24 UBA52 HIF1A LDHA…
28	NR2C2	0.0002515	0	0	" title="Overlapping EnrichrTargets" data-content="NR2C2 targets 23 genes from the input gene list.Associations were determined from the following experiment:The full list of targets is available below:RPL35 RPL22 RPL27 PCBP1 RPS26 RPS25 RPS21 MRPL33 NEDD8 PSMB7 RPS15A HDGF BANF1 ATP11A PGD SNRPF TMED10 NACA ACBD3 RPS3A TMBIM4 SLC25A6 SLIRP" style="cursor: pointer; text-decoration: underline dott…
29	ZNF384	0.0003011	0	0	" title="Overlapping EnrichrTargets" data-content="ZNF384 targets 38 genes from the input gene list.Associations were determined from the following experiment:The full list of targets is available below:MYC GABARAPL2 RPL24 RPL27 PRR13 HIF1A EIF1 TUBA1A ANXA2 PGAM1 PSMB6 RPS15A PSMB3 DHRS3 SAT1 ZFP36 PGD NHP2 RAP1B UQCRQ SLC25A3 HSP90AB1 PTP4A1 EIF4H ACTB RPS10 ECH1 TAGLN2 TRIB1 PCBP1 RPS26 RPS21 …
30	TP53	0.0004523	0	0	" title="Overlapping EnrichrTargets" data-content="TP53 targets 21 genes from the input gene list.Associations were determined from the following experiment:The full list of targets is available below:SERPINE2 RPS19 DDIT4 EPHA2 GADD45A PLK2 FOSL1 BTG2 CDKN1A RPS27L GDF15 LAPTM5 AXL ALDH3A1 TNFRSF10B TNFAIP8 FHL2 TRIAP1 PTP4A1 RRM2 VIM" style="cursor: pointer; text-decoration: underline dotted;">2…
31	GABPA	0.0004826	0	0	" title="Overlapping EnrichrTargets" data-content="GABPA targets 84 genes from the input gene list.Associations were determined from the following experiment:The full list of targets is available below:ATF4 SHC1 UQCRH ARPC2 UQCRQ NACA NOP10 EIF3I EIF3H SNRPD2 TRIB3 COX7C COX5B TCEB1 COX6A1 SRP14 EEF1B2 NARS COX6B1 TSG101 COX14 SLIRP PHB2 NUTF2 NSA2 CFL1 RAB5C SEC11A RPS15 RPS16 RPS19 RPS13 MYL12B…
32	HNF4A	0.0007792	0	0	" title="Overlapping EnrichrTargets" data-content="HNF4A targets 56 genes from the input gene list.Associations were determined from the following experiment:The full list of targets is available below:CLDN7 PSME2 C19ORF33 TIPARP GSTO1 PSMB3 CTGF ATP11A FTL RAP1GAP TNFRSF10B SLC25A5 SLC25A6 OCIAD2 TRIB1 MMADHC APOE SDC1 MRPS24 AHCY NEDD8 CAPG NDUFAB1 EEF1B2 ACOT13 ELF3 SOD2 SERPINE1 JUNB SERPINF1…
33	RFX5	0.0008187	0	0	" title="Overlapping EnrichrTargets" data-content="RFX5 targets 30 genes from the input gene list.Associations were determined from the following experiment:The full list of targets is available below:MYC JUNB MYL6 MTHFD2 DDIT4 FDFT1 TUBA1A TSPO CKS2 UCP2 CHP1 NHP2 HMGCS1 PTP4A1 NPC2 PPP1R15A CEBPB DNAJB1 PNRC1 B2M GADD45A LTBP4 UBB COX14 TNFAIP8 YWHAQ YWHAZ VIMP TOB1 SCD" style="cursor: pointer;…
34	NFYB	0.0008355	0	0	" title="Overlapping EnrichrTargets" data-content="NFYB targets 134 genes from the input gene list.Associations were determined from the following experiment:The full list of targets is available below:MTHFD2 DDIT4 TXNIP JUN LGMN FADS1 GAPDH KCNK1 LGALS1 BSG HERPUD1 ACOT13 NDUFB11 CNN2 COX14 EEF1G RRM1 RRM2 FDFT1 FGD6 CFL1 DAD1 DNAJB1 PDK4 SEC61G TMED2 ATP1B3 ATP1B1 UBB DBI LIPA PRKAR1A RPLP0 RPL…
35	RELA	0.0008618	0	0	" title="Overlapping EnrichrTargets" data-content="RELA targets 27 genes from the input gene list.Associations were determined from the following experiment:The full list of targets is available below:RPL5 JUNB IER3 JUN TIPARP PARK7 RPS6 MALAT1 EEF2 ARPC2 HSP90AB1 ITGB8 RPL37A PNRC1 ACTB RPS19 B2M PFN1 TXN PCBP1 HERPUD1 NFKBIA BHLHE40 DBI KLF10 MYH9 MKNK2" style="cursor: pointer; text-decoration:…
36	SPI1	0.001243	0	0	" title="Overlapping EnrichrTargets" data-content="SPI1 targets 64 genes from the input gene list.Associations were determined from the following experiment:The full list of targets is available below:DUSP5 ARPC2 SNRPD2 TALDO1 HERPUD1 PABPC1 COX6A1 EEF1B2 TSG101 CNN2 COX14 PHB2 CFL1 HMGN2 RAB5C POLR2G RPS15 RPS19 RPS13 RPS25 RPS21 RPS3A MYH9 PFDN5 MYL6 PRKAR1A HEXB EMP3 RNASEK PSMB3 UCP2 SLC25A15…
37	SOX2	0.001622	0	0	" title="Overlapping EnrichrTargets" data-content="SOX2 targets 37 genes from the input gene list.Associations were determined from the following experiment:The full list of targets is available below:RNASE4 ATF4 PDGFA FN1 DUSP1 SPP1 CTGF FTL SCGB3A1 HSP90AB1 PPP1R15B KCNK1 ERRFI1 TRIB3 TRIB1 RCN1 VIM RPL3 DKK1 MAP1B FDFT1 H3F3B CSRP1 TM7SF2 ASNS CYR61 CEBPD IFITM1 RPS19 GADD45A ZWINT RPS26 CTNNB…
38	CREB1	0.001734	0	0	" title="Overlapping EnrichrTargets" data-content="CREB1 targets 86 genes from the input gene list.Associations were determined from the following experiment:The full list of targets is available below:DUSP5 DUSP1 UQCRB RAP1B UQCRQ EIF3H EGR1 COX7B PABPC1 TCEB1 EEF1B2 NARS TSG101 COX14 TNFAIP8 EEF1D RRM1 PHB2 LDHA FOSL1 FGD6 PARK7 TXNL4A RAB5C CYR61 HMGCS1 RPL13A TPT1 RPS13 RPS26 RPS27 TMED2 USMG…
39	NFYA	0.002016	0	0	" title="Overlapping EnrichrTargets" data-content="NFYA targets 86 genes from the input gene list.Associations were determined from the following experiment:The full list of targets is available below:MTHFD2 DDIT4 TXNIP ATF4 JUN LGMN FTL SHC1 KCNK1 ACTB LGALS1 SNRPD2 HERPUD1 TCEB1 NARS COX6B1 NDUFB11 COX14 TNFAIP8 RRM2 FDFT1 GRN FGD6 TM7SF2 PGD SNRPF RAB5C HMGCS1 RPL13A SEC11A SEC61G USMG5 COTL1 …
40	ZBTB7A	0.002852	0	0	" title="Overlapping EnrichrTargets" data-content="ZBTB7A targets 83 genes from the input gene list.Associations were determined from the following experiment:The full list of targets is available below:ATF4 DUSP1 GSTO1 FADS1 ATP11A FTL SHC1 EIF3I ACTB LGALS1 TRIB1 APOE EGR1 SDC1 EEF1B2 CNN2 BHLHE40 MKNK2 RRM1 RRM2 MAP1B FOSL1 NRSN2 NUTF2 DHRS3 CLU CEBPB CEBPD POLR2L FTH1 VAT1 RPS21 CSTB XPOT ATP…
41	FOS	0.002901	0	0	" title="Overlapping EnrichrTargets" data-content="FOS targets 31 genes from the input gene list.Associations were determined from the following experiment:The full list of targets is available below:MTHFD2 TXNIP PRR13 ATF4 RPN2 FDFT1 H3F3B RPLP0 EMP3 RNASEK PSMB3 SHC1 RNF181 DHCR7 IARS HMGCS1 TRIB1 ATP5B GADD45A MANF CCT3 CHCHD2 COTL1 HSPA5 YBX1 CKS1B KLF10 MYH9 TOB1 RRM2 VIM" style="cursor: poi…
42	CTCF	0.00327	0	0	" title="Overlapping EnrichrTargets" data-content="CTCF targets 70 genes from the input gene list.Associations were determined from the following experiment:The full list of targets is available below:MTHFD2 DDIT4 SFN JUN TIPARP DUSP1 SPP1 FADS1 NOP10 ACTB TRIB1 EGR1 SDC1 NDUFAB1 COX6A1 COX14 BHLHE40 RND3 ELF3 ALCAM PLK2 GRN FGD6 PARK7 CLU TM7SF2 PIR CYR61 CEBPB CEBPD RAB13 TPT1 RPS15 RPS19 RPS26…
43	RCOR1	0.003593	0	0	" title="Overlapping EnrichrTargets" data-content="RCOR1 targets 33 genes from the input gene list.Associations were determined from the following experiment:The full list of targets is available below:ENO1 IER3 GABARAPL2 DDIT4 TIPARP DUSP1 TKT GRN UCP2 SAT1 TM7SF2 TXNL4A NHP2 ERH SQSTM1 UQCRH HSP90AB1 RNPEP DNAJB1 LGALS1 TRIB1 MYL12B GADD45A RPS26 RPS25 ATP6V0C NDUFAB1 CTNNB1 MRFAP1 HMGA1 CTPS1 …
44	FOSL2	0.004991	0	0	" title="Overlapping EnrichrTargets" data-content="FOSL2 targets 13 genes from the input gene list.Associations were determined from the following experiment:The full list of targets is available below:ENO1 KRT8 RNASE4 TAGLN2 TRIB1 S100A10 GADD45A HEXB EMP3 F3 NME1 SLC20A1 KLF10" style="cursor: pointer; text-decoration: underline dotted;">13 targets
45	ELF1	0.006757	0	0	" title="Overlapping EnrichrTargets" data-content="ELF1 targets 90 genes from the input gene list.Associations were determined from the following experiment:The full list of targets is available below:GSTO1 SHC1 NOP10 TMBIM4 EIF3I EIF3H COX7C PABPC1 COX5B EEF1B2 NARS TSG101 COX14 SLIRP PHB2 FDFT1 ARPC1A NSA2 CFL1 RAB5C RPL13A SEC11A RPS15 RPS16 RPS19 RPS10 RPS12 MYL12B RPS26 RPS25 RPS27 SEC61G TM…
46	NANOG	0.00696	0	0	" title="Overlapping EnrichrTargets" data-content="NANOG targets 28 genes from the input gene list.Associations were determined from the following experiment:The full list of targets is available below:ENO1 DKK1 PRR13 PDGFA HEXB FGFBP1 CKS2 SPP1 DHRS3 CTGF TMSB10 ASNS SCGB3A1 CYR61 PPP1R15B IFITM1 RPS21 SEC61G CST3 TCEB1 NQO1 UBB NFKBIA CKS1B RCN1 MYH9 SCD VIM" style="cursor: pointer; text-decora…
47	SALL4	0.007281	0	0	" title="Overlapping EnrichrTargets" data-content="SALL4 targets 19 genes from the input gene list.Associations were determined from the following experiment:The full list of targets is available below:RPL23 SDC4 HMOX1 PRSS23 F3 SLC20A1 CST3 DHRS3 CTGF FADS2 UBB ASNS NFKBIA SCGB3A1 CYR61 PTP4A1 RCN1 CEBPB VIM" style="cursor: pointer; text-decoration: underline dotted;">19 targets
48	YY1	0.007582	0	0	" title="Overlapping EnrichrTargets" data-content="YY1 targets 98 genes from the input gene list.Associations were determined from the following experiment:The full list of targets is available below:ATF4 UQCRB UQCRH NACA TMBIM4 GAPDH EIF4H EIF3H ECH1 COX7B COX7C HERPUD1 MRPS24 NDUFAB1 COX6A1 EEF1B2 NARS ACOT13 NDUFB11 EEF1G RRM1 SLIRP PHB2 NUTF2 RPS15A FGD6 HMGN2 SNRPF RPL13A CEBPB RPS15 FTH1 RP…
49	GATA1	0.008954	0	0	" title="Overlapping EnrichrTargets" data-content="GATA1 targets 35 genes from the input gene list.Associations were determined from the following experiment:The full list of targets is available below:LIPA DDIT4 RAP1GAP PPP1R15A KCNK1 ERRFI1 ACTB BSG EPHA2 COX7C CTSB SCARB1 TNFAIP8 YWHAZ ELF3 BLVRB JUNB BTG2 LAPTM5 ZFP36 CDH1 HMGN2 MITF LBH GPX1 DAD1 ABLIM1 FTH1 GADD45A HINT1 SLC20A1 GDF15 ATP1B…
50	IRF1	0.009673	0	0	" title="Overlapping EnrichrTargets" data-content="IRF1 targets 15 genes from the input gene list.Associations were determined from the following experiment:The full list of targets is available below:MT2A B2M RPS12 PSME1 PSME2 JUN COX7B NME1 TCEB1 TMSB10 ACOT13 SHC1 MEA1 CKS1B MX1" style="cursor: pointer; text-decoration: underline dotted;">15 targets
51	USF2	0.01076	0	0	" title="Overlapping EnrichrTargets" data-content="USF2 targets 40 genes from the input gene list.Associations were determined from the following experiment:The full list of targets is available below:ATF4 EIF1 DUSP1 RNASEK PSMB3 EEF2 ATRAID GAPDH BSG PCBP1 HERPUD1 CTSD CTSB NPM1 TMED10 BHLHE40 RPL23 HIF1A LDHA HMOX1 PLIN2 GRN RPL19 CFL1 HMGN2 PSAP MAFG RNF181 GPX1 RPL13A VAT1 NME1 ATP6V0C CSTB S…
52	GATA2	0.01327	0	0	" title="Overlapping EnrichrTargets" data-content="GATA2 targets 33 genes from the input gene list.Associations were determined from the following experiment:The full list of targets is available below:LIPA DDIT4 TXNIP JUN DUSP5 F3 FADS2 FHL2 PPP1R15A ERRFI1 TRIB1 EPHA2 HDGF TNFAIP8 SERPINE1 IER2 S100A11 BTG2 CDKN1A LAPTM5 DHRS3 HMGN2 MITF PSAP GPX1 CEBPB GADD45A HINT1 SLC20A1 COTL1 ATP1B3 ATP1B1…
53	HDAC2	0.01338	0	0	" title="Overlapping EnrichrTargets" data-content="HDAC2 targets 11 genes from the input gene list.Associations were determined from the following experiment:The full list of targets is available below:RPS19 ARHGDIA DDIT4 TRIB1 TIPARP SQLE HINT1 ANXA5 AHCY NQO1 DHRS3" style="cursor: pointer; text-decoration: underline dotted;">11 targets
54	ETS1	0.01592	0	0	" title="Overlapping EnrichrTargets" data-content="ETS1 targets 10 genes from the input gene list.Associations were determined from the following experiment:The full list of targets is available below:RPL35 JUNB IER3 FTL UBB HSP90AB1 MEA1 RPS3A CKS2 RPL23A" style="cursor: pointer; text-decoration: underline dotted;">10 targets
55	FLI1	0.01976	0	0	" title="Overlapping EnrichrTargets" data-content="FLI1 targets 28 genes from the input gene list.Associations were determined from the following experiment:The full list of targets is available below:PHB2 PSMD8 RPL38 IER2 RPL27 PRDX5 LDHA EMP3 NSA2 RNASEK RPS3 LAPTM5 CFL1 RPS6 UQCRH ARPC2 EIF3I RPS19 RPS18 RPS13 RRAGA RPS27 RPS21 SEC61G NME1 COX5B CHCHD2 COX7A2" style="cursor: pointer; text-deco…
56	USF1	0.02369	0	0	" title="Overlapping EnrichrTargets" data-content="USF1 targets 53 genes from the input gene list.Associations were determined from the following experiment:The full list of targets is available below:PRKAR1A ATF4 DUSP1 RNASEK PSMB3 LAPTM4B S100A6 EEF2 NOP10 GAPDH SLC25A6 EIF4H BSG PCBP1 HERPUD1 CTSD CTSB AKR1A1 CD63 NPM1 TMED10 BHLHE40 EEF1D NDUFS6 ENO1 FDXR RPL23 UBA52 HIF1A LDHA HMOX1 PRDX6 CL…
57	TCF7L2	0.02792	0	0	" title="Overlapping EnrichrTargets" data-content="TCF7L2 targets 25 genes from the input gene list.Associations were determined from the following experiment:The full list of targets is available below:PSMD8 DKK1 PRDX5 S100A10 FDFT1 EIF1 HEXB NSA2 PSMB7 FTL SHC1 DSP ACTB SNRPD2 RRAGA TAGLN2 PCBP1 ZWINT RPS27 NOG ATP1B3 ATP1B1 NDUFB11 CKS1B EEF1D" style="cursor: pointer; text-decoration: underlin…
58	PBX3	0.03489	0	0	" title="Overlapping EnrichrTargets" data-content="PBX3 targets 47 genes from the input gene list.Associations were determined from the following experiment:The full list of targets is available below:MYL6 MTHFD2 ATF4 EIF1 RPLP0 PSMB3 FTL NACA HSP90AB1 GAPDH PPP1R15A PPP1R15B ACTB TAGLN2 ATP5B CCT3 CD63 COX6B1 MEA1 YWHAQ YWHAZ RPL4 ENO1 JUNB IER3 PRR13 RPN2 HIF1A H3F3B PGD MALAT1 RAB5C DHCR7 HMGC…
59	ESR1	0.03513	0	0	" title="Overlapping EnrichrTargets" data-content="ESR1 targets 9 genes from the input gene list.Associations were determined from the following experiment:The full list of targets is available below:SCARB1 ACTB PDK4 CYP1B1 UBB FHL2 CTSD NFIL3 GDF15" style="cursor: pointer; text-decoration: underline dotted;">9 targets
60	TP63	0.05028	0	0	" title="Overlapping EnrichrTargets" data-content="TP63 targets 50 genes from the input gene list.Associations were determined from the following experiment:The full list of targets is available below:SFN C19ORF33 TIPARP F3 FABP5 LAPTM4B PFKFB3 TACSTD2 DSP FOXJ1 OCIAD2 ERRFI1 SLAMF7 EGR1 SDC1 AKR1B1 HERPUD1 NDRG1 CNN2 EEF1G ELF3 LAMB3 ENO1 ALCAM FDXR CYP1B1 IER3 SERPINF1 FOSL1 CDKN1A ANXA1 ANXA2 …
61	BCL3	0.05104	0	0	" title="Overlapping EnrichrTargets" data-content="BCL3 targets 13 genes from the input gene list.Associations were determined from the following experiment:The full list of targets is available below:ACTB ALCAM IER3 PFN1 RPLP0 TM7SF2 RPS6 CYBA ALDH3A1 MALAT1 UBB NFKBIA BHLHE40" style="cursor: pointer; text-decoration: underline dotted;">13 targets
62	ERG	0.05719	0	0	" title="Overlapping EnrichrTargets" data-content="ERG targets 8 genes from the input gene list.Associations were determined from the following experiment:The full list of targets is available below:RPL22 UQCRC1 S100A4 NDRG1 MRPL33 TKT SOD1 CTNNB1" style="cursor: pointer; text-decoration: underline dotted;">8 targets
63	IRF8	0.06157	0	0	" title="Overlapping EnrichrTargets" data-content="IRF8 targets 7 genes from the input gene list.Associations were determined from the following experiment:The full list of targets is available below:RNASE4 HLA-A PSME2 HSP90AB1 CD53 UCP2 BCAP31" style="cursor: pointer; text-decoration: underline dotted;">7 targets
64	EGR1	0.06833	0	0	" title="Overlapping EnrichrTargets" data-content="EGR1 targets 14 genes from the input gene list.Associations were determined from the following experiment:The full list of targets is available below:S100A13 SLAMF7 EGR1 JUN CLIC1 CSTB HSPA1A ZFP36 CDH1 MYADM DYNLT1 SLC25A5 SOD1 TPT1" style="cursor: pointer; text-decoration: underline dotted;">14 targets
65	BHLHE40	0.07394	0	0	" title="Overlapping EnrichrTargets" data-content="BHLHE40 targets 15 genes from the input gene list.Associations were determined from the following experiment:The full list of targets is available below:ENO1 BSG PFN1 HIF1A ANXA4 PLIN2 BCAP31 ARHGDIA HMGN2 FTL PSAP BHLHE40 YWHAQ KLF10 SLC25A5" style="cursor: pointer; text-decoration: underline dotted;">15 targets
66	SP2	0.07638	0	0	" title="Overlapping EnrichrTargets" data-content="SP2 targets 36 genes from the input gene list.Associations were determined from the following experiment:The full list of targets is available below:EIF1 RPLP0 RPS27L PSMB7 PSMB3 SHC1 SLC25A3 ATP5B CCT3 NDUFAB1 COX6B1 OST4 YWHAQ ENO1 PRR13 RPN2 GRN RPL11 FGD6 PGD RAB5C SHFM1 HMGCS1 RPL37A RPL36A MANF PDIA6 COX7A2 HSPA5 YBX1 ATP5G2 CKS1B CTPS1 RPS…
67	YY1	0.09353	0	0	" title="Overlapping EnrichrTargets" data-content="YY1 targets 14 genes from the input gene list.Associations were determined from the following experiment:The full list of targets is available below:RPL4 ECH1 UQCRC1 UBA52 RPS27 CHCHD2 TMED10 UQCRB UBB NACA RPL13A YWHAZ RRM1 SLIRP" style="cursor: pointer; text-decoration: underline dotted;">14 targets
68	SMC3	0.09919	0	0	" title="Overlapping EnrichrTargets" data-content="SMC3 targets 41 genes from the input gene list.Associations were determined from the following experiment:The full list of targets is available below:DDIT4 UQCRC1 JUN TIPARP DUSP1 RABAC1 SAT1 EEF2 NOP10 KDELR1 TRIB1 EGR1 NFIL3 COX6A1 COX14 NDUFV2 BHLHE40 RND3 ELF3 BLVRB MYC RPL38 PLK2 GRN RPL11 FGD6 DHRS3 CLU TM7SF2 CEBPB CEBPD RAB13 RRAGA GADD45…
69	FOXA2	0.1179	0	0	" title="Overlapping EnrichrTargets" data-content="FOXA2 targets 13 genes from the input gene list.Associations were determined from the following experiment:The full list of targets is available below:ERRFI1 SERPINE1 MT2A JUNB KRT8 TM4SF1 TRIB1 HERPUD1 DUSP1 AHCY DHRS3 MYADM PPP1R15A" style="cursor: pointer; text-decoration: underline dotted;">13 targets
70	TCF3	0.1183	0	0	" title="Overlapping EnrichrTargets" data-content="TCF3 targets 35 genes from the input gene list.Associations were determined from the following experiment:The full list of targets is available below:DDIT4 PDGFA FN1 EIF1 HEXB DUSP1 GPRC5A SPP1 CTGF FTL RAP1B SCGB3A1 SLPI AHCY BHLHE40 GCLM YWHAZ RCN1 NDUFS6 VIM ENO1 MYC RPL21 DKK1 CSRP1 PLIN2 CDH1 RPS8 ASNS IFITM1 RPS19 RPS26 CST3 NFKBIA HSPB1" s…
71	IRF3	0.1301	0	0	" title="Overlapping EnrichrTargets" data-content="IRF3 targets 24 genes from the input gene list.Associations were determined from the following experiment:The full list of targets is available below:FDXR MTHFD2 RPN2 FDFT1 H3F3B RPLP0 PSMB3 PGD SHC1 RNF181 IARS HMGCS1 SNRPD2 ATP5B MANF CHCHD2 COX6B1 HSPA5 YBX1 CKS1B CTPS1 EEF1D MYH9 RRM2" style="cursor: pointer; text-decoration: underline dotted…
72	STAT5A	0.1301	0	0	" title="Overlapping EnrichrTargets" data-content="STAT5A targets 10 genes from the input gene list.Associations were determined from the following experiment:The full list of targets is available below:FTH1 COX7A2L DDIT4 TXN EGR1 GADD45A CHCHD2 PGD BLVRB PPP1R15A" style="cursor: pointer; text-decoration: underline dotted;">10 targets
73	ZKSCAN1	0.1312	0	0	" title="Overlapping EnrichrTargets" data-content="ZKSCAN1 targets 6 genes from the input gene list.Associations were determined from the following experiment:The full list of targets is available below:PSME1 ANXA2 ALDOA TKT CDK2AP1 OCIAD2" style="cursor: pointer; text-decoration: underline dotted;">6 targets
74	TRIM28	0.1312	0	0	" title="Overlapping EnrichrTargets" data-content="TRIM28 targets 6 genes from the input gene list.Associations were determined from the following experiment:The full list of targets is available below:HSPA5 GADD45A TIPARP HSP90AB1 DUSP1 PPP1R15A" style="cursor: pointer; text-decoration: underline dotted;">6 targets
75	STAT3	0.1349	0	0	" title="Overlapping EnrichrTargets" data-content="STAT3 targets 8 genes from the input gene list.Associations were determined from the following experiment:The full list of targets is available below:ZFP36 MYC GFPT2 ASNS EIF1 YWHAZ PABPC1 ABLIM1" style="cursor: pointer; text-decoration: underline dotted;">8 targets
76	TRIM28	0.1466	0	0	" title="Overlapping EnrichrTargets" data-content="TRIM28 targets 9 genes from the input gene list.Associations were determined from the following experiment:The full list of targets is available below:HIF1A EGR1 JUN TKT HSPA1A HSPB1 TXNRD1 SOD1 KCNK1" style="cursor: pointer; text-decoration: underline dotted;">9 targets
77	BCLAF1	0.1702	0	0	" title="Overlapping EnrichrTargets" data-content="BCLAF1 targets 29 genes from the input gene list.Associations were determined from the following experiment:The full list of targets is available below:JUN EIF1 PSMB7 SAT1 FTL HSP90AB1 EGR1 BANF1 HMGA1 BHLHE40 GCLM PHB2 JUNB PRDX1 NUTF2 NSA2 RPL11 CHP1 RPS8 RPL36A RPS19 RPS13 RPS12 GADD45A SNHG6 RPS25 NME1 CTNNB1 RPS3A" style="cursor: pointer; te…
78	EGR1	0.1874	0	0	" title="Overlapping EnrichrTargets" data-content="EGR1 targets 19 genes from the input gene list.Associations were determined from the following experiment:The full list of targets is available below:IER2 IER3 TUBA1A ANXA5 HMGN2 PGD MALAT1 PTP4A1 SLC25A5 TPT1 USMG5 NME1 PABPC1 CD63 COX5B PDIA6 HSPB1 KLF10 RPS3A" style="cursor: pointer; text-decoration: underline dotted;">19 targets
79	FOXP2	0.2428	0	0	" title="Overlapping EnrichrTargets" data-content="FOXP2 targets 7 genes from the input gene list.Associations were determined from the following experiment:The full list of targets is available below:JUNB IER2 RPL27 TRIB1 NDRG1 PABPC1 POLR2L" style="cursor: pointer; text-decoration: underline dotted;">7 targets
80	POU5F1	0.319	0	0	" title="Overlapping EnrichrTargets" data-content="POU5F1 targets 9 genes from the input gene list.Associations were determined from the following experiment:The full list of targets is available below:IFITM1 ENO1 DKK1 PDGFA HEXB EEF1B2 CDH1 UBB SCD" style="cursor: pointer; text-decoration: underline dotted;">9 targets
81	ZBTB33	0.3335	0	0	" title="Overlapping EnrichrTargets" data-content="ZBTB33 targets 22 genes from the input gene list.Associations were determined from the following experiment:The full list of targets is available below:RPL4 RPL23 RPL24 ATF4 PRDX1 HSBP1 RPL12 RPS15A RPL17 RPS6 ERH PPP1R15A RPL23A RPS15 RPS19 RRAGA COX7B TMED2 NPM1 BANF1 RPS3A EEF1G" style="cursor: pointer; text-decoration: underline dotted;">22 t…
82	NRF1	0.3459	0	0	" title="Overlapping EnrichrTargets" data-content="NRF1 targets 56 genes from the input gene list.Associations were determined from the following experiment:The full list of targets is available below:TIPARP FADS1 UQCRB SHC1 ARPC2 BSG PTPLAD1 COX6A1 ACOT13 EEF1G EEF1D MKNK2 LDHA ARPC1A PARK7 RPL13A DAD1 RPS16 RPS12 RPS21 SEC61G NDUFA12 ARHGDIA ATP5G2 UQCRC1 EIF1 PGAM1 CKS2 EEF2 MMADHC C14ORF2 CCT…
83	FOXA1	0.3594	0	0	" title="Overlapping EnrichrTargets" data-content="FOXA1 targets 7 genes from the input gene list.Associations were determined from the following experiment:The full list of targets is available below:KRT8 TRIB1 SH3RF1 HERPUD1 DHRS3 PPP1R15A POLR2L" style="cursor: pointer; text-decoration: underline dotted;">7 targets
84	SIX5	0.3638	0	0	" title="Overlapping EnrichrTargets" data-content="SIX5 targets 33 genes from the input gene list.Associations were determined from the following experiment:The full list of targets is available below:LTA4H RPLP2 PSMB6 RABAC1 FTL UQCRH RPL23A ECH1 COX7B COX7C CCT3 PABPC1 NEDD8 TCEB1 TMED10 MEA1 RRM1 RPL32 RPL8 PHB2 UBA52 HSBP1 NUTF2 RPL12 FGD6 RPS3 CFL1 MITF RAB5C RPS13 C10ORF32 RPS26 XPOT" style…
85	SMAD4	0.3807	0	0	" title="Overlapping EnrichrTargets" data-content="SMAD4 targets 18 genes from the input gene list.Associations were determined from the following experiment:The full list of targets is available below:ALCAM S100A10 TIPARP BTG2 ANXA4 ANXA5 FGD6 DHRS3 FHL2 CYR61 ABLIM1 GADD45A SH3RF1 NOG SLC20A1 NDRG1 TBCA BHLHE40" style="cursor: pointer; text-decoration: underline dotted;">18 targets
86	RAD21	0.4251	0	0	" title="Overlapping EnrichrTargets" data-content="RAD21 targets 37 genes from the input gene list.Associations were determined from the following experiment:The full list of targets is available below:DDIT4 JUN TIPARP DUSP5 DUSP1 SPP1 RABAC1 SAT1 EEF2 NOP10 SLC25A5 TRIB1 APOE CD14 SDC1 AHCY BHLHE40 RND3 ELF3 BLVRB SOD2 MYC RPL27 PLK2 GRN FGD6 CLU TM7SF2 CEBPB CEBPD RAB13 C1QBP NOG NME1 ISCU ATP5…
87	SP1	0.4302	0	0	" title="Overlapping EnrichrTargets" data-content="SP1 targets 21 genes from the input gene list.Associations were determined from the following experiment:The full list of targets is available below:PSME2 RPN2 FDFT1 H3F3B RPLP0 GRN CHP1 PGD MALAT1 SNRPF IARS RPS19 ATP5B CTNNB1 COTL1 COX6B1 HSPA5 GCLC YBX1 MYH9 TOB1" style="cursor: pointer; text-decoration: underline dotted;">21 targets
88	ZC3H11A	0.4941	0	0	" title="Overlapping EnrichrTargets" data-content="ZC3H11A targets 4 genes from the input gene list.Associations were determined from the following experiment:The full list of targets is available below:CLU MYC ISCU NFIL3" style="cursor: pointer; text-decoration: underline dotted;">4 targets
89	VDR	0.6328	0	0	" title="Overlapping EnrichrTargets" data-content="VDR targets 2 genes from the input gene list.Associations were determined from the following experiment:The full list of targets is available below:PABPC1 NFKBIA" style="cursor: pointer; text-decoration: underline dotted;">2 targets
90	CBX3	0.6664	0	0	" title="Overlapping EnrichrTargets" data-content="CBX3 targets 2 genes from the input gene list.Associations were determined from the following experiment:The full list of targets is available below:CHP1 NOP10" style="cursor: pointer; text-decoration: underline dotted;">2 targets
91	MYOD1	0.6864	0	0	" title="Overlapping EnrichrTargets" data-content="MYOD1 targets 4 genes from the input gene list.Associations were determined from the following experiment:The full list of targets is available below:ATF4 SDC4 HSPB1 KLF10" style="cursor: pointer; text-decoration: underline dotted;">4 targets
92	AR	0.721	0	0	" title="Overlapping EnrichrTargets" data-content="AR targets 28 genes from the input gene list.Associations were determined from the following experiment:The full list of targets is available below:SPARCL1 PSMA1 FABP5 RAP1B TNFRSF10B ITGB8 SLC25A15 EIF3H KCNK1 ERRFI1 LGALS3 C14ORF2 NDRG1 RND3 MAP1B PRDX5 CCL20 DHRS3 CLU CDH1 TXNRD1 ZWINT CEACAM6 XPOT NDUFA12 CXCL1 CTPS1 ALDH1A1" style="cursor: p…
93	UBTF	0.7435	0	0	" title="Overlapping EnrichrTargets" data-content="UBTF targets 42 genes from the input gene list.Associations were determined from the following experiment:The full list of targets is available below:TIPARP DUSP5 DUSP1 UQCRH TRIB1 EGR1 SDC1 SH3RF1 MRPS24 BHLHE40 FGD6 CFL1 HMGN2 RNPEP ALDH9A1 CEBPB CEBPD TPT1 VAT1 TMED2 ATP1B3 YBX3 CDK2AP1 SAT1 PFKFB3 COX4I1 KDELR1 PCBP1 CTSB GCLC GCLM MYC SHFM1 …
94	E2F6	0.7784	0	0	" title="Overlapping EnrichrTargets" data-content="E2F6 targets 85 genes from the input gene list.Associations were determined from the following experiment:The full list of targets is available below:MTHFD2 DUSP1 GSTO1 LAPTM4B FADS1 RAP1B GAPDH BSG ECH1 SDC1 HERPUD1 PTPLAD1 ACOT13 TNFAIP8 RRM1 RRM2 BTG3 FGD6 CEBPD TPT1 RPS13 MATN4 ARHGDIA ATP1B1 DBI RNASE4 PRKAR1A HEXB UCP2 PFKFB3 TNFRSF10B TAGL…
95	ATF3	0.8297	0	0	" title="Overlapping EnrichrTargets" data-content="ATF3 targets 2 genes from the input gene list.Associations were determined from the following experiment:The full list of targets is available below:RPL23 TRIAP1" style="cursor: pointer; text-decoration: underline dotted;">2 targets
96	EZH2	0.8357	0	0	" title="Overlapping EnrichrTargets" data-content="EZH2 targets 7 genes from the input gene list.Associations were determined from the following experiment:The full list of targets is available below:RBP7 H3F3B NOG F3 H1F0 BLVRB SLIRP" style="cursor: pointer; text-decoration: underline dotted;">7 targets
97	E2F4	0.9347	0	0	" title="Overlapping EnrichrTargets" data-content="E2F4 targets 14 genes from the input gene list.Associations were determined from the following experiment:The full list of targets is available below:MYC IER2 EIF1 MRPL51 HMGN2 SHC1 RPS16 BSG ALDOA NPM1 ISCU CKS1B RRM1 RRM2" style="cursor: pointer; text-decoration: underline dotted;">14 targets
98	ZEB1	0.9489	0	0	" title="Overlapping EnrichrTargets" data-content="ZEB1 targets 1 genes from the input gene list.Associations were determined from the following experiment:The full list of targets is available below:DHCR7" style="cursor: pointer; text-decoration: underline dotted;">1 targets
99	REST	0.9824	0	0	" title="Overlapping EnrichrTargets" data-content="REST targets 5 genes from the input gene list.Associations were determined from the following experiment:The full list of targets is available below:GABARAPL2 TMED2 ANXA5 TKT HMGN2" style="cursor: pointer; text-decoration: underline dotted;">5 targets
100	REST	0.9928	0	0	" title="Overlapping EnrichrTargets" data-content="REST targets 23 genes from the input gene list.Associations were determined from the following experiment:The full list of targets is available below:GABARAPL2 RBP7 RABAC1 FADS1 LGALS3 ATP5L NPM1 CYP1B1 RPL38 MAP1B ARPC1A ADM ANXA4 RPS15A CDH2 ASNS DAD1 TXNRD1 HLA-A MANF CTNNB1 SUCNR1 GNB2L1" style="cursor: pointer; text-decoration: underline dot…
101	EZH2	0.9987	0	0	" title="Overlapping EnrichrTargets" data-content="EZH2 targets 1 genes from the input gene list.Associations were determined from the following experiment:The full list of targets is available below:DHRS3" style="cursor: pointer; text-decoration: underline dotted;">1 targets
102	SUZ12	1	0	0	" title="Overlapping EnrichrTargets" data-content="SUZ12 targets 21 genes from the input gene list.Associations were determined from the following experiment:The full list of targets is available below:JUN NFIL3 ALCAM FOSL1 DHRS3 CYR61 LBH HLA-A MATN4 ALDH1A3 TACSTD2 FHL2 CD14 NDRG1 SERPINE2 CYP1B1 DKK1 ADM PRSS23 CDH2 NOG" style="cursor: pointer; text-decoration: underline dotted;">21 targets
KEA
Rank	Protein Kinase	Hypergeometric p-value	Z-score	Combined score	Enriched Substrates
1	MAPK14	5.863e-16	0	0	" title="Overlapping EnrichrSubstrates" data-content="MAPK14 targets 31 genes from the input gene list.The full list of substrates is available below:JUN NELFE YY1 PIM1 MSH2 SP1 RELA HMGA1 TCF3 GSK3B VHL RB1 TRRAP HNRNPU MYC MYB PRKDC HIF1A NCOR1 CDK2 CEBPA CEBPB KLF4 KAT5 SKP2 HIST1H3A TUBB SMAD4 SMAD3 USP37 MAPK1" style="cursor: pointer; text-decoration: underline dotted;">31 substrates
2	CSNK2A1	1.184e-15	0	0	" title="Overlapping EnrichrSubstrates" data-content="CSNK2A1 targets 37 genes from the input gene list.The full list of substrates is available below:SPI1 DAXX CSNK2A1 JUN NELFE SIRT1 PPARG YY1 PIM1 MSH2 MAX RELA VDR HMGA1 TCF3 GSK3B VHL TAF7 RB1 TRRAP MYC MYB PRKDC HIF1A NCOR1 CUL2 CDK8 CDK2 CEBPB HDAC2 KLF4 TUBB SMAD4 SMAD3 USP37 RBL1 MAPK1" style="cursor: pointer; text-decoration: underline d…
3	CDK1	1.891e-13	0	0	" title="Overlapping EnrichrSubstrates" data-content="CDK1 targets 36 genes from the input gene list.The full list of substrates is available below:CSNK2A1 GATA2 JUN NELFE SIRT1 SIRT2 CCNT1 PIM1 MSH2 SP1 RELA HMGA1 TCF3 GSK3B VHL TAF1 RB1 TRRAP HNRNPU MYC MYB PRKDC HIF1A NCOR1 CDK2 CEBPA CEBPB HDAC2 KLF4 KAT5 SKP2 TUBB SMAD4 SMAD3 RBL1 MAPK1" style="cursor: pointer; text-decoration: underline dot…
4	CDK4	2.268e-13	0	0	" title="Overlapping EnrichrSubstrates" data-content="CDK4 targets 15 genes from the input gene list.The full list of substrates is available below:RB1 TRRAP MYC MYB SKP2 MAX SMAD2 JUN SMAD3 SP1 CDK2 TCF3 RBL1 CEBPA CEBPB" style="cursor: pointer; text-decoration: underline dotted;">15 substrates
5	MAPK1	2.16e-12	0	0	" title="Overlapping EnrichrSubstrates" data-content="MAPK1 targets 24 genes from the input gene list.The full list of substrates is available below:RB1 MYC MYB CSNK2A1 HIF1A JUN PPARG PIM1 SP1 CDK2 CEBPA CEBPB KLF4 SKP2 HIST1H3A TUBB RELA SMAD2 SMAD4 SMAD3 HMGA1 TCF3 GSK3B MAPK1" style="cursor: pointer; text-decoration: underline dotted;">24 substrates
6	GSK3B	3.537e-12	0	0	" title="Overlapping EnrichrSubstrates" data-content="GSK3B targets 38 genes from the input gene list.The full list of substrates is available below:GATA2 JUN PPARG MSH2 SP1 RELA TCF3 CARM1 NCOR1 CEBPA CEBPB KAT5 TUBB RBL1 MAPK1 DAXX SIRT1 CCNT1 PIM1 MNT HMGA1 GSK3B VHL TAF3 TAF1 RB1 TRRAP MYC MYB HIF1A CDK8 CDK2 KLF4 SKP2 SMAD2 SMAD4 SMAD3 USP37" style="cursor: pointer; text-decoration: underlin…
7	HIPK2	8.841e-10	0	0	" title="Overlapping EnrichrSubstrates" data-content="HIPK2 targets 12 genes from the input gene list.The full list of substrates is available below:MYC MYB CTBP1 PRKDC HIF1A SMAD2 SMAD3 HMGA1 SIRT1 NCOR1 CEBPB RELA" style="cursor: pointer; text-decoration: underline dotted;">12 substrates
8	CDK2	2.702e-09	0	0	" title="Overlapping EnrichrSubstrates" data-content="CDK2 targets 37 genes from the input gene list.The full list of substrates is available below:JUN MSH2 SP1 TCF3 HNRNPU PRKDC CEBPB HDAC2 KAT5 TUBB RBL1 MAPK1 DAXX NELFE SIRT2 CCNT1 YY1 PIM1 MNT SNIP1 HMGA1 GSK3B VHL TAF4 TAF1 RB1 MYC MYB HIF1A CDK9 CDK8 CDK2 SKP2 SMAD2 SMAD4 SMAD3 USP37" style="cursor: pointer; text-decoration: underline dotte…
9	ERK2	3.05e-09	0	0	" title="Overlapping EnrichrSubstrates" data-content="ERK2 targets 12 genes from the input gene list.The full list of substrates is available below:RB1 MYC MYB SMAD2 JUN SMAD4 SMAD3 SP1 TCF3 PPARG CEBPB RELA" style="cursor: pointer; text-decoration: underline dotted;">12 substrates
10	ERK1	5.207e-09	0	0	" title="Overlapping EnrichrSubstrates" data-content="ERK1 targets 12 genes from the input gene list.The full list of substrates is available below:KAT5 MYC PRKCD HIF1A SMAD2 JUN SMAD4 SMAD3 SP1 TCF3 CEBPB RELA" style="cursor: pointer; text-decoration: underline dotted;">12 substrates
11	DNAPK	1.484e-08	0	0	" title="Overlapping EnrichrSubstrates" data-content="DNAPK targets 10 genes from the input gene list.The full list of substrates is available below:TRRAP KAT5 PRKCD PRKDC SMAD2 JUN SMAD4 SP1 TCF3 RELA" style="cursor: pointer; text-decoration: underline dotted;">10 substrates
12	AKT1	1.665e-08	0	0	" title="Overlapping EnrichrSubstrates" data-content="AKT1 targets 15 genes from the input gene list.The full list of substrates is available below:TRRAP MYC CSNK2A1 GATA2 HIST1H3A JUN NCOR1 GTF2F1 SMAD4 SMAD3 SP1 CDK2 TCF3 GSK3B MAPK1" style="cursor: pointer; text-decoration: underline dotted;">15 substrates
13	JNK2	2.833e-07	0	0	" title="Overlapping EnrichrSubstrates" data-content="JNK2 targets 6 genes from the input gene list.The full list of substrates is available below:RB1 PRKDC RELA MYC SMAD2 JUN" style="cursor: pointer; text-decoration: underline dotted;">6 substrates
14	CK2ALPHA	2.875e-07	0	0	" title="Overlapping EnrichrSubstrates" data-content="CK2ALPHA targets 12 genes from the input gene list.The full list of substrates is available below:RB1 SPI1 MYC MYB JUN RELA YY1 MAX VDR SP1 HDAC2 TAF1" style="cursor: pointer; text-decoration: underline dotted;">12 substrates
15	ATM	3.712e-07	0	0	" title="Overlapping EnrichrSubstrates" data-content="ATM targets 12 genes from the input gene list.The full list of substrates is available below:RB1 SMARCB1 HNRNPU KAT5 DAXX PRKDC HIF1A MSH2 SP1 CDK2 RBL1 VHL" style="cursor: pointer; text-decoration: underline dotted;">12 substrates
16	JNK1	4.881e-07	0	0	" title="Overlapping EnrichrSubstrates" data-content="JNK1 targets 8 genes from the input gene list.The full list of substrates is available below:MYC SIRT1 HIF1A RELA SMAD2 JUN SMAD3 SP1" style="cursor: pointer; text-decoration: underline dotted;">8 substrates
17	MAPK3	6.026e-07	0	0	" title="Overlapping EnrichrSubstrates" data-content="MAPK3 targets 13 genes from the input gene list.The full list of substrates is available below:MYC MYB JUN PPARG SMAD2 SMAD4 SMAD3 SP1 CDK2 GSK3B CEBPA CEBPB KLF4" style="cursor: pointer; text-decoration: underline dotted;">13 substrates
18	CK2	1.211e-06	0	0	" title="Overlapping EnrichrSubstrates" data-content="CK2 targets 7 genes from the input gene list.The full list of substrates is available below:SPI1 MYB HDAC2 MAX RELA JUN VDR" style="cursor: pointer; text-decoration: underline dotted;">7 substrates
19	MAPK8	1.582e-06	0	0	" title="Overlapping EnrichrSubstrates" data-content="MAPK8 targets 11 genes from the input gene list.The full list of substrates is available below:MYC MYB CTBP1 JUN TUBB SIRT1 PPARG HMGA1 SP1 MAPK1 KLF4" style="cursor: pointer; text-decoration: underline dotted;">11 substrates
20	ABL1	6.014e-06	0	0	" title="Overlapping EnrichrSubstrates" data-content="ABL1 targets 9 genes from the input gene list.The full list of substrates is available below:RB1 SPI1 KAT5 MYC PRKCD JUN DDB1 CEBPB HDAC2" style="cursor: pointer; text-decoration: underline dotted;">9 substrates
21	CDK9	9.938e-06	0	0	" title="Overlapping EnrichrSubstrates" data-content="CDK9 targets 5 genes from the input gene list.The full list of substrates is available below:RB1 CCNT1 SMAD3 CDK9 PPARG" style="cursor: pointer; text-decoration: underline dotted;">5 substrates
22	RPS6KA3	1.255e-05	0	0	" title="Overlapping EnrichrSubstrates" data-content="RPS6KA3 targets 11 genes from the input gene list.The full list of substrates is available below:TRRAP MYC MYB PRKDC HIST1H3A JUN TUBB KAT2B SMAD3 HMGA1 GSK3B" style="cursor: pointer; text-decoration: underline dotted;">11 substrates
23	PRKCA	3.994e-05	0	0	" title="Overlapping EnrichrSubstrates" data-content="PRKCA targets 19 genes from the input gene list.The full list of substrates is available below:SPI1 JUN PIM1 RELA MNT VDR HMGA1 GSK3B RB1 MYC MYB NCOR1 CDK9 CEBPB KLF4 HIST1H3A TUBB SMAD3 MAPK1" style="cursor: pointer; text-decoration: underline dotted;">19 substrates
24	CDC2	6.379e-05	0	0	" title="Overlapping EnrichrSubstrates" data-content="CDC2 targets 10 genes from the input gene list.The full list of substrates is available below:RB1 KAT5 MYC SKP2 CSNK2A1 PRKDC JUN NCOR1 RELA RBL1" style="cursor: pointer; text-decoration: underline dotted;">10 substrates
25	SRC	0.0002244	0	0	" title="Overlapping EnrichrSubstrates" data-content="SRC targets 12 genes from the input gene list.The full list of substrates is available below:RB1 SPI1 MYC MYB PRKCD JUN PPARG CEBPB KLF4 TUBB SMAD3 MAPK1" style="cursor: pointer; text-decoration: underline dotted;">12 substrates
26	PRKDC	0.0002276	0	0	" title="Overlapping EnrichrSubstrates" data-content="PRKDC targets 6 genes from the input gene list.The full list of substrates is available below:TRRAP HNRNPU MYC SKP2 PRKDC RELA" style="cursor: pointer; text-decoration: underline dotted;">6 substrates
27	PKBALPHA	0.0002522	0	0	" title="Overlapping EnrichrSubstrates" data-content="PKBALPHA targets 8 genes from the input gene list.The full list of substrates is available below:MYC SKP2 CTBP1 PRKDC RELA SMAD2 SMAD3 GSK3B" style="cursor: pointer; text-decoration: underline dotted;">8 substrates
28	CSNK2A2	0.0007801	0	0	" title="Overlapping EnrichrSubstrates" data-content="CSNK2A2 targets 6 genes from the input gene list.The full list of substrates is available below:TRRAP MYC JUN CDK2 NELFE TUBB" style="cursor: pointer; text-decoration: underline dotted;">6 substrates
29	PIM1	0.0008697	0	0	" title="Overlapping EnrichrSubstrates" data-content="PIM1 targets 4 genes from the input gene list.The full list of substrates is available below:MYC SKP2 RELA HIST1H3A" style="cursor: pointer; text-decoration: underline dotted;">4 substrates
30	PRKCD	0.0008987	0	0	" title="Overlapping EnrichrSubstrates" data-content="PRKCD targets 6 genes from the input gene list.The full list of substrates is available below:PRKCD PRKDC HIST1H3A JUN GSK3B MAPK1" style="cursor: pointer; text-decoration: underline dotted;">6 substrates
31	MELK	0.001448	0	0	" title="Overlapping EnrichrSubstrates" data-content="MELK targets 3 genes from the input gene list.The full list of substrates is available below:SMAD2 SMAD4 SMAD3" style="cursor: pointer; text-decoration: underline dotted;">3 substrates
32	CK2A2	0.001508	0	0	" title="Overlapping EnrichrSubstrates" data-content="CK2A2 targets 4 genes from the input gene list.The full list of substrates is available below:MYC HDAC2 RELA JUN" style="cursor: pointer; text-decoration: underline dotted;">4 substrates
33	GSK	0.001595	0	0	" title="Overlapping EnrichrSubstrates" data-content="GSK targets 3 genes from the input gene list.The full list of substrates is available below:CEBPB RELA MYC" style="cursor: pointer; text-decoration: underline dotted;">3 substrates
34	PRKACA	0.001777	0	0	" title="Overlapping EnrichrSubstrates" data-content="PRKACA targets 17 genes from the input gene list.The full list of substrates is available below:SPI1 JUN DDB1 RELA VDR GSK3B RB1 MYC MYB HIF1A NCOR1 CEBPB KLF4 TUBB SMAD4 SMAD3 MAPK1" style="cursor: pointer; text-decoration: underline dotted;">17 substrates
35	CDK3	0.00209	0	0	" title="Overlapping EnrichrSubstrates" data-content="CDK3 targets 3 genes from the input gene list.The full list of substrates is available below:RB1 JUN CDK2" style="cursor: pointer; text-decoration: underline dotted;">3 substrates
36	DNA	0.002439	0	0	" title="Overlapping EnrichrSubstrates" data-content="DNA targets 2 genes from the input gene list.The full list of substrates is available below:JUN PRKDC" style="cursor: pointer; text-decoration: underline dotted;">2 substrates
37	MAP2K1	0.002538	0	0	" title="Overlapping EnrichrSubstrates" data-content="MAP2K1 targets 4 genes from the input gene list.The full list of substrates is available below:GSK3B MYC PPARG MAPK1" style="cursor: pointer; text-decoration: underline dotted;">4 substrates
38	TGFBR2	0.002538	0	0	" title="Overlapping EnrichrSubstrates" data-content="TGFBR2 targets 4 genes from the input gene list.The full list of substrates is available below:MYC SMAD2 SMAD3 SP1" style="cursor: pointer; text-decoration: underline dotted;">4 substrates
39	ATR	0.002639	0	0	" title="Overlapping EnrichrSubstrates" data-content="ATR targets 5 genes from the input gene list.The full list of substrates is available below:DAXX MSH2 PRKDC CDK9 SP1" style="cursor: pointer; text-decoration: underline dotted;">5 substrates
40	CDK7	0.002923	0	0	" title="Overlapping EnrichrSubstrates" data-content="CDK7 targets 4 genes from the input gene list.The full list of substrates is available below:GTF2F1 CDK9 CDK2 TAF3" style="cursor: pointer; text-decoration: underline dotted;">4 substrates
41	PAK2	0.00306	0	0	" title="Overlapping EnrichrSubstrates" data-content="PAK2 targets 4 genes from the input gene list.The full list of substrates is available below:MYC SMAD2 JUN HIST1H4A" style="cursor: pointer; text-decoration: underline dotted;">4 substrates
42	RAF1	0.003548	0	0	" title="Overlapping EnrichrSubstrates" data-content="RAF1 targets 5 genes from the input gene list.The full list of substrates is available below:RB1 MYC MYB PRKCD MAPK1" style="cursor: pointer; text-decoration: underline dotted;">5 substrates
43	RPS6KA1	0.00365	0	0	" title="Overlapping EnrichrSubstrates" data-content="RPS6KA1 targets 4 genes from the input gene list.The full list of substrates is available below:GSK3B CEBPB MAPK1 JUN" style="cursor: pointer; text-decoration: underline dotted;">4 substrates
44	PRKCZ	0.00414	0	0	" title="Overlapping EnrichrSubstrates" data-content="PRKCZ targets 4 genes from the input gene list.The full list of substrates is available below:GSK3B RELA MAPK1 SP1" style="cursor: pointer; text-decoration: underline dotted;">4 substrates
45	CHUK	0.004313	0	0	" title="Overlapping EnrichrSubstrates" data-content="CHUK targets 4 genes from the input gene list.The full list of substrates is available below:MYC TUBB NCOR1 RELA" style="cursor: pointer; text-decoration: underline dotted;">4 substrates
46	GSK3BETA	0.005533	0	0	" title="Overlapping EnrichrSubstrates" data-content="GSK3BETA targets 5 genes from the input gene list.The full list of substrates is available below:MYC JUN SMAD3 GSK3B CEBPB" style="cursor: pointer; text-decoration: underline dotted;">5 substrates
47	ACTR2B	0.006317	0	0	" title="Overlapping EnrichrSubstrates" data-content="ACTR2B targets 2 genes from the input gene list.The full list of substrates is available below:SMAD2 SMAD3" style="cursor: pointer; text-decoration: underline dotted;">2 substrates
48	CHEK1	0.006552	0	0	" title="Overlapping EnrichrSubstrates" data-content="CHEK1 targets 6 genes from the input gene list.The full list of substrates is available below:RB1 MYC SKP2 HIST1H3A NELFE TUBB" style="cursor: pointer; text-decoration: underline dotted;">6 substrates
49	MAP2K3	0.006639	0	0	" title="Overlapping EnrichrSubstrates" data-content="MAP2K3 targets 3 genes from the input gene list.The full list of substrates is available below:SMAD2 SMAD4 SMAD3" style="cursor: pointer; text-decoration: underline dotted;">3 substrates
50	AURKB	0.006864	0	0	" title="Overlapping EnrichrSubstrates" data-content="AURKB targets 5 genes from the input gene list.The full list of substrates is available below:RB1 YY1 PRKDC HIST1H3A NELFE" style="cursor: pointer; text-decoration: underline dotted;">5 substrates
51	MAP3K7	0.007268	0	0	" title="Overlapping EnrichrSubstrates" data-content="MAP3K7 targets 4 genes from the input gene list.The full list of substrates is available below:HNRNPU SMAD3 HIST1H4A TUBB" style="cursor: pointer; text-decoration: underline dotted;">4 substrates
52	GSK3A	0.007389	0	0	" title="Overlapping EnrichrSubstrates" data-content="GSK3A targets 3 genes from the input gene list.The full list of substrates is available below:MYC CEBPA CEBPB" style="cursor: pointer; text-decoration: underline dotted;">3 substrates
53	LYN	0.007416	0	0	" title="Overlapping EnrichrSubstrates" data-content="LYN targets 5 genes from the input gene list.The full list of substrates is available below:SPI1 YY1 MYC CSNK2A1 PRKCD" style="cursor: pointer; text-decoration: underline dotted;">5 substrates
54	GSK3ALPHA	0.007782	0	0	" title="Overlapping EnrichrSubstrates" data-content="GSK3ALPHA targets 3 genes from the input gene list.The full list of substrates is available below:GSK3B MYC JUN" style="cursor: pointer; text-decoration: underline dotted;">3 substrates
55	PKA	0.01181	0	0	" title="Overlapping EnrichrSubstrates" data-content="PKA targets 2 genes from the input gene list.The full list of substrates is available below:GSK3B RELA" style="cursor: pointer; text-decoration: underline dotted;">2 substrates
56	MAP3K4	0.01287	0	0	" title="Overlapping EnrichrSubstrates" data-content="MAP3K4 targets 2 genes from the input gene list.The full list of substrates is available below:TRRAP CARM1" style="cursor: pointer; text-decoration: underline dotted;">2 substrates
57	HIPK1	0.01398	0	0	" title="Overlapping EnrichrSubstrates" data-content="HIPK1 targets 2 genes from the input gene list.The full list of substrates is available below:DAXX MYB" style="cursor: pointer; text-decoration: underline dotted;">2 substrates
58	CDK5	0.01475	0	0	" title="Overlapping EnrichrSubstrates" data-content="CDK5 targets 5 genes from the input gene list.The full list of substrates is available below:RB1 MYC HIF1A GSK3B PPARG" style="cursor: pointer; text-decoration: underline dotted;">5 substrates
59	CDKN1B	0.01508	0	0	" title="Overlapping EnrichrSubstrates" data-content="CDKN1B targets 1 genes from the input gene list.The full list of substrates is available below:CDK2" style="cursor: pointer; text-decoration: underline dotted;">1 substrates
60	TRIM33	0.01508	0	0	" title="Overlapping EnrichrSubstrates" data-content="TRIM33 targets 1 genes from the input gene list.The full list of substrates is available below:SMAD4" style="cursor: pointer; text-decoration: underline dotted;">1 substrates
61	HASPIN	0.01508	0	0	" title="Overlapping EnrichrSubstrates" data-content="HASPIN targets 1 genes from the input gene list.The full list of substrates is available below:HIST1H3A" style="cursor: pointer; text-decoration: underline dotted;">1 substrates
62	PCNA	0.01508	0	0	" title="Overlapping EnrichrSubstrates" data-content="PCNA targets 1 genes from the input gene list.The full list of substrates is available below:CDK2" style="cursor: pointer; text-decoration: underline dotted;">1 substrates
63	TGM2	0.01508	0	0	" title="Overlapping EnrichrSubstrates" data-content="TGM2 targets 1 genes from the input gene list.The full list of substrates is available below:HIST1H3A" style="cursor: pointer; text-decoration: underline dotted;">1 substrates
64	EP400	0.01508	0	0	" title="Overlapping EnrichrSubstrates" data-content="EP400 targets 1 genes from the input gene list.The full list of substrates is available below:TRRAP" style="cursor: pointer; text-decoration: underline dotted;">1 substrates
65	LYK5	0.01508	0	0	" title="Overlapping EnrichrSubstrates" data-content="LYK5 targets 1 genes from the input gene list.The full list of substrates is available below:SMAD4" style="cursor: pointer; text-decoration: underline dotted;">1 substrates
66	PRKCQ	0.01518	0	0	" title="Overlapping EnrichrSubstrates" data-content="PRKCQ targets 3 genes from the input gene list.The full list of substrates is available below:SPI1 SIRT2 HIST1H3A" style="cursor: pointer; text-decoration: underline dotted;">3 substrates
67	EGFR	0.01568	0	0	" title="Overlapping EnrichrSubstrates" data-content="EGFR targets 5 genes from the input gene list.The full list of substrates is available below:PRKCD PRKDC HIST1H3A JUN PPARG" style="cursor: pointer; text-decoration: underline dotted;">5 substrates
68	PBK	0.0163	0	0	" title="Overlapping EnrichrSubstrates" data-content="PBK targets 2 genes from the input gene list.The full list of substrates is available below:HIST1H3A JUN" style="cursor: pointer; text-decoration: underline dotted;">2 substrates
69	RPS6KA4	0.0163	0	0	" title="Overlapping EnrichrSubstrates" data-content="RPS6KA4 targets 2 genes from the input gene list.The full list of substrates is available below:RELA HIST1H3A" style="cursor: pointer; text-decoration: underline dotted;">2 substrates
70	VRK1	0.01877	0	0	" title="Overlapping EnrichrSubstrates" data-content="VRK1 targets 2 genes from the input gene list.The full list of substrates is available below:HIST1H3A JUN" style="cursor: pointer; text-decoration: underline dotted;">2 substrates
71	MOK	0.01877	0	0	" title="Overlapping EnrichrSubstrates" data-content="MOK targets 2 genes from the input gene list.The full list of substrates is available below:MYC JUN" style="cursor: pointer; text-decoration: underline dotted;">2 substrates
72	AKT3	0.0214	0	0	" title="Overlapping EnrichrSubstrates" data-content="AKT3 targets 2 genes from the input gene list.The full list of substrates is available below:GSK3B PRKCD" style="cursor: pointer; text-decoration: underline dotted;">2 substrates
73	PKBGAMMA	0.0214	0	0	" title="Overlapping EnrichrSubstrates" data-content="PKBGAMMA targets 2 genes from the input gene list.The full list of substrates is available below:GSK3B RELA" style="cursor: pointer; text-decoration: underline dotted;">2 substrates
74	CDK8	0.0214	0	0	" title="Overlapping EnrichrSubstrates" data-content="CDK8 targets 2 genes from the input gene list.The full list of substrates is available below:HIST1H3A SMAD3" style="cursor: pointer; text-decoration: underline dotted;">2 substrates
75	GTF2F1	0.02254	0	0	" title="Overlapping EnrichrSubstrates" data-content="GTF2F1 targets 1 genes from the input gene list.The full list of substrates is available below:GTF2F1" style="cursor: pointer; text-decoration: underline dotted;">1 substrates
76	CDK6	0.02276	0	0	" title="Overlapping EnrichrSubstrates" data-content="CDK6 targets 2 genes from the input gene list.The full list of substrates is available below:RB1 CEBPA" style="cursor: pointer; text-decoration: underline dotted;">2 substrates
77	UHMK1	0.02276	0	0	" title="Overlapping EnrichrSubstrates" data-content="UHMK1 targets 2 genes from the input gene list.The full list of substrates is available below:SMAD2 SMAD4" style="cursor: pointer; text-decoration: underline dotted;">2 substrates
78	CAMK2D	0.02416	0	0	" title="Overlapping EnrichrSubstrates" data-content="CAMK2D targets 2 genes from the input gene list.The full list of substrates is available below:GSK3B SMAD4" style="cursor: pointer; text-decoration: underline dotted;">2 substrates
79	PKCEPSILON	0.02549	0	0	" title="Overlapping EnrichrSubstrates" data-content="PKCEPSILON targets 3 genes from the input gene list.The full list of substrates is available below:PRKCD MAPK1 SP1" style="cursor: pointer; text-decoration: underline dotted;">3 substrates
80	AURKA	0.02709	0	0	" title="Overlapping EnrichrSubstrates" data-content="AURKA targets 3 genes from the input gene list.The full list of substrates is available below:GSK3B HIST1H3A VHL" style="cursor: pointer; text-decoration: underline dotted;">3 substrates
81	CK1ALPHA	0.02959	0	0	" title="Overlapping EnrichrSubstrates" data-content="CK1ALPHA targets 3 genes from the input gene list.The full list of substrates is available below:RB1 GSK3B JUN" style="cursor: pointer; text-decoration: underline dotted;">3 substrates
82	MAP3K20	0.02994	0	0	" title="Overlapping EnrichrSubstrates" data-content="MAP3K20 targets 1 genes from the input gene list.The full list of substrates is available below:HIST1H3A" style="cursor: pointer; text-decoration: underline dotted;">1 substrates
83	IKBKB	0.0322	0	0	" title="Overlapping EnrichrSubstrates" data-content="IKBKB targets 3 genes from the input gene list.The full list of substrates is available below:HNRNPU TUBB RELA" style="cursor: pointer; text-decoration: underline dotted;">3 substrates
84	NPM/ALK	0.03729	0	0	" title="Overlapping EnrichrSubstrates" data-content="NPM/ALK targets 1 genes from the input gene list.The full list of substrates is available below:MSH2" style="cursor: pointer; text-decoration: underline dotted;">1 substrates
85	PLK3	0.03826	0	0	" title="Overlapping EnrichrSubstrates" data-content="PLK3 targets 2 genes from the input gene list.The full list of substrates is available below:HIF1A JUN" style="cursor: pointer; text-decoration: underline dotted;">2 substrates
86	DYRK2	0.03826	0	0	" title="Overlapping EnrichrSubstrates" data-content="DYRK2 targets 2 genes from the input gene list.The full list of substrates is available below:MYC JUN" style="cursor: pointer; text-decoration: underline dotted;">2 substrates
87	PDGFRBETA	0.03998	0	0	" title="Overlapping EnrichrSubstrates" data-content="PDGFRBETA targets 2 genes from the input gene list.The full list of substrates is available below:MAX PRKCD" style="cursor: pointer; text-decoration: underline dotted;">2 substrates
88	RPS6KA5	0.04173	0	0	" title="Overlapping EnrichrSubstrates" data-content="RPS6KA5 targets 2 genes from the input gene list.The full list of substrates is available below:RELA HIST1H3A" style="cursor: pointer; text-decoration: underline dotted;">2 substrates
89	IKK	0.04458	0	0	" title="Overlapping EnrichrSubstrates" data-content="IKK targets 1 genes from the input gene list.The full list of substrates is available below:RELA" style="cursor: pointer; text-decoration: underline dotted;">1 substrates
90	NLK	0.04901	0	0	" title="Overlapping EnrichrSubstrates" data-content="NLK targets 2 genes from the input gene list.The full list of substrates is available below:MYB SMAD4" style="cursor: pointer; text-decoration: underline dotted;">2 substrates
91	PRKAA1	0.04923	0	0	" title="Overlapping EnrichrSubstrates" data-content="PRKAA1 targets 3 genes from the input gene list.The full list of substrates is available below:RB1 CTBP1 SIRT2" style="cursor: pointer; text-decoration: underline dotted;">3 substrates
92	NIK	0.05182	0	0	" title="Overlapping EnrichrSubstrates" data-content="NIK targets 1 genes from the input gene list.The full list of substrates is available below:CEBPB" style="cursor: pointer; text-decoration: underline dotted;">1 substrates
93	PKBBETA	0.05281	0	0	" title="Overlapping EnrichrSubstrates" data-content="PKBBETA targets 2 genes from the input gene list.The full list of substrates is available below:GSK3B RELA" style="cursor: pointer; text-decoration: underline dotted;">2 substrates
94	PRKCI	0.05475	0	0	" title="Overlapping EnrichrSubstrates" data-content="PRKCI targets 2 genes from the input gene list.The full list of substrates is available below:DDB1 SP1" style="cursor: pointer; text-decoration: underline dotted;">2 substrates
95	MTOR	0.0561	0	0	" title="Overlapping EnrichrSubstrates" data-content="MTOR targets 3 genes from the input gene list.The full list of substrates is available below:MYC JUN TAF3" style="cursor: pointer; text-decoration: underline dotted;">3 substrates
96	CHEK2	0.05671	0	0	" title="Overlapping EnrichrSubstrates" data-content="CHEK2 targets 2 genes from the input gene list.The full list of substrates is available below:RB1 VHL" style="cursor: pointer; text-decoration: underline dotted;">2 substrates
97	RSK	0.059	0	0	" title="Overlapping EnrichrSubstrates" data-content="RSK targets 1 genes from the input gene list.The full list of substrates is available below:CEBPB" style="cursor: pointer; text-decoration: underline dotted;">1 substrates
98	RSK3	0.059	0	0	" title="Overlapping EnrichrSubstrates" data-content="RSK3 targets 1 genes from the input gene list.The full list of substrates is available below:MAPK1" style="cursor: pointer; text-decoration: underline dotted;">1 substrates
99	PKCTHETA	0.06071	0	0	" title="Overlapping EnrichrSubstrates" data-content="PKCTHETA targets 2 genes from the input gene list.The full list of substrates is available below:PRKCD MAPK1" style="cursor: pointer; text-decoration: underline dotted;">2 substrates
100	JAK2	0.06275	0	0	" title="Overlapping EnrichrSubstrates" data-content="JAK2 targets 2 genes from the input gene list.The full list of substrates is available below:HIST1H3A MAPK1" style="cursor: pointer; text-decoration: underline dotted;">2 substrates
101	PAK1	0.06342	0	0	" title="Overlapping EnrichrSubstrates" data-content="PAK1 targets 3 genes from the input gene list.The full list of substrates is available below:PRKCD CTBP1 HIST1H3A" style="cursor: pointer; text-decoration: underline dotted;">3 substrates
102	MAPK10	0.06899	0	0	" title="Overlapping EnrichrSubstrates" data-content="MAPK10 targets 2 genes from the input gene list.The full list of substrates is available below:MYC JUN" style="cursor: pointer; text-decoration: underline dotted;">2 substrates
103	AKT2	0.07983	0	0	" title="Overlapping EnrichrSubstrates" data-content="AKT2 targets 2 genes from the input gene list.The full list of substrates is available below:GSK3B HIST1H3A" style="cursor: pointer; text-decoration: underline dotted;">2 substrates
104	PKC	0.08023	0	0	" title="Overlapping EnrichrSubstrates" data-content="PKC targets 1 genes from the input gene list.The full list of substrates is available below:RELA" style="cursor: pointer; text-decoration: underline dotted;">1 substrates
105	CAMKIV	0.08023	0	0	" title="Overlapping EnrichrSubstrates" data-content="CAMKIV targets 1 genes from the input gene list.The full list of substrates is available below:RELA" style="cursor: pointer; text-decoration: underline dotted;">1 substrates
106	PKCALPHA	0.08069	0	0	" title="Overlapping EnrichrSubstrates" data-content="PKCALPHA targets 3 genes from the input gene list.The full list of substrates is available below:MYC PRKCD GSK3B" style="cursor: pointer; text-decoration: underline dotted;">3 substrates
107	CSNK1E	0.08206	0	0	" title="Overlapping EnrichrSubstrates" data-content="CSNK1E targets 2 genes from the input gene list.The full list of substrates is available below:MYC TUBB" style="cursor: pointer; text-decoration: underline dotted;">2 substrates
108	PKD1	0.08206	0	0	" title="Overlapping EnrichrSubstrates" data-content="PKD1 targets 2 genes from the input gene list.The full list of substrates is available below:MYB JUN" style="cursor: pointer; text-decoration: underline dotted;">2 substrates
109	JNK3	0.0872	0	0	" title="Overlapping EnrichrSubstrates" data-content="JNK3 targets 1 genes from the input gene list.The full list of substrates is available below:JUN" style="cursor: pointer; text-decoration: underline dotted;">1 substrates
110	MAP3K8	0.09116	0	0	" title="Overlapping EnrichrSubstrates" data-content="MAP3K8 targets 2 genes from the input gene list.The full list of substrates is available below:PIM1 MAPK1" style="cursor: pointer; text-decoration: underline dotted;">2 substrates
111	BRD2	0.09412	0	0	" title="Overlapping EnrichrSubstrates" data-content="BRD2 targets 1 genes from the input gene list.The full list of substrates is available below:RB1" style="cursor: pointer; text-decoration: underline dotted;">1 substrates
112	ADRBK1	0.09412	0	0	" title="Overlapping EnrichrSubstrates" data-content="ADRBK1 targets 1 genes from the input gene list.The full list of substrates is available below:PRKCD" style="cursor: pointer; text-decoration: underline dotted;">1 substrates
113	PDHK1	0.1029	0	0	" title="Overlapping EnrichrSubstrates" data-content="PDHK1 targets 2 genes from the input gene list.The full list of substrates is available below:GSK3B PRKCD" style="cursor: pointer; text-decoration: underline dotted;">2 substrates
114	MAP3K1	0.1076	0	0	" title="Overlapping EnrichrSubstrates" data-content="MAP3K1 targets 3 genes from the input gene list.The full list of substrates is available below:HIST1H4A TUBB DDB1" style="cursor: pointer; text-decoration: underline dotted;">3 substrates
115	TAF1	0.1213	0	0	" title="Overlapping EnrichrSubstrates" data-content="TAF1 targets 1 genes from the input gene list.The full list of substrates is available below:TAF7" style="cursor: pointer; text-decoration: underline dotted;">1 substrates
116	INSR	0.1226	0	0	" title="Overlapping EnrichrSubstrates" data-content="INSR targets 2 genes from the input gene list.The full list of substrates is available below:JUN HMGA1" style="cursor: pointer; text-decoration: underline dotted;">2 substrates
117	TBK1	0.1251	0	0	" title="Overlapping EnrichrSubstrates" data-content="TBK1 targets 2 genes from the input gene list.The full list of substrates is available below:TUBB RELA" style="cursor: pointer; text-decoration: underline dotted;">2 substrates
118	IKBKE	0.1276	0	0	" title="Overlapping EnrichrSubstrates" data-content="IKBKE targets 2 genes from the input gene list.The full list of substrates is available below:TUBB RELA" style="cursor: pointer; text-decoration: underline dotted;">2 substrates
119	CSNK1A1	0.1301	0	0	" title="Overlapping EnrichrSubstrates" data-content="CSNK1A1 targets 2 genes from the input gene list.The full list of substrates is available below:RELA VHL" style="cursor: pointer; text-decoration: underline dotted;">2 substrates
120	AURORAA	0.1327	0	0	" title="Overlapping EnrichrSubstrates" data-content="AURORAA targets 2 genes from the input gene list.The full list of substrates is available below:GSK3B NCOR1" style="cursor: pointer; text-decoration: underline dotted;">2 substrates
121	TAOK1	0.1346	0	0	" title="Overlapping EnrichrSubstrates" data-content="TAOK1 targets 1 genes from the input gene list.The full list of substrates is available below:GSK3B" style="cursor: pointer; text-decoration: underline dotted;">1 substrates
122	SRPK3	0.1346	0	0	" title="Overlapping EnrichrSubstrates" data-content="SRPK3 targets 1 genes from the input gene list.The full list of substrates is available below:SIRT2" style="cursor: pointer; text-decoration: underline dotted;">1 substrates
123	PTK7	0.1346	0	0	" title="Overlapping EnrichrSubstrates" data-content="PTK7 targets 1 genes from the input gene list.The full list of substrates is available below:DDB1" style="cursor: pointer; text-decoration: underline dotted;">1 substrates
124	LCK	0.1357	0	0	" title="Overlapping EnrichrSubstrates" data-content="LCK targets 3 genes from the input gene list.The full list of substrates is available below:SPI1 PRKCD MAPK1" style="cursor: pointer; text-decoration: underline dotted;">3 substrates
125	PDK	0.1411	0	0	" title="Overlapping EnrichrSubstrates" data-content="PDK targets 1 genes from the input gene list.The full list of substrates is available below:PRKCD" style="cursor: pointer; text-decoration: underline dotted;">1 substrates
126	PKCETA	0.1411	0	0	" title="Overlapping EnrichrSubstrates" data-content="PKCETA targets 1 genes from the input gene list.The full list of substrates is available below:PRKCD" style="cursor: pointer; text-decoration: underline dotted;">1 substrates
127	MINK1	0.1411	0	0	" title="Overlapping EnrichrSubstrates" data-content="MINK1 targets 1 genes from the input gene list.The full list of substrates is available below:SMAD2" style="cursor: pointer; text-decoration: underline dotted;">1 substrates
128	MAP4K5	0.1411	0	0	" title="Overlapping EnrichrSubstrates" data-content="MAP4K5 targets 1 genes from the input gene list.The full list of substrates is available below:GSK3B" style="cursor: pointer; text-decoration: underline dotted;">1 substrates
129	CDK20	0.1476	0	0	" title="Overlapping EnrichrSubstrates" data-content="CDK20 targets 1 genes from the input gene list.The full list of substrates is available below:CDK2" style="cursor: pointer; text-decoration: underline dotted;">1 substrates
130	CDK18	0.1476	0	0	" title="Overlapping EnrichrSubstrates" data-content="CDK18 targets 1 genes from the input gene list.The full list of substrates is available below:SIRT2" style="cursor: pointer; text-decoration: underline dotted;">1 substrates
131	DMPK	0.1476	0	0	" title="Overlapping EnrichrSubstrates" data-content="DMPK targets 1 genes from the input gene list.The full list of substrates is available below:SP1" style="cursor: pointer; text-decoration: underline dotted;">1 substrates
132	PKN3	0.1476	0	0	" title="Overlapping EnrichrSubstrates" data-content="PKN3 targets 1 genes from the input gene list.The full list of substrates is available below:GATA2" style="cursor: pointer; text-decoration: underline dotted;">1 substrates
133	MAPK9	0.1509	0	0	" title="Overlapping EnrichrSubstrates" data-content="MAPK9 targets 2 genes from the input gene list.The full list of substrates is available below:MYC JUN" style="cursor: pointer; text-decoration: underline dotted;">2 substrates
134	GSG2	0.1541	0	0	" title="Overlapping EnrichrSubstrates" data-content="GSG2 targets 1 genes from the input gene list.The full list of substrates is available below:HIST1H3A" style="cursor: pointer; text-decoration: underline dotted;">1 substrates
135	SGK2	0.1541	0	0	" title="Overlapping EnrichrSubstrates" data-content="SGK2 targets 1 genes from the input gene list.The full list of substrates is available below:GSK3B" style="cursor: pointer; text-decoration: underline dotted;">1 substrates
136	MAPK15	0.1541	0	0	" title="Overlapping EnrichrSubstrates" data-content="MAPK15 targets 1 genes from the input gene list.The full list of substrates is available below:JUN" style="cursor: pointer; text-decoration: underline dotted;">1 substrates
137	MAP3K10	0.1605	0	0	" title="Overlapping EnrichrSubstrates" data-content="MAP3K10 targets 1 genes from the input gene list.The full list of substrates is available below:TCF3" style="cursor: pointer; text-decoration: underline dotted;">1 substrates
138	TLK1	0.1605	0	0	" title="Overlapping EnrichrSubstrates" data-content="TLK1 targets 1 genes from the input gene list.The full list of substrates is available below:HIST1H3A" style="cursor: pointer; text-decoration: underline dotted;">1 substrates
139	MAPK6	0.1605	0	0	" title="Overlapping EnrichrSubstrates" data-content="MAPK6 targets 1 genes from the input gene list.The full list of substrates is available below:DDB1" style="cursor: pointer; text-decoration: underline dotted;">1 substrates
140	WEE1	0.1605	0	0	" title="Overlapping EnrichrSubstrates" data-content="WEE1 targets 1 genes from the input gene list.The full list of substrates is available below:CDK2" style="cursor: pointer; text-decoration: underline dotted;">1 substrates
141	PLK1	0.1643	0	0	" title="Overlapping EnrichrSubstrates" data-content="PLK1 targets 4 genes from the input gene list.The full list of substrates is available below:HNRNPU MYC CCNT1 YY1" style="cursor: pointer; text-decoration: underline dotted;">4 substrates
142	IKKALPHA	0.1669	0	0	" title="Overlapping EnrichrSubstrates" data-content="IKKALPHA targets 1 genes from the input gene list.The full list of substrates is available below:RELA" style="cursor: pointer; text-decoration: underline dotted;">1 substrates
143	CSNK1G1	0.1669	0	0	" title="Overlapping EnrichrSubstrates" data-content="CSNK1G1 targets 1 genes from the input gene list.The full list of substrates is available below:RELA" style="cursor: pointer; text-decoration: underline dotted;">1 substrates
144	DYRK3	0.1669	0	0	" title="Overlapping EnrichrSubstrates" data-content="DYRK3 targets 1 genes from the input gene list.The full list of substrates is available below:SIRT1" style="cursor: pointer; text-decoration: underline dotted;">1 substrates
145	AURKC	0.1669	0	0	" title="Overlapping EnrichrSubstrates" data-content="AURKC targets 1 genes from the input gene list.The full list of substrates is available below:HIST1H3A" style="cursor: pointer; text-decoration: underline dotted;">1 substrates
146	MAP3K3	0.1717	0	0	" title="Overlapping EnrichrSubstrates" data-content="MAP3K3 targets 3 genes from the input gene list.The full list of substrates is available below:HIST1H4A TUBB DDB1" style="cursor: pointer; text-decoration: underline dotted;">3 substrates
147	PAK5	0.1732	0	0	" title="Overlapping EnrichrSubstrates" data-content="PAK5 targets 1 genes from the input gene list.The full list of substrates is available below:TCF3" style="cursor: pointer; text-decoration: underline dotted;">1 substrates
148	NEK1	0.1795	0	0	" title="Overlapping EnrichrSubstrates" data-content="NEK1 targets 1 genes from the input gene list.The full list of substrates is available below:VHL" style="cursor: pointer; text-decoration: underline dotted;">1 substrates
149	PIM2	0.1795	0	0	" title="Overlapping EnrichrSubstrates" data-content="PIM2 targets 1 genes from the input gene list.The full list of substrates is available below:MYC" style="cursor: pointer; text-decoration: underline dotted;">1 substrates
150	ICK	0.1795	0	0	" title="Overlapping EnrichrSubstrates" data-content="ICK targets 1 genes from the input gene list.The full list of substrates is available below:SIRT2" style="cursor: pointer; text-decoration: underline dotted;">1 substrates
151	MARK3	0.1795	0	0	" title="Overlapping EnrichrSubstrates" data-content="MARK3 targets 1 genes from the input gene list.The full list of substrates is available below:DDB1" style="cursor: pointer; text-decoration: underline dotted;">1 substrates
152	FYN	0.1849	0	0	" title="Overlapping EnrichrSubstrates" data-content="FYN targets 3 genes from the input gene list.The full list of substrates is available below:SPI1 PRKCD SIRT2" style="cursor: pointer; text-decoration: underline dotted;">3 substrates
153	RPS6KA2	0.1857	0	0	" title="Overlapping EnrichrSubstrates" data-content="RPS6KA2 targets 1 genes from the input gene list.The full list of substrates is available below:GSK3B" style="cursor: pointer; text-decoration: underline dotted;">1 substrates
154	RPS6KB2	0.1919	0	0	" title="Overlapping EnrichrSubstrates" data-content="RPS6KB2 targets 1 genes from the input gene list.The full list of substrates is available below:GSK3B" style="cursor: pointer; text-decoration: underline dotted;">1 substrates
155	TNK2	0.1981	0	0	" title="Overlapping EnrichrSubstrates" data-content="TNK2 targets 1 genes from the input gene list.The full list of substrates is available below:HIST1H4A" style="cursor: pointer; text-decoration: underline dotted;">1 substrates
156	SGK3	0.1981	0	0	" title="Overlapping EnrichrSubstrates" data-content="SGK3 targets 1 genes from the input gene list.The full list of substrates is available below:GSK3B" style="cursor: pointer; text-decoration: underline dotted;">1 substrates
157	BMX	0.2042	0	0	" title="Overlapping EnrichrSubstrates" data-content="BMX targets 1 genes from the input gene list.The full list of substrates is available below:PIM1" style="cursor: pointer; text-decoration: underline dotted;">1 substrates
158	CAMK4	0.2042	0	0	" title="Overlapping EnrichrSubstrates" data-content="CAMK4 targets 1 genes from the input gene list.The full list of substrates is available below:RELA" style="cursor: pointer; text-decoration: underline dotted;">1 substrates
159	STK3	0.2042	0	0	" title="Overlapping EnrichrSubstrates" data-content="STK3 targets 1 genes from the input gene list.The full list of substrates is available below:HIST1H3A" style="cursor: pointer; text-decoration: underline dotted;">1 substrates
160	GRK2	0.2042	0	0	" title="Overlapping EnrichrSubstrates" data-content="GRK2 targets 1 genes from the input gene list.The full list of substrates is available below:SMAD2" style="cursor: pointer; text-decoration: underline dotted;">1 substrates
161	PRKCH	0.2102	0	0	" title="Overlapping EnrichrSubstrates" data-content="PRKCH targets 1 genes from the input gene list.The full list of substrates is available below:GSK3B" style="cursor: pointer; text-decoration: underline dotted;">1 substrates
162	JAK1	0.2102	0	0	" title="Overlapping EnrichrSubstrates" data-content="JAK1 targets 1 genes from the input gene list.The full list of substrates is available below:HIST1H3A" style="cursor: pointer; text-decoration: underline dotted;">1 substrates
163	RIPK3	0.2106	0	0	" title="Overlapping EnrichrSubstrates" data-content="RIPK3 targets 2 genes from the input gene list.The full list of substrates is available below:DAXX TUBB" style="cursor: pointer; text-decoration: underline dotted;">2 substrates
164	PRKCB	0.2121	0	0	" title="Overlapping EnrichrSubstrates" data-content="PRKCB targets 3 genes from the input gene list.The full list of substrates is available below:HIST1H3A JUN GSK3B" style="cursor: pointer; text-decoration: underline dotted;">3 substrates
165	PKN1	0.2162	0	0	" title="Overlapping EnrichrSubstrates" data-content="PKN1 targets 1 genes from the input gene list.The full list of substrates is available below:HIST1H3A" style="cursor: pointer; text-decoration: underline dotted;">1 substrates
166	YES1	0.2222	0	0	" title="Overlapping EnrichrSubstrates" data-content="YES1 targets 1 genes from the input gene list.The full list of substrates is available below:PRKCD" style="cursor: pointer; text-decoration: underline dotted;">1 substrates
167	BMPR1B	0.2281	0	0	" title="Overlapping EnrichrSubstrates" data-content="BMPR1B targets 1 genes from the input gene list.The full list of substrates is available below:SMAD2" style="cursor: pointer; text-decoration: underline dotted;">1 substrates
168	PDGFRB	0.2339	0	0	" title="Overlapping EnrichrSubstrates" data-content="PDGFRB targets 1 genes from the input gene list.The full list of substrates is available below:PRKCD" style="cursor: pointer; text-decoration: underline dotted;">1 substrates
169	MAPK11	0.2386	0	0	" title="Overlapping EnrichrSubstrates" data-content="MAPK11 targets 2 genes from the input gene list.The full list of substrates is available below:JUN CEBPB" style="cursor: pointer; text-decoration: underline dotted;">2 substrates
170	MAP3K5	0.2398	0	0	" title="Overlapping EnrichrSubstrates" data-content="MAP3K5 targets 1 genes from the input gene list.The full list of substrates is available below:DAXX" style="cursor: pointer; text-decoration: underline dotted;">1 substrates
171	PKG1CGKI	0.2455	0	0	" title="Overlapping EnrichrSubstrates" data-content="PKG1CGKI targets 1 genes from the input gene list.The full list of substrates is available below:SP1" style="cursor: pointer; text-decoration: underline dotted;">1 substrates
172	CAMK2A	0.2498	0	0	" title="Overlapping EnrichrSubstrates" data-content="CAMK2A targets 2 genes from the input gene list.The full list of substrates is available below:MYC SMAD2" style="cursor: pointer; text-decoration: underline dotted;">2 substrates
173	RET	0.2513	0	0	" title="Overlapping EnrichrSubstrates" data-content="RET targets 1 genes from the input gene list.The full list of substrates is available below:MAPK1" style="cursor: pointer; text-decoration: underline dotted;">1 substrates
174	ALK	0.2513	0	0	" title="Overlapping EnrichrSubstrates" data-content="ALK targets 1 genes from the input gene list.The full list of substrates is available below:RELA" style="cursor: pointer; text-decoration: underline dotted;">1 substrates
175	ARAF	0.257	0	0	" title="Overlapping EnrichrSubstrates" data-content="ARAF targets 1 genes from the input gene list.The full list of substrates is available below:PRKCD" style="cursor: pointer; text-decoration: underline dotted;">1 substrates
176	MARK2	0.257	0	0	" title="Overlapping EnrichrSubstrates" data-content="MARK2 targets 1 genes from the input gene list.The full list of substrates is available below:GSK3B" style="cursor: pointer; text-decoration: underline dotted;">1 substrates
177	MAP3K14	0.2582	0	0	" title="Overlapping EnrichrSubstrates" data-content="MAP3K14 targets 2 genes from the input gene list.The full list of substrates is available below:HNRNPU TUBB" style="cursor: pointer; text-decoration: underline dotted;">2 substrates
178	STK11	0.2682	0	0	" title="Overlapping EnrichrSubstrates" data-content="STK11 targets 1 genes from the input gene list.The full list of substrates is available below:SMAD4" style="cursor: pointer; text-decoration: underline dotted;">1 substrates
179	HCK	0.2682	0	0	" title="Overlapping EnrichrSubstrates" data-content="HCK targets 1 genes from the input gene list.The full list of substrates is available below:SPI1" style="cursor: pointer; text-decoration: underline dotted;">1 substrates
180	MAP2K2	0.2738	0	0	" title="Overlapping EnrichrSubstrates" data-content="MAP2K2 targets 1 genes from the input gene list.The full list of substrates is available below:MAPK1" style="cursor: pointer; text-decoration: underline dotted;">1 substrates
181	DYRK1A	0.2738	0	0	" title="Overlapping EnrichrSubstrates" data-content="DYRK1A targets 1 genes from the input gene list.The full list of substrates is available below:SIRT1" style="cursor: pointer; text-decoration: underline dotted;">1 substrates
182	ABL2	0.2738	0	0	" title="Overlapping EnrichrSubstrates" data-content="ABL2 targets 1 genes from the input gene list.The full list of substrates is available below:CEBPB" style="cursor: pointer; text-decoration: underline dotted;">1 substrates
183	RIPK1	0.2793	0	0	" title="Overlapping EnrichrSubstrates" data-content="RIPK1 targets 1 genes from the input gene list.The full list of substrates is available below:TUBB" style="cursor: pointer; text-decoration: underline dotted;">1 substrates
184	PKCIOTA	0.2903	0	0	" title="Overlapping EnrichrSubstrates" data-content="PKCIOTA targets 1 genes from the input gene list.The full list of substrates is available below:RELA" style="cursor: pointer; text-decoration: underline dotted;">1 substrates
185	RIPK2	0.2903	0	0	" title="Overlapping EnrichrSubstrates" data-content="RIPK2 targets 1 genes from the input gene list.The full list of substrates is available below:TUBB" style="cursor: pointer; text-decoration: underline dotted;">1 substrates
186	CSNK1D	0.2957	0	0	" title="Overlapping EnrichrSubstrates" data-content="CSNK1D targets 1 genes from the input gene list.The full list of substrates is available below:HIF1A" style="cursor: pointer; text-decoration: underline dotted;">1 substrates
187	IKKBETA	0.301	0	0	" title="Overlapping EnrichrSubstrates" data-content="IKKBETA targets 1 genes from the input gene list.The full list of substrates is available below:RELA" style="cursor: pointer; text-decoration: underline dotted;">1 substrates
188	PRKCG	0.3063	0	0	" title="Overlapping EnrichrSubstrates" data-content="PRKCG targets 1 genes from the input gene list.The full list of substrates is available below:GSK3B" style="cursor: pointer; text-decoration: underline dotted;">1 substrates
189	MAP2K4	0.3272	0	0	" title="Overlapping EnrichrSubstrates" data-content="MAP2K4 targets 1 genes from the input gene list.The full list of substrates is available below:DAXX" style="cursor: pointer; text-decoration: underline dotted;">1 substrates
190	ABL	0.3574	0	0	" title="Overlapping EnrichrSubstrates" data-content="ABL targets 1 genes from the input gene list.The full list of substrates is available below:CDK2" style="cursor: pointer; text-decoration: underline dotted;">1 substrates
191	PKAGAMMA	0.3623	0	0	" title="Overlapping EnrichrSubstrates" data-content="PKAGAMMA targets 1 genes from the input gene list.The full list of substrates is available below:RELA" style="cursor: pointer; text-decoration: underline dotted;">1 substrates
192	CAMKIIALPHA	0.372	0	0	" title="Overlapping EnrichrSubstrates" data-content="CAMKIIALPHA targets 1 genes from the input gene list.The full list of substrates is available below:CEBPB" style="cursor: pointer; text-decoration: underline dotted;">1 substrates
193	TGFBR1	0.372	0	0	" title="Overlapping EnrichrSubstrates" data-content="TGFBR1 targets 1 genes from the input gene list.The full list of substrates is available below:SMAD2" style="cursor: pointer; text-decoration: underline dotted;">1 substrates
194	SGK1	0.3956	0	0	" title="Overlapping EnrichrSubstrates" data-content="SGK1 targets 1 genes from the input gene list.The full list of substrates is available below:MAPK1" style="cursor: pointer; text-decoration: underline dotted;">1 substrates
195	BTK	0.4048	0	0	" title="Overlapping EnrichrSubstrates" data-content="BTK targets 1 genes from the input gene list.The full list of substrates is available below:JUN" style="cursor: pointer; text-decoration: underline dotted;">1 substrates
196	RPS6KB1	0.4093	0	0	" title="Overlapping EnrichrSubstrates" data-content="RPS6KB1 targets 1 genes from the input gene list.The full list of substrates is available below:GSK3B" style="cursor: pointer; text-decoration: underline dotted;">1 substrates
197	ROCK1	0.4272	0	0	" title="Overlapping EnrichrSubstrates" data-content="ROCK1 targets 1 genes from the input gene list.The full list of substrates is available below:HIST1H3A" style="cursor: pointer; text-decoration: underline dotted;">1 substrates
198	PRKD1	0.4315	0	0	" title="Overlapping EnrichrSubstrates" data-content="PRKD1 targets 1 genes from the input gene list.The full list of substrates is available below:JUN" style="cursor: pointer; text-decoration: underline dotted;">1 substrates
199	PKCGAMMA	0.4315	0	0	" title="Overlapping EnrichrSubstrates" data-content="PKCGAMMA targets 1 genes from the input gene list.The full list of substrates is available below:PRKCD" style="cursor: pointer; text-decoration: underline dotted;">1 substrates
200	MAPK13	0.4359	0	0	" title="Overlapping EnrichrSubstrates" data-content="MAPK13 targets 1 genes from the input gene list.The full list of substrates is available below:JUN" style="cursor: pointer; text-decoration: underline dotted;">1 substrates
201	AURORAB	0.4487	0	0	" title="Overlapping EnrichrSubstrates" data-content="AURORAB targets 1 genes from the input gene list.The full list of substrates is available below:RB1" style="cursor: pointer; text-decoration: underline dotted;">1 substrates
202	BARK1	0.4487	0	0	" title="Overlapping EnrichrSubstrates" data-content="BARK1 targets 1 genes from the input gene list.The full list of substrates is available below:PRKCD" style="cursor: pointer; text-decoration: underline dotted;">1 substrates
203	MAPK12	0.4815	0	0	" title="Overlapping EnrichrSubstrates" data-content="MAPK12 targets 1 genes from the input gene list.The full list of substrates is available below:JUN" style="cursor: pointer; text-decoration: underline dotted;">1 substrates
204	TTK	0.5486	0	0	" title="Overlapping EnrichrSubstrates" data-content="TTK targets 1 genes from the input gene list.The full list of substrates is available below:CDK2" style="cursor: pointer; text-decoration: underline dotted;">1 substrates
205	ERBB2	0.5722	0	0	" title="Overlapping EnrichrSubstrates" data-content="ERBB2 targets 1 genes from the input gene list.The full list of substrates is available below:NCOR1" style="cursor: pointer; text-decoration: underline dotted;">1 substrates
206	PKAALPHA	0.582	0	0	" title="Overlapping EnrichrSubstrates" data-content="PKAALPHA targets 1 genes from the input gene list.The full list of substrates is available below:RELA" style="cursor: pointer; text-decoration: underline dotted;">1 substrates
