# Supplementary material for: Signatures of Co-Deregulated Genes and Their Transcriptional Regulators in Lung Cancer
Source: Int J Mol Sci. 2022 Sep 18;23(18):10933. doi: 10.3390/ijms231810933 (PMC9504879; doi:10.3390/ijms231810933)
Supplement: Supplementary file 1 [file ijms-23-10933-s001.zip › Table S15.xlsx]

## Sheet: Table S15
Table S15: Protein-protein interaction (PPI) sub-network around proteins encoded by the co-downregulated genes in LC after single-drug perturbation.
X2K
Rank	Transcription Factor	Hypergeometric p-value	Z-score	Combined score	Enriched Targets
1	MYC	1.274e-40	0	0	" title="Overlapping EnrichrTargets" data-content="MYC targets 90 genes from the input gene list.Associations were determined from the following experiment:The full list of targets is available below:RPL4 RPL5 RPL32 TFRC RPL8 RPL6 GJA1 RPL35 IER2 RPL27 RPL26 ZNF146 MRPL23 HNRNPK RPLP1 CTCF MRPL45 RPL10 RPL12 RPL11 ODC1 RPS15A RPS3 RPS2 RPL18 RPL17 RPL19 TUBB4B LAPTM4A KPNA2 RPS9 RPS7 RPS8 MORF4L1…
2	MYC	2.472e-34	0	0	" title="Overlapping EnrichrTargets" data-content="MYC targets 131 genes from the input gene list.Associations were determined from the following experiment:The full list of targets is available below:POP7 TFRC MTHFD1 MTHFD2 ATF4 RPLP1 TUBA1C TUBA1B DUSP1 MRPL45 CKS2 ARF6 ODC1 APEX1 ACLY SRSF2 SRSF7 HSP90AB1 ETF1 TOP1 SLC25A6 NOP56 NOP58 HNRNPAB EIF3M EIF3E EIF4A2 EIF4A1 SNRPD2 MIF PCBP1 AIMP2 DH…
3	TAF1	1.655e-32	0	0	" title="Overlapping EnrichrTargets" data-content="TAF1 targets 198 genes from the input gene list.Associations were determined from the following experiment:The full list of targets is available below:TFRC MTHFD2 DUSP1 APEX1 LAPTM4A SRSF2 SRSF3 SRSF7 UQCRB ETF1 TOP1 GAPDH NOP56 NOP58 TRIM28 BSG XBP1 MRPS24 MRPS34 COX5B VMP1 UBA2 SLC3A2 RARS RPS15A PARK7 MORF4L1 MCM7 MGME1 DNAJA1 RPS14 RPS16 RPS1…
4	NELFE	8.944e-28	0	0	" title="Overlapping EnrichrTargets" data-content="NELFE targets 50 genes from the input gene list.Associations were determined from the following experiment:The full list of targets is available below:EIF4A2 TFRC ACTB RPS16 BSG ATF4 LDHA EGR1 H3F3B SNHG5 EIF1 RPS28 RPL27A ID2 RPS20 HIST1H4C CALM1 RPLP1 TUBA1C TUBA1B DUSP1 SLC7A5 RPL10 RPL12 ODC1 RPS2 NPM1 TUBB4B ZFAND5 RPL10A ACTG1 RPS9 SRSF2 SR…
5	PML	6.351e-26	0	0	" title="Overlapping EnrichrTargets" data-content="PML targets 120 genes from the input gene list.Associations were determined from the following experiment:The full list of targets is available below:POP7 TFRC MTHFD2 C12ORF57 DUSP1 SRSF2 SRSF3 SRSF7 GAPDH NOP56 NOP58 HNRNPAB TRIM28 XBP1 AIMP2 NANP COX5B HNRNPA2B1 ZFAND5 ACTG1 PPIA DDX5 TMEM230 HIGD2A UBE2S SLC3A2 LDHA HNRNPK RARS TK1 RPS15A YTHD…
6	TAF7	3.275e-24	0	0	" title="Overlapping EnrichrTargets" data-content="TAF7 targets 72 genes from the input gene list.Associations were determined from the following experiment:The full list of targets is available below:RPL4 RPL5 RPL32 TFRC ENO1 RPL6 RPL35 RPL27 ATF4 C12ORF57 H3F3B EIF1 RPLP1 TUBA1C TUBA1B DUSP1 CKS2 RPL10 RPL11 ODC1 RPS15A RPS3 CKB RPS2 RPL17 YTHDF2 TUBB4B RPS7 RPS8 SNRPG SRSF2 SRSF7 SLC38A2 HSP90…
7	ATF2	2.573e-22	0	0	" title="Overlapping EnrichrTargets" data-content="ATF2 targets 160 genes from the input gene list.Associations were determined from the following experiment:The full list of targets is available below:POP7 TFRC MTHFD2 ATF4 C12ORF57 DUSP1 APEX1 CDC25B SRSF2 SRSF3 SRSF7 UQCRB HSP90B1 ETF1 GAPDH NOP58 EIF3E TRIM28 SNRPD2 EGR1 COX7B COX8A MRPS34 VMP1 HNRNPA2B1 ZFAND5 PPIB PPIA DDX5 COX16 TMEM230 HIG…
8	MAX	2.925e-18	0	0	" title="Overlapping EnrichrTargets" data-content="MAX targets 123 genes from the input gene list.Associations were determined from the following experiment:The full list of targets is available below:POP7 TFRC MTHFD1 MTHFD2 DUSP1 SLC7A5 ODC1 CENPF APEX1 SRSF7 PGK1 ETF1 TOP1 NOP56 NOP58 HNRNPAB EIF3E BSG XBP1 AIMP2 NANP VMP1 HDGF ZFAND5 PPIA DDX5 TMEM230 HIGD2A UBE2S SLC3A2 TRA2B PHB2 LDHA RRS1 P…
9	BRCA1	4.375e-16	0	0	" title="Overlapping EnrichrTargets" data-content="BRCA1 targets 157 genes from the input gene list.Associations were determined from the following experiment:The full list of targets is available below:TFRC MTHFD1 MTHFD2 DUSP1 APEX1 SRSF2 SRSF7 ETF1 GAPDH NOP56 NOP58 SSB XBP1 COX7B MRPS24 COX5B VMP1 ALCAM RPS15A PARK7 MORF4L1 MCM7 MGME1 DNAJA1 RPS14 RPS16 RPS19 RPS11 RPS25 RPS28 RPS29 RPS20 TMED…
10	CEBPD	7.941e-16	0	0	" title="Overlapping EnrichrTargets" data-content="CEBPD targets 63 genes from the input gene list.Associations were determined from the following experiment:The full list of targets is available below:TFRC ENO1 RPL9 MYC RPL26 ATF4 OAZ1 C12ORF57 H3F3B EIF1 RPLP1 CTCF TUBA1C TUBA1B DUSP1 CKS2 RPL10 TIMM13 RPL18 TUBB4B SRSF2 SRSF3 ADNP SRSF7 SLC38A2 RSL24D1 TNFRSF1A PKM ETF1 HNRNPAB EIF4A2 EIF4A1 A…
11	E2F1	2.179e-14	0	0	" title="Overlapping EnrichrTargets" data-content="E2F1 targets 66 genes from the input gene list.Associations were determined from the following experiment:The full list of targets is available below:EIF1 RPLP1 TUBA1B MRPL45 PSMC6 SRSF2 SRSF7 HSP90AA1 HNRNPAB EIF3E BSG MIF ID3 COX8A PCNA CCT4 RPA3 HNRNPA2B1 DKC1 COX16 COX17 CCNB2 RHPN2 DDX47 SLC3A2 AURKA MAT2A TRA2B SSRP1 GALC RAN EPS8 MYC RPL26…
12	ZMIZ1	3.54e-14	0	0	" title="Overlapping EnrichrTargets" data-content="ZMIZ1 targets 68 genes from the input gene list.Associations were determined from the following experiment:The full list of targets is available below:ATF4 EIF1 RPLP1 TUBA1C DUSP1 SLC7A5 MRPL51 GSTP1 CENPA ACLY SRSF3 SRSF7 HSP90AB1 HSP90AA1 SSB HNRNPAB EIF3M EIF4A1 ACTB TRIB3 EGR1 CALM1 TNFRSF12A CRIP1 ZFAND5 ACTG1 DKC1 GEMIN6 PPIB PPIA DDX5 DDX3…
13	SIN3A	3.545e-13	0	0	" title="Overlapping EnrichrTargets" data-content="SIN3A targets 75 genes from the input gene list.Associations were determined from the following experiment:The full list of targets is available below:TFRC MTHFD2 OAZ1 C12ORF57 HSPH1 RPLP1 TUBA1C TUBA1B DUSP1 MRPL51 CKS2 RNASEK CENPF APEX1 KPNA2 SRSF2 SRSF7 SLC38A2 HSP90AB1 GAPDH NOP56 NOP58 HNRNPAB EIF4A1 EIF4A3 SNRPD2 AIMP2 ID2 ID1 KIF23 CCT7 C…
14	KLF4	3.679e-13	0	0	" title="Overlapping EnrichrTargets" data-content="KLF4 targets 69 genes from the input gene list.Associations were determined from the following experiment:The full list of targets is available below:ATF4 C12ORF57 CTCF TUBA1C TUBA1B LAPTM4A SLC38A2 HSP90AB1 ETF1 GAPDH CYB5A EIF4A2 EIF4A1 ACTB TRIM28 ACTN1 MIF PCBP1 XBP1 ID2 PCNA CRIP1 CCT4 HNRNPA2B1 ACTG1 TMOD3 PPIB PPIA DDX5 NPR3 CNN3 TMEM230 Y…
15	KAT2A	6.06e-13	0	0	" title="Overlapping EnrichrTargets" data-content="KAT2A targets 21 genes from the input gene list.Associations were determined from the following experiment:The full list of targets is available below:RPL4 RPL5 HSP90AB1 RPL32 RPL34 RPL9 RPL6 RPS7 RPS8 RPL27 ERH SNRPA RPL12 RPL11 HSP90B1 PCBP1 RPS3 RPS2 RPL18 EGR1 CALM1" style="cursor: pointer; text-decoration: underline dotted;">21 targets
16	TCF3	4.472e-10	0	0	" title="Overlapping EnrichrTargets" data-content="TCF3 targets 56 genes from the input gene list.Associations were determined from the following experiment:The full list of targets is available below:ATF4 TUBA1C TUBA1B DUSP1 MRPL45 ODC1 CDC25B SRSF2 HSP90AB1 HSP90AA1 ETF1 EIF4A2 ERRFI1 ACTB BSG PCBP1 PCBP2 EGR1 XBP1 CALM1 CCT4 ZFAND5 ACTG1 RGS2 PPIA DDX5 ATP2A2 ENO1 ALCAM RPL35 LDHA H3F3B TUBB4B…
17	SOX2	4.43e-09	0	0	" title="Overlapping EnrichrTargets" data-content="SOX2 targets 51 genes from the input gene list.Associations were determined from the following experiment:The full list of targets is available below:ATF4 DUSP1 SLC7A5 LAPTM4A SRSF7 LY6E SLC38A2 HSP90AB1 CYB5A ERRFI1 TRIM28 TRIB3 EPAS1 EGR3 ID2 ID1 CD24 PTPRO TXLNG CAMK2N1 HNRNPA2B1 TMOD3 ATP2A2 YWHAG SLC3A2 VIM GJA1 DKK1 LDHB FLRT3 H3F3B PBK SSR…
18	E2F4	5.928e-09	0	0	" title="Overlapping EnrichrTargets" data-content="E2F4 targets 48 genes from the input gene list.Associations were determined from the following experiment:The full list of targets is available below:POP7 MYC IER2 MTHFD1 PLK1 EIF1 HNRNPK CTCF TUBA1B PBK TK1 MRPL51 CENPF SRSF2 SRSF3 SRSF7 MCM7 MCM3 MCM6 MGME1 NOP58 HNRNPAB PRC1 EIF4A2 RPS16 BSG SNHG5 NET1 ANP32E RPS20 TOP2A DHX15 COX8A KIF23 PCNA…
19	CHD1	3.21e-08	0	0	" title="Overlapping EnrichrTargets" data-content="CHD1 targets 44 genes from the input gene list.Associations were determined from the following experiment:The full list of targets is available below:LDHA EIF1 PHF23 RPLP1 TUBA1C SLC7A5 CKS2 RNASEK RPL10 RPS15A ZSWIM6 RPL19 LAPTM4A RPS8 SRSF2 SRXN1 LBR HSP90AA1 GPX4 PKM POLR2L NOP56 SSB RPL36AL PFN1 MYL12A PTDSS1 ANP32E CALM1 TRAM1 RAC1 RHOA UGDH…
20	FOS	2.865e-07	0	0	" title="Overlapping EnrichrTargets" data-content="FOS targets 41 genes from the input gene list.Associations were determined from the following experiment:The full list of targets is available below:MTHFD2 ATF4 H3F3B HNRNPK SSR3 RNASEK CENPA TUBB4B CENPF APEX1 LAPTM4A KPNA2 S100A2 ILF2 SNRPA HMMR HSP90B1 LBR GPX4 CTNNAL1 HNRNPAB PSAT1 EIF4A1 MANF ANP32E TOP2A TNFRSF12A CCT7 COTL1 PPIA UBC FAM83D…
21	ZBTB33	5.135e-07	0	0	" title="Overlapping EnrichrTargets" data-content="ZBTB33 targets 43 genes from the input gene list.Associations were determined from the following experiment:The full list of targets is available below:RPL4 POP7 TFRC MTHFD1 RPL26 ATF4 C12ORF57 HSPH1 HNRNPK RPL12 RPS15A RPS2 RPL17 RPL10A KPNA2 RPS9 RPS7 NCL SNRPG ERH RSL24D1 RPL7A ETF1 MGME1 NOP58 EIF4A2 EIF4A3 RPS19 RPS11 RPS28 RPL27A HIST1H4C C…
22	FOXM1	7.131e-07	0	0	" title="Overlapping EnrichrTargets" data-content="FOXM1 targets 14 genes from the input gene list.Associations were determined from the following experiment:The full list of targets is available below:PTTG1 KPNA2 LBR KIF23 CDC25B CENPA HSP90B1 CCNB2 FAM83D PLK1 TUBB4B CENPF UBE2S PRC1" style="cursor: pointer; text-decoration: underline dotted;">14 targets
23	CREB1	8.793e-07	0	0	" title="Overlapping EnrichrTargets" data-content="CREB1 targets 96 genes from the input gene list.Associations were determined from the following experiment:The full list of targets is available below:TFRC DUSP1 CENPA ZSWIM6 LAPTM4A SRSF2 SRSF3 UQCRB ETF1 NOP58 TRIM28 EGR1 EGR3 COX7B COX8A TCEB1 VMP1 HNRNPA2B1 DDX5 TMEM230 UBE2S TRA2B PHB2 LDHA HNRNPK PARK7 ILF2 MORF4L1 SNRPG ADNP SNRPA CYR61 WI…
24	NFYB	1.074e-06	0	0	" title="Overlapping EnrichrTargets" data-content="NFYB targets 141 genes from the input gene list.Associations were determined from the following experiment:The full list of targets is available below:MTHFD1 MTHFD2 APEX1 LAPTM4A SRSF2 SRSF3 ETF1 GAPDH NOP56 BSG XBP1 NET1 COX8A PCNA PLK1 CDKN1B TK1 CKB MORF4L1 FKBP4 HMMR MCM7 LBR WIPI1 MCM3 MCM6 DNAJB1 RPS24 TMED2 UBB UQCC3 HIST1H2BK RBMX OAZ1 HS…
25	CREB1	1.344e-06	0	0	" title="Overlapping EnrichrTargets" data-content="CREB1 targets 69 genes from the input gene list.Associations were determined from the following experiment:The full list of targets is available below:ATF4 HSPH1 EIF1 TUBA1C TUBA1A DUSP1 C18ORF32 ACLY SRSF2 SRSF3 SLC25A3 HSP90AB1 ETF1 TOP1 GAPDH NOP58 EIF4A2 EIF4A1 EIF4A3 ACTB PCBP2 EGR1 XBP1 ID1 COX8A PCNA TCEB1 CCT4 NPM1 VMP1 HNRNPA2B1 ZFAND5 T…
26	ZNF384	3.208e-06	0	0	" title="Overlapping EnrichrTargets" data-content="ZNF384 targets 42 genes from the input gene list.Associations were determined from the following experiment:The full list of targets is available below:RPL6 MYC RPL27 FAM136A EIF1 TUBA1C TUBA1A ANXA2 EMP1 DYNLL1 NCOR2 RPL10 TIMM13 RPS15A KPNA2 ILF2 MORF4L1 SRSF3 SLC38A2 SLC25A3 HSP90AB1 PTBP3 MCM3 NOP58 SSB RPL35A EIF4A3 ACTB RPS10 PCBP1 PCBP2 TR…
27	NFYA	3.581e-06	0	0	" title="Overlapping EnrichrTargets" data-content="NFYA targets 94 genes from the input gene list.Associations were determined from the following experiment:The full list of targets is available below:MTHFD1 MTHFD2 ATF4 C12ORF57 QARS CENPA CENPF LAPTM4A ACLY SRSF3 HSP90B1 PGK1 ETF1 HNRNPAB ACTB SNRPD2 ACTN1 XBP1 NET1 AIMP2 COX8A PCNA TCEB1 COX6B1 TMEM256 PPIB PPIA DDX5 UBE2S HNRNPK TK1 TUBB4B ILF…
28	YY1	1.491e-05	0	0	" title="Overlapping EnrichrTargets" data-content="YY1 targets 107 genes from the input gene list.Associations were determined from the following experiment:The full list of targets is available below:ATF4 C12ORF57 QARS SRSF2 SRSF3 SRSF7 UQCRB ETF1 GAPDH NOP58 EIF3E COX7B RAC1 COX8A MRPS24 MRPS34 HNRNPA2B1 PPIA DDX5 PLD3 HIGD2A UBE2S SLC3A2 CRYZ TRA2B PHB2 HNRNPM HNRNPK CDKN1B PHF23 TK1 RPS15A TU…
29	ESR1	2.933e-05	0	0	" title="Overlapping EnrichrTargets" data-content="ESR1 targets 15 genes from the input gene list.Associations were determined from the following experiment:The full list of targets is available below:ACTB TNS3 FKBP4 ZFP36L1 UBB XBP1 EFNA1 ID2 ID3 EDN1 NCOR2 TOP1 SEMA3C CA12 MLPH" style="cursor: pointer; text-decoration: underline dotted;">15 targets
30	ETS1	3.366e-05	0	0	" title="Overlapping EnrichrTargets" data-content="ETS1 targets 15 genes from the input gene list.Associations were determined from the following experiment:The full list of targets is available below:RPL35 RPS11 IER3 ADNP SRSF7 MYL12A UBB UBC HIGD2A HSP90AB1 RPS4X RPS3A PKM CKS2 MGME1" style="cursor: pointer; text-decoration: underline dotted;">15 targets
31	NANOG	7.46e-05	0	0	" title="Overlapping EnrichrTargets" data-content="NANOG targets 33 genes from the input gene list.Associations were determined from the following experiment:The full list of targets is available below:ENO1 GJA1 DKK1 MTHFD1 LDHB FLRT3 CDKN1B TUBB2B CKS2 TUBB4B TMSB10 ASNS CYR61 HSP90AA1 EIF4A2 ACTN4 ID2 ID1 RPS21 RPS23 EDN1 TCEB1 NQO1 BASP1 ZFP36L1 UBB RHPN2 NFKBIA YWHAG H2AFZ AURKA SCD VIM" styl…
32	NFIC	9.01e-05	0	0	" title="Overlapping EnrichrTargets" data-content="NFIC targets 20 genes from the input gene list.Associations were determined from the following experiment:The full list of targets is available below:EPS8 RPS14 MT2A MYL12A C12ORF57 LDHA EGR1 DUSP1 HNRNPA2B1 ACLY ZFP36L1 CBX3 TMEM230 NFKBIA KLF10 GPX4 PKM GAPDH REPIN1 TRA2B" style="cursor: pointer; text-decoration: underline dotted;">20 targets
33	PBX3	0.0001249	0	0	" title="Overlapping EnrichrTargets" data-content="PBX3 targets 56 genes from the input gene list.Associations were determined from the following experiment:The full list of targets is available below:ZNF281 MTHFD1 MTHFD2 ATF4 C12ORF57 EIF1 TUBA1B CENPA LAPTM4A SRSF7 PGK1 HSP90AB1 GAPDH CYB5A HNRNPAB PRC1 EIF4A2 EIF4A1 ACTB ACTN1 ID2 CALM1 COX8A CCT7 COX6B1 PPIA DDX5 TMEM230 UBE2S RPL4 ENO1 IER3 …
34	CEBPB	0.000199	0	0	" title="Overlapping EnrichrTargets" data-content="CEBPB targets 13 genes from the input gene list.Associations were determined from the following experiment:The full list of targets is available below:EIF4A1 ACTB COTL1 RPL26 UBB EIF1 NFKBIA RPS24 YBX3 GPX4 TNFRSF1A ETF1 XPOT" style="cursor: pointer; text-decoration: underline dotted;">13 targets
35	GABPA	0.0003463	0	0	" title="Overlapping EnrichrTargets" data-content="GABPA targets 80 genes from the input gene list.Associations were determined from the following experiment:The full list of targets is available below:ATF4 SRSF2 HSP90B1 PGK1 ETF1 EIF3M SNRPD2 TRIB3 TRIM16 RAC1 COX8A MRPS34 COX5B TCEB1 VMP1 COX6B1 PPIB DDX5 COX16 PLD3 TMEM230 HIGD2A UBA2 TRA2B SSRP1 PHB2 RRS1 PHF23 RARS RSL24D1 MCM7 DNAJA1 RPS14 …
36	FOSL2	0.0003534	0	0	" title="Overlapping EnrichrTargets" data-content="FOSL2 targets 15 genes from the input gene list.Associations were determined from the following experiment:The full list of targets is available below:ENO1 KRT8 S100A10 TUBA1C TNFRSF12A KRT18 TUBB3 S100A2 UBC EFNA1 KLF10 GPX4 TGFBR2 REPIN1 CTNNAL1" style="cursor: pointer; text-decoration: underline dotted;">15 targets
37	STAT3	0.0005628	0	0	" title="Overlapping EnrichrTargets" data-content="STAT3 targets 35 genes from the input gene list.Associations were determined from the following experiment:The full list of targets is available below:MYC RPL27 RPL26 C12ORF57 DUSP1 LAPTM4A HSP90B1 RSL24D1 TNFRSF1A DNAJB1 EIF3E MT2A PCBP2 EGR1 ANP32E HIST1H4C RPS24 TMED2 COX8A TCEB1 RSRC2 HNRNPA2B1 BASP1 TMEM256 COX16 COX7A2 ZFP36L1 UBC CBX3 YBX3…
38	SPI1	0.000582	0	0	" title="Overlapping EnrichrTargets" data-content="SPI1 targets 62 genes from the input gene list.Associations were determined from the following experiment:The full list of targets is available below:ZSWIM6 LAPTM4A SRSF2 PGK1 EIF3M SNRPD2 ACTN4 RAC1 HNRNPA2B1 PPIB COX16 HIGD2A UBE2S PHB2 HNRNPK PHF23 CKB RSL24D1 MCM7 RPS19 RPL36AL RPS11 RPS25 RPS21 C9ORF3 CBX3 RPS3A PFDN5 OAZ1 HSPH1 CTCF TUBA1B …
39	SALL4	0.0007026	0	0	" title="Overlapping EnrichrTargets" data-content="SALL4 targets 21 genes from the input gene list.Associations were determined from the following experiment:The full list of targets is available below:GJA1 TRIM28 ID2 ID3 RPS20 EDN1 MRPL45 PTGES3 ZFAND5 FBL CNN3 UBB UBC SLC38A2 ASNS NFKBIA DDX3X CYR61 PKM HNRNPAB VIM" style="cursor: pointer; text-decoration: underline dotted;">21 targets
40	BCLAF1	0.0007176	0	0	" title="Overlapping EnrichrTargets" data-content="BCLAF1 targets 39 genes from the input gene list.Associations were determined from the following experiment:The full list of targets is available below:TFRC C12ORF57 EIF1 TUBA1B SRSF7 SLC38A2 HSP90AB1 PCBP2 EGR1 MRPS34 CCT7 HNRNPA2B1 COX16 HIGD2A SLC3A2 TRA2B PHB2 RPL10 RPL11 RPL18 YTHDF2 RPS7 RPS8 SNRPG RSL24D1 PTBP3 RPL35A RPS19 MYL12A SNHG5 RP…
41	SPI1	0.0012	0	0	" title="Overlapping EnrichrTargets" data-content="SPI1 targets 45 genes from the input gene list.Associations were determined from the following experiment:The full list of targets is available below:OAZ1 C12ORF57 TUBA1C CKS2 ARF6 ZSWIM6 PGK1 TNFRSF1A ETF1 NDUFB9 EIF3M EIF4A1 SNRPD2 RPL27A ID3 TCEB1 CCT4 VMP1 PLAT COX16 UBE2S SLC3A2 RPL8 RPL6 IER2 RPL27 PHF23 RPL10 RPS3 RPL17 IGFBP4 ADNP RSL24D1…
42	BCL3	0.00132	0	0	" title="Overlapping EnrichrTargets" data-content="BCL3 targets 17 genes from the input gene list.Associations were determined from the following experiment:The full list of targets is available below:ACTB ALCAM IER3 PFN1 C12ORF57 ZNF146 CALM1 C18ORF32 RPS7 ALDH3A1 ADNP NOP2 UBB UBC TMEM230 NFKBIA GPX4" style="cursor: pointer; text-decoration: underline dotted;">17 targets
43	FLI1	0.00139	0	0	" title="Overlapping EnrichrTargets" data-content="FLI1 targets 31 genes from the input gene list.Associations were determined from the following experiment:The full list of targets is available below:RPL34 PHB2 RPL6 IER2 RPL27 LDHA CYB5R3 RRS1 PHF23 RPLP1 RARS SSR2 RNASEK RPS3 RPS7 RSL24D1 MCM3 NDUFB9 RPS14 RPS19 RPS11 MYL12A RPL27A RPS21 COX5B COX17 NOP2 COX7A2 TMEM230 DDX21 TRA2B" style="curso…
44	E2F6	0.002162	0	0	" title="Overlapping EnrichrTargets" data-content="E2F6 targets 110 genes from the input gene list.Associations were determined from the following experiment:The full list of targets is available below:TFRC MTHFD1 MTHFD2 DUSP1 GSTP1 SRSF2 SRSF7 TOP1 GAPDH NOP56 NOP58 BSG MRPS34 CNN3 UBA2 SLC3A2 GALC TK1 CKB FKBP4 MCM7 LBR MCM3 MCM6 MGME1 RPS11 RPS20 TUBA1B EMP2 DYNLL1 ARF6 PFKFB3 EIF4A1 MIF DHX15…
45	TCF3	0.002513	0	0	" title="Overlapping EnrichrTargets" data-content="TCF3 targets 42 genes from the input gene list.Associations were determined from the following experiment:The full list of targets is available below:C12ORF57 EIF1 DUSP1 C18ORF32 HSP90AA1 EIF4A2 TRIM28 ACTN1 ACTN4 ID1 ID3 TXLNG TMOD3 NPR3 CNN3 RHPN2 YWHAG SLC3A2 AURKA VIM ENO1 GJA1 MYC DKK1 CPED1 LDHB FLRT3 RPS8 ADNP FKBP4 ASNS GPX4 PKM RPS19 C8O…
46	CTCF	0.0033	0	0	" title="Overlapping EnrichrTargets" data-content="CTCF targets 66 genes from the input gene list.Associations were determined from the following experiment:The full list of targets is available below:POP7 MTHFD2 DUSP1 ACTB EGR1 TAGLN PCNA MRPS34 CAV1 CRYZ ALCAM FLRT3 RRS1 PLK2 RARS TK1 NCOR2 YTHDF2 PARK7 RPL10A MORF4L1 ADNP CYR61 RPS14 RPS19 RPL18A MYL12A RPS29 RPS20 EDN1 FAM83D RPS4X H2AFZ RPS3…
47	ELF1	0.00426	0	0	" title="Overlapping EnrichrTargets" data-content="ELF1 targets 86 genes from the input gene list.Associations were determined from the following experiment:The full list of targets is available below:ZSWIM6 PGK1 ETF1 EIF3M COX8A MRPS34 COX5B VMP1 COX16 TMEM230 HIGD2A PHB2 RRS1 PHF23 YTHDF2 SNRPG SNRPA MCM7 MCM3 LEPROT DNAJA1 RPS14 RPS16 RPS19 RPL36AL RPS11 RPS10 MYL12A RPS25 TMED2 C9ORF3 XPOT CO…
48	SP1	0.00466	0	0	" title="Overlapping EnrichrTargets" data-content="SP1 targets 31 genes from the input gene list.Associations were determined from the following experiment:The full list of targets is available below:C12ORF57 H3F3B HNRNPK SSR3 SRP9 CENPA RPS2 TUBB4B ILF2 SNRPA HSP90B1 PGK1 GPX4 WIPI1 MCM3 HNRNPAB EIF4A1 RPS19 MYL12A ANP32E HIST1H4C TOP2A COTL1 COX6B1 TMEM256 UBC FAM83D YBX1 ATP5G1 HIST1H2BK TOB1"…
49	PPARG	0.005037	0	0	" title="Overlapping EnrichrTargets" data-content="PPARG targets 25 genes from the input gene list.Associations were determined from the following experiment:The full list of targets is available below:SDPR RPL27 ATF4 TUBA1C SRSF3 SRSF7 PTBP3 NOP56 ACTB ACTN4 PCBP1 XBP1 NANP CBR1 VMP1 ZFAND5 UBB UBC YBX3 YWHAG HPGD PON2 TOB1 SCD VIM" style="cursor: pointer; text-decoration: underline dotted;">25 …
50	RELA	0.005804	0	0	" title="Overlapping EnrichrTargets" data-content="RELA targets 23 genes from the input gene list.Associations were determined from the following experiment:The full list of targets is available below:RPL5 IER3 RPL18 PARK7 RPL10A RPS7 HSP90B1 HSP90AB1 RPL7A PKM EIF4A2 ACTB RPS19 PFN1 MYL12A PCBP1 RPS28 ANP32E ZFP36L1 NFKBIA KLF10 SLC3A2 CRYZ" style="cursor: pointer; text-decoration: underline dot…
51	SRF	0.007257	0	0	" title="Overlapping EnrichrTargets" data-content="SRF targets 16 genes from the input gene list.Associations were determined from the following experiment:The full list of targets is available below:RPL32 ACTB IER2 PFN1 MYL12A EGR1 EGR3 RPL10 RPS15A ZSWIM6 RPL18 HDGF ACTG1 PFKFB3 COX16 AURKA" style="cursor: pointer; text-decoration: underline dotted;">16 targets
52	SP2	0.009368	0	0	" title="Overlapping EnrichrTargets" data-content="SP2 targets 39 genes from the input gene list.Associations were determined from the following experiment:The full list of targets is available below:EIF1 CENPA LAPTM4A SLC25A3 CYB5A EIF4A1 ACTN1 PCBP2 ID2 CCT7 COX6B1 PPIA SSRP1 ENO1 HNRNPK RPL10 RPL11 RPL18 YTHDF2 TUBB4B RPS9 RPS7 SNRPA SHFM1 RPL18A RPL36AL MANF ANP32E RPS20 TOP2A TRAM1 RANBP1 CO…
53	RCOR1	0.01284	0	0	" title="Overlapping EnrichrTargets" data-content="RCOR1 targets 29 genes from the input gene list.Associations were determined from the following experiment:The full list of targets is available below:ENO1 IER3 CYB5R3 CDKN1B DUSP1 DYNLL1 NCOR2 TKT ZSWIM6 ERH HSP90AB1 PTBP3 PKM REPIN1 DNAJB1 RPL18A IL12A MYL12A AIMP2 RPS25 RAC1 MMD KIF23 COX6C TOMM5 TMOD3 UBC H2AFZ SCD" style="cursor: pointer; te…
54	ZBTB7A	0.01335	0	0	" title="Overlapping EnrichrTargets" data-content="ZBTB7A targets 74 genes from the input gene list.Associations were determined from the following experiment:The full list of targets is available below:POP7 TSKU ATF4 C12ORF57 DUSP1 ODC1 ZSWIM6 HSP90B1 TOP1 ACTB ACTN1 EGR1 TAGLN MRPS34 HNRNPA2B1 ACTG1 TMEM256 HNRNPM NCOR2 TUBB2B CKB YTHDF2 TUBB4B MORF4L1 ADNP POLR2L SIK1 RPS21 XPOT UBC CBX3 OAZ1 …
55	NRF1	0.01404	0	0	" title="Overlapping EnrichrTargets" data-content="NRF1 targets 65 genes from the input gene list.Associations were determined from the following experiment:The full list of targets is available below:POP7 MTHFD1 ODC1 LAPTM4A SRSF2 UQCRB TOP1 SSB EIF3E BSG ACTN4 NANP PCNA COX6C PPIA COX17 PLD3 SLC3A2 LDHA HNRNPM PHF23 TUBB4B PARK7 MORF4L1 HMMR RSL24D1 MCM6 RPS16 RPS29 RPS21 C9ORF3 PTGES3 NOP2 EIF…
56	TRIM28	0.017	0	0	" title="Overlapping EnrichrTargets" data-content="TRIM28 targets 8 genes from the input gene list.Associations were determined from the following experiment:The full list of targets is available below:RPS7 SRSF7 DDX5 COX16 C12ORF57 HIST1H4C HSP90AB1 DUSP1" style="cursor: pointer; text-decoration: underline dotted;">8 targets
57	PPARD	0.02193	0	0	" title="Overlapping EnrichrTargets" data-content="PPARD targets 14 genes from the input gene list.Associations were determined from the following experiment:The full list of targets is available below:RPS16 MYC TNS3 HIST1H4C ANXA1 MMD SSR3 SRP9 FLNB KRT18 HDGF TGFBI KLF10 SGK223" style="cursor: pointer; text-decoration: underline dotted;">14 targets
58	USF2	0.02405	0	0	" title="Overlapping EnrichrTargets" data-content="USF2 targets 36 genes from the input gene list.Associations were determined from the following experiment:The full list of targets is available below:ATF4 EIF1 DUSP1 RNASEK APEX1 LAPTM4A SRSF2 SRSF3 SLC38A2 GAPDH EIF4A1 BSG PCBP1 AIMP2 NANP TXLNG NPM1 ACTG1 DDX5 PLD3 DDX3X LDHA HNRNPM RPL19 NCL ADNP SNRPA MCM7 WIPI1 MYL12A PTDSS1 RPS28 RHOA YBX1 …
59	NR2C2	0.02641	0	0	" title="Overlapping EnrichrTargets" data-content="NR2C2 targets 16 genes from the input gene list.Associations were determined from the following experiment:The full list of targets is available below:RPS14 RPL35 RPL27 PCBP1 PCBP2 RPS25 RPS20 RPS21 RPS15A RANBP1 HDGF COX17 RPS3A SLC25A6 AURKA EIF3M" style="cursor: pointer; text-decoration: underline dotted;">16 targets
60	TRIM28	0.02696	0	0	" title="Overlapping EnrichrTargets" data-content="TRIM28 targets 11 genes from the input gene list.Associations were determined from the following experiment:The full list of targets is available below:EGR1 ID2 SLC7A5 TKT ODC1 HSPA1A IGFBP3 LBR TOP1 SLC3A2 TXNRD1" style="cursor: pointer; text-decoration: underline dotted;">11 targets
61	EGR1	0.03023	0	0	" title="Overlapping EnrichrTargets" data-content="EGR1 targets 22 genes from the input gene list.Associations were determined from the following experiment:The full list of targets is available below:TFRC IER2 IER3 TUBA1A SSR3 RPS2 YTHDF2 GPX4 HNRNPAB DNAJA1 EPAS1 PCBP2 COX5B CD59 HNRNPA2B1 DDX5 UBC HSPA8 CBX3 KLF10 RPS3A TRA2B" style="cursor: pointer; text-decoration: underline dotted;">22 targ…
62	BHLHE40	0.04677	0	0	" title="Overlapping EnrichrTargets" data-content="BHLHE40 targets 15 genes from the input gene list.Associations were determined from the following experiment:The full list of targets is available below:EIF4A1 ENO1 BSG PFN1 HSPH1 CDKN1B SLC7A5 MRPS34 KPNA2 PPIA PLCXD1 SLC38A2 DDX3X KLF10 H2AFZ" style="cursor: pointer; text-decoration: underline dotted;">15 targets
63	HDAC2	0.04701	0	0	" title="Overlapping EnrichrTargets" data-content="HDAC2 targets 9 genes from the input gene list.Associations were determined from the following experiment:The full list of targets is available below:RPS19 ACTN1 ID1 CTCF HINT1 TUBA1B PKM NQO1 YTHDF2" style="cursor: pointer; text-decoration: underline dotted;">9 targets
64	NFE2L2	0.04818	0	0	" title="Overlapping EnrichrTargets" data-content="NFE2L2 targets 36 genes from the input gene list.Associations were determined from the following experiment:The full list of targets is available below:TSKU AREG DUSP1 SRP9 TNFRSF1A MMD COX6C VMP1 MID1 INHBB BMP6 YWHAG SGK223 VCAN PPDPF CRYZ GOLPH3 RPL5 GJA1 SDPR ANXA1 SSR3 TKT RPS15A RPL10A TUBB3 IGFBP3 SRXN1 PKM TXNRD1 C8ORF4 C9ORF3 NQO1 NTS UB…
65	IRF3	0.04911	0	0	" title="Overlapping EnrichrTargets" data-content="IRF3 targets 25 genes from the input gene list.Associations were determined from the following experiment:The full list of targets is available below:MTHFD2 H3F3B CENPA TUBB4B LAPTM4A SNRPA HSP90B1 MCM3 EIF4A1 SNRPD2 RPL18A MANF AIMP2 ID2 ANP32E TOP2A CCT7 RSRC2 COX6B1 TMEM256 FAM83D YBX1 ATP5G1 AURKA HN1" style="cursor: pointer; text-decoration:…
66	STAT5A	0.04936	0	0	" title="Overlapping EnrichrTargets" data-content="STAT5A targets 11 genes from the input gene list.Associations were determined from the following experiment:The full list of targets is available below:MYL12A C12ORF57 EGR1 HIST1H4C PBK CD59 RANBP1 PSMC6 LAPTM4A PKM HIST1H2BK" style="cursor: pointer; text-decoration: underline dotted;">11 targets
67	TCF7L2	0.06176	0	0	" title="Overlapping EnrichrTargets" data-content="TCF7L2 targets 22 genes from the input gene list.Associations were determined from the following experiment:The full list of targets is available below:TSKU DKK1 S100A10 EIF1 SSR2 SLC38A2 SEMA3C REPIN1 MT1X ACTB SNRPD2 EPAS1 PCBP1 PCBP2 ID2 ID1 CCT2 EDN1 C9ORF3 PRPF8 EFNA1 AURKA" style="cursor: pointer; text-decoration: underline dotted;">22 targ…
68	SMAD4	0.06263	0	0	" title="Overlapping EnrichrTargets" data-content="SMAD4 targets 22 genes from the input gene list.Associations were determined from the following experiment:The full list of targets is available below:ALCAM S100A10 KCNMA1 FLNB SERPIND1 S100A2 SLC38A2 CYR61 LBR TNS4 ACTN1 VDAC2 ID1 ID3 EDN1 AMIGO2 CD59 HNRNPA2B1 RGS2 TMOD3 CBX3 CYP24A1" style="cursor: pointer; text-decoration: underline dotted;">…
69	UBTF	0.06394	0	0	" title="Overlapping EnrichrTargets" data-content="UBTF targets 53 genes from the input gene list.Associations were determined from the following experiment:The full list of targets is available below:DUSP1 ZSWIM6 SRSF2 TOP1 HNRNPAB ACTN1 EGR1 XBP1 RAC1 MRPS24 MRPS34 VMP1 ZFAND5 ACTG1 HNRNPK CDKN1B NCOR2 YTHDF2 TUBB4B FKBP4 LBR MCM6 MGME1 PSAT1 RPL36AL MYL12A TMED2 UGDH SELT YBX3 HIST1H2BK ZNF281…
70	FOXA2	0.08045	0	0	" title="Overlapping EnrichrTargets" data-content="FOXA2 targets 13 genes from the input gene list.Associations were determined from the following experiment:The full list of targets is available below:ERRFI1 MT2A KRT8 TM4SF1 ID2 HIST1H4C TK1 DUSP1 TIMM13 KRT18 EFNA1 MCM7 TGFBR2" style="cursor: pointer; text-decoration: underline dotted;">13 targets
71	USF1	0.08608	0	0	" title="Overlapping EnrichrTargets" data-content="USF1 targets 46 genes from the input gene list.Associations were determined from the following experiment:The full list of targets is available below:ATF4 TUBA1B DUSP1 RNASEK APEX1 S100A6 SRSF2 SRSF3 SLC38A2 ETF1 TOP1 GAPDH SLC25A6 NOP56 EIF4A1 EIF4A3 BSG PCBP1 ID2 NANP TXLNG NPM1 ACTG1 DDX5 PLD3 UBE2S DDX3X ENO1 LDHA HNRNPM SSR3 TIMM13 RPL19 NCL…
72	STAT3	0.1024	0	0	" title="Overlapping EnrichrTargets" data-content="STAT3 targets 8 genes from the input gene list.Associations were determined from the following experiment:The full list of targets is available below:MYC ZFP36L1 LDHB ASNS EIF1 ID2 EMP1 ODC1" style="cursor: pointer; text-decoration: underline dotted;">8 targets
73	RFX5	0.1066	0	0	" title="Overlapping EnrichrTargets" data-content="RFX5 targets 20 genes from the input gene list.Associations were determined from the following experiment:The full list of targets is available below:MYC MTHFD2 TUBA1A CKS2 SRSF3 SNRPA PKM DNAJB1 PSAT1 SOX4 SIK1 XBP1 AIMP2 CCT7 UBB UBC DDX3X ATP5G1 TOB1 SCD" style="cursor: pointer; text-decoration: underline dotted;">20 targets
74	RUNX1	0.1247	0	0	" title="Overlapping EnrichrTargets" data-content="RUNX1 targets 41 genes from the input gene list.Associations were determined from the following experiment:The full list of targets is available below:MTHFD2 TUBA1C DUSP1 DYNLL1 CKS2 S100A6 LY6E SLC38A2 EGR1 ID2 ID3 CALM1 CCT7 NPM1 HDGF TMOD3 PPIB DDX3X SLC3A2 CYP24A1 ENO1 IER2 LDHB S100A10 CDKN1B TKT TUBB4B FAM107B RPS9 SNRPA MCM7 LBR DNAJB1 TNS…
75	TP53	0.1426	0	0	" title="Overlapping EnrichrTargets" data-content="TP53 targets 12 genes from the input gene list.Associations were determined from the following experiment:The full list of targets is available below:RPS19 ACTN1 SDPR RRAD PLK2 KCNMA1 PCNA TUBB4B S100A2 ALDH3A1 NPR3 VIM" style="cursor: pointer; text-decoration: underline dotted;">12 targets
76	HNF4A	0.233	0	0	" title="Overlapping EnrichrTargets" data-content="HNF4A targets 38 genes from the input gene list.Associations were determined from the following experiment:The full list of targets is available below:CYB5R3 FAM136A SLC7A5 ARF6 ODC1 LAPTM4A KPNA2 SLC25A6 CYB5A ACTN4 ID1 CALM1 MRPS24 CAMK2N1 VMP1 TMEM256 COX17 AURKA GOLPH3 DKK1 RPL27 TK1 TIMM13 SERPIND1 TUBB4B TNS3 HIST1H4C UGDH RANBP1 UBC FAM83D…
77	POU5F1	0.2546	0	0	" title="Overlapping EnrichrTargets" data-content="POU5F1 targets 9 genes from the input gene list.Associations were determined from the following experiment:The full list of targets is available below:ENO1 GJA1 DKK1 ID2 ADNP ZFP36L1 UBB HSP90AA1 SCD" style="cursor: pointer; text-decoration: underline dotted;">9 targets
78	ZC3H11A	0.2583	0	0	" title="Overlapping EnrichrTargets" data-content="ZC3H11A targets 5 genes from the input gene list.Associations were determined from the following experiment:The full list of targets is available below:MYC IGFBP4 COX17 PPDPF TRA2B" style="cursor: pointer; text-decoration: underline dotted;">5 targets
79	MYOD1	0.2772	0	0	" title="Overlapping EnrichrTargets" data-content="MYOD1 targets 6 genes from the input gene list.Associations were determined from the following experiment:The full list of targets is available below:CDC25B TRIM16 ATF4 TUBA1B KLF10 TUBB2B" style="cursor: pointer; text-decoration: underline dotted;">6 targets
80	SUZ12	0.3038	0	0	" title="Overlapping EnrichrTargets" data-content="SUZ12 targets 4 genes from the input gene list.Associations were determined from the following experiment:The full list of targets is available below:EPAS1 NPR3 BNC1 CYP24A1" style="cursor: pointer; text-decoration: underline dotted;">4 targets
81	SIX5	0.3564	0	0	" title="Overlapping EnrichrTargets" data-content="SIX5 targets 31 genes from the input gene list.Associations were determined from the following experiment:The full list of targets is available below:HSPH1 ACLY SRSF2 HSP90B1 TRIM16 COX7B TCEB1 TMOD3 GEMIN6 HIGD2A DDX47 YWHAG RPL32 RPL8 PHB2 RPL6 ZNF146 PHF23 SSR2 SSR3 RPL12 TIMM13 RPS3 RPS7 MORF4L1 RPL18A RPS11 RPS20 SERP1 XPOT EIF2S2" style="cu…
82	TP63	0.371	0	0	" title="Overlapping EnrichrTargets" data-content="TP63 targets 39 genes from the input gene list.Associations were determined from the following experiment:The full list of targets is available below:ZNF281 RPLP1 EMP2 GSTP1 CENPA PFKFB3 ETF1 TOP1 HNRNPAB ERRFI1 EPAS1 PCBP2 EGR1 ID2 RAC1 KIF23 PLAT PPIA CNN3 HIGD2A ENO1 ALCAM IER3 TGFB1I1 TK1 ANXA1 ANXA2 TMSB10 BNC1 LBR GPX2 PKM PFKP KRT8 CBR1 ED…
83	SMC3	0.3805	0	0	" title="Overlapping EnrichrTargets" data-content="SMC3 targets 33 genes from the input gene list.Associations were determined from the following experiment:The full list of targets is available below:POP7 FAM136A MRPL23 DUSP1 SRP9 FLNB RRAD EGR1 XBP1 ID2 MRPS34 NPR3 MYC CPED1 RRS1 PLK2 SLC16A14 RARS RPL11 IGFBP4 IGFBP3 ERP27 ADNP PTBP3 SEMA3C SIK1 NCEH1 EDN1 BASP1 NTS FAM83D NFKBIA H2AFZ" style=…
84	IRF1	0.3896	0	0	" title="Overlapping EnrichrTargets" data-content="IRF1 targets 8 genes from the input gene list.Associations were determined from the following experiment:The full list of targets is available below:MT2A COX7B TCEB1 TMSB10 DDX3X YWHAG SLC3A2 DNAJA1" style="cursor: pointer; text-decoration: underline dotted;">8 targets
85	ZKSCAN1	0.3909	0	0	" title="Overlapping EnrichrTargets" data-content="ZKSCAN1 targets 4 genes from the input gene list.Associations were determined from the following experiment:The full list of targets is available below:PLCXD1 LPCAT1 ANXA2 TKT" style="cursor: pointer; text-decoration: underline dotted;">4 targets
86	FOXA1	0.4535	0	0	" title="Overlapping EnrichrTargets" data-content="FOXA1 targets 6 genes from the input gene list.Associations were determined from the following experiment:The full list of targets is available below:KRT8 MYL12A KRT18 MCM7 PPDPF POLR2L" style="cursor: pointer; text-decoration: underline dotted;">6 targets
87	FOXP2	0.5031	0	0	" title="Overlapping EnrichrTargets" data-content="FOXP2 targets 5 genes from the input gene list.Associations were determined from the following experiment:The full list of targets is available below:IER2 RPL27 PCBP2 MCM7 POLR2L" style="cursor: pointer; text-decoration: underline dotted;">5 targets
88	ZEB1	0.53	0	0	" title="Overlapping EnrichrTargets" data-content="ZEB1 targets 3 genes from the input gene list.Associations were determined from the following experiment:The full list of targets is available below:HIST1H4C CYB5A GOLPH3" style="cursor: pointer; text-decoration: underline dotted;">3 targets
89	ATF3	0.5781	0	0	" title="Overlapping EnrichrTargets" data-content="ATF3 targets 3 genes from the input gene list.Associations were determined from the following experiment:The full list of targets is available below:PLD3 EIF2S2 TIMM13" style="cursor: pointer; text-decoration: underline dotted;">3 targets
90	CBX3	0.63	0	0	" title="Overlapping EnrichrTargets" data-content="CBX3 targets 2 genes from the input gene list.Associations were determined from the following experiment:The full list of targets is available below:ADNP COX16" style="cursor: pointer; text-decoration: underline dotted;">2 targets
91	GATA2	0.643	0	0	" title="Overlapping EnrichrTargets" data-content="GATA2 targets 19 genes from the input gene list.Associations were determined from the following experiment:The full list of targets is available below:TUBA1C SLC7A5 TNFRSF1A ERRFI1 ACTN4 CRIP1 CD59 HDGF MAT2A IER2 RPS9 BNC1 PKM MCM3 HINT1 EDN1 KRT18 FBL COTL1" style="cursor: pointer; text-decoration: underline dotted;">19 targets
92	YY1	0.6431	0	0	" title="Overlapping EnrichrTargets" data-content="YY1 targets 8 genes from the input gene list.Associations were determined from the following experiment:The full list of targets is available below:RPL4 RPL34 RPS28 RPL18 MORF4L1 UQCRB UBB DDX47" style="cursor: pointer; text-decoration: underline dotted;">8 targets
93	EGR1	0.7194	0	0	" title="Overlapping EnrichrTargets" data-content="EGR1 targets 7 genes from the input gene list.Associations were determined from the following experiment:The full list of targets is available below:ACTN4 EGR1 TNFRSF12A TXLNG NT5E YTHDF2 HSPA1A" style="cursor: pointer; text-decoration: underline dotted;">7 targets
94	RAD21	0.7404	0	0	" title="Overlapping EnrichrTargets" data-content="RAD21 targets 30 genes from the input gene list.Associations were determined from the following experiment:The full list of targets is available below:POP7 C12ORF57 FAM136A DUSP1 SRP9 FLNB PCNA PPIB CRYZ MYC CPED1 RPL27 C1ORF194 RRS1 PLK2 RARS NCOR2 RPL10A IGFBP3 ADNP RPL18A MYL12A NCEH1 EDN1 AMIGO2 BASP1 NTS FAM83D NR4A1 H2AFZ" style="cursor: po…
95	EZH2	0.7443	0	0	" title="Overlapping EnrichrTargets" data-content="EZH2 targets 5 genes from the input gene list.Associations were determined from the following experiment:The full list of targets is available below:CD24 TESC COL4A2 INHBB CYP24A1" style="cursor: pointer; text-decoration: underline dotted;">5 targets
96	AR	0.7878	0	0	" title="Overlapping EnrichrTargets" data-content="AR targets 25 genes from the input gene list.Associations were determined from the following experiment:The full list of targets is available below:MTHFD1 RPLP1 SRP9 CYB5A ERRFI1 CALM1 C14ORF2 KIF23 CAV1 INHBB VCAN SLC16A14 FAM107B TXNRD1 PSAT1 TNS3 C9ORF3 CA12 XPOT FBL ZFP36L1 EFNA1 KYNU H2AFZ ALDH1A1" style="cursor: pointer; text-decoration: un…
97	IRF8	0.826	0	0	" title="Overlapping EnrichrTargets" data-content="IRF8 targets 2 genes from the input gene list.Associations were determined from the following experiment:The full list of targets is available below:HSP90AB1 KYNU" style="cursor: pointer; text-decoration: underline dotted;">2 targets
98	VDR	0.8643	0	0	" title="Overlapping EnrichrTargets" data-content="VDR targets 1 genes from the input gene list.Associations were determined from the following experiment:The full list of targets is available below:NFKBIA" style="cursor: pointer; text-decoration: underline dotted;">1 targets
99	REST	0.952	0	0	" title="Overlapping EnrichrTargets" data-content="REST targets 25 genes from the input gene list.Associations were determined from the following experiment:The full list of targets is available below:RPLP1 FLNB TOP1 EIF3M ACTN4 CALM1 NPM1 PLAT CCNB2 INHBB ADM RPS15A TUBB3 ASNS SRXN1 BNC1 TXNRD1 SOX4 C8ORF4 SIK1 MANF EDN1 GNB2L1 NR4A1 FGG" style="cursor: pointer; text-decoration: underline dotted…
100	SUZ12	0.9577	0	0	" title="Overlapping EnrichrTargets" data-content="SUZ12 targets 34 genes from the input gene list.Associations were determined from the following experiment:The full list of targets is available below:EPAS1 RRAD EGR3 CAV1 ALCAM CYR61 EDN1 AMIGO2 NT5E KCNMA1 ID3 CD24 PTPRO RGS2 NPR3 INHBB BMP6 VCAN CYP24A1 DKK1 CPED1 SLC16A14 ADM TESC IGFBP4 IGFBP3 BNC1 SEMA3C SOX4 COL4A2 TGFBR1 TGFBR2 HPGD PON2"…
101	EZH2	0.9768	0	0	" title="Overlapping EnrichrTargets" data-content="EZH2 targets 4 genes from the input gene list.Associations were determined from the following experiment:The full list of targets is available below:CXADR C1ORF194 H3F3B COX16" style="cursor: pointer; text-decoration: underline dotted;">4 targets
102	ERG	0.9769	0	0	" title="Overlapping EnrichrTargets" data-content="ERG targets 1 genes from the input gene list.Associations were determined from the following experiment:The full list of targets is available below:TKT" style="cursor: pointer; text-decoration: underline dotted;">1 targets
103	GATA1	0.9788	0	0	" title="Overlapping EnrichrTargets" data-content="GATA1 targets 13 genes from the input gene list.Associations were determined from the following experiment:The full list of targets is available below:TFRC SLC7A5 ERRFI1 ACTB BSG ID2 CRIP1 COX16 LBR ANP32E HINT1 COL4A2 ALDH2" style="cursor: pointer; text-decoration: underline dotted;">13 targets
104	REST	0.9974	0	0	" title="Overlapping EnrichrTargets" data-content="REST targets 3 genes from the input gene list.Associations were determined from the following experiment:The full list of targets is available below:TFRC TMED2 TKT" style="cursor: pointer; text-decoration: underline dotted;">3 targets
KEA
Rank	Protein Kinase	Hypergeometric p-value	Z-score	Combined score	Enriched Substrates
1	CSNK2A1	1.298e-27	0	0	" title="Overlapping EnrichrSubstrates" data-content="CSNK2A1 targets 74 genes from the input gene list.The full list of substrates is available below:ATF2 CSNK2A1 JUN EZH2 NELFE FOS SIRT1 STAT1 ATAD2 YY1 PIM1 PIAS1 MSH2 MAX PIN1 SUMO1 SUMO2 HSP90AA1 ARNT IFI16 E2F1 CCNH CSNK2B SMARCA4 BRCA1 NCOA2 NCOA3 RELA UBE3A CCND1 TFAP2A VDR GSK3B CCNA2 AURKA VHL TAF7 RB1 TRRAP MYC JUNB HIF1A HNRNPD CDK16 T…
2	CDK1	1.141e-26	0	0	" title="Overlapping EnrichrSubstrates" data-content="CDK1 targets 76 genes from the input gene list.The full list of substrates is available below:ATF2 CSNK2A1 JUN EZH2 NELFE FOS SIRT1 STAT1 ATAD2 CCNT1 PIM1 MSH2 SP1 NFE2L2 HSP90AA1 E2F1 E2F4 CSNK2B SMARCA4 TP73 BRCA1 NCOA2 NCOA6 NCOA3 XIAP RELA MRE11A UBE3A CCND1 GSK3B CCNA2 AURKA VHL TAF1 RB1 TRRAP HNRNPU MYC JUNB HIF1A HNRNPD NCOR1 RARA CDKN2…
3	MAPK14	5.998e-25	0	0	" title="Overlapping EnrichrSubstrates" data-content="MAPK14 targets 58 genes from the input gene list.The full list of substrates is available below:ATF2 JUN EZH2 NELFE FOS STAT1 ATAD2 YY1 PIM1 MSH2 SP1 NFE2L2 HSP90AA1 IFI16 E2F1 CSNK2B SMARCA4 BRCA1 NCOA2 NCOA3 RELA CCND1 GSK3B CCNA2 AURKA VHL RB1 TRRAP HNRNPU MYC JUNB HIF1A TERF2 NCOR1 CDKN2A GTF2I CDK2 BCL2 CDK1 CEBPA CEBPB POLR2A RBBP4 RAD51…
4	CDK2	1.424e-24	0	0	" title="Overlapping EnrichrSubstrates" data-content="CDK2 targets 87 genes from the input gene list.The full list of substrates is available below:ATF2 JUN FOS ATAD2 MSH2 SP1 E2F1 E2F4 TP63 CSNK2B SMARCA4 TP73 MRE11A UBE3A TFAP2A HNRNPU HNRNPD TERF2 CDKN2A GTF2I BCL2 CEBPB HDAC2 POLR2A PML KAT5 TP53BP1 TUBB MLH1 FANCD2 TOPBP1 H2AFX RBL2 RBL1 MAPK8 MAPK1 EZH2 NELFB NELFE STAT1 CCNT1 YY1 RUVBL2 PI…
5	ATM	1.478e-22	0	0	" title="Overlapping EnrichrSubstrates" data-content="ATM targets 35 genes from the input gene list.The full list of substrates is available below:RB1 ATF2 SMARCB1 HNRNPU CCAR2 KAT5 CHEK2 TP63 HIF1A TP53BP1 SMARCA4 ATM EZH2 BRCA1 TERF2 ATAD2 HUWE1 MRE11A MLH1 NBN MSH2 FANCD2 ABL1 SP1 CDK2 CDK1 TOPBP1 HSP90AA1 H2AFX CCNA2 RBL2 RBL1 E2F1 VHL RAD51" style="cursor: pointer; text-decoration: underline…
6	GSK3B	9.874e-19	0	0	" title="Overlapping EnrichrSubstrates" data-content="GSK3B targets 73 genes from the input gene list.The full list of substrates is available below:ATF2 JUN FOS ATAD2 PIAS1 MSH2 SP1 E2F1 TRIM24 TP63 CSNK2B SMARCA4 TP73 RELA UBE3A ETS1 HNRNPD NCOR1 CDKN2A GTF2I BCL2 HDAC4 CEBPA CEBPB CEBPD POLR2A PML KAT5 TP53BP1 TUBB FANCD2 TOPBP1 RBL2 RBL1 MAPK8 MAPK1 EZH2 SIRT1 STAT1 CCNT1 PIM1 NFKB2 NFE2L2 CC…
7	CDK4	2.488e-17	0	0	" title="Overlapping EnrichrSubstrates" data-content="CDK4 targets 24 genes from the input gene list.The full list of substrates is available below:RB1 ATF2 CCNH TRRAP CCND1 MYC SKP2 MAX SMAD2 JUN SMAD3 CDK7 SP1 CDK2 BCL2 BRCA1 SUMO1 HSP90AA1 CCNA2 RBL2 RBL1 CEBPA CEBPB CDKN2A" style="cursor: pointer; text-decoration: underline dotted;">24 substrates
8	MAPK1	5.41e-17	0	0	" title="Overlapping EnrichrSubstrates" data-content="MAPK1 targets 42 genes from the input gene list.The full list of substrates is available below:RB1 ATF2 MYC JUNB CSNK2A1 HIF1A JUN EZH2 FOS TERF2 CDKN2A STAT1 PIM1 GTF2I ABL1 SP1 CDK2 BCL2 CDK1 CEBPA CEBPB CEBPD IFI16 POLR2A PML CCAR2 SKP2 TP53BP1 BRCA1 NCOA2 NCOA6 TUBB RELA ETS1 CCND1 SMAD2 SMAD4 SMAD3 GSK3B RBL2 MAPK8 MAPK1" style="cursor: p…
9	CDC2	5.808e-16	0	0	" title="Overlapping EnrichrSubstrates" data-content="CDC2 targets 30 genes from the input gene list.The full list of substrates is available below:RB1 CCNH KAT5 MYC SKP2 CSNK2A1 TP53BP1 JUN ATM ATR EZH2 TP73 BRCA1 FOS NCOR1 XIAP RELA NFYA ATAD2 CCND1 NBN GTF2I ABL1 CDK7 BCL2 CDK1 CCNA2 RBL2 RBL1 E2F1" style="cursor: pointer; text-decoration: underline dotted;">30 substrates
10	DNAPK	5.66e-15	0	0	" title="Overlapping EnrichrSubstrates" data-content="DNAPK targets 20 genes from the input gene list.The full list of substrates is available below:TRRAP KAT5 CHEK2 NBN ABL1 TP53BP1 SMAD2 JUN SMAD4 SP1 ATM BRCA1 TOPBP1 HSP90AA1 NCOA6 H2AFX RELA MAPK8 MRE11A RAD51" style="cursor: pointer; text-decoration: underline dotted;">20 substrates
11	CK2ALPHA	2.555e-13	0	0	" title="Overlapping EnrichrSubstrates" data-content="CK2ALPHA targets 25 genes from the input gene list.The full list of substrates is available below:RB1 ATF2 CCNH MYC CSNK2B JUN SMARCA4 BRCA1 RELA UBE3A YY1 MAX VDR SP1 CDK1 SUMO1 HSP90AA1 ARNT HDAC4 HDAC2 HDAC3 IFI16 RBBP4 PML TAF1" style="cursor: pointer; text-decoration: underline dotted;">25 substrates
12	ATR	4.594e-13	0	0	" title="Overlapping EnrichrSubstrates" data-content="ATR targets 19 genes from the input gene list.The full list of substrates is available below:CCAR2 CHEK2 NBN MSH2 FANCD2 ABL1 CDK9 SP1 ATM ATR BRCA1 TOPBP1 H2AFX E2F1 CDKN2A HUWE1 MRE11A MLH1 PML" style="cursor: pointer; text-decoration: underline dotted;">19 substrates
13	ERK1	5.772e-12	0	0	" title="Overlapping EnrichrSubstrates" data-content="ERK1 targets 20 genes from the input gene list.The full list of substrates is available below:ATF2 ETS1 KAT5 MYC JUNB GTF2I HIF1A SMAD2 JUN SMAD4 SMAD3 SP1 BCL2 JAK1 FOS HDAC4 CEBPB RELA MAPK8 STAT1" style="cursor: pointer; text-decoration: underline dotted;">20 substrates
14	MAPK3	8.199e-12	0	0	" title="Overlapping EnrichrSubstrates" data-content="MAPK3 targets 26 genes from the input gene list.The full list of substrates is available below:ATF2 MYC JUNB JUN NCOA2 FOS STAT1 ETS1 CCND1 GTF2I ABL1 SMAD2 SMAD4 SMAD3 SP1 CDK2 BCL2 CDK1 GSK3B CEBPA CEBPB MAPK8 POLR2A E2F4 MAPK3 PML" style="cursor: pointer; text-decoration: underline dotted;">26 substrates
15	ABL1	8.65e-12	0	0	" title="Overlapping EnrichrSubstrates" data-content="ABL1 targets 20 genes from the input gene list.The full list of substrates is available below:RB1 UBE3A CCAR2 CCND1 KAT5 MYC JUNB TP63 ABL1 JUN BCL2 ATR TP73 NCOA3 FOS DDB1 CEBPB HDAC2 STAT1 RAD51" style="cursor: pointer; text-decoration: underline dotted;">20 substrates
16	PRKDC	9.596e-12	0	0	" title="Overlapping EnrichrSubstrates" data-content="PRKDC targets 17 genes from the input gene list.The full list of substrates is available below:TRRAP HNRNPU CHEK2 MYC SKP2 JUNB NFKB2 ATM BRCA1 TOPBP1 HSP90AA1 H2AFX RELA MAPK8 POLR2A HUWE1 RAD51" style="cursor: pointer; text-decoration: underline dotted;">17 substrates
17	CSNK2A2	3.608e-11	0	0	" title="Overlapping EnrichrSubstrates" data-content="CSNK2A2 targets 18 genes from the input gene list.The full list of substrates is available below:CCNH TRRAP CCND1 MYC JUNB CSNK2B JUN CDK2 BCL2 CDK1 HNRNPD BRCA1 NELFE TUBB FOS CCNA2 RPL11 STAT1" style="cursor: pointer; text-decoration: underline dotted;">18 substrates
18	MAPK8	4.517e-11	0	0	" title="Overlapping EnrichrSubstrates" data-content="MAPK8 targets 22 genes from the input gene list.The full list of substrates is available below:ATF2 MYC JUNB JUN NCOA3 TUBB FOS SIRT1 RARA SUZ12 CDKN2A STAT1 CCND1 GTF2I TFAP2A SP1 BCL2 CDK1 NFE2L2 H2AFX RBL2 MAPK1" style="cursor: pointer; text-decoration: underline dotted;">22 substrates
19	JNK1	4.544e-10	0	0	" title="Overlapping EnrichrSubstrates" data-content="JNK1 targets 14 genes from the input gene list.The full list of substrates is available below:ATF2 MYC JUNB FOS SIRT1 HIF1A RELA MAPK8 E2F1 SMAD2 JUN SMAD3 SP1 BCL2" style="cursor: pointer; text-decoration: underline dotted;">14 substrates
20	AKT1	5.047e-10	0	0	" title="Overlapping EnrichrSubstrates" data-content="AKT1 targets 24 genes from the input gene list.The full list of substrates is available below:TRRAP MYC JUNB CSNK2A1 JUN EZH2 BRCA1 FOS NCOR1 RARA XIAP CDKN2A STAT1 GTF2F1 PIAS2 ABL1 SMAD4 SMAD3 SP1 CDK2 BCL2 GSK3B TOPBP1 MAPK1" style="cursor: pointer; text-decoration: underline dotted;">24 substrates
21	ERK2	1.248e-09	0	0	" title="Overlapping EnrichrSubstrates" data-content="ERK2 targets 17 genes from the input gene list.The full list of substrates is available below:RB1 ATF2 ETS1 MYC JUNB SMAD2 JUN SMAD4 SMAD3 SP1 BCL2 NCOA3 FOS HDAC4 CEBPB RELA STAT1" style="cursor: pointer; text-decoration: underline dotted;">17 substrates
22	CDK7	9.042e-09	0	0	" title="Overlapping EnrichrSubstrates" data-content="CDK7 targets 12 genes from the input gene list.The full list of substrates is available below:CCNH BRCA1 GTF2F1 CCNA2 RARA XIAP POLR2A E2F1 CDK9 CDK7 CDK2 CDK1" style="cursor: pointer; text-decoration: underline dotted;">12 substrates
23	HIPK2	1.412e-08	0	0	" title="Overlapping EnrichrSubstrates" data-content="HIPK2 targets 15 genes from the input gene list.The full list of substrates is available below:MYC TP63 HIF1A SMAD2 SMAD3 SIAH2 BCL2 SUMO1 SIRT1 NCOR1 HDAC4 CEBPB RELA MAPK8 PML" style="cursor: pointer; text-decoration: underline dotted;">15 substrates
24	CHEK1	2.339e-08	0	0	" title="Overlapping EnrichrSubstrates" data-content="CHEK1 targets 18 genes from the input gene list.The full list of substrates is available below:RB1 MYC SKP2 CSNK2B TP53BP1 EZH2 TP73 BRCA1 NELFE TUBB FOS FANCD2 CDK1 TOPBP1 H2AFX CCNA2 E2F1 E2F4" style="cursor: pointer; text-decoration: underline dotted;">18 substrates
25	RPS6KA3	1.305e-06	0	0	" title="Overlapping EnrichrSubstrates" data-content="RPS6KA3 targets 18 genes from the input gene list.The full list of substrates is available below:TRRAP MYC JUNB CSNK2B JUN TUBB FOS KAT2B CDKN2A STAT1 CCND1 SMAD3 BCL2 CDK1 GSK3B CCNA2 RBL2 MAPK3" style="cursor: pointer; text-decoration: underline dotted;">18 substrates
26	JNK2	1.716e-06	0	0	" title="Overlapping EnrichrSubstrates" data-content="JNK2 targets 7 genes from the input gene list.The full list of substrates is available below:RB1 ATF2 RELA MYC SMAD2 JUN FOS" style="cursor: pointer; text-decoration: underline dotted;">7 substrates
27	PLK1	3.347e-06	0	0	" title="Overlapping EnrichrSubstrates" data-content="PLK1 targets 17 genes from the input gene list.The full list of substrates is available below:HNRNPU CHEK2 MYC TP53BP1 TP73 BRCA1 SUZ12 ATAD2 CCNT1 YY1 FANCD2 CDK1 PIN1 TOPBP1 CCNA2 AURKA RAD51" style="cursor: pointer; text-decoration: underline dotted;">17 substrates
28	GSK3BETA	6.519e-06	0	0	" title="Overlapping EnrichrSubstrates" data-content="GSK3BETA targets 12 genes from the input gene list.The full list of substrates is available below:CCND1 MYC JUN SMAD3 BCL2 HNRNPD PIN1 GSK3B RBL2 CEBPB AURKA E2F1" style="cursor: pointer; text-decoration: underline dotted;">12 substrates
29	PRKACA	6.567e-06	0	0	" title="Overlapping EnrichrSubstrates" data-content="PRKACA targets 36 genes from the input gene list.The full list of substrates is available below:JUN FOS DDB1 PIN1 HSP90AA1 IFI16 NCOA3 RELA UBE3A ETS1 CCND1 TFAP2A VDR GSK3B CCNA2 AURKA RB1 MYC JUNB HIF1A HNRNPD CDK16 NCOR1 RARA CDKN2A GTF2I ABL1 BCL2 CDK1 CEBPB ATR TUBB SMAD4 SMAD3 RBL2 MAPK1" style="cursor: pointer; text-decoration: underlin…
30	MAPK11	6.626e-06	0	0	" title="Overlapping EnrichrSubstrates" data-content="MAPK11 targets 11 genes from the input gene list.The full list of substrates is available below:ATF2 ABL1 JUN BCL2 JAK1 FOS CEBPB E2F1 STAT1 PML MAPK11" style="cursor: pointer; text-decoration: underline dotted;">11 substrates
31	CSNK1E	1.137e-05	0	0	" title="Overlapping EnrichrSubstrates" data-content="CSNK1E targets 8 genes from the input gene list.The full list of substrates is available below:CCND1 MYC NCOA3 TUBB CDKN2A STAT1 SIAH2 SMARCA4" style="cursor: pointer; text-decoration: underline dotted;">8 substrates
32	AURORAA	1.188e-05	0	0	" title="Overlapping EnrichrSubstrates" data-content="AURORAA targets 9 genes from the input gene list.The full list of substrates is available below:GSK3B BRCA1 CCND1 NCOA3 CCNA2 NCOR1 HDAC3 AURKA CDK1" style="cursor: pointer; text-decoration: underline dotted;">9 substrates
33	PRKCZ	1.299e-05	0	0	" title="Overlapping EnrichrSubstrates" data-content="PRKCZ targets 9 genes from the input gene list.The full list of substrates is available below:GSK3B JAK1 PIAS4 NCOA3 RELA MAPK1 MAPK3 SP1 PIN1" style="cursor: pointer; text-decoration: underline dotted;">9 substrates
34	RAF1	1.336e-05	0	0	" title="Overlapping EnrichrSubstrates" data-content="RAF1 targets 11 genes from the input gene list.The full list of substrates is available below:RB1 MYC JUNB BCL2 PIN1 JAK1 HSP90AA1 FOS RBL2 MAPK1 MAPK3" style="cursor: pointer; text-decoration: underline dotted;">11 substrates
35	CHUK	1.42e-05	0	0	" title="Overlapping EnrichrSubstrates" data-content="CHUK targets 9 genes from the input gene list.The full list of substrates is available below:CCND1 MYC BTRC NCOA3 TUBB PIAS1 NCOR1 RELA NFKB2" style="cursor: pointer; text-decoration: underline dotted;">9 substrates
36	CDK5	1.452e-05	0	0	" title="Overlapping EnrichrSubstrates" data-content="CDK5 targets 13 genes from the input gene list.The full list of substrates is available below:RB1 CCAR2 MYC HIF1A ABL1 CDK7 BCL2 ATM CDK16 NFE2L2 GSK3B BRCA1 CCNA2" style="cursor: pointer; text-decoration: underline dotted;">13 substrates
37	CDK3	2.116e-05	0	0	" title="Overlapping EnrichrSubstrates" data-content="CDK3 targets 6 genes from the input gene list.The full list of substrates is available below:RB1 CCNH E2F1 JUN CCNA2 CDK2" style="cursor: pointer; text-decoration: underline dotted;">6 substrates
38	CK2	2.12e-05	0	0	" title="Overlapping EnrichrSubstrates" data-content="CK2 targets 8 genes from the input gene list.The full list of substrates is available below:HSP90AA1 HDAC2 MAX RELA IFI16 JUN VDR CDK1" style="cursor: pointer; text-decoration: underline dotted;">8 substrates
39	PRKCA	2.202e-05	0	0	" title="Overlapping EnrichrSubstrates" data-content="PRKCA targets 32 genes from the input gene list.The full list of substrates is available below:ATF2 JUN FOS STAT1 ATAD2 PIM1 NFE2L2 IFI16 TP73 RELA MNT CCND1 VDR GSK3B CCNA2 AURKA RB1 MYC JUNB HNRNPD NCOR1 CDKN2A ABL1 CDK9 BCL2 CDK1 CEBPB ATM TUBB SMAD3 RBL2 MAPK1" style="cursor: pointer; text-decoration: underline dotted;">32 substrates
40	CHEK2	2.493e-05	0	0	" title="Overlapping EnrichrSubstrates" data-content="CHEK2 targets 7 genes from the input gene list.The full list of substrates is available below:RB1 BRCA1 CHEK2 E2F1 VHL SIAH2 PML" style="cursor: pointer; text-decoration: underline dotted;">7 substrates
41	CDK9	3.361e-05	0	0	" title="Overlapping EnrichrSubstrates" data-content="CDK9 targets 6 genes from the input gene list.The full list of substrates is available below:RB1 CCNT1 POLR2A NCOA2 SMAD3 CDK9" style="cursor: pointer; text-decoration: underline dotted;">6 substrates
42	MAP3K7	4.397e-05	0	0	" title="Overlapping EnrichrSubstrates" data-content="MAP3K7 targets 9 genes from the input gene list.The full list of substrates is available below:HNRNPU RUVBL2 SMAD3 HIST1H4A HSP90AA1 TUBB HDAC4 E2F1 E2F4" style="cursor: pointer; text-decoration: underline dotted;">9 substrates
43	PKBALPHA	5.772e-05	0	0	" title="Overlapping EnrichrSubstrates" data-content="PKBALPHA targets 13 genes from the input gene list.The full list of substrates is available below:MYC SKP2 EZH2 BRCA1 JAK1 RARA XIAP RELA SMAD2 SMAD3 GSK3B TOPBP1 HSP90AA1" style="cursor: pointer; text-decoration: underline dotted;">13 substrates
44	MAPK9	0.000136	0	0	" title="Overlapping EnrichrSubstrates" data-content="MAPK9 targets 8 genes from the input gene list.The full list of substrates is available below:ATF2 CCND1 MYC JUNB H2AFX FOS CCNA2 JUN" style="cursor: pointer; text-decoration: underline dotted;">8 substrates
45	CDK8	0.0001494	0	0	" title="Overlapping EnrichrSubstrates" data-content="CDK8 targets 5 genes from the input gene list.The full list of substrates is available below:CCNH E2F1 TOPBP1 SMAD3 STAT1" style="cursor: pointer; text-decoration: underline dotted;">5 substrates
46	GSK	0.0001494	0	0	" title="Overlapping EnrichrSubstrates" data-content="GSK targets 5 genes from the input gene list.The full list of substrates is available below:CEBPB RELA CCND1 MYC HNRNPD" style="cursor: pointer; text-decoration: underline dotted;">5 substrates
47	IKK	0.0002018	0	0	" title="Overlapping EnrichrSubstrates" data-content="IKK targets 3 genes from the input gene list.The full list of substrates is available below:CCND1 RELA NFKB2" style="cursor: pointer; text-decoration: underline dotted;">3 substrates
48	SRC	0.0002274	0	0	" title="Overlapping EnrichrSubstrates" data-content="SRC targets 19 genes from the input gene list.The full list of substrates is available below:RB1 MYC JUNB JUN JAK1 FOS STAT1 GTF2I ABL1 BCL2 CDK1 CEBPB IFI16 E2F4 TUBB CCND1 SMAD3 AURKA MAPK1" style="cursor: pointer; text-decoration: underline dotted;">19 substrates
49	MAP2K1	0.0002309	0	0	" title="Overlapping EnrichrSubstrates" data-content="MAP2K1 targets 7 genes from the input gene list.The full list of substrates is available below:GSK3B CCND1 MYC FOS MAPK8 MAPK1 MAPK3" style="cursor: pointer; text-decoration: underline dotted;">7 substrates
50	TGFBR2	0.0002309	0	0	" title="Overlapping EnrichrSubstrates" data-content="TGFBR2 targets 7 genes from the input gene list.The full list of substrates is available below:MYC HSP90AA1 SMAD2 SMAD3 MLH1 PML SP1" style="cursor: pointer; text-decoration: underline dotted;">7 substrates
51	AURKB	0.0002496	0	0	" title="Overlapping EnrichrSubstrates" data-content="AURKB targets 10 genes from the input gene list.The full list of substrates is available below:RB1 YY1 FANCD2 TP53BP1 CDK1 PIN1 ATM NELFE CCNA2 AURKA" style="cursor: pointer; text-decoration: underline dotted;">10 substrates
52	CHK2	0.0002992	0	0	" title="Overlapping EnrichrSubstrates" data-content="CHK2 targets 3 genes from the input gene list.The full list of substrates is available below:CHEK2 E2F1 BRCA1" style="cursor: pointer; text-decoration: underline dotted;">3 substrates
53	TTK	0.0003457	0	0	" title="Overlapping EnrichrSubstrates" data-content="TTK targets 8 genes from the input gene list.The full list of substrates is available below:CHEK2 ABL1 CDK2 CDK1 HSP90AA1 AURKA E2F1 E2F4" style="cursor: pointer; text-decoration: underline dotted;">8 substrates
54	MAPK10	0.0003711	0	0	" title="Overlapping EnrichrSubstrates" data-content="MAPK10 targets 6 genes from the input gene list.The full list of substrates is available below:MYC JUNB FOS JUN CDKN2A BCL2" style="cursor: pointer; text-decoration: underline dotted;">6 substrates
55	IKBKE	0.0004195	0	0	" title="Overlapping EnrichrSubstrates" data-content="IKBKE targets 7 genes from the input gene list.The full list of substrates is available below:BTRC SKP1 TUBB CUL1 XIAP RELA STAT1" style="cursor: pointer; text-decoration: underline dotted;">7 substrates
56	AURKA	0.0005158	0	0	" title="Overlapping EnrichrSubstrates" data-content="AURKA targets 7 genes from the input gene list.The full list of substrates is available below:GSK3B BRCA1 CCNA2 AURKA VHL PIN1 TP73" style="cursor: pointer; text-decoration: underline dotted;">7 substrates
57	ERBB2	0.0005225	0	0	" title="Overlapping EnrichrSubstrates" data-content="ERBB2 targets 8 genes from the input gene list.The full list of substrates is available below:ETS1 CCND1 CDK1 JAK1 HSP90AA1 NCOA3 NCOR1 STAT1" style="cursor: pointer; text-decoration: underline dotted;">8 substrates
58	PRKCD	0.0006654	0	0	" title="Overlapping EnrichrSubstrates" data-content="PRKCD targets 9 genes from the input gene list.The full list of substrates is available below:JUN NFE2L2 TP73 GSK3B FOS MAPK8 MAPK1 MAPK3 STAT1" style="cursor: pointer; text-decoration: underline dotted;">9 substrates
59	MAP3K8	0.0008422	0	0	" title="Overlapping EnrichrSubstrates" data-content="MAP3K8 targets 6 genes from the input gene list.The full list of substrates is available below:PIM1 HSP90AA1 ABL1 MAPK1 MAPK3 CDK1" style="cursor: pointer; text-decoration: underline dotted;">6 substrates
60	MAP2K3	0.001405	0	0	" title="Overlapping EnrichrSubstrates" data-content="MAP2K3 targets 5 genes from the input gene list.The full list of substrates is available below:MAPK3 SMAD2 SMAD4 SMAD3 MAPK11" style="cursor: pointer; text-decoration: underline dotted;">5 substrates
61	CDK6	0.001687	0	0	" title="Overlapping EnrichrSubstrates" data-content="CDK6 targets 4 genes from the input gene list.The full list of substrates is available below:RB1 CEBPA H2AFY RBL2" style="cursor: pointer; text-decoration: underline dotted;">4 substrates
62	JAK2	0.00195	0	0	" title="Overlapping EnrichrSubstrates" data-content="JAK2 targets 5 genes from the input gene list.The full list of substrates is available below:GTF2I MAPK1 MAPK3 STAT1 EZH2" style="cursor: pointer; text-decoration: underline dotted;">5 substrates
63	PRKCB	0.002181	0	0	" title="Overlapping EnrichrSubstrates" data-content="PRKCB targets 10 genes from the input gene list.The full list of substrates is available below:ATF2 JUNB JUN TP73 BRCA1 CCND1 BCL2 CDK1 GSK3B CCNA2" style="cursor: pointer; text-decoration: underline dotted;">10 substrates
64	ACTR2B	0.002209	0	0	" title="Overlapping EnrichrSubstrates" data-content="ACTR2B targets 3 genes from the input gene list.The full list of substrates is available below:SMAD2 SMAD3 NCOA3" style="cursor: pointer; text-decoration: underline dotted;">3 substrates
65	RPS6KA1	0.002282	0	0	" title="Overlapping EnrichrSubstrates" data-content="RPS6KA1 targets 6 genes from the input gene list.The full list of substrates is available below:GSK3B FOS CEBPB MAPK1 MAPK3 JUN" style="cursor: pointer; text-decoration: underline dotted;">6 substrates
66	PKCEPSILON	0.00242	0	0	" title="Overlapping EnrichrSubstrates" data-content="PKCEPSILON targets 6 genes from the input gene list.The full list of substrates is available below:JAK1 HSP90AA1 MAPK1 MAPK3 SP1 BCL2" style="cursor: pointer; text-decoration: underline dotted;">6 substrates
67	NPM/ALK	0.003543	0	0	" title="Overlapping EnrichrSubstrates" data-content="NPM/ALK targets 2 genes from the input gene list.The full list of substrates is available below:MSH2 STAT1" style="cursor: pointer; text-decoration: underline dotted;">2 substrates
68	IKBKB	0.003762	0	0	" title="Overlapping EnrichrSubstrates" data-content="IKBKB targets 6 genes from the input gene list.The full list of substrates is available below:HNRNPU TP63 TUBB FOS RELA CDKN2A" style="cursor: pointer; text-decoration: underline dotted;">6 substrates
69	CK2A2	0.003969	0	0	" title="Overlapping EnrichrSubstrates" data-content="CK2A2 targets 5 genes from the input gene list.The full list of substrates is available below:MYC HSP90AA1 HDAC2 RELA JUN" style="cursor: pointer; text-decoration: underline dotted;">5 substrates
70	PLK3	0.004509	0	0	" title="Overlapping EnrichrSubstrates" data-content="PLK3 targets 4 genes from the input gene list.The full list of substrates is available below:ATF2 HIF1A CHEK2 JUN" style="cursor: pointer; text-decoration: underline dotted;">4 substrates
71	PKMYT1	0.00537	0	0	" title="Overlapping EnrichrSubstrates" data-content="PKMYT1 targets 3 genes from the input gene list.The full list of substrates is available below:SMARCA4 RAD51 CDK1" style="cursor: pointer; text-decoration: underline dotted;">3 substrates
72	PKA	0.00537	0	0	" title="Overlapping EnrichrSubstrates" data-content="PKA targets 3 genes from the input gene list.The full list of substrates is available below:GSK3B RELA RARA" style="cursor: pointer; text-decoration: underline dotted;">3 substrates
73	CSNK2B	0.00537	0	0	" title="Overlapping EnrichrSubstrates" data-content="CSNK2B targets 3 genes from the input gene list.The full list of substrates is available below:FOS RUVBL2 CSNK2B" style="cursor: pointer; text-decoration: underline dotted;">3 substrates
74	RPS6KB1	0.005729	0	0	" title="Overlapping EnrichrSubstrates" data-content="RPS6KB1 targets 5 genes from the input gene list.The full list of substrates is available below:GSK3B CCAR2 TP63 CDKN2A CDK1" style="cursor: pointer; text-decoration: underline dotted;">5 substrates
75	PKCIOTA	0.006693	0	0	" title="Overlapping EnrichrSubstrates" data-content="PKCIOTA targets 4 genes from the input gene list.The full list of substrates is available below:RELA CCND1 RUVBL2 HSP90AA1" style="cursor: pointer; text-decoration: underline dotted;">4 substrates
76	WEE1	0.006816	0	0	" title="Overlapping EnrichrSubstrates" data-content="WEE1 targets 3 genes from the input gene list.The full list of substrates is available below:HSP90AA1 CDK2 CDK1" style="cursor: pointer; text-decoration: underline dotted;">3 substrates
77	IKKALPHA	0.007618	0	0	" title="Overlapping EnrichrSubstrates" data-content="IKKALPHA targets 3 genes from the input gene list.The full list of substrates is available below:HSP90AA1 RELA NFKB2" style="cursor: pointer; text-decoration: underline dotted;">3 substrates
78	RSK3	0.008244	0	0	" title="Overlapping EnrichrSubstrates" data-content="RSK3 targets 2 genes from the input gene list.The full list of substrates is available below:MAPK1 MAPK3" style="cursor: pointer; text-decoration: underline dotted;">2 substrates
79	PBK	0.008473	0	0	" title="Overlapping EnrichrSubstrates" data-content="PBK targets 3 genes from the input gene list.The full list of substrates is available below:E2F4 JUN CCNA2" style="cursor: pointer; text-decoration: underline dotted;">3 substrates
80	PAK2	0.008847	0	0	" title="Overlapping EnrichrSubstrates" data-content="PAK2 targets 5 genes from the input gene list.The full list of substrates is available below:MYC ABL1 SMAD2 JUN HIST1H4A" style="cursor: pointer; text-decoration: underline dotted;">5 substrates
81	PRKCI	0.008874	0	0	" title="Overlapping EnrichrSubstrates" data-content="PRKCI targets 4 genes from the input gene list.The full list of substrates is available below:DDB1 CDK7 SP1 EZH2" style="cursor: pointer; text-decoration: underline dotted;">4 substrates
82	GSK3A	0.01012	0	0	" title="Overlapping EnrichrSubstrates" data-content="GSK3A targets 4 genes from the input gene list.The full list of substrates is available below:CCND1 MYC CEBPA CEBPB" style="cursor: pointer; text-decoration: underline dotted;">4 substrates
83	AURORA	0.0102	0	0	" title="Overlapping EnrichrSubstrates" data-content="AURORA targets 2 genes from the input gene list.The full list of substrates is available below:BRCA1 AURKA" style="cursor: pointer; text-decoration: underline dotted;">2 substrates
84	DNA	0.0102	0	0	" title="Overlapping EnrichrSubstrates" data-content="DNA targets 2 genes from the input gene list.The full list of substrates is available below:HSP90AA1 JUN" style="cursor: pointer; text-decoration: underline dotted;">2 substrates
85	TBK1	0.01027	0	0	" title="Overlapping EnrichrSubstrates" data-content="TBK1 targets 5 genes from the input gene list.The full list of substrates is available below:RUVBL2 TUBB RPL11 RELA E2F1" style="cursor: pointer; text-decoration: underline dotted;">5 substrates
86	GSK3ALPHA	0.01078	0	0	" title="Overlapping EnrichrSubstrates" data-content="GSK3ALPHA targets 4 genes from the input gene list.The full list of substrates is available below:GSK3B CCND1 MYC JUN" style="cursor: pointer; text-decoration: underline dotted;">4 substrates
87	MELK	0.01136	0	0	" title="Overlapping EnrichrSubstrates" data-content="MELK targets 3 genes from the input gene list.The full list of substrates is available below:SMAD2 SMAD4 SMAD3" style="cursor: pointer; text-decoration: underline dotted;">3 substrates
88	JAK3	0.01357	0	0	" title="Overlapping EnrichrSubstrates" data-content="JAK3 targets 3 genes from the input gene list.The full list of substrates is available below:JAK1 STAT1 EZH2" style="cursor: pointer; text-decoration: underline dotted;">3 substrates
89	MAPK7	0.01357	0	0	" title="Overlapping EnrichrSubstrates" data-content="MAPK7 targets 3 genes from the input gene list.The full list of substrates is available below:ETS1 FOS PML" style="cursor: pointer; text-decoration: underline dotted;">3 substrates
90	MAPK12	0.01357	0	0	" title="Overlapping EnrichrSubstrates" data-content="MAPK12 targets 5 genes from the input gene list.The full list of substrates is available below:ATF2 CCND1 FOS ABL1 JUN" style="cursor: pointer; text-decoration: underline dotted;">5 substrates
91	CK1ALPHA	0.01419	0	0	" title="Overlapping EnrichrSubstrates" data-content="CK1ALPHA targets 5 genes from the input gene list.The full list of substrates is available below:RB1 GSK3B FOS JUN ATM" style="cursor: pointer; text-decoration: underline dotted;">5 substrates
92	CAMKIV	0.01465	0	0	" title="Overlapping EnrichrSubstrates" data-content="CAMKIV targets 2 genes from the input gene list.The full list of substrates is available below:HDAC4 RELA" style="cursor: pointer; text-decoration: underline dotted;">2 substrates
93	CAMK2D	0.01476	0	0	" title="Overlapping EnrichrSubstrates" data-content="CAMK2D targets 3 genes from the input gene list.The full list of substrates is available below:HDAC4 GSK3B SMAD4" style="cursor: pointer; text-decoration: underline dotted;">3 substrates
94	ABL	0.01535	0	0	" title="Overlapping EnrichrSubstrates" data-content="ABL targets 4 genes from the input gene list.The full list of substrates is available below:ABL1 RAD51 CDK2 TP73" style="cursor: pointer; text-decoration: underline dotted;">4 substrates
95	MAP3K14	0.01896	0	0	" title="Overlapping EnrichrSubstrates" data-content="MAP3K14 targets 6 genes from the input gene list.The full list of substrates is available below:HNRNPU RUVBL2 NFKB2 TUBB RARA RPL11" style="cursor: pointer; text-decoration: underline dotted;">6 substrates
96	PKD1	0.01899	0	0	" title="Overlapping EnrichrSubstrates" data-content="PKD1 targets 4 genes from the input gene list.The full list of substrates is available below:HDAC4 MAPK8 ABL1 JUN" style="cursor: pointer; text-decoration: underline dotted;">4 substrates
97	TRKB	0.01979	0	0	" title="Overlapping EnrichrSubstrates" data-content="TRKB targets 2 genes from the input gene list.The full list of substrates is available below:FOS ABL1" style="cursor: pointer; text-decoration: underline dotted;">2 substrates
98	BRD2	0.01979	0	0	" title="Overlapping EnrichrSubstrates" data-content="BRD2 targets 2 genes from the input gene list.The full list of substrates is available below:RB1 RBL2" style="cursor: pointer; text-decoration: underline dotted;">2 substrates
99	RET	0.02469	0	0	" title="Overlapping EnrichrSubstrates" data-content="RET targets 3 genes from the input gene list.The full list of substrates is available below:MAPK8 MAPK1 MAPK3" style="cursor: pointer; text-decoration: underline dotted;">3 substrates
100	ALK	0.02469	0	0	" title="Overlapping EnrichrSubstrates" data-content="ALK targets 3 genes from the input gene list.The full list of substrates is available below:RELA HSP90AA1 NCOA6" style="cursor: pointer; text-decoration: underline dotted;">3 substrates
101	DYRK2	0.02805	0	0	" title="Overlapping EnrichrSubstrates" data-content="DYRK2 targets 3 genes from the input gene list.The full list of substrates is available below:MYC JUN SIAH2" style="cursor: pointer; text-decoration: underline dotted;">3 substrates
102	PRKAA1	0.03056	0	0	" title="Overlapping EnrichrSubstrates" data-content="PRKAA1 targets 5 genes from the input gene list.The full list of substrates is available below:RB1 PIAS1 NFE2L2 TP73 JAK1" style="cursor: pointer; text-decoration: underline dotted;">5 substrates
103	RAD17	0.03126	0	0	" title="Overlapping EnrichrSubstrates" data-content="RAD17 targets 1 genes from the input gene list.The full list of substrates is available below:ATR" style="cursor: pointer; text-decoration: underline dotted;">1 substrates
104	CDKN1B	0.03126	0	0	" title="Overlapping EnrichrSubstrates" data-content="CDKN1B targets 1 genes from the input gene list.The full list of substrates is available below:CDK2" style="cursor: pointer; text-decoration: underline dotted;">1 substrates
105	BAZ1B	0.03126	0	0	" title="Overlapping EnrichrSubstrates" data-content="BAZ1B targets 1 genes from the input gene list.The full list of substrates is available below:H2AFX" style="cursor: pointer; text-decoration: underline dotted;">1 substrates
106	GTF2H1	0.03126	0	0	" title="Overlapping EnrichrSubstrates" data-content="GTF2H1 targets 1 genes from the input gene list.The full list of substrates is available below:CDK7" style="cursor: pointer; text-decoration: underline dotted;">1 substrates
107	TRIM33	0.03126	0	0	" title="Overlapping EnrichrSubstrates" data-content="TRIM33 targets 1 genes from the input gene list.The full list of substrates is available below:SMAD4" style="cursor: pointer; text-decoration: underline dotted;">1 substrates
108	PCNA	0.03126	0	0	" title="Overlapping EnrichrSubstrates" data-content="PCNA targets 1 genes from the input gene list.The full list of substrates is available below:CDK2" style="cursor: pointer; text-decoration: underline dotted;">1 substrates
109	WRNIP1	0.03126	0	0	" title="Overlapping EnrichrSubstrates" data-content="WRNIP1 targets 1 genes from the input gene list.The full list of substrates is available below:ATR" style="cursor: pointer; text-decoration: underline dotted;">1 substrates
110	EP400	0.03126	0	0	" title="Overlapping EnrichrSubstrates" data-content="EP400 targets 1 genes from the input gene list.The full list of substrates is available below:TRRAP" style="cursor: pointer; text-decoration: underline dotted;">1 substrates
111	LYK5	0.03126	0	0	" title="Overlapping EnrichrSubstrates" data-content="LYK5 targets 1 genes from the input gene list.The full list of substrates is available below:SMAD4" style="cursor: pointer; text-decoration: underline dotted;">1 substrates
112	ERCC3	0.03126	0	0	" title="Overlapping EnrichrSubstrates" data-content="ERCC3 targets 1 genes from the input gene list.The full list of substrates is available below:CDK7" style="cursor: pointer; text-decoration: underline dotted;">1 substrates
113	DYRK1A	0.03164	0	0	" title="Overlapping EnrichrSubstrates" data-content="DYRK1A targets 3 genes from the input gene list.The full list of substrates is available below:CCND1 POLR2A SIRT1" style="cursor: pointer; text-decoration: underline dotted;">3 substrates
114	PKR	0.03352	0	0	" title="Overlapping EnrichrSubstrates" data-content="PKR targets 3 genes from the input gene list.The full list of substrates is available below:JAK1 HSP90AA1 STAT1" style="cursor: pointer; text-decoration: underline dotted;">3 substrates
115	EGFR	0.03577	0	0	" title="Overlapping EnrichrSubstrates" data-content="EGFR targets 7 genes from the input gene list.The full list of substrates is available below:CCND1 JUNB JUN ATM HSP90AA1 FOS STAT1" style="cursor: pointer; text-decoration: underline dotted;">7 substrates
116	INSR	0.04008	0	0	" title="Overlapping EnrichrSubstrates" data-content="INSR targets 4 genes from the input gene list.The full list of substrates is available below:CCND1 FOS JUN STAT1" style="cursor: pointer; text-decoration: underline dotted;">4 substrates
117	IKKBETA	0.0416	0	0	" title="Overlapping EnrichrSubstrates" data-content="IKKBETA targets 3 genes from the input gene list.The full list of substrates is available below:RELA FOS NFKB2" style="cursor: pointer; text-decoration: underline dotted;">3 substrates
118	CDK13	0.04253	0	0	" title="Overlapping EnrichrSubstrates" data-content="CDK13 targets 2 genes from the input gene list.The full list of substrates is available below:HUWE1 POLR2A" style="cursor: pointer; text-decoration: underline dotted;">2 substrates
119	LYN	0.04358	0	0	" title="Overlapping EnrichrSubstrates" data-content="LYN targets 6 genes from the input gene list.The full list of substrates is available below:YY1 CCND1 MYC CSNK2A1 ABL1 STAT1" style="cursor: pointer; text-decoration: underline dotted;">6 substrates
120	NEK2	0.04377	0	0	" title="Overlapping EnrichrSubstrates" data-content="NEK2 targets 3 genes from the input gene list.The full list of substrates is available below:AURKA CCNA2 CDK1" style="cursor: pointer; text-decoration: underline dotted;">3 substrates
121	PKBBETA	0.04377	0	0	" title="Overlapping EnrichrSubstrates" data-content="PKBBETA targets 3 genes from the input gene list.The full list of substrates is available below:GSK3B XIAP RELA" style="cursor: pointer; text-decoration: underline dotted;">3 substrates
122	MARK4	0.04631	0	0	" title="Overlapping EnrichrSubstrates" data-content="MARK4 targets 2 genes from the input gene list.The full list of substrates is available below:SMARCA4 MAPK11" style="cursor: pointer; text-decoration: underline dotted;">2 substrates
123	GTF2F1	0.04652	0	0	" title="Overlapping EnrichrSubstrates" data-content="GTF2F1 targets 1 genes from the input gene list.The full list of substrates is available below:GTF2F1" style="cursor: pointer; text-decoration: underline dotted;">1 substrates
124	PKCTHETA	0.05296	0	0	" title="Overlapping EnrichrSubstrates" data-content="PKCTHETA targets 3 genes from the input gene list.The full list of substrates is available below:MAPK8 MAPK1 MAPK3" style="cursor: pointer; text-decoration: underline dotted;">3 substrates
125	CAMK2A	0.05412	0	0	" title="Overlapping EnrichrSubstrates" data-content="CAMK2A targets 5 genes from the input gene list.The full list of substrates is available below:ETS1 CCAR2 CCND1 MYC SMAD2" style="cursor: pointer; text-decoration: underline dotted;">5 substrates
126	TLK1	0.05423	0	0	" title="Overlapping EnrichrSubstrates" data-content="TLK1 targets 2 genes from the input gene list.The full list of substrates is available below:HNRNPD ATM" style="cursor: pointer; text-decoration: underline dotted;">2 substrates
127	MAP4K4	0.05423	0	0	" title="Overlapping EnrichrSubstrates" data-content="MAP4K4 targets 2 genes from the input gene list.The full list of substrates is available below:SMARCA4 ABL1" style="cursor: pointer; text-decoration: underline dotted;">2 substrates
128	MAPK6	0.05423	0	0	" title="Overlapping EnrichrSubstrates" data-content="MAPK6 targets 2 genes from the input gene list.The full list of substrates is available below:NCOA3 DDB1" style="cursor: pointer; text-decoration: underline dotted;">2 substrates
129	PIM1	0.05788	0	0	" title="Overlapping EnrichrSubstrates" data-content="PIM1 targets 3 genes from the input gene list.The full list of substrates is available below:MYC SKP2 RELA" style="cursor: pointer; text-decoration: underline dotted;">3 substrates
130	FRK	0.05835	0	0	" title="Overlapping EnrichrSubstrates" data-content="FRK targets 2 genes from the input gene list.The full list of substrates is available below:BRCA1 FOS" style="cursor: pointer; text-decoration: underline dotted;">2 substrates
131	CAMKIIBETA	0.06042	0	0	" title="Overlapping EnrichrSubstrates" data-content="CAMKIIBETA targets 3 genes from the input gene list.The full list of substrates is available below:ETS1 JAK1 FOS" style="cursor: pointer; text-decoration: underline dotted;">3 substrates
132	MAP3K20	0.06155	0	0	" title="Overlapping EnrichrSubstrates" data-content="MAP3K20 targets 1 genes from the input gene list.The full list of substrates is available below:CHEK2" style="cursor: pointer; text-decoration: underline dotted;">1 substrates
133	EPHB3	0.06691	0	0	" title="Overlapping EnrichrSubstrates" data-content="EPHB3 targets 2 genes from the input gene list.The full list of substrates is available below:ABL1 SMARCA4" style="cursor: pointer; text-decoration: underline dotted;">2 substrates
134	EPHA8	0.06691	0	0	" title="Overlapping EnrichrSubstrates" data-content="EPHA8 targets 2 genes from the input gene list.The full list of substrates is available below:ABL1 SMARCA4" style="cursor: pointer; text-decoration: underline dotted;">2 substrates
135	VRK1	0.07133	0	0	" title="Overlapping EnrichrSubstrates" data-content="VRK1 targets 2 genes from the input gene list.The full list of substrates is available below:ATF2 JUN" style="cursor: pointer; text-decoration: underline dotted;">2 substrates
136	RPS6KA2	0.07133	0	0	" title="Overlapping EnrichrSubstrates" data-content="RPS6KA2 targets 2 genes from the input gene list.The full list of substrates is available below:GSK3B MAPK3" style="cursor: pointer; text-decoration: underline dotted;">2 substrates
137	MOK	0.07133	0	0	" title="Overlapping EnrichrSubstrates" data-content="MOK targets 2 genes from the input gene list.The full list of substrates is available below:MYC JUN" style="cursor: pointer; text-decoration: underline dotted;">2 substrates
138	CAMKIIALPHA	0.07671	0	0	" title="Overlapping EnrichrSubstrates" data-content="CAMKIIALPHA targets 3 genes from the input gene list.The full list of substrates is available below:ETS1 JAK1 CEBPB" style="cursor: pointer; text-decoration: underline dotted;">3 substrates
139	TGFBR1	0.07671	0	0	" title="Overlapping EnrichrSubstrates" data-content="TGFBR1 targets 3 genes from the input gene list.The full list of substrates is available below:TP63 SMAD2 STAT1" style="cursor: pointer; text-decoration: underline dotted;">3 substrates
140	PKBGAMMA	0.08045	0	0	" title="Overlapping EnrichrSubstrates" data-content="PKBGAMMA targets 2 genes from the input gene list.The full list of substrates is available below:GSK3B RELA" style="cursor: pointer; text-decoration: underline dotted;">2 substrates
141	UHMK1	0.08514	0	0	" title="Overlapping EnrichrSubstrates" data-content="UHMK1 targets 2 genes from the input gene list.The full list of substrates is available below:SMAD2 SMAD4" style="cursor: pointer; text-decoration: underline dotted;">2 substrates
142	PRKACB	0.08992	0	0	" title="Overlapping EnrichrSubstrates" data-content="PRKACB targets 2 genes from the input gene list.The full list of substrates is available below:STAT1 FOS" style="cursor: pointer; text-decoration: underline dotted;">2 substrates
143	JAK1	0.08992	0	0	" title="Overlapping EnrichrSubstrates" data-content="JAK1 targets 2 genes from the input gene list.The full list of substrates is available below:ETS1 STAT1" style="cursor: pointer; text-decoration: underline dotted;">2 substrates
144	EEF2K	0.08992	0	0	" title="Overlapping EnrichrSubstrates" data-content="EEF2K targets 2 genes from the input gene list.The full list of substrates is available below:MAPK8 MAPK11" style="cursor: pointer; text-decoration: underline dotted;">2 substrates
145	CAM	0.09089	0	0	" title="Overlapping EnrichrSubstrates" data-content="CAM targets 1 genes from the input gene list.The full list of substrates is available below:HDAC4" style="cursor: pointer; text-decoration: underline dotted;">1 substrates
146	NEK6	0.09476	0	0	" title="Overlapping EnrichrSubstrates" data-content="NEK6 targets 2 genes from the input gene list.The full list of substrates is available below:RBL2 CDK7" style="cursor: pointer; text-decoration: underline dotted;">2 substrates
147	MAP3K1	0.09559	0	0	" title="Overlapping EnrichrSubstrates" data-content="MAP3K1 targets 5 genes from the input gene list.The full list of substrates is available below:RUVBL2 HIST1H4A HSP90AA1 TUBB DDB1" style="cursor: pointer; text-decoration: underline dotted;">5 substrates
148	BTK	0.09787	0	0	" title="Overlapping EnrichrSubstrates" data-content="BTK targets 3 genes from the input gene list.The full list of substrates is available below:GTF2I FOS JUN" style="cursor: pointer; text-decoration: underline dotted;">3 substrates
149	DAPK1	0.09969	0	0	" title="Overlapping EnrichrSubstrates" data-content="DAPK1 targets 2 genes from the input gene list.The full list of substrates is available below:MAPK3 PIN1" style="cursor: pointer; text-decoration: underline dotted;">2 substrates
150	STK4	0.1047	0	0	" title="Overlapping EnrichrSubstrates" data-content="STK4 targets 2 genes from the input gene list.The full list of substrates is available below:ABL1 H2AFX" style="cursor: pointer; text-decoration: underline dotted;">2 substrates
151	ZAP70	0.1047	0	0	" title="Overlapping EnrichrSubstrates" data-content="ZAP70 targets 2 genes from the input gene list.The full list of substrates is available below:UBE2L3 MAPK11" style="cursor: pointer; text-decoration: underline dotted;">2 substrates
152	CHK1	0.1052	0	0	" title="Overlapping EnrichrSubstrates" data-content="CHK1 targets 1 genes from the input gene list.The full list of substrates is available below:TP73" style="cursor: pointer; text-decoration: underline dotted;">1 substrates
153	NIK	0.1052	0	0	" title="Overlapping EnrichrSubstrates" data-content="NIK targets 1 genes from the input gene list.The full list of substrates is available below:CEBPB" style="cursor: pointer; text-decoration: underline dotted;">1 substrates
154	HSPB8	0.1052	0	0	" title="Overlapping EnrichrSubstrates" data-content="HSPB8 targets 1 genes from the input gene list.The full list of substrates is available below:MAPK3" style="cursor: pointer; text-decoration: underline dotted;">1 substrates
155	PKAALPHA	0.1128	0	0	" title="Overlapping EnrichrSubstrates" data-content="PKAALPHA targets 4 genes from the input gene list.The full list of substrates is available below:CDK16 FOS RELA AURKA" style="cursor: pointer; text-decoration: underline dotted;">4 substrates
156	PRKD1	0.1177	0	0	" title="Overlapping EnrichrSubstrates" data-content="PRKD1 targets 3 genes from the input gene list.The full list of substrates is available below:ABL1 TFAP2A JUN" style="cursor: pointer; text-decoration: underline dotted;">3 substrates
157	PKC	0.1193	0	0	" title="Overlapping EnrichrSubstrates" data-content="PKC targets 1 genes from the input gene list.The full list of substrates is available below:ATF2" style="cursor: pointer; text-decoration: underline dotted;">1 substrates
158	RSK	0.1193	0	0	" title="Overlapping EnrichrSubstrates" data-content="RSK targets 1 genes from the input gene list.The full list of substrates is available below:CEBPB" style="cursor: pointer; text-decoration: underline dotted;">1 substrates
159	MAPK13	0.1211	0	0	" title="Overlapping EnrichrSubstrates" data-content="MAPK13 targets 3 genes from the input gene list.The full list of substrates is available below:ATF2 FOS JUN" style="cursor: pointer; text-decoration: underline dotted;">3 substrates
160	MARK2	0.1306	0	0	" title="Overlapping EnrichrSubstrates" data-content="MARK2 targets 2 genes from the input gene list.The full list of substrates is available below:HDAC4 GSK3B" style="cursor: pointer; text-decoration: underline dotted;">2 substrates
161	AURORAB	0.1316	0	0	" title="Overlapping EnrichrSubstrates" data-content="AURORAB targets 3 genes from the input gene list.The full list of substrates is available below:RB1 AURKA CDK1" style="cursor: pointer; text-decoration: underline dotted;">3 substrates
162	BCR/ABL	0.1332	0	0	" title="Overlapping EnrichrSubstrates" data-content="BCR/ABL targets 1 genes from the input gene list.The full list of substrates is available below:RAD51" style="cursor: pointer; text-decoration: underline dotted;">1 substrates
163	CSNK1A1	0.1461	0	0	" title="Overlapping EnrichrSubstrates" data-content="CSNK1A1 targets 3 genes from the input gene list.The full list of substrates is available below:CCAR2 RELA VHL" style="cursor: pointer; text-decoration: underline dotted;">3 substrates
164	MAP2K2	0.1468	0	0	" title="Overlapping EnrichrSubstrates" data-content="MAP2K2 targets 2 genes from the input gene list.The full list of substrates is available below:MAPK1 MAPK3" style="cursor: pointer; text-decoration: underline dotted;">2 substrates
165	ABL2	0.1468	0	0	" title="Overlapping EnrichrSubstrates" data-content="ABL2 targets 2 genes from the input gene list.The full list of substrates is available below:CEBPB ABL1" style="cursor: pointer; text-decoration: underline dotted;">2 substrates
166	RPS6KA5	0.1468	0	0	" title="Overlapping EnrichrSubstrates" data-content="RPS6KA5 targets 2 genes from the input gene list.The full list of substrates is available below:RELA RARA" style="cursor: pointer; text-decoration: underline dotted;">2 substrates
167	TRRAP	0.1469	0	0	" title="Overlapping EnrichrSubstrates" data-content="TRRAP targets 1 genes from the input gene list.The full list of substrates is available below:HUWE1" style="cursor: pointer; text-decoration: underline dotted;">1 substrates
168	RSK	0.1469	0	0	" title="Overlapping EnrichrSubstrates" data-content="RSK targets 1 genes from the input gene list.The full list of substrates is available below:FOS" style="cursor: pointer; text-decoration: underline dotted;">1 substrates
169	RIPK1	0.1522	0	0	" title="Overlapping EnrichrSubstrates" data-content="RIPK1 targets 2 genes from the input gene list.The full list of substrates is available below:TUBB PML" style="cursor: pointer; text-decoration: underline dotted;">2 substrates
170	PKC	0.1603	0	0	" title="Overlapping EnrichrSubstrates" data-content="PKC targets 1 genes from the input gene list.The full list of substrates is available below:RELA" style="cursor: pointer; text-decoration: underline dotted;">1 substrates
171	RIPK2	0.1633	0	0	" title="Overlapping EnrichrSubstrates" data-content="RIPK2 targets 2 genes from the input gene list.The full list of substrates is available below:HSP90AA1 TUBB" style="cursor: pointer; text-decoration: underline dotted;">2 substrates
172	PKCALPHA	0.1636	0	0	" title="Overlapping EnrichrSubstrates" data-content="PKCALPHA targets 4 genes from the input gene list.The full list of substrates is available below:MYC BCL2 GSK3B JAK1" style="cursor: pointer; text-decoration: underline dotted;">4 substrates
173	EPHB2	0.1689	0	0	" title="Overlapping EnrichrSubstrates" data-content="EPHB2 targets 2 genes from the input gene list.The full list of substrates is available below:ABL1 GTF2I" style="cursor: pointer; text-decoration: underline dotted;">2 substrates
174	CSNK1D	0.1689	0	0	" title="Overlapping EnrichrSubstrates" data-content="CSNK1D targets 2 genes from the input gene list.The full list of substrates is available below:HIF1A NCOA3" style="cursor: pointer; text-decoration: underline dotted;">2 substrates
175	BRD4	0.1736	0	0	" title="Overlapping EnrichrSubstrates" data-content="BRD4 targets 1 genes from the input gene list.The full list of substrates is available below:POLR2A" style="cursor: pointer; text-decoration: underline dotted;">1 substrates
176	JNK3	0.1736	0	0	" title="Overlapping EnrichrSubstrates" data-content="JNK3 targets 1 genes from the input gene list.The full list of substrates is available below:JUN" style="cursor: pointer; text-decoration: underline dotted;">1 substrates
177	PRKCG	0.1802	0	0	" title="Overlapping EnrichrSubstrates" data-content="PRKCG targets 2 genes from the input gene list.The full list of substrates is available below:GSK3B HSP90AA1" style="cursor: pointer; text-decoration: underline dotted;">2 substrates
178	PDGFRALPHA	0.1866	0	0	" title="Overlapping EnrichrSubstrates" data-content="PDGFRALPHA targets 1 genes from the input gene list.The full list of substrates is available below:JAK1" style="cursor: pointer; text-decoration: underline dotted;">1 substrates
179	ADRBK1	0.1866	0	0	" title="Overlapping EnrichrSubstrates" data-content="ADRBK1 targets 1 genes from the input gene list.The full list of substrates is available below:MAPK3" style="cursor: pointer; text-decoration: underline dotted;">1 substrates
180	FYN	0.2019	0	0	" title="Overlapping EnrichrSubstrates" data-content="FYN targets 5 genes from the input gene list.The full list of substrates is available below:FOS STAT1 CCND1 ABL1 NFE2L2" style="cursor: pointer; text-decoration: underline dotted;">5 substrates
181	FGR	0.2031	0	0	" title="Overlapping EnrichrSubstrates" data-content="FGR targets 2 genes from the input gene list.The full list of substrates is available below:HSP90AA1 ABL1" style="cursor: pointer; text-decoration: underline dotted;">2 substrates
182	IGF1R	0.2205	0	0	" title="Overlapping EnrichrSubstrates" data-content="IGF1R targets 2 genes from the input gene list.The full list of substrates is available below:JAK1 FOS" style="cursor: pointer; text-decoration: underline dotted;">2 substrates
183	SRM	0.2245	0	0	" title="Overlapping EnrichrSubstrates" data-content="SRM targets 1 genes from the input gene list.The full list of substrates is available below:RUVBL2" style="cursor: pointer; text-decoration: underline dotted;">1 substrates
184	PLK4	0.2263	0	0	" title="Overlapping EnrichrSubstrates" data-content="PLK4 targets 2 genes from the input gene list.The full list of substrates is available below:CCNA2 CDK1" style="cursor: pointer; text-decoration: underline dotted;">2 substrates
185	TAF1	0.2368	0	0	" title="Overlapping EnrichrSubstrates" data-content="TAF1 targets 1 genes from the input gene list.The full list of substrates is available below:TAF7" style="cursor: pointer; text-decoration: underline dotted;">1 substrates
186	TRKA	0.2488	0	0	" title="Overlapping EnrichrSubstrates" data-content="TRKA targets 1 genes from the input gene list.The full list of substrates is available below:ABL1" style="cursor: pointer; text-decoration: underline dotted;">1 substrates
187	AKT2	0.2555	0	0	" title="Overlapping EnrichrSubstrates" data-content="AKT2 targets 2 genes from the input gene list.The full list of substrates is available below:GSK3B XIAP" style="cursor: pointer; text-decoration: underline dotted;">2 substrates
188	TAOK1	0.2607	0	0	" title="Overlapping EnrichrSubstrates" data-content="TAOK1 targets 1 genes from the input gene list.The full list of substrates is available below:GSK3B" style="cursor: pointer; text-decoration: underline dotted;">1 substrates
189	CDC42BPB	0.2607	0	0	" title="Overlapping EnrichrSubstrates" data-content="CDC42BPB targets 1 genes from the input gene list.The full list of substrates is available below:CDK16" style="cursor: pointer; text-decoration: underline dotted;">1 substrates
190	PTK7	0.2607	0	0	" title="Overlapping EnrichrSubstrates" data-content="PTK7 targets 1 genes from the input gene list.The full list of substrates is available below:DDB1" style="cursor: pointer; text-decoration: underline dotted;">1 substrates
191	SCYL2	0.2607	0	0	" title="Overlapping EnrichrSubstrates" data-content="SCYL2 targets 1 genes from the input gene list.The full list of substrates is available below:NFYA" style="cursor: pointer; text-decoration: underline dotted;">1 substrates
192	RIPK3	0.2674	0	0	" title="Overlapping EnrichrSubstrates" data-content="RIPK3 targets 3 genes from the input gene list.The full list of substrates is available below:RUVBL2 HSP90AA1 TUBB" style="cursor: pointer; text-decoration: underline dotted;">3 substrates
193	MTOR	0.2716	0	0	" title="Overlapping EnrichrSubstrates" data-content="MTOR targets 3 genes from the input gene list.The full list of substrates is available below:MYC JUN POLR2A" style="cursor: pointer; text-decoration: underline dotted;">3 substrates
194	CDK12	0.2723	0	0	" title="Overlapping EnrichrSubstrates" data-content="CDK12 targets 1 genes from the input gene list.The full list of substrates is available below:POLR2A" style="cursor: pointer; text-decoration: underline dotted;">1 substrates
195	TIE1	0.2723	0	0	" title="Overlapping EnrichrSubstrates" data-content="TIE1 targets 1 genes from the input gene list.The full list of substrates is available below:MAPK11" style="cursor: pointer; text-decoration: underline dotted;">1 substrates
196	MINK1	0.2723	0	0	" title="Overlapping EnrichrSubstrates" data-content="MINK1 targets 1 genes from the input gene list.The full list of substrates is available below:SMAD2" style="cursor: pointer; text-decoration: underline dotted;">1 substrates
197	MAP4K5	0.2723	0	0	" title="Overlapping EnrichrSubstrates" data-content="MAP4K5 targets 1 genes from the input gene list.The full list of substrates is available below:GSK3B" style="cursor: pointer; text-decoration: underline dotted;">1 substrates
198	CLK4	0.2723	0	0	" title="Overlapping EnrichrSubstrates" data-content="CLK4 targets 1 genes from the input gene list.The full list of substrates is available below:ABL1" style="cursor: pointer; text-decoration: underline dotted;">1 substrates
199	WEE2	0.2723	0	0	" title="Overlapping EnrichrSubstrates" data-content="WEE2 targets 1 genes from the input gene list.The full list of substrates is available below:CDK1" style="cursor: pointer; text-decoration: underline dotted;">1 substrates
200	CDK20	0.2838	0	0	" title="Overlapping EnrichrSubstrates" data-content="CDK20 targets 1 genes from the input gene list.The full list of substrates is available below:CDK2" style="cursor: pointer; text-decoration: underline dotted;">1 substrates
201	DMPK	0.2838	0	0	" title="Overlapping EnrichrSubstrates" data-content="DMPK targets 1 genes from the input gene list.The full list of substrates is available below:SP1" style="cursor: pointer; text-decoration: underline dotted;">1 substrates
202	BRSK2	0.2838	0	0	" title="Overlapping EnrichrSubstrates" data-content="BRSK2 targets 1 genes from the input gene list.The full list of substrates is available below:CDK16" style="cursor: pointer; text-decoration: underline dotted;">1 substrates
203	NTRK3	0.2838	0	0	" title="Overlapping EnrichrSubstrates" data-content="NTRK3 targets 1 genes from the input gene list.The full list of substrates is available below:FOS" style="cursor: pointer; text-decoration: underline dotted;">1 substrates
204	ACVR1B	0.2838	0	0	" title="Overlapping EnrichrSubstrates" data-content="ACVR1B targets 1 genes from the input gene list.The full list of substrates is available below:XIAP" style="cursor: pointer; text-decoration: underline dotted;">1 substrates
205	SMG1	0.2951	0	0	" title="Overlapping EnrichrSubstrates" data-content="SMG1 targets 1 genes from the input gene list.The full list of substrates is available below:HUWE1" style="cursor: pointer; text-decoration: underline dotted;">1 substrates
206	PIM3	0.2951	0	0	" title="Overlapping EnrichrSubstrates" data-content="PIM3 targets 1 genes from the input gene list.The full list of substrates is available below:PML" style="cursor: pointer; text-decoration: underline dotted;">1 substrates
207	MAP3K4	0.2951	0	0	" title="Overlapping EnrichrSubstrates" data-content="MAP3K4 targets 1 genes from the input gene list.The full list of substrates is available below:TRRAP" style="cursor: pointer; text-decoration: underline dotted;">1 substrates
208	FLT3	0.2951	0	0	" title="Overlapping EnrichrSubstrates" data-content="FLT3 targets 1 genes from the input gene list.The full list of substrates is available below:H2AFY" style="cursor: pointer; text-decoration: underline dotted;">1 substrates
209	TLK2	0.2951	0	0	" title="Overlapping EnrichrSubstrates" data-content="TLK2 targets 1 genes from the input gene list.The full list of substrates is available below:ASF1A" style="cursor: pointer; text-decoration: underline dotted;">1 substrates
210	CAM	0.2951	0	0	" title="Overlapping EnrichrSubstrates" data-content="CAM targets 1 genes from the input gene list.The full list of substrates is available below:ETS1" style="cursor: pointer; text-decoration: underline dotted;">1 substrates
211	SGK2	0.2951	0	0	" title="Overlapping EnrichrSubstrates" data-content="SGK2 targets 1 genes from the input gene list.The full list of substrates is available below:GSK3B" style="cursor: pointer; text-decoration: underline dotted;">1 substrates
212	PNCK	0.2951	0	0	" title="Overlapping EnrichrSubstrates" data-content="PNCK targets 1 genes from the input gene list.The full list of substrates is available below:HSP90AA1" style="cursor: pointer; text-decoration: underline dotted;">1 substrates
213	MAPK15	0.2951	0	0	" title="Overlapping EnrichrSubstrates" data-content="MAPK15 targets 1 genes from the input gene list.The full list of substrates is available below:JUN" style="cursor: pointer; text-decoration: underline dotted;">1 substrates
214	MAP3K6	0.3063	0	0	" title="Overlapping EnrichrSubstrates" data-content="MAP3K6 targets 1 genes from the input gene list.The full list of substrates is available below:MAPK8" style="cursor: pointer; text-decoration: underline dotted;">1 substrates
215	PDHK1	0.314	0	0	" title="Overlapping EnrichrSubstrates" data-content="PDHK1 targets 2 genes from the input gene list.The full list of substrates is available below:GSK3B HSP90AA1" style="cursor: pointer; text-decoration: underline dotted;">2 substrates
216	CDK16	0.3172	0	0	" title="Overlapping EnrichrSubstrates" data-content="CDK16 targets 1 genes from the input gene list.The full list of substrates is available below:SMARCA4" style="cursor: pointer; text-decoration: underline dotted;">1 substrates
217	CSNK1G1	0.3172	0	0	" title="Overlapping EnrichrSubstrates" data-content="CSNK1G1 targets 1 genes from the input gene list.The full list of substrates is available below:RELA" style="cursor: pointer; text-decoration: underline dotted;">1 substrates
218	MAP3K11	0.3172	0	0	" title="Overlapping EnrichrSubstrates" data-content="MAP3K11 targets 1 genes from the input gene list.The full list of substrates is available below:PIN1" style="cursor: pointer; text-decoration: underline dotted;">1 substrates
219	EPHB4	0.3172	0	0	" title="Overlapping EnrichrSubstrates" data-content="EPHB4 targets 1 genes from the input gene list.The full list of substrates is available below:ABL1" style="cursor: pointer; text-decoration: underline dotted;">1 substrates
220	DYRK3	0.3172	0	0	" title="Overlapping EnrichrSubstrates" data-content="DYRK3 targets 1 genes from the input gene list.The full list of substrates is available below:SIRT1" style="cursor: pointer; text-decoration: underline dotted;">1 substrates
221	CAMK2G	0.3172	0	0	" title="Overlapping EnrichrSubstrates" data-content="CAMK2G targets 1 genes from the input gene list.The full list of substrates is available below:STAT1" style="cursor: pointer; text-decoration: underline dotted;">1 substrates
222	MYLK2	0.328	0	0	" title="Overlapping EnrichrSubstrates" data-content="MYLK2 targets 1 genes from the input gene list.The full list of substrates is available below:NFKB2" style="cursor: pointer; text-decoration: underline dotted;">1 substrates
223	RPS6KA4	0.328	0	0	" title="Overlapping EnrichrSubstrates" data-content="RPS6KA4 targets 1 genes from the input gene list.The full list of substrates is available below:RELA" style="cursor: pointer; text-decoration: underline dotted;">1 substrates
224	YES	0.328	0	0	" title="Overlapping EnrichrSubstrates" data-content="YES targets 1 genes from the input gene list.The full list of substrates is available below:ABL1" style="cursor: pointer; text-decoration: underline dotted;">1 substrates
225	GRK6	0.328	0	0	" title="Overlapping EnrichrSubstrates" data-content="GRK6 targets 1 genes from the input gene list.The full list of substrates is available below:ETS1" style="cursor: pointer; text-decoration: underline dotted;">1 substrates
226	TYK2	0.3314	0	0	" title="Overlapping EnrichrSubstrates" data-content="TYK2 targets 2 genes from the input gene list.The full list of substrates is available below:JAK1 NFKB2" style="cursor: pointer; text-decoration: underline dotted;">2 substrates
227	MYLK	0.3386	0	0	" title="Overlapping EnrichrSubstrates" data-content="MYLK targets 1 genes from the input gene list.The full list of substrates is available below:MAPK3" style="cursor: pointer; text-decoration: underline dotted;">1 substrates
228	NEK1	0.3386	0	0	" title="Overlapping EnrichrSubstrates" data-content="NEK1 targets 1 genes from the input gene list.The full list of substrates is available below:VHL" style="cursor: pointer; text-decoration: underline dotted;">1 substrates
229	PIM2	0.3386	0	0	" title="Overlapping EnrichrSubstrates" data-content="PIM2 targets 1 genes from the input gene list.The full list of substrates is available below:MYC" style="cursor: pointer; text-decoration: underline dotted;">1 substrates
230	EPHB6	0.3386	0	0	" title="Overlapping EnrichrSubstrates" data-content="EPHB6 targets 1 genes from the input gene list.The full list of substrates is available below:ABL1" style="cursor: pointer; text-decoration: underline dotted;">1 substrates
231	MARK3	0.3386	0	0	" title="Overlapping EnrichrSubstrates" data-content="MARK3 targets 1 genes from the input gene list.The full list of substrates is available below:DDB1" style="cursor: pointer; text-decoration: underline dotted;">1 substrates
232	EPHA5	0.3491	0	0	" title="Overlapping EnrichrSubstrates" data-content="EPHA5 targets 1 genes from the input gene list.The full list of substrates is available below:ABL1" style="cursor: pointer; text-decoration: underline dotted;">1 substrates
233	EPHA7	0.3491	0	0	" title="Overlapping EnrichrSubstrates" data-content="EPHA7 targets 1 genes from the input gene list.The full list of substrates is available below:ABL1" style="cursor: pointer; text-decoration: underline dotted;">1 substrates
234	MAP4K1	0.3491	0	0	" title="Overlapping EnrichrSubstrates" data-content="MAP4K1 targets 1 genes from the input gene list.The full list of substrates is available below:ABL1" style="cursor: pointer; text-decoration: underline dotted;">1 substrates
235	FES	0.3491	0	0	" title="Overlapping EnrichrSubstrates" data-content="FES targets 1 genes from the input gene list.The full list of substrates is available below:JAK1" style="cursor: pointer; text-decoration: underline dotted;">1 substrates
236	MKNK1	0.3491	0	0	" title="Overlapping EnrichrSubstrates" data-content="MKNK1 targets 1 genes from the input gene list.The full list of substrates is available below:MAPK3" style="cursor: pointer; text-decoration: underline dotted;">1 substrates
237	MAP3K3	0.3511	0	0	" title="Overlapping EnrichrSubstrates" data-content="MAP3K3 targets 4 genes from the input gene list.The full list of substrates is available below:RUVBL2 HIST1H4A TUBB DDB1" style="cursor: pointer; text-decoration: underline dotted;">4 substrates
238	BARK1	0.3545	0	0	" title="Overlapping EnrichrSubstrates" data-content="BARK1 targets 2 genes from the input gene list.The full list of substrates is available below:MAPK3 PIN1" style="cursor: pointer; text-decoration: underline dotted;">2 substrates
239	ACVR1	0.3594	0	0	" title="Overlapping EnrichrSubstrates" data-content="ACVR1 targets 1 genes from the input gene list.The full list of substrates is available below:STAT1" style="cursor: pointer; text-decoration: underline dotted;">1 substrates
240	FGFR3	0.3594	0	0	" title="Overlapping EnrichrSubstrates" data-content="FGFR3 targets 1 genes from the input gene list.The full list of substrates is available below:STAT1" style="cursor: pointer; text-decoration: underline dotted;">1 substrates
241	RPS6KB2	0.3594	0	0	" title="Overlapping EnrichrSubstrates" data-content="RPS6KB2 targets 1 genes from the input gene list.The full list of substrates is available below:GSK3B" style="cursor: pointer; text-decoration: underline dotted;">1 substrates
242	AKT3	0.3695	0	0	" title="Overlapping EnrichrSubstrates" data-content="AKT3 targets 1 genes from the input gene list.The full list of substrates is available below:GSK3B" style="cursor: pointer; text-decoration: underline dotted;">1 substrates
243	TNK2	0.3695	0	0	" title="Overlapping EnrichrSubstrates" data-content="TNK2 targets 1 genes from the input gene list.The full list of substrates is available below:HIST1H4A" style="cursor: pointer; text-decoration: underline dotted;">1 substrates
244	SGK3	0.3695	0	0	" title="Overlapping EnrichrSubstrates" data-content="SGK3 targets 1 genes from the input gene list.The full list of substrates is available below:GSK3B" style="cursor: pointer; text-decoration: underline dotted;">1 substrates
245	LATS1	0.3695	0	0	" title="Overlapping EnrichrSubstrates" data-content="LATS1 targets 1 genes from the input gene list.The full list of substrates is available below:CDK1" style="cursor: pointer; text-decoration: underline dotted;">1 substrates
246	PRKCE	0.3715	0	0	" title="Overlapping EnrichrSubstrates" data-content="PRKCE targets 2 genes from the input gene list.The full list of substrates is available below:ATF2 MAPK3" style="cursor: pointer; text-decoration: underline dotted;">2 substrates
247	DYRK1B	0.3795	0	0	" title="Overlapping EnrichrSubstrates" data-content="DYRK1B targets 1 genes from the input gene list.The full list of substrates is available below:CCND1" style="cursor: pointer; text-decoration: underline dotted;">1 substrates
248	BMX	0.3795	0	0	" title="Overlapping EnrichrSubstrates" data-content="BMX targets 1 genes from the input gene list.The full list of substrates is available below:PIM1" style="cursor: pointer; text-decoration: underline dotted;">1 substrates
249	EPHA6	0.3795	0	0	" title="Overlapping EnrichrSubstrates" data-content="EPHA6 targets 1 genes from the input gene list.The full list of substrates is available below:ABL1" style="cursor: pointer; text-decoration: underline dotted;">1 substrates
250	EPHA1	0.3795	0	0	" title="Overlapping EnrichrSubstrates" data-content="EPHA1 targets 1 genes from the input gene list.The full list of substrates is available below:ABL1" style="cursor: pointer; text-decoration: underline dotted;">1 substrates
251	CAMK4	0.3795	0	0	" title="Overlapping EnrichrSubstrates" data-content="CAMK4 targets 1 genes from the input gene list.The full list of substrates is available below:RELA" style="cursor: pointer; text-decoration: underline dotted;">1 substrates
252	STK3	0.3795	0	0	" title="Overlapping EnrichrSubstrates" data-content="STK3 targets 1 genes from the input gene list.The full list of substrates is available below:ABL1" style="cursor: pointer; text-decoration: underline dotted;">1 substrates
253	GRK2	0.3795	0	0	" title="Overlapping EnrichrSubstrates" data-content="GRK2 targets 1 genes from the input gene list.The full list of substrates is available below:SMAD2" style="cursor: pointer; text-decoration: underline dotted;">1 substrates
254	PRKCH	0.3893	0	0	" title="Overlapping EnrichrSubstrates" data-content="PRKCH targets 1 genes from the input gene list.The full list of substrates is available below:GSK3B" style="cursor: pointer; text-decoration: underline dotted;">1 substrates
255	FLT1	0.3893	0	0	" title="Overlapping EnrichrSubstrates" data-content="FLT1 targets 1 genes from the input gene list.The full list of substrates is available below:ETS1" style="cursor: pointer; text-decoration: underline dotted;">1 substrates
256	EPHA3	0.3893	0	0	" title="Overlapping EnrichrSubstrates" data-content="EPHA3 targets 1 genes from the input gene list.The full list of substrates is available below:ABL1" style="cursor: pointer; text-decoration: underline dotted;">1 substrates
257	LATS2	0.3893	0	0	" title="Overlapping EnrichrSubstrates" data-content="LATS2 targets 1 genes from the input gene list.The full list of substrates is available below:ABL1" style="cursor: pointer; text-decoration: underline dotted;">1 substrates
258	BCR	0.3989	0	0	" title="Overlapping EnrichrSubstrates" data-content="BCR targets 1 genes from the input gene list.The full list of substrates is available below:ABL1" style="cursor: pointer; text-decoration: underline dotted;">1 substrates
259	CAMKIIDELTA	0.3989	0	0	" title="Overlapping EnrichrSubstrates" data-content="CAMKIIDELTA targets 1 genes from the input gene list.The full list of substrates is available below:JAK1" style="cursor: pointer; text-decoration: underline dotted;">1 substrates
260	PLK2	0.4084	0	0	" title="Overlapping EnrichrSubstrates" data-content="PLK2 targets 1 genes from the input gene list.The full list of substrates is available below:TP73" style="cursor: pointer; text-decoration: underline dotted;">1 substrates
261	EIF2AK2	0.4084	0	0	" title="Overlapping EnrichrSubstrates" data-content="EIF2AK2 targets 1 genes from the input gene list.The full list of substrates is available below:CDK1" style="cursor: pointer; text-decoration: underline dotted;">1 substrates
262	MAPKAPK5	0.4084	0	0	" title="Overlapping EnrichrSubstrates" data-content="MAPKAPK5 targets 1 genes from the input gene list.The full list of substrates is available below:MAPK11" style="cursor: pointer; text-decoration: underline dotted;">1 substrates
263	EPHB1	0.4178	0	0	" title="Overlapping EnrichrSubstrates" data-content="EPHB1 targets 1 genes from the input gene list.The full list of substrates is available below:ABL1" style="cursor: pointer; text-decoration: underline dotted;">1 substrates
264	BMPR1B	0.4178	0	0	" title="Overlapping EnrichrSubstrates" data-content="BMPR1B targets 1 genes from the input gene list.The full list of substrates is available below:SMAD2" style="cursor: pointer; text-decoration: underline dotted;">1 substrates
265	CSK	0.427	0	0	" title="Overlapping EnrichrSubstrates" data-content="CSK targets 1 genes from the input gene list.The full list of substrates is available below:PML" style="cursor: pointer; text-decoration: underline dotted;">1 substrates
266	EPHA4	0.427	0	0	" title="Overlapping EnrichrSubstrates" data-content="EPHA4 targets 1 genes from the input gene list.The full list of substrates is available below:ABL1" style="cursor: pointer; text-decoration: underline dotted;">1 substrates
267	MAP3K5	0.4361	0	0	" title="Overlapping EnrichrSubstrates" data-content="MAP3K5 targets 1 genes from the input gene list.The full list of substrates is available below:MAPK8" style="cursor: pointer; text-decoration: underline dotted;">1 substrates
268	PKG1CGKI	0.445	0	0	" title="Overlapping EnrichrSubstrates" data-content="PKG1CGKI targets 1 genes from the input gene list.The full list of substrates is available below:SP1" style="cursor: pointer; text-decoration: underline dotted;">1 substrates
269	ITK	0.4538	0	0	" title="Overlapping EnrichrSubstrates" data-content="ITK targets 1 genes from the input gene list.The full list of substrates is available below:ETS1" style="cursor: pointer; text-decoration: underline dotted;">1 substrates
270	BLK	0.4709	0	0	" title="Overlapping EnrichrSubstrates" data-content="BLK targets 1 genes from the input gene list.The full list of substrates is available below:ABL1" style="cursor: pointer; text-decoration: underline dotted;">1 substrates
271	STK11	0.4793	0	0	" title="Overlapping EnrichrSubstrates" data-content="STK11 targets 1 genes from the input gene list.The full list of substrates is available below:SMAD4" style="cursor: pointer; text-decoration: underline dotted;">1 substrates
272	MAP2K7	0.4793	0	0	" title="Overlapping EnrichrSubstrates" data-content="MAP2K7 targets 1 genes from the input gene list.The full list of substrates is available below:MAPK8" style="cursor: pointer; text-decoration: underline dotted;">1 substrates
273	PRKAA2	0.4793	0	0	" title="Overlapping EnrichrSubstrates" data-content="PRKAA2 targets 1 genes from the input gene list.The full list of substrates is available below:TFAP2A" style="cursor: pointer; text-decoration: underline dotted;">1 substrates
274	PDGFRBETA	0.4793	0	0	" title="Overlapping EnrichrSubstrates" data-content="PDGFRBETA targets 1 genes from the input gene list.The full list of substrates is available below:MAX" style="cursor: pointer; text-decoration: underline dotted;">1 substrates
275	HCK	0.4793	0	0	" title="Overlapping EnrichrSubstrates" data-content="HCK targets 1 genes from the input gene list.The full list of substrates is available below:ABL1" style="cursor: pointer; text-decoration: underline dotted;">1 substrates
276	CLK1	0.4875	0	0	" title="Overlapping EnrichrSubstrates" data-content="CLK1 targets 1 genes from the input gene list.The full list of substrates is available below:ABL1" style="cursor: pointer; text-decoration: underline dotted;">1 substrates
277	EPHA2	0.4957	0	0	" title="Overlapping EnrichrSubstrates" data-content="EPHA2 targets 1 genes from the input gene list.The full list of substrates is available below:ABL1" style="cursor: pointer; text-decoration: underline dotted;">1 substrates
278	LCK	0.5	0	0	" title="Overlapping EnrichrSubstrates" data-content="LCK targets 3 genes from the input gene list.The full list of substrates is available below:MAPK1 MAPK3 STAT1" style="cursor: pointer; text-decoration: underline dotted;">3 substrates
279	MAP2K6	0.5115	0	0	" title="Overlapping EnrichrSubstrates" data-content="MAP2K6 targets 1 genes from the input gene list.The full list of substrates is available below:MAPK11" style="cursor: pointer; text-decoration: underline dotted;">1 substrates
280	PRKD2	0.5192	0	0	" title="Overlapping EnrichrSubstrates" data-content="PRKD2 targets 1 genes from the input gene list.The full list of substrates is available below:ETS1" style="cursor: pointer; text-decoration: underline dotted;">1 substrates
281	NLK	0.5192	0	0	" title="Overlapping EnrichrSubstrates" data-content="NLK targets 1 genes from the input gene list.The full list of substrates is available below:SMAD4" style="cursor: pointer; text-decoration: underline dotted;">1 substrates
282	PTK2	0.5269	0	0	" title="Overlapping EnrichrSubstrates" data-content="PTK2 targets 1 genes from the input gene list.The full list of substrates is available below:SUMO1" style="cursor: pointer; text-decoration: underline dotted;">1 substrates
283	PAK3	0.5269	0	0	" title="Overlapping EnrichrSubstrates" data-content="PAK3 targets 1 genes from the input gene list.The full list of substrates is available below:CCND1" style="cursor: pointer; text-decoration: underline dotted;">1 substrates
284	KDR	0.5561	0	0	" title="Overlapping EnrichrSubstrates" data-content="KDR targets 1 genes from the input gene list.The full list of substrates is available below:ETS1" style="cursor: pointer; text-decoration: underline dotted;">1 substrates
285	MAP2K4	0.5632	0	0	" title="Overlapping EnrichrSubstrates" data-content="MAP2K4 targets 1 genes from the input gene list.The full list of substrates is available below:MAPK8" style="cursor: pointer; text-decoration: underline dotted;">1 substrates
286	PAK1	0.5674	0	0	" title="Overlapping EnrichrSubstrates" data-content="PAK1 targets 2 genes from the input gene list.The full list of substrates is available below:CCND1 AURKA" style="cursor: pointer; text-decoration: underline dotted;">2 substrates
287	CK1DELTA	0.5836	0	0	" title="Overlapping EnrichrSubstrates" data-content="CK1DELTA targets 1 genes from the input gene list.The full list of substrates is available below:CDK1" style="cursor: pointer; text-decoration: underline dotted;">1 substrates
288	PKAGAMMA	0.6094	0	0	" title="Overlapping EnrichrSubstrates" data-content="PKAGAMMA targets 1 genes from the input gene list.The full list of substrates is available below:RELA" style="cursor: pointer; text-decoration: underline dotted;">1 substrates
289	SGK1	0.6508	0	0	" title="Overlapping EnrichrSubstrates" data-content="SGK1 targets 1 genes from the input gene list.The full list of substrates is available below:MAPK1" style="cursor: pointer; text-decoration: underline dotted;">1 substrates
290	PRKG1	0.6564	0	0	" title="Overlapping EnrichrSubstrates" data-content="PRKG1 targets 1 genes from the input gene list.The full list of substrates is available below:GTF2I" style="cursor: pointer; text-decoration: underline dotted;">1 substrates
291	MAPKAPK2	0.6618	0	0	" title="Overlapping EnrichrSubstrates" data-content="MAPKAPK2 targets 1 genes from the input gene list.The full list of substrates is available below:PIAS1" style="cursor: pointer; text-decoration: underline dotted;">1 substrates
292	PKCGAMMA	0.6928	0	0	" title="Overlapping EnrichrSubstrates" data-content="PKCGAMMA targets 1 genes from the input gene list.The full list of substrates is available below:RARA" style="cursor: pointer; text-decoration: underline dotted;">1 substrates
293	PKC	0.7254	0	0	" title="Overlapping EnrichrSubstrates" data-content="PKC targets 1 genes from the input gene list.The full list of substrates is available below:NFE2L2" style="cursor: pointer; text-decoration: underline dotted;">1 substrates
